# Supplementary material for: H migration in peroxy radicals under atmospheric conditions
Source: Copernicus journal article supplement (doi:10.5194/acp-20-7429-2020), 2020-06-26
Supplement: Supplementary file 1 [file acp-20-7429-2020-supplement.zip]

Archive with 5 entries (5 files):
- SupportingInformation.pdf
- SARderivation.ods
- QuantumChemicalData.txt
- SARderivation.pdf
- acp-20-7429-2020-supplement-title-page.pdf
