# Supplementary material for: H migration in peroxy radicals under atmospheric conditions
Source: Copernicus journal article supplement (doi:10.5194/acp-20-7429-2020), 2020-06-26
Supplement: Supplementary file 1 [file acp-20-7429-2020-supplement.zip › acp-20-7429-2020-supplement-title-page.pdf]

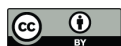

## *Supplement of*

# **H migration in peroxy radicals under atmospheric conditions**

**Luc Vereecken and Barbara Nozière**

*Correspondence to:* Luc Vereecken ([l.vereecken@fz-juelich.de](mailto:l.vereecken@fz-juelich.de))

- [acp-20-7429-2020-supplement-title-page.pdf](#)
- [QuantumChemicalData.txt](#)
- [SARderivation.ods](#)
- [SARderivation.pdf](#)
- [SupportingInformation.pdf](#)

The copyright of individual parts of the supplement might differ from the CC BY 4.0 License.
