# Supplementary material for: H migration in peroxy radicals under atmospheric conditions
Source: Copernicus journal article supplement (doi:10.5194/acp-20-7429-2020), 2020-06-26
Supplement: Supplementary file 1 [file acp-20-7429-2020-supplement.zip › QuantumChemicalData.txt]

H-migration in alkyl peroxy radicals under atmospheric conditions
                    � Quantum chemical data �
                    L. Vereecken, B. Nozi�re

========================================================================

******************************************
1-propylperoxy M05-2X/6-311G(d,p) geometry
******************************************

C3H7OO.pp
------------
E(CBS-QB3) excl. ZPE (Hartree): -268.51526600 
E(CBS-QB3) inc. ZPE scaled by 0.99 (Hartree): -268.41411500 
E(CCSD(T)/6-31+(d')) (Hartree): -268.10483636 
E(CCSD/6-31+(d')) (Hartree): -268.08077533 
E(MP2/6-31+(d')) (Hartree): -268.02496734 
E(MP2/CBSB3) (Hartree): -268.31869994 
E(MP2/CBSB4) (Hartree): -268.07956514 
E(MP3/6-31+(d')) (Hartree): -268.06035677 
E(MP3/CBSB4) (Hartree): -268.11959168 
E(PMP2/6-31+(d')) (Hartree): -268.02768219 
E(PMP2/CBSB3) (Hartree): -268.32180487 
E(PMP2/CBSB4) (Hartree): -268.08228315 
E(PMP3/6-31+(d')) (Hartree): -268.06203018 
E(PMP3/CBSB4) (Hartree): -268.12126760 
E(PUHF/6-31+(d')) (Hartree): -267.28349276 
E(PUHF/CBSB3) (Hartree): -267.37561706 
E(PUHF/CBSB4) (Hartree): -267.29258667 
E(UHF/6-31+(d')) (Hartree): -267.27909590 
E(UHF/CBSB3) (Hartree): -267.37053824 
E(UHF/CBSB4) (Hartree): -267.28818573 
E(UM052X+HF-M052X/6-311G(d,p)) (Hartree): -268.87114969 
E(CBS-APNO) excl. ZPE (Hartree): -268.83592010 
E(MP2-Full/CBSB6) (Hartree): -268.51101752 
E(MP2/6-311++G(2df,p)) (Hartree): -268.30734302 
E(MP2/6-311G(d,p)) (Hartree): -268.16558810 
E(MP2/CBSB5) (Hartree): -268.39773353 
E(MP3/6-311++G(2df,p)) (Hartree): -268.34472245 
E(MP3/6-311G(d,p)) (Hartree): -268.20314755 
E(PMP2/6-311++G(2df,p)) (Hartree): -268.31044402 
E(PMP2/6-311G(d,p)) (Hartree): -268.16813515 
E(PMP2/CBSB5) (Hartree): -268.40090752 
E(PMP2/CBSB6) (Hartree): -268.51405776 
E(PMP3/6-311++G(2df,p)) (Hartree): -268.34654878 
E(PMP3/6-311G(d,p)) (Hartree): -268.20460188 
E(PUHF/6-311++G(2df,p)) (Hartree): -267.37270019 
E(PUHF/6-311G(d,p)) (Hartree): -267.35245255 
E(PUHF/CBSB5) (Hartree): -267.40464469 
E(PUHF/CBSB6) (Hartree): -267.39192076 
E(QCISD(T)/6-311++G(2df,p)) (Hartree): -268.39852247 
E(QCISD/6-311++G(2df,p)) (Hartree): -268.36186208 
E(QCISD/6-311G(d,p)) (Hartree): -268.22389271 
E(UHF/6-311++G(2df,p)) (Hartree): -267.36762614 
E(UHF/6-311G(d,p)) (Hartree): -267.34815344 
E(UHF/CBSB5) (Hartree): -267.39947144 
E(UHF/CBSB5A) (Hartree): -267.39292231 
E(UHF/CBSB6) (Hartree): -267.38697521 
E(UM052X/6-311G(d,p)) (Hartree): -268.87114969 
E(CCSD(T)/Aug-CC-pVDZ) (Hartree): -268.21299310 
E(CCSD/Aug-CC-pVDZ) (Hartree): -268.18370453 
E(MP2/Aug-CC-pVDZ) (Hartree): -268.12422802 
E(MP3/Aug-CC-pVDZ) (Hartree): -268.16638195 
E(PMP2/Aug-CC-pVDZ) (Hartree): -268.12717812 
E(PMP3/Aug-CC-pVDZ) (Hartree): -268.16816503 
E(PUHF/Aug-CC-pVDZ) (Hartree): -267.32068686 
E(UHF/Aug-CC-pVDZ) (Hartree): -267.31588756 
E(UM052X/6-311G(d,p)) (Hartree): -268.87114969 
E(CCSD(T)/Aug-CC-pVTZ) (Hartree): -268.45133888 
E(CCSD/Aug-CC-pVTZ) (Hartree): -268.40902807 
E(MP2/Aug-CC-pVTZ) (Hartree): -268.36229266 
E(MP3/Aug-CC-pVTZ) (Hartree): -268.39706458 
E(PMP2/Aug-CC-pVTZ) (Hartree): -268.36545699 
E(PMP3/Aug-CC-pVTZ) (Hartree): -268.39893124 
E(PUHF/Aug-CC-pVTZ) (Hartree): -267.38678483 
E(UHF/Aug-CC-pVTZ) (Hartree): -267.38163290 
E(UM052X/6-311G(d,p)) (Hartree): -268.87114969 
E(CCSD(T)/Aug-CC-pVQZ) (Hartree): -268.51893394 
E(CCSD/Aug-CC-pVQZ) (Hartree): -268.47357419 
E(MP2/Aug-CC-pVQZ) (Hartree): -268.43729025 
E(MP3/Aug-CC-pVQZ) (Hartree): -268.46352170 
E(PMP2/Aug-CC-pVQZ) (Hartree): -268.44048702 
E(PMP3/Aug-CC-pVQZ) (Hartree): -268.46538849 
E(PUHF/Aug-CC-pVQZ) (Hartree): -267.40343298 
E(UHF/Aug-CC-pVQZ) (Hartree): -267.39823432 
E(UM052X/6-311G(d,p)) (Hartree): -268.87114969 
E(UM052X/6-311G(d,p)) (Hartree): -268.87114969 
Electronic state : 2-A
Cartesian coordinates (Angs):
     O      -1.733788     -0.597671       0.448195
     O      -1.110717     -0.129449      -0.590353
     C      -0.202737      0.939042      -0.213450
     C       0.965979      0.388759       0.578199
     C       1.785729     -0.619220      -0.221928
     H       0.109263      1.363637      -1.166138
     H      -0.784780      1.662422       0.353932
     H       1.587536      1.233082       0.883059
     H       0.571702     -0.068627       1.485852
     H       2.196871     -0.160182      -1.122190
     H       1.166794     -1.462592      -0.524950
     H       2.614828     -1.002267       0.370776
Rotational constants (GHz):    9.6578200    3.2835800    3.0438000
Vibrational harmonic frequencies (cm-1):
      100.8762                  169.7745                  249.8768            
      299.5304                  437.1533                  569.8155            
      777.8164                  887.6486                  910.3056            
      963.5108                 1072.8422                 1127.7196            
     1194.7343                 1247.8786                 1314.7907            
     1324.2231                 1392.9413                 1419.7718            
     1440.7538                 1504.6431                 1506.0750            
     1522.8941                 1528.9235                 3078.7665            
     3091.6094                 3105.4626                 3129.5183            
     3147.0652                 3163.3508                 3168.3935            
Zero-point correction (Hartree): 0.102173

C3H7OO.1-5Hshift
------------
E(CBS-QB3) excl. ZPE (Hartree): -268.47080900 
E(CBS-QB3) inc. ZPE scaled by 0.99 (Hartree): -268.37579500 
E(CCSD(T)/6-31+(d')) (Hartree): -268.04683497 
E(CCSD/6-31+(d')) (Hartree): -268.01972816 
E(MP2/6-31+(d')) (Hartree): -267.96959342 
E(MP2/CBSB3) (Hartree): -268.27422258 
E(MP2/CBSB4) (Hartree): -268.03219766 
E(MP3/6-31+(d')) (Hartree): -268.00026440 
E(MP3/CBSB4) (Hartree): -268.06693641 
E(PMP2/6-31+(d')) (Hartree): -267.97668194 
E(PMP2/CBSB3) (Hartree): -268.28128922 
E(PMP2/CBSB4) (Hartree): -268.03895209 
E(PMP3/6-31+(d')) (Hartree): -268.00435539 
E(PMP3/CBSB4) (Hartree): -268.07078216 
E(PUHF/6-31+(d')) (Hartree): -267.20886693 
E(PUHF/CBSB3) (Hartree): -267.30625539 
E(PUHF/CBSB4) (Hartree): -267.22333901 
E(UHF/6-31+(d')) (Hartree): -267.19870984 
E(UHF/CBSB3) (Hartree): -267.29609145 
E(UHF/CBSB4) (Hartree): -267.21359427 
E(UM052X/6-311G(d,p)) (Hartree): -268.82419787 
E(CBS-APNO) excl. ZPE (Hartree): -268.79195510 
E(MP2-Full/CBSB6) (Hartree): -268.46833859 
E(MP2/6-311++G(2df,p)) (Hartree): -268.26282011 
E(MP2/6-311G(d,p)) (Hartree): -268.11788730 
E(MP2/CBSB5) (Hartree): -268.35442062 
E(MP3/6-311++G(2df,p)) (Hartree): -268.29403010 
E(MP3/6-311G(d,p)) (Hartree): -268.15047885 
E(PMP2/6-311++G(2df,p)) (Hartree): -268.26990595 
E(PMP2/6-311G(d,p)) (Hartree): -268.12484582 
E(PMP2/CBSB5) (Hartree): -268.36152031 
E(PMP2/CBSB6) (Hartree): -268.47531018 
E(PMP3/6-311++G(2df,p)) (Hartree): -268.29803730 
E(PMP3/6-311G(d,p)) (Hartree): -268.15444899 
E(PUHF/6-311++G(2df,p)) (Hartree): -267.30329730 
E(PUHF/6-311G(d,p)) (Hartree): -267.28363932 
E(PUHF/CBSB5) (Hartree): -267.33546953 
E(PUHF/CBSB6) (Hartree): -267.32364372 
E(QCISD(T)/6-311++G(2df,p)) (Hartree): -268.35059430 
E(QCISD/6-311++G(2df,p)) (Hartree): -268.30951854 
E(QCISD/6-311G(d,p)) (Hartree): -268.17017633 
E(UHF/6-311++G(2df,p)) (Hartree): -267.29311024 
E(UHF/6-311G(d,p)) (Hartree): -267.27362558 
E(UHF/CBSB5) (Hartree): -267.32526128 
E(UHF/CBSB5A) (Hartree): -267.31933910 
E(UHF/CBSB6) (Hartree): -267.31360713 
E(UM052X/6-311G(d,p)) (Hartree): -268.82419787 
E(CCSD(T)/Aug-CC-pVDZ) (Hartree): -268.16656684 
E(CCSD/Aug-CC-pVDZ) (Hartree): -268.13341676 
E(MP2/Aug-CC-pVDZ) (Hartree): -268.08126975 
E(MP3/Aug-CC-pVDZ) (Hartree): -268.11771595 
E(PMP2/Aug-CC-pVDZ) (Hartree): -268.08808366 
E(PMP3/Aug-CC-pVDZ) (Hartree): -268.12158900 
E(PUHF/Aug-CC-pVDZ) (Hartree): -267.25275771 
E(UHF/Aug-CC-pVDZ) (Hartree): -267.24293493 
E(UM052X/6-311G(d,p)) (Hartree): -268.82419787 
E(CCSD(T)/Aug-CC-pVTZ) (Hartree): -268.40516909 
E(CCSD/Aug-CC-pVTZ) (Hartree): -268.35838937 
E(MP2/Aug-CC-pVTZ) (Hartree): -268.31978772 
E(MP3/Aug-CC-pVTZ) (Hartree): -268.34819126 
E(PMP2/Aug-CC-pVTZ) (Hartree): -268.32684598 
E(PMP3/Aug-CC-pVTZ) (Hartree): -268.35217284 
E(PUHF/Aug-CC-pVTZ) (Hartree): -267.31796611 
E(UHF/Aug-CC-pVTZ) (Hartree): -267.30781196 
E(UM052X/6-311G(d,p)) (Hartree): -268.82419787 
E(CCSD(T)/Aug-CC-pVQZ) (Hartree): -268.47260117 
E(CCSD/Aug-CC-pVQZ) (Hartree): -268.42266388 
E(MP2/Aug-CC-pVQZ) (Hartree): -268.39473870 
E(MP3/Aug-CC-pVQZ) (Hartree): -268.41447433 
E(PMP2/Aug-CC-pVQZ) (Hartree): -268.40183547 
E(PMP3/Aug-CC-pVQZ) (Hartree): -268.41845893 
E(PUHF/Aug-CC-pVQZ) (Hartree): -267.33419315 
E(UHF/Aug-CC-pVQZ) (Hartree): -267.32398843 
E(UM052X/6-311G(d,p)) (Hartree): -268.82419787 
E(UM052X/6-311G(d,p)) (Hartree): -268.82419787 
Electronic state : 2-A
Cartesian coordinates (Angs):
     C      -1.321624     -0.856572       0.024692
     C      -1.131654      0.624117      -0.160099
     C       0.268525      1.050878       0.312981
     O       1.218871      0.259367      -0.376081
     O       1.127235     -1.027544       0.135641
     H      -1.605824     -1.184162       1.019646
     H      -1.810643     -1.398276      -0.776684
     H      -1.873366      1.190497       0.410669
     H      -1.229534      0.894202      -1.210167
     H       0.388566      0.900702       1.386999
     H       0.487308      2.082237       0.044487
     H      -0.016836     -1.250329      -0.016873
Rotational constants (GHz):    7.6380400    4.9719700    3.3851200
Vibrational harmonic frequencies (cm-1):
    i1840.6989                  173.4551                  357.6840            
      448.5695                  473.7608                  527.7248            
      658.9014                  840.1692                  895.7318            
      940.1001                  966.1864                 1050.5463            
     1107.0672                 1114.3270                 1166.0611            
     1202.1807                 1239.5074                 1305.5380            
     1363.0993                 1398.5330                 1470.7991            
     1497.0939                 1506.8552                 1589.3577            
     3058.5138                 3091.4853                 3132.1303            
     3144.7616                 3171.3857                 3235.9027            
Zero-point correction (Hartree): 0.095973

**********************************************
1-propylperoxy M05-2X/6-311+G(2df,2p) geometry
**********************************************

C3H7OO.pp
------------
E(UM052X/6-311+G(2df,2p)) (Hartree): -268.89508244 
Electronic state : 2-A
Cartesian coordinates (Angs):
     O      -1.746739     -0.584165       0.448633
     O      -1.107631     -0.139106      -0.586780
     C      -0.201018      0.930299      -0.220370
     C       0.967166      0.391226       0.574146
     C       1.791027     -0.618178      -0.214812
     H       0.112145      1.345469      -1.174057
     H      -0.781286      1.658294       0.337364
     H       1.583102      1.239917       0.867971
     H       0.579709     -0.056162       1.486398
     H       2.187493     -0.169280      -1.123145
     H       1.183214     -1.472571      -0.498809
     H       2.627535     -0.979580       0.375664
Rotational constants (GHz):    9.7730900    3.2676700    3.0357300
Vibrational harmonic frequencies (cm-1):
       97.3767                  168.9000                  247.3369            
      297.9801                  438.3030                  565.6553            
      773.5342                  886.4356                  909.0002            
      962.5312                 1072.4625                 1126.7178            
     1194.4630                 1255.6330                 1315.0506            
     1324.0488                 1395.8815                 1416.1941            
     1441.1506                 1507.9705                 1508.4147            
     1525.5042                 1532.1551                 3088.6847            
     3098.7771                 3107.5799                 3134.3025            
     3153.1547                 3168.1192                 3170.6912            
Zero-point correction (Hartree): 0.102253

C3H7OO.1-5Hshift
------------
E(UM052X/6-311+G(2df,2p)) (Hartree): -268.84848023 
Electronic state : 2-A
Cartesian coordinates (Angs):
     C      -1.317432     -0.858371       0.025971
     C      -1.133252      0.618861      -0.161964
     C       0.262964      1.049094       0.311568
     O       1.217208      0.263014      -0.371967
     O       1.132344     -1.022623       0.132500
     H      -1.601484     -1.184274       1.018163
     H      -1.798916     -1.404627      -0.772643
     H      -1.872899      1.183538       0.407663
     H      -1.233293      0.888059      -1.209013
     H       0.380492      0.904145       1.384026
     H       0.476047      2.078936       0.043140
     H      -0.020037     -1.246413      -0.009043
Rotational constants (GHz):    7.6761800    4.9800100    3.3923200
Vibrational harmonic frequencies (cm-1):
    i1862.3372                  168.7968                  357.3773            
      443.9176                  475.4908                  525.8291            
      657.7636                  840.1954                  895.4931            
      942.0315                  968.2763                 1052.5782            
     1109.0850                 1122.0700                 1160.8987            
     1200.0708                 1238.3546                 1302.5534            
     1365.8256                 1395.9590                 1475.6677            
     1500.5721                 1509.0057                 1591.1858            
     3062.6727                 3093.3336                 3135.0717            
     3151.2606                 3170.3403                 3239.6712            
Zero-point correction (Hartree): 0.096028

#################################################################################
1-propxylperoxy M06-2X-D3/aug-cc-pVTZ geometry
#################################################################################

C3H7OO.1-5Hshift
----------------
IRC pathway available
E(CCSD(T)/Aug-CC-pVTZ) (Hartree): -268.40502081 
E(CCSD/Aug-CC-pVTZ) (Hartree): -268.35829433 
     T1 diagnostic:  0.021433 
E(MP2/Aug-CC-pVTZ) (Hartree): -268.31958731 
E(MP3/Aug-CC-pVTZ) (Hartree): -268.34807759 
E(PMP2/Aug-CC-pVTZ) (Hartree): -268.32668142 
E(PMP3/Aug-CC-pVTZ) (Hartree): -268.35207741 
E(PUHF/Aug-CC-pVTZ) (Hartree): -267.31815960 
E(UHF/Aug-CC-pVTZ) (Hartree): -267.30795325 
E(UM062X/Aug-CC-pVTZ) (Hartree): -268.78412894 
Electronic state : 2-A
Cartesian coordinates (Angs):
     C      -1.320798     -0.858333       0.024834
     C      -1.135195      0.619692      -0.159732
     C       0.265736      1.050099       0.308139
     O       1.219593      0.262447      -0.369996
     O       1.132887     -1.025764       0.132254
     H      -1.610919     -1.187027       1.018283
     H      -1.801836     -1.405270      -0.777957
     H      -1.870952      1.189007       0.415590
     H      -1.241255      0.893108      -1.208158
     H       0.382048      0.915476       1.385598
     H       0.480372      2.081384       0.033255
     H      -0.015761     -1.248892      -0.004114
Rotational constants (GHz):    7.6576600    4.9650800    3.3798600
Vibrational harmonic frequencies (cm-1):
    i1827.0614                  169.4042                  358.2651            
      444.0478                  472.3197                  522.6118            
      651.3616                  829.2172                  887.5218            
      933.2219                  963.5311                 1040.6064            
     1093.0864                 1120.1505                 1147.6962            
     1188.2724                 1222.1735                 1291.8524            
     1348.4290                 1378.6519                 1454.8753            
     1479.0601                 1488.2801                 1579.7735            
     3049.0272                 3068.5396                 3121.2819            
     3125.4408                 3144.4376                 3214.2200            
Zero-point correction (Hartree): 0.095199

C3H7OO.pm
---------
E(CCSD(T)/Aug-CC-pVTZ) (Hartree): -268.45048473 
E(CCSD/Aug-CC-pVTZ) (Hartree): -268.40814912 
     T1 diagnostic:  0.022741 
E(MP2/Aug-CC-pVTZ) (Hartree): -268.36156275 
E(MP3/Aug-CC-pVTZ) (Hartree): -268.39633590 
E(PMP2/Aug-CC-pVTZ) (Hartree): -268.36475672 
E(PMP3/Aug-CC-pVTZ) (Hartree): -268.39820891 
E(PUHF/Aug-CC-pVTZ) (Hartree): -267.38587761 
E(UHF/Aug-CC-pVTZ) (Hartree): -267.38067484 
E(UM062X/Aug-CC-pVTZ) (Hartree): -268.83000020 
Electronic state : 2-A
Cartesian coordinates (Angs):
     O      -1.534333     -0.889472       0.132782
     O      -1.228042      0.251407      -0.407513
     C      -0.211911      0.951894       0.342853
     C       1.168876      0.594605      -0.170868
     C       1.528715     -0.870738       0.033352
     H      -0.436526      2.006624       0.192168
     H      -0.346533      0.681635       1.389193
     H       1.227240      0.858734      -1.228203
     H       1.880080      1.236560       0.353567
     H       0.849047     -1.522413      -0.513401
     H       1.470277     -1.142990       1.087480
     H       2.541333     -1.068198      -0.314985
Rotational constants (GHz):    8.5359900    3.8603800    2.9661300
Vibrational harmonic frequencies (cm-1):
      111.2669                  118.0149                  244.5464            
      313.3700                  440.3681                  542.0508            
      776.3213                  866.4383                  926.6877            
      952.8873                 1072.1685                 1112.7286            
     1180.7665                 1253.4520                 1295.5020            
     1327.4498                 1381.6624                 1395.4530            
     1425.1025                 1480.2501                 1484.2690            
     1502.0333                 1508.4176                 3064.6345            
     3069.3454                 3089.6168                 3103.9224            
     3138.9442                 3147.3513                 3153.2045            
Zero-point correction (Hartree): 0.101329

C3H7OO.pp
---------
E(CCSD(T)/Aug-CC-pVTZ) (Hartree): -268.45124440 
E(CCSD/Aug-CC-pVTZ) (Hartree): -268.40901593 
     T1 diagnostic:  0.022927 
E(MP2/Aug-CC-pVTZ) (Hartree): -268.36227104 
E(MP3/Aug-CC-pVTZ) (Hartree): -268.39711065 
E(PMP2/Aug-CC-pVTZ) (Hartree): -268.36543324 
E(PMP3/Aug-CC-pVTZ) (Hartree): -268.39897400 
E(PUHF/Aug-CC-pVTZ) (Hartree): -267.38708059 
E(UHF/Aug-CC-pVTZ) (Hartree): -267.38192907 
E(UM062X/Aug-CC-pVTZ) (Hartree): -268.83055167 
Electronic state : 2-A
Cartesian coordinates (Angs):
     O      -1.744068     -0.596595       0.444772
     O      -1.114788     -0.126611      -0.587968
     C      -0.203342      0.932739      -0.211350
     C       0.968312      0.385451       0.575503
     C       1.795099     -0.615646      -0.220706
     H       0.107699      1.359635      -1.164436
     H      -0.778938      1.661895       0.356422
     H       1.583299      1.234328       0.880096
     H       0.580889     -0.071630       1.486592
     H       2.198656     -0.157540      -1.124677
     H       1.188152     -1.469477      -0.519069
     H       2.630675     -0.986827       0.369962
Rotational constants (GHz):    9.7381100    3.2594400    3.0252300
Vibrational harmonic frequencies (cm-1):
       71.8966                  152.5007                  231.9508            
      294.5480                  437.4560                  562.5229            
      764.9126                  881.4746                  907.5275            
      960.5400                 1065.6054                 1115.8721            
     1182.9522                 1250.1612                 1301.7900            
     1316.1548                 1375.6561                 1401.2888            
     1421.2478                 1481.2984                 1489.5480            
     1505.4988                 1509.1760                 3065.4856            
     3073.6012                 3088.9775                 3112.4112            
     3136.2715                 3146.3373                 3150.0051            
Zero-point correction (Hartree): 0.101275

C3H7OO.pt
---------
E(CCSD(T)/Aug-CC-pVTZ) (Hartree): -268.45096604 
E(CCSD/Aug-CC-pVTZ) (Hartree): -268.40884254 
     T1 diagnostic:  0.022830 
E(MP2/Aug-CC-pVTZ) (Hartree): -268.36193529 
E(MP3/Aug-CC-pVTZ) (Hartree): -268.39704580 
E(PMP2/Aug-CC-pVTZ) (Hartree): -268.36510163 
E(PMP3/Aug-CC-pVTZ) (Hartree): -268.39890809 
E(PUHF/Aug-CC-pVTZ) (Hartree): -267.38758096 
E(UHF/Aug-CC-pVTZ) (Hartree): -267.38242553 
E(UM062X/Aug-CC-pVTZ) (Hartree): -268.83025130 
Electronic state : 2-A
Cartesian coordinates (Angs):
     O      -1.977133     -0.620296       0.266691
     O      -1.445621      0.411041      -0.314278
     C      -0.110914      0.659384       0.176609
     C       0.863466     -0.370502      -0.352424
     C       2.272287     -0.097276       0.159014
     H       0.124178      1.662684      -0.177142
     H      -0.158715      0.652211       1.265412
     H       0.523765     -1.356748      -0.035795
     H       0.841348     -0.350727      -1.442920
     H       2.306597     -0.132787       1.248287
     H       2.622009      0.886866      -0.154984
     H       2.973822     -0.837100      -0.221356
Rotational constants (GHz):   15.4067200    2.5481300    2.3980800
Vibrational harmonic frequencies (cm-1):
      100.3754                  119.2940                  233.6542            
      267.5600                  383.9047                  576.1537            
      763.6737                  894.3761                  904.5695            
      989.4477                 1063.8916                 1136.0728            
     1195.9191                 1254.9386                 1300.9655            
     1326.0583                 1339.8547                 1411.2834            
     1417.1280                 1489.8090                 1499.7248            
     1505.5420                 1514.9612                 3063.5533            
     3075.7389                 3088.0513                 3112.0991            
     3131.5898                 3145.1830                 3150.2637            
Zero-point correction (Hartree): 0.101277

C3H7OO.tp
---------
E(CCSD(T)/Aug-CC-pVTZ) (Hartree): -268.45055638 
E(CCSD/Aug-CC-pVTZ) (Hartree): -268.40856779 
     T1 diagnostic:  0.022769 
E(MP2/Aug-CC-pVTZ) (Hartree): -268.36180243 
E(MP3/Aug-CC-pVTZ) (Hartree): -268.39662347 
E(PMP2/Aug-CC-pVTZ) (Hartree): -268.36495613 
E(PMP3/Aug-CC-pVTZ) (Hartree): -268.39847845 
E(PUHF/Aug-CC-pVTZ) (Hartree): -267.38764269 
E(UHF/Aug-CC-pVTZ) (Hartree): -267.38250890 
E(UM062X/Aug-CC-pVTZ) (Hartree): -268.82990296 
Electronic state : 2-A
Cartesian coordinates (Angs):
     O       2.203832     -0.324828       0.107526
     O       0.995236     -0.296150      -0.359997
     C       0.196447      0.721864       0.286662
     C      -1.212423      0.605159      -0.246838
     C      -1.881003     -0.708729       0.139024
     H       0.252069      0.538211       1.359875
     H       0.656796      1.681876       0.056821
     H      -1.781117      1.450498       0.143712
     H      -1.186820      0.717675      -1.332021
     H      -1.933599     -0.811346       1.223535
     H      -1.323035     -1.558190      -0.251785
     H      -2.894967     -0.760667      -0.253449
Rotational constants (GHz):   13.0775200    2.7784800    2.5077300
Vibrational harmonic frequencies (cm-1):
       70.2269                  134.1721                  207.7863            
      303.9169                  390.0946                  536.2947            
      759.0076                  897.2030                  922.8152            
      956.4743                 1085.0489                 1135.0036            
     1168.8197                 1260.0708                 1298.9783            
     1308.9278                 1374.6082                 1408.1873            
     1420.3232                 1482.8650                 1497.2841            
     1508.9831                 1511.5204                 3067.6854            
     3073.3005                 3082.1469                 3108.9104            
     3137.0704                 3141.7146                 3149.3300            
Zero-point correction (Hartree): 0.101148

C3H7OO.tt
---------
E(CCSD(T)/Aug-CC-pVTZ) (Hartree): -268.45034039 
E(CCSD/Aug-CC-pVTZ) (Hartree): -268.40843170 
     T1 diagnostic:  0.022725 
E(MP2/Aug-CC-pVTZ) (Hartree): -268.36147308 
E(MP3/Aug-CC-pVTZ) (Hartree): -268.39659073 
E(PMP2/Aug-CC-pVTZ) (Hartree): -268.36462063 
E(PMP3/Aug-CC-pVTZ) (Hartree): -268.39844202 
E(PUHF/Aug-CC-pVTZ) (Hartree): -267.38802992 
E(UHF/Aug-CC-pVTZ) (Hartree): -267.38290642 
E(UM062X/Aug-CC-pVTZ) (Hartree): -268.82962228 
Point group : CS
Electronic state : 2-A"
Cartesian coordinates (Angs):
     O       2.174120      1.037483       0.000000
     O       1.391438      0.003691       0.000000
     C       0.000000      0.390456       0.000000
     C      -0.833988     -0.868527       0.000000
     C      -2.320385     -0.532327       0.000000
     H      -0.168203      0.999211       0.888743
     H      -0.168203      0.999211      -0.888743
     H      -0.578619     -1.463718      -0.877528
     H      -0.578619     -1.463718       0.877528
     H      -2.590559      0.049978      -0.881326
     H      -2.590559      0.049978       0.881326
     H      -2.923470     -1.437945       0.000000
Rotational constants (GHz):   23.1828900    2.2100900    2.0965800
Vibrational harmonic frequencies (cm-1):
       76.4683 (  A")           113.7369 (  A")           203.8240 (  A')     
      238.5580 (  A")           408.5897 (  A')           509.3770 (  A')     
      760.7442 (  A")           891.0856 (  A")           931.2050 (  A')     
     1011.2976 (  A')          1070.9970 (  A')          1164.7513 (  A')     
     1169.2914 (  A")          1262.9224 (  A")          1295.4901 (  A')     
     1319.6612 (  A")          1332.0526 (  A')          1417.5784 (  A')     
     1419.8862 (  A')          1498.0452 (  A')          1503.7397 (  A')     
     1507.0422 (  A")          1518.0830 (  A')          3065.1685 (  A')     
     3073.1800 (  A')          3081.7131 (  A')          3106.8118 (  A")     
     3128.8596 (  A")          3142.1016 (  A")          3147.6829 (  A')     
Zero-point correction (Hartree): 0.101082

*******************************************************
1-propylperoxy B3LYP/6-31G(d,p) (5 d-orbitals) geometry
*******************************************************

C3H7OO.pp
------------
E(CCSD(T)/Aug-CC-pVDZ) (Hartree): -268.21484266 
E(CCSD/Aug-CC-pVDZ) (Hartree): -268.18504683 
E(MP2/Aug-CC-pVDZ) (Hartree): -268.12450615 
E(MP3/Aug-CC-pVDZ) (Hartree): -268.16677719 
E(PMP2/Aug-CC-pVDZ) (Hartree): -268.12745520 
E(PMP3/Aug-CC-pVDZ) (Hartree): -268.16860894 
E(PUHF/Aug-CC-pVDZ) (Hartree): -267.31967402 
E(UHF/Aug-CC-pVDZ) (Hartree): -267.31496393 
E(CCSD(T)/Aug-CC-pVTZ) (Hartree): -268.45189248 
E(CCSD/Aug-CC-pVTZ) (Hartree): -268.40901005 
     T1 diagnostic:  0.024312 
E(MP2/Aug-CC-pVTZ) (Hartree): -268.36135017 
E(MP3/Aug-CC-pVTZ) (Hartree): -268.39617511 
E(PMP2/Aug-CC-pVTZ) (Hartree): -268.36451558 
E(PMP3/Aug-CC-pVTZ) (Hartree): -268.39809499 
E(PUHF/Aug-CC-pVTZ) (Hartree): -267.38533757 
E(UHF/Aug-CC-pVTZ) (Hartree): -267.38027260 
E(UB+HF-LYP/6-31G(d,p)) (Hartree): -268.85393461 
Electronic state : 2-A
Cartesian coordinates (Angs):
     O      -1.786815     -0.596081       0.445502
     O      -1.131327     -0.124553      -0.603321
     C      -0.202717      0.931911      -0.204642
     C       0.975366      0.371454       0.580824
     C       1.839906     -0.604930      -0.221953
     H       0.105245      1.374028      -1.157605
     H      -0.775282      1.660676       0.375392
     H       1.577060      1.222793       0.923633
     H       0.575738     -0.114995       1.477412
     H       2.275513     -0.120145      -1.103028
     H       1.249108     -1.458403      -0.566900
     H       2.662427     -0.989495       0.388276
Rotational constants (GHz):    9.7240200    3.1353000    2.9307500
Vibrational harmonic frequencies (cm-1):
       82.2847                  145.0351                  215.5943            
      289.6605                  428.6900                  548.4449            
      759.2124                  859.4408                  887.8425            
      943.4167                 1050.3331                 1109.6323            
     1158.3034                 1195.3064                 1286.6783            
     1303.2867                 1378.4422                 1393.1278            
     1431.4952                 1489.7149                 1493.3892            
     1512.5702                 1520.3375                 3048.6590            
     3049.9837                 3071.0796                 3094.3317            
     3119.3837                 3133.0422                 3135.0881            
Zero-point correction (Hartree): 0.100544

C3H7OO.pm
------------
E(CCSD(T)/Aug-CC-pVDZ) (Hartree): -268.21408533 
E(CCSD/Aug-CC-pVDZ) (Hartree): -268.18419049 
E(MP2/Aug-CC-pVDZ) (Hartree): -268.12380276 
E(MP3/Aug-CC-pVDZ) (Hartree): -268.16602006 
E(PMP2/Aug-CC-pVDZ) (Hartree): -268.12678704 
E(PMP3/Aug-CC-pVDZ) (Hartree): -268.16786503 
E(PUHF/Aug-CC-pVDZ) (Hartree): -267.31850008 
E(UHF/Aug-CC-pVDZ) (Hartree): -267.31373448 
E(CCSD(T)/Aug-CC-pVTZ) (Hartree): -268.45114156 
E(CCSD/Aug-CC-pVTZ) (Hartree): -268.40816248 
     T1 diagnostic:  0.024133 
E(MP2/Aug-CC-pVTZ) (Hartree): -268.36065404 
E(MP3/Aug-CC-pVTZ) (Hartree): -268.39541721 
E(PMP2/Aug-CC-pVTZ) (Hartree): -268.36385251 
E(PMP3/Aug-CC-pVTZ) (Hartree): -268.39734897 
E(PUHF/Aug-CC-pVTZ) (Hartree): -267.38419332 
E(UHF/Aug-CC-pVTZ) (Hartree): -267.37907579 
E(UB+HF-LYP/6-31G(d,p)) (Hartree): -268.85321107 
Electronic state : 2-A
Cartesian coordinates (Angs):
     O      -1.553757     -0.915353       0.125817
     O      -1.260684      0.263579      -0.402337
     C      -0.217952      0.947360       0.354239
     C       1.167913      0.599341      -0.180700
     C       1.577975     -0.860289       0.034613
     H      -0.442765      2.009924       0.219129
     H      -0.346318      0.666067       1.402655
     H       1.202308      0.851502      -1.247594
     H       1.880188      1.269531       0.318586
     H       0.883282     -1.544646      -0.459231
     H       1.592459     -1.115543       1.099442
     H       2.578760     -1.041115      -0.369742
Rotational constants (GHz):    8.4319900    3.7246200    2.8774800
Vibrational harmonic frequencies (cm-1):
       91.0730                  116.2197                  228.7189            
      312.8803                  425.8173                  524.9283            
      770.6709                  843.2164                  914.2373            
      929.1198                 1055.7797                 1104.8245            
     1159.5593                 1197.8101                 1289.2486            
     1304.1998                 1380.2764                 1392.3500            
     1435.3544                 1483.1238                 1488.7515            
     1512.1156                 1517.2925                 3039.6088            
     3053.2530                 3071.0225                 3080.7902            
     3121.1157                 3137.4101                 3139.8720            
Zero-point correction (Hartree): 0.100514

C3H7OO.pt
------------
E(CCSD(T)/Aug-CC-pVDZ) (Hartree): -268.21446948 
E(CCSD/Aug-CC-pVDZ) (Hartree): -268.18475218 
E(MP2/Aug-CC-pVDZ) (Hartree): -268.12405707 
E(MP3/Aug-CC-pVDZ) (Hartree): -268.16657245 
E(PMP2/Aug-CC-pVDZ) (Hartree): -268.12700760 
E(PMP3/Aug-CC-pVDZ) (Hartree): -268.16840313 
E(PUHF/Aug-CC-pVDZ) (Hartree): -267.31996708 
E(UHF/Aug-CC-pVDZ) (Hartree): -267.31525613 
E(CCSD(T)/Aug-CC-pVTZ) (Hartree): -268.45162681 
E(CCSD/Aug-CC-pVTZ) (Hartree): -268.40882983 
     T1 diagnostic:  0.024235 
E(MP2/Aug-CC-pVTZ) (Hartree): -268.36102503 
E(MP3/Aug-CC-pVTZ) (Hartree): -268.39609297 
E(PMP2/Aug-CC-pVTZ) (Hartree): -268.36419192 
E(PMP3/Aug-CC-pVTZ) (Hartree): -268.39801132 
E(PUHF/Aug-CC-pVTZ) (Hartree): -267.38572533 
E(UHF/Aug-CC-pVTZ) (Hartree): -267.38065929 
E(UB+HF-LYP/6-31G(d,p)) (Hartree): -268.85386301 
Electronic state : 2-A
Cartesian coordinates (Angs):
     O      -1.993595     -0.642060       0.262013
     O      -1.460536      0.423636      -0.314742
     C      -0.113956      0.668137       0.188300
     C       0.872389     -0.356363      -0.356121
     C       2.294521     -0.107422       0.157199
     H       0.113114      1.683252      -0.152590
     H      -0.164389      0.649078       1.281063
     H       0.524427     -1.350719      -0.056795
     H       0.851371     -0.322655      -1.451697
     H       2.340284     -0.161499       1.250449
     H       2.664328      0.879115      -0.143837
     H       2.986189     -0.855297      -0.241020
Rotational constants (GHz):   15.0335200    2.5012400    2.3500100
Vibrational harmonic frequencies (cm-1):
      105.6169                  110.0191                  239.1366            
      264.3474                  371.2825                  559.1459            
      767.8402                  877.3758                  900.6697            
      945.9649                 1046.0742                 1127.4810            
     1163.8870                 1208.6792                 1284.3892            
     1323.1458                 1329.6929                 1405.8174            
     1430.7781                 1491.9435                 1509.0134            
     1514.7926                 1523.9827                 3045.4492            
     3056.0132                 3070.1898                 3094.8233            
     3114.9698                 3125.6009                 3135.2541            
Zero-point correction (Hartree): 0.100566

C3H7OO.tp
------------
E(CCSD(T)/Aug-CC-pVDZ) (Hartree): -268.21401041 
E(CCSD/Aug-CC-pVDZ) (Hartree): -268.18443329 
E(MP2/Aug-CC-pVDZ) (Hartree): -268.12395739 
E(MP3/Aug-CC-pVDZ) (Hartree): -268.16617159 
E(PMP2/Aug-CC-pVDZ) (Hartree): -268.12689229 
E(PMP3/Aug-CC-pVDZ) (Hartree): -268.16799105 
E(PUHF/Aug-CC-pVDZ) (Hartree): -267.31996735 
E(UHF/Aug-CC-pVDZ) (Hartree): -267.31527619 
E(CCSD(T)/Aug-CC-pVTZ) (Hartree): -268.45121889 
E(CCSD/Aug-CC-pVTZ) (Hartree): -268.40857490 
     T1 diagnostic:  0.024144 
E(MP2/Aug-CC-pVTZ) (Hartree): -268.36093889 
E(MP3/Aug-CC-pVTZ) (Hartree): -268.39571332 
E(PMP2/Aug-CC-pVTZ) (Hartree): -268.36409062 
E(PMP3/Aug-CC-pVTZ) (Hartree): -268.39761981 
E(PUHF/Aug-CC-pVTZ) (Hartree): -267.38584968 
E(UHF/Aug-CC-pVTZ) (Hartree): -267.38080159 
E(UB+HF-LYP/6-31G(d,p)) (Hartree): -268.85307909 
Electronic state : 2-A
Cartesian coordinates (Angs):
     O       2.235897     -0.324474       0.115359
     O       1.005898     -0.304515      -0.368225
     C       0.199523      0.725174       0.282353
     C      -1.222096      0.605675      -0.244078
     C      -1.910673     -0.708028       0.141745
     H       0.265015      0.555087       1.361742
     H       0.654473      1.691525       0.043648
     H      -1.787294      1.460351       0.147845
     H      -1.204272      0.720270      -1.334569
     H      -1.978473     -0.813369       1.230295
     H      -1.357842     -1.569190      -0.243894
     H      -2.926490     -0.749686      -0.262262
Rotational constants (GHz):   12.9601800    2.7058900    2.4470600
Vibrational harmonic frequencies (cm-1):
       58.9242                  135.2606                  203.0715            
      298.6009                  380.5207                  520.8910            
      752.7097                  883.1317                  911.0834            
      928.6019                 1064.6764                 1126.5512            
     1160.0828                 1208.3584                 1248.6538            
     1309.4781                 1375.5421                 1402.7347            
     1430.8932                 1490.3336                 1501.5308            
     1515.7009                 1522.1746                 3047.9591            
     3051.3077                 3064.2360                 3085.4052            
     3119.0755                 3124.0342                 3135.1558            
Zero-point correction (Hartree): 0.100369

C3H7OO.tt
------------
E(CCSD(T)/Aug-CC-pVDZ) (Hartree): -268.21377269 
E(CCSD/Aug-CC-pVDZ) (Hartree): -268.18426299 
E(MP2/Aug-CC-pVDZ) (Hartree): -268.12359380 
E(MP3/Aug-CC-pVDZ) (Hartree): -268.16609020 
E(PMP2/Aug-CC-pVDZ) (Hartree): -268.12652238 
E(PMP3/Aug-CC-pVDZ) (Hartree): -268.16790617 
E(PUHF/Aug-CC-pVDZ) (Hartree): -267.32028632 
E(UHF/Aug-CC-pVDZ) (Hartree): -267.31560592 
E(CCSD(T)/Aug-CC-pVTZ) (Hartree): -268.45100394 
E(CCSD/Aug-CC-pVTZ) (Hartree): -268.40843046 
     T1 diagnostic:  0.024103 
E(MP2/Aug-CC-pVTZ) (Hartree): -268.36062080 
E(MP3/Aug-CC-pVTZ) (Hartree): -268.39567012 
E(PMP2/Aug-CC-pVTZ) (Hartree): -268.36376782 
E(PMP3/Aug-CC-pVTZ) (Hartree): -268.39757425 
E(PUHF/Aug-CC-pVTZ) (Hartree): -267.38617632 
E(UHF/Aug-CC-pVTZ) (Hartree): -267.38113769 
E(UB+HF-LYP/6-31G(d,p)) (Hartree): -268.85291439 
Point group : CS
Electronic state : 2-A"
Cartesian coordinates (Angs):
     O       2.199261      1.052789       0.000000
     O       1.402360     -0.002423       0.000000
     C       0.000000      0.397861       0.000000
     C      -0.843727     -0.866625       0.000000
     C      -2.342559     -0.546744       0.000000
     H      -0.166930      1.012379       0.890678
     H      -0.166930      1.012379      -0.890678
     H      -0.584884     -1.467097      -0.879790
     H      -0.584884     -1.467097       0.879790
     H      -2.628206      0.032710      -0.884736
     H      -2.628206      0.032710       0.884736
     H      -2.935212     -1.465864       0.000000
Rotational constants (GHz):   22.9382600    2.1642900    2.0538400
Vibrational harmonic frequencies (cm-1):
       59.8636 (  A")           112.3133 (  A")           198.6634 (  A')     
      232.6382 (  A")           397.7964 (  A')           492.0456 (  A')     
      763.9491 (  A")           891.5197 (  A")           923.1632 (  A')     
      957.2864 (  A')          1051.4564 (  A')          1151.6156 (  A')     
     1164.3641 (  A")          1204.4160 (  A')          1257.2695 (  A")     
     1320.3988 (  A")          1333.8385 (  A')          1415.4734 (  A')     
     1430.5254 (  A')          1505.5123 (  A')          1510.3583 (  A')     
     1514.2860 (  A")          1526.3750 (  A')          3046.5543 (  A')     
     3053.1460 (  A')          3063.7461 (  A')          3086.9988 (  A")     
     3112.1862 (  A")          3125.4500 (  A")          3127.0313 (  A')     
Zero-point correction (Hartree): 0.100308

C3H7OO.1-5Hshift
------------
E(CCSD(T)/Aug-CC-pVDZ) (Hartree): -268.16912755 
E(CCSD/Aug-CC-pVDZ) (Hartree): -268.13585609 
E(MP2/Aug-CC-pVDZ) (Hartree): -268.08466945 
E(MP3/Aug-CC-pVDZ) (Hartree): -268.12054783 
E(PMP2/Aug-CC-pVDZ) (Hartree): -268.09043277 
E(PMP3/Aug-CC-pVDZ) (Hartree): -268.12388489 
E(PUHF/Aug-CC-pVDZ) (Hartree): -267.25247165 
E(UHF/Aug-CC-pVDZ) (Hartree): -267.24417677 
E(CCSD(T)/Aug-CC-pVTZ) (Hartree): -268.40651643 
E(CCSD/Aug-CC-pVTZ) (Hartree): -268.35959546 
     T1 diagnostic:  0.020221 
E(MP2/Aug-CC-pVTZ) (Hartree): -268.32212347 
E(MP3/Aug-CC-pVTZ) (Hartree): -268.34981218 
E(PMP2/Aug-CC-pVTZ) (Hartree): -268.32810179 
E(PMP3/Aug-CC-pVTZ) (Hartree): -268.35324224 
E(PUHF/Aug-CC-pVTZ) (Hartree): -267.31712935 
E(UHF/Aug-CC-pVTZ) (Hartree): -267.30853754 
E(UB+HF-LYP/6-31G(d,p)) (Hartree): -268.80823801 
Electronic state : 2-A
Cartesian coordinates (Angs):
     C      -1.347435     -0.855444       0.021383
     C      -1.138925      0.627648      -0.156254
     C       0.274716      1.055450       0.310623
     O       1.238495      0.268605      -0.374278
     O       1.132008     -1.050739       0.135982
     H      -1.626356     -1.196882       1.018736
     H      -1.842609     -1.393980      -0.785079
     H      -1.874751      1.206287       0.421745
     H      -1.249775      0.906572      -1.208457
     H       0.390898      0.928553       1.393917
     H       0.490622      2.091975       0.032774
     H       0.017813     -1.251375      -0.021785
Rotational constants (GHz):    7.5072100    4.8654900    3.3093800
Vibrational harmonic frequencies (cm-1):
    i1537.4201                  170.7701                  352.4158            
      431.7463                  459.6428                  519.8584            
      638.5332                  825.8812                  870.1050            
      904.4970                  944.1935                 1016.7377            
     1049.4194                 1073.5669                 1136.5421            
     1178.9891                 1224.9792                 1282.9069            
     1351.2412                 1380.7973                 1463.5062            
     1481.8699                 1491.9236                 1597.3878            
     3016.5340                 3046.9631                 3099.9858            
     3114.6993                 3120.3361                 3206.2282            
Zero-point correction (Hartree): 0.094435

/home/luc/quantum/C3H7OO/B3LYP/C3H6OOH-5-yl.ppt
-----------------------------------------------
E(UB+HF-LYP/6-31G(d,p)) (Hartree): -268.81628940 
Electronic state : 2-A
Cartesian coordinates (Angs):
     H      -2.539975     -0.431434       0.717913
     O      -1.856477     -0.711269       0.087573
     O      -1.307375      0.589456      -0.273428
     C       0.003167      0.656944       0.277517
     C       0.997096     -0.311155      -0.399221
     C       2.374533     -0.200863       0.160705
     H       0.294923      1.699099       0.100487
     H      -0.032693      0.484896       1.361870
     H       0.601056     -1.324809      -0.264899
     H       0.990650     -0.097032      -1.474118
     H       2.630489     -0.672242       1.104414
     H       3.117588      0.446469      -0.292825
Rotational constants (GHz):   13.7887900    2.5672600    2.3761200
Vibrational harmonic frequencies (cm-1):
       71.0105                  109.1533                  156.8672            
      213.9272                  277.7081                  368.5569            
      492.1394                  545.4989                  758.8231            
      860.5568                  900.9490                  989.1341            
     1035.4413                 1077.1672                 1179.6620            
     1273.6790                 1287.1956                 1325.1874            
     1365.9018                 1401.0753                 1472.3393            
     1487.1142                 1505.6907                 3026.0050            
     3047.1444                 3082.9978                 3103.9018            
     3160.7196                 3262.9399                 3757.1452            
Zero-point correction (Hartree): 0.097040

*********************************************************
1-propylperoxy B3LYP/6-31G(2df,p) (6 d-orbitals) geometry
*********************************************************

C3H7OO.pp
------------
E(G3SX(MP3)) excl. ZPE (Hartree): -268.76664834 
E(G3SX(MP3)) inc. ZPE scaled by 0.9854 (Hartree): -268.66805907 
E(G3SX) excl. ZPE (Hartree): -268.77267673 
E(G3SX) inc. ZPE scaled by 0.9854 (Hartree): -268.67408746 
E(G3X(MP2)) excl. ZPE (Hartree): -268.54747628 
E(G3X(MP2)) inc. ZPE scaled by 0.9854 (Hartree): -268.44888701 
E(G3X(MP3)) excl. ZPE (Hartree): -268.75812180 
E(G3X(MP3)) inc. ZPE scaled by 0.9854 (Hartree): -268.65953253 
E(G3X) excl. ZPE (Hartree): -268.73977412 
E(G3X) inc. ZPE scaled by 0.9854 (Hartree): -268.64118485 
E(MP2-Full/G3Xlarge) (Hartree): -268.54000852 
E(MP2-Full/G3large) (Hartree): -268.54000852 
E(MP2/6-31+G(d)) (Hartree): -268.01165969 
E(MP2/6-31G(2df,p)) (Hartree): -268.20364787 
E(MP2/6-31G(d)) (Hartree): -267.99631402 
E(MP2/G3MP2large) (Hartree): -268.31797904 
E(MP3/6-31+G(d)) (Hartree): -268.04574776 
E(MP3/6-31G(2df,p)) (Hartree): -268.24698004 
E(MP3/6-31G(d)) (Hartree): -268.03149685 
E(MP4/6-31+G(d)) (Hartree): -268.08705996 
E(MP4/6-31G(2df,p)) (Hartree): -268.29145209 
E(MP4/6-31G(d)) (Hartree): -268.06990494 
E(PMP2/6-31+G(d)) (Hartree): -268.01442093 
E(PMP2/6-31G(2df,p)) (Hartree): -268.20642381 
E(PMP2/6-31G(d)) (Hartree): -267.99876521 
E(PMP2/G3MP2large) (Hartree): -268.32108192 
E(PMP2/G3Xlarge) (Hartree): -268.54313370 
E(PMP2/G3large) (Hartree): -268.54313370 
E(PMP3/6-31+G(d)) (Hartree): -268.04746314 
E(PMP3/6-31G(2df,p)) (Hartree): -268.24849893 
E(PMP3/6-31G(d)) (Hartree): -268.03287063 
E(PUHF/6-31+G(d)) (Hartree): -267.28591371 
E(PUHF/6-31G(2df,p)) (Hartree): -267.30955332 
E(PUHF/6-31G(d)) (Hartree): -267.28027014 
E(PUHF/G3MP2large) (Hartree): -267.37466280 
E(PUHF/G3Xlarge) (Hartree): -267.37536919 
E(PUHF/G3large) (Hartree): -267.37536919 
E(QCISD(T)/6-31G(d)) (Hartree): -268.07522897 
E(QCISD/6-31G(d)) (Hartree): -268.05529452 
E(UB3LYP/6-31G(2df,p)) (Hartree): -268.87119384 
E(UHF/6-31+G(d)) (Hartree): -267.28146774 
E(UHF/6-31G(2df,p)) (Hartree): -267.30478714 
E(UHF/6-31G(d)) (Hartree): -267.27606860 
E(UHF/G3MP2large) (Hartree): -267.36964155 
E(UHF/G3Xlarge) (Hartree): -267.37030884 
E(UHF/G3large) (Hartree): -267.37030884 
Electronic state : 2-A
Cartesian coordinates (Angs):
     O      -1.781969     -0.594639       0.444045
     O      -1.131952     -0.126414      -0.597883
     C      -0.203773      0.929822      -0.207271
     C       0.974403      0.373435       0.579526
     C       1.837809     -0.604678      -0.221317
     H       0.103694      1.367356      -1.162320
     H      -0.775017      1.661348       0.370104
     H       1.575765      1.225894       0.918369
     H       0.576548     -0.109724       1.478293
     H       2.272083     -0.121448      -1.103535
     H       1.247001     -1.458642      -0.564430
     H       2.660660     -0.987837       0.388605
Rotational constants (GHz):    9.7614900    3.1456700    2.9386200
Vibrational harmonic frequencies (cm-1):
       78.8384                  144.1135                  219.0282            
      289.5468                  424.8855                  546.8016            
      754.8352                  855.3696                  884.0859            
      938.3927                 1047.4182                 1104.0809            
     1161.1687                 1198.0617                 1283.5787            
     1296.0109                 1372.0636                 1383.3964            
     1416.3464                 1475.1746                 1477.5885            
     1500.2019                 1506.2053                 3037.2741            
     3038.6626                 3056.6737                 3080.2725            
     3107.0524                 3119.6162                 3120.2208            
Zero-point correction (Hartree): 0.100050

C3H7OO.1-5Hshift
------------
E(G3SX(MP3)) excl. ZPE (Hartree): -268.72093949 
E(G3SX(MP3)) inc. ZPE scaled by 0.9854 (Hartree): -268.62832568 
E(G3SX) excl. ZPE (Hartree): -268.72743569 
E(G3SX) inc. ZPE scaled by 0.9854 (Hartree): -268.63482188 
E(G3X(MP2)) excl. ZPE (Hartree): -268.50062316 
E(G3X(MP2)) inc. ZPE scaled by 0.9854 (Hartree): -268.40800936 
E(G3X(MP3)) excl. ZPE (Hartree): -268.71026777 
E(G3X(MP3)) inc. ZPE scaled by 0.9854 (Hartree): -268.61765396 
E(G3X) excl. ZPE (Hartree): -268.69344629 
E(G3X) inc. ZPE scaled by 0.9854 (Hartree): -268.60083249 
E(MP2-Full/G3Xlarge) (Hartree): -268.49796878 
E(MP2-Full/G3large) (Hartree): -268.49796878 
E(MP2/6-31+G(d)) (Hartree): -267.96277347 
E(MP2/6-31G(2df,p)) (Hartree): -268.15829295 
E(MP2/6-31G(d)) (Hartree): -267.94502143 
E(MP2/G3MP2large) (Hartree): -268.27597796 
E(MP3/6-31+G(d)) (Hartree): -267.99160243 
E(MP3/6-31G(2df,p)) (Hartree): -268.19615150 
E(MP3/6-31G(d)) (Hartree): -267.97566983 
E(MP4/6-31+G(d)) (Hartree): -268.03501959 
E(MP4/6-31G(2df,p)) (Hartree): -268.24304704 
E(MP4/6-31G(d)) (Hartree): -268.01521670 
E(PMP2/6-31+G(d)) (Hartree): -267.96890702 
E(PMP2/6-31G(2df,p)) (Hartree): -268.16446687 
E(PMP2/6-31G(d)) (Hartree): -267.95122113 
E(PMP2/G3MP2large) (Hartree): -268.28210899 
E(PMP2/G3Xlarge) (Hartree): -268.50411223 
E(PMP2/G3large) (Hartree): -268.50411223 
E(PMP3/6-31+G(d)) (Hartree): -267.99517500 
E(PMP3/6-31G(2df,p)) (Hartree): -268.19966796 
E(PMP3/6-31G(d)) (Hartree): -267.97927220 
E(PUHF/6-31+G(d)) (Hartree): -267.21363620 
E(PUHF/6-31G(2df,p)) (Hartree): -267.24004080 
E(PUHF/6-31G(d)) (Hartree): -267.20739843 
E(PUHF/G3MP2large) (Hartree): -267.30575666 
E(PUHF/G3Xlarge) (Hartree): -267.30646674 
E(PUHF/G3large) (Hartree): -267.30646674 
E(QCISD(T)/6-31G(d)) (Hartree): -268.01906127 
E(QCISD/6-31G(d)) (Hartree): -267.99624976 
E(UB3LYP/6-31G(2df,p)) (Hartree): -268.82532182 
E(UHF/6-31+G(d)) (Hartree): -267.20484009 
E(UHF/6-31G(2df,p)) (Hartree): -267.23114197 
E(UHF/6-31G(d)) (Hartree): -267.19850385 
E(UHF/G3MP2large) (Hartree): -267.29693014 
E(UHF/G3Xlarge) (Hartree): -267.29762051 
E(UHF/G3large) (Hartree): -267.29762051 
Electronic state : 2-A
Cartesian coordinates (Angs):
     C      -1.348712     -0.852193       0.023067
     C      -1.136815      0.628960      -0.157608
     C       0.278450      1.052377       0.308889
     O       1.237251      0.262373      -0.370828
     O       1.129286     -1.047194       0.133206
     H      -1.631235     -1.190692       1.019786
     H      -1.841589     -1.391772      -0.782930
     H      -1.868304      1.212793       0.419354
     H      -1.245910      0.906763      -1.209844
     H       0.391845      0.926171       1.392452
     H       0.496859      2.087687       0.030003
     H       0.008497     -1.247242      -0.013934
Rotational constants (GHz):    7.5520500    4.8756800    3.3200100
Vibrational harmonic frequencies (cm-1):
    i1601.2647                  171.3483                  351.2221            
      432.4477                  460.9959                  516.6841            
      634.8244                  820.3491                  866.6104            
      907.7387                  942.0611                 1018.2646            
     1048.6385                 1069.9381                 1120.6734            
     1173.4002                 1215.8935                 1278.2984            
     1342.4574                 1372.4514                 1451.5758            
     1468.2368                 1476.9241                 1591.3722            
     3005.4695                 3031.1502                 3085.4155            
     3102.1539                 3105.2171                 3193.1758            
Zero-point correction (Hartree): 0.093986

********************************************
1-propylperoxy B3LYP/6-311G(2d,d,p) geometry
********************************************

C3H7OO.pp
------------
E(CBS-QB3) excl. ZPE (Hartree): -268.51528500 
E(CBS-QB3) inc. ZPE scaled by 0.99 (Hartree): -268.41632000 
E(CCSD(T)/6-31+(d')) (Hartree): -268.10599362 
E(CCSD/6-31+(d')) (Hartree): -268.08156318 
E(MP2/6-31+(d')) (Hartree): -268.02493225 
E(MP2/CBSB3) (Hartree): -268.31781666 
E(MP2/CBSB4) (Hartree): -268.07940379 
E(MP3/6-31+(d')) (Hartree): -268.06032550 
E(MP3/CBSB4) (Hartree): -268.11941321 
E(PMP2/6-31+(d')) (Hartree): -268.02766405 
E(PMP2/CBSB3) (Hartree): -268.32092783 
E(PMP2/CBSB4) (Hartree): -268.08213845 
E(PMP3/6-31+(d')) (Hartree): -268.06204666 
E(PMP3/CBSB4) (Hartree): -268.12113655 
E(PUHF/6-31+(d')) (Hartree): -267.28270367 
E(PUHF/CBSB3) (Hartree): -267.37449263 
E(PUHF/CBSB4) (Hartree): -267.29177152 
E(UB+HF-LYP/CBSB7) (Hartree): -268.92722238 
E(UHF/6-31+(d')) (Hartree): -267.27835321 
E(UHF/CBSB3) (Hartree): -267.36947700 
E(UHF/CBSB4) (Hartree): -267.28741732 
Electronic state : 2-A
Cartesian coordinates (Angs):
     O      -1.793219     -0.593605       0.442961
     O      -1.133197     -0.124511      -0.597757
     C      -0.198939      0.931183      -0.206299
     C       0.978388      0.372657       0.578396
     C       1.841075     -0.607213      -0.220452
     H       0.104418      1.364250      -1.161909
     H      -0.769315      1.660873       0.370543
     H       1.580563      1.223995       0.914397
     H       0.582788     -0.107109       1.477955
     H       2.278404     -0.126083      -1.100478
     H       1.250880     -1.459626      -0.563244
     H       2.660449     -0.991137       0.391234
Rotational constants (GHz):    9.7669700    3.1283200    2.9220200
Vibrational harmonic frequencies (cm-1):
       81.9737                  142.4932                  212.8313            
      288.5942                  426.8633                  548.9899            
      757.4635                  853.6919                  880.8399            
      939.7672                 1045.6215                 1105.5811            
     1147.3621                 1187.8827                 1285.5597            
     1299.8627                 1374.6445                 1386.7157            
     1420.7838                 1479.3053                 1483.1505            
     1501.1188                 1508.1440                 3031.2421            
     3033.1783                 3059.5051                 3072.4598            
     3095.7918                 3107.9442                 3120.2043            
Zero-point correction (Hartree): 0.099965

C3H7OO.1-5Hshift
------------
E(CBS-QB3) excl. ZPE (Hartree): -268.47127400 
E(CBS-QB3) inc. ZPE scaled by 0.99 (Hartree): -268.37830000 
E(CCSD(T)/6-31+(d')) (Hartree): -268.04793974 
E(CCSD/6-31+(d')) (Hartree): -268.02071411 
E(MP2/6-31+(d')) (Hartree): -267.97121840 
E(MP2/CBSB3) (Hartree): -268.27564756 
E(MP2/CBSB4) (Hartree): -268.03403051 
E(MP3/6-31+(d')) (Hartree): -268.00144369 
E(MP3/CBSB4) (Hartree): -268.06826699 
E(PMP2/6-31+(d')) (Hartree): -267.97774531 
E(PMP2/CBSB3) (Hartree): -268.28202502 
E(PMP2/CBSB4) (Hartree): -268.04013896 
E(PMP3/6-31+(d')) (Hartree): -268.00525520 
E(PMP3/CBSB4) (Hartree): -268.07179395 
E(PUHF/6-31+(d')) (Hartree): -267.20778490 
E(PUHF/CBSB3) (Hartree): -267.30530747 
E(PUHF/CBSB4) (Hartree): -267.22278906 
E(UB+HF-LYP/CBSB7) (Hartree): -268.88174782 
E(UHF/6-31+(d')) (Hartree): -267.19847190 
E(UHF/CBSB3) (Hartree): -267.29615909 
E(UHF/CBSB4) (Hartree): -267.21400485 
Cartesian coordinates (Angs):
     C      -1.345729     -0.854788       0.020816
     C      -1.137906      0.627422      -0.155337
     C       0.275144      1.057891       0.308252
     O       1.237022      0.264593      -0.372491
     O       1.131017     -1.049420       0.135927
     H      -1.641527     -1.195121       1.011559
     H      -1.822380     -1.394326      -0.793346
     H      -1.869783      1.203901       0.426338
     H      -1.251143      0.908203      -1.204789
     H       0.394619      0.934628       1.389466
     H       0.493835      2.089100       0.022683
     H       0.003017     -1.250919      -0.001782
Rotational constants (GHz):    7.5192800    4.8780400    3.3148200
Vibrational harmonic frequencies (cm-1):
    i1637.7497                  168.3976                  357.6518            
      439.0501                  462.6266                  518.1870            
      635.8912                  823.1099                  864.5698            
      898.4194                  941.5078                 1013.3982            
     1036.4377                 1072.0797                 1124.9208            
     1170.7507                 1217.5576                 1280.3849            
     1345.9706                 1371.6008                 1452.4487            
     1471.9687                 1479.8152                 1584.8982            
     2999.0693                 3032.1463                 3079.6377            
     3092.9397                 3105.9685                 3181.8359            
Zero-point correction (Hartree): 0.093913

*****************************************
1-propylperoxy QCISD/6-311G(d,p) geometry
*****************************************

C3H7OO.pp
------------
E(CBS-APNO) excl. ZPE (Hartree): -268.83582500 
E(MP2/6-311++G(2df,p)) (Hartree): -268.30633465 
E(MP2/6-311G(d,p)) (Hartree): -268.16492079 
E(MP2/CBSB5) (Hartree): -268.39654560 
E(MP2/CBSB6) (Hartree): -268.51017877 
E(MP3/6-311++G(2df,p)) (Hartree): -268.34389141 
E(MP3/6-311G(d,p)) (Hartree): -268.20264450 
E(PMP2/6-311++G(2df,p)) (Hartree): -268.30942804 
E(PMP2/6-311G(d,p)) (Hartree): -268.16749711 
E(PMP2/CBSB5) (Hartree): -268.39970774 
E(PMP2/CBSB6) (Hartree): -268.51320651 
E(PMP3/6-311++G(2df,p)) (Hartree): -268.34577272 
E(PMP3/6-311G(d,p)) (Hartree): -268.20417623 
E(PUHF/6-311++G(2df,p)) (Hartree): -267.37124326 
E(PUHF/6-311G(d,p)) (Hartree): -267.35116818 
E(PUHF/CBSB5) (Hartree): -267.40312269 
E(PUHF/CBSB6) (Hartree): -267.39073228 
E(QCISD/6-311G(d,p)) (Hartree): -268.22469993 
E(QCISD(T)/6-311++G(2df,p)) (Hartree): -268.39918801 
E(QCISD/6-311++G(2df,p)) (Hartree): -268.36231221 
E(UHF/6-311++G(2df,p)) (Hartree): -267.36627857 
E(UHF/6-311G(d,p)) (Hartree): -267.34694742 
E(UHF/CBSB5) (Hartree): -267.39806174 
E(UHF/CBSB5A) (Hartree): -267.39167600 
E(UHF/CBSB6) (Hartree): -267.38589847 
Electronic state : 2-A
Cartesian coordinates (Angs):
     O      -1.746594     -0.612628       0.450890
     O      -1.121224     -0.114018      -0.606102
     C      -0.209337      0.939843      -0.199819
     C       0.971127      0.381031       0.582869
     C       1.804359     -0.616150      -0.228927
     H       0.104387      1.387119      -1.148616
     H      -0.784784      1.663815       0.384527
     H       1.591807      1.231426       0.894817
     H       0.585900     -0.091090       1.493350
     H       2.213627     -0.141189      -1.129269
     H       1.192650     -1.468182      -0.542820
     H       2.642065     -0.997070       0.364964
Rotational constants (GHz):    9.5426728    3.2256911    2.9979261

C3H7OO.1-5Hshift
------------
E(CBS-APNO) excl. ZPE (Hartree): -268.79183199 
E(MP2-Full/CBSB6) (Hartree): -268.46830546 
E(MP2/6-311++G(2df,p)) (Hartree): -268.26274904 
E(MP2/6-311G(d,p)) (Hartree): -268.11812244 
E(MP2/CBSB5) (Hartree): -268.35419403 
E(MP3/6-311++G(2df,p)) (Hartree): -268.29382080 
E(MP3/6-311G(d,p)) (Hartree): -268.15059301 
E(PMP2/6-311++G(2df,p)) (Hartree): -268.26993937 
E(PMP2/6-311G(d,p)) (Hartree): -268.12518153 
E(PMP2/CBSB5) (Hartree): -268.36139776 
E(PMP2/CBSB6) (Hartree): -268.47537898 
E(PMP3/6-311++G(2df,p)) (Hartree): -268.29789679 
E(PMP3/6-311G(d,p)) (Hartree): -268.15463056 
E(PUHF/6-311++G(2df,p)) (Hartree): -267.30209399 
E(PUHF/6-311G(d,p)) (Hartree): -267.28257366 
E(PUHF/CBSB5) (Hartree): -267.33420278 
E(PUHF/CBSB6) (Hartree): -267.32256168 
E(QCISD/6-311G(d,p)) (Hartree): -268.17061019 
E(QCISD(T)/6-311++G(2df,p)) (Hartree): -268.35103190 
E(QCISD/6-311++G(2df,p)) (Hartree): -268.30960163 
E(UHF/6-311++G(2df,p)) (Hartree): -267.29178040 
E(UHF/6-311G(d,p)) (Hartree): -267.27243960 
E(UHF/CBSB5) (Hartree): -267.32386829 
E(UHF/CBSB5A) (Hartree): -267.31804715 
E(UHF/CBSB6) (Hartree): -267.31240107 
Electronic state : 2-A
Cartesian coordinates (Angs):
     C      -1.327440     -0.857135       0.021357
     C      -1.131616      0.635022      -0.157570
     C       0.277257      1.052439       0.313617
     O       1.229544      0.257324      -0.378049
     O       1.118884     -1.042749       0.137811
     H      -1.626337     -1.180883       1.020453
     H      -1.839740     -1.385941      -0.782819
     H      -1.873011      1.208357       0.417185
     H      -1.229820      0.909272      -1.213078
     H       0.394879      0.905314       1.393710
     H       0.505539      2.087698       0.042737
     H      -0.028145     -1.242375      -0.020707
Rotational constants (GHz):    7.5465469    4.9415321    3.3561090

*****************************************
1-propylperoxy B3LYP/aug-cc-pVDZ geometry
*****************************************

C3H7OO.pp
------------
E(CCSD(T)/Aug-CC-pVDZ) (Hartree): -268.21489556 
E(CCSD/Aug-CC-pVDZ) (Hartree): -268.18511137 
E(MP2/Aug-CC-pVDZ) (Hartree): -268.12475935 
E(MP3/Aug-CC-pVDZ) (Hartree): -268.16698052 
E(PMP2/Aug-CC-pVDZ) (Hartree): -268.12771968 
E(PMP3/Aug-CC-pVDZ) (Hartree): -268.16880509 
E(PUHF/Aug-CC-pVDZ) (Hartree): -267.31962029 
E(UHF/Aug-CC-pVDZ) (Hartree): -267.31487155 
E(CCSD(T)/Aug-CC-pVTZ) (Hartree): -268.45157957 
E(CCSD/Aug-CC-pVTZ) (Hartree): -268.40870982 
     T1 diagnostic:  0.023959 
E(MP2/Aug-CC-pVTZ) (Hartree): -268.36125127 
E(MP3/Aug-CC-pVTZ) (Hartree): -268.39599216 
E(PMP2/Aug-CC-pVTZ) (Hartree): -268.36442778 
E(PMP3/Aug-CC-pVTZ) (Hartree): -268.39790331 
E(PUHF/Aug-CC-pVTZ) (Hartree): -267.38505803 
E(UHF/Aug-CC-pVTZ) (Hartree): -267.37995464 
E(UB3LYP/Aug-CC-pVDZ) (Hartree): -268.88836647 
Electronic state : 2-A
Cartesian coordinates (Angs):
     O      -1.832198     -0.556822       0.449383
     O      -1.129118     -0.159148      -0.591151
     C      -0.196532      0.913655      -0.229898
     C       0.985176      0.384203       0.569333
     C       1.862872     -0.606448      -0.200837
     H       0.106065      1.320829      -1.204202
     H      -0.775241      1.658652       0.329332
     H       1.579773      1.258070       0.878645
     H       0.597359     -0.074838       1.489701
     H       2.286056     -0.144230      -1.104894
     H       1.288796     -1.489990      -0.509622
     H       2.698624     -0.949188       0.423594
Rotational constants (GHz):    9.9506000    3.0626700    2.8768000
Vibrational harmonic frequencies (cm-1):
       75.0237                  134.4030                  215.5522            
      287.1733                  428.2291                  539.2087            
      745.3137                  848.4507                  879.1055            
      929.9035                 1046.4573                 1098.4554            
     1146.2688                 1183.3420                 1273.1422            
     1283.9843                 1353.6154                 1369.9738            
     1398.2360                 1456.0249                 1457.4690            
     1474.8276                 1478.4625                 3034.1020            
     3038.8238                 3063.2612                 3081.9719            
     3104.7637                 3116.3168                 3130.7359            
Zero-point correction (Hartree): 0.099493

C3H7OO.pm
------------
E(CCSD(T)/Aug-CC-pVDZ) (Hartree): -268.21412198 
E(CCSD/Aug-CC-pVDZ) (Hartree): -268.18424685 
E(MP2/Aug-CC-pVDZ) (Hartree): -268.12411380 
E(MP3/Aug-CC-pVDZ) (Hartree): -268.16622066 
E(PMP2/Aug-CC-pVDZ) (Hartree): -268.12712123 
E(PMP3/Aug-CC-pVDZ) (Hartree): -268.16806434 
E(PUHF/Aug-CC-pVDZ) (Hartree): -267.31847072 
E(UHF/Aug-CC-pVDZ) (Hartree): -267.31364971 
E(CCSD(T)/Aug-CC-pVTZ) (Hartree): -268.45083686 
E(CCSD/Aug-CC-pVTZ) (Hartree): -268.40787783 
     T1 diagnostic:  0.023752 
E(MP2/Aug-CC-pVTZ) (Hartree): -268.36063404 
E(MP3/Aug-CC-pVTZ) (Hartree): -268.39525414 
E(PMP2/Aug-CC-pVTZ) (Hartree): -268.36385595 
E(PMP3/Aug-CC-pVTZ) (Hartree): -268.39718329 
E(PUHF/Aug-CC-pVTZ) (Hartree): -267.38395424 
E(UHF/Aug-CC-pVTZ) (Hartree): -267.37878122 
E(UB3LYP/Aug-CC-pVDZ) (Hartree): -268.88760103 
Electronic state : 2-A
Cartesian coordinates (Angs):
     O      -1.630974     -0.872028       0.136316
     O      -1.238917      0.254967      -0.423949
     C      -0.201777      0.932482       0.357010
     C       1.185754      0.590544      -0.171754
     C       1.597789     -0.869374       0.032614
     H      -0.428421      1.999432       0.230481
     H      -0.347412      0.630996       1.401157
     H       1.230677      0.856744      -1.238417
     H       1.892691      1.258947       0.345630
     H       0.913339     -1.555321      -0.482694
     H       1.598839     -1.136156       1.098995
     H       2.608816     -1.040064      -0.361306
Rotational constants (GHz):    8.6156300    3.5955300    2.8300100
Vibrational harmonic frequencies (cm-1):
       71.3442                  112.5282                  219.1991            
      305.4476                  432.5755                  511.3676            
      757.1487                  832.5920                  903.4213            
      917.1038                 1051.2107                 1094.4971            
     1146.5964                 1188.9524                 1271.8203            
     1285.4217                 1354.8576                 1367.9884            
     1401.4867                 1452.8601                 1454.5911            
     1472.7904                 1477.1276                 3030.8820            
     3037.7272                 3062.8583                 3071.8522            
     3106.2097                 3118.6279                 3133.9994            
Zero-point correction (Hartree): 0.099431

C3H7OO.pt
------------
E(CCSD(T)/Aug-CC-pVDZ) (Hartree): -268.21458629 
E(CCSD/Aug-CC-pVDZ) (Hartree): -268.18486501 
E(MP2/Aug-CC-pVDZ) (Hartree): -268.12437501 
E(MP3/Aug-CC-pVDZ) (Hartree): -268.16681255 
E(PMP2/Aug-CC-pVDZ) (Hartree): -268.12733799 
E(PMP3/Aug-CC-pVDZ) (Hartree): -268.16863708 
E(PUHF/Aug-CC-pVDZ) (Hartree): -267.31987681 
E(UHF/Aug-CC-pVDZ) (Hartree): -267.31512557 
E(CCSD(T)/Aug-CC-pVTZ) (Hartree): -268.45137279 
E(CCSD/Aug-CC-pVTZ) (Hartree): -268.40857202 
     T1 diagnostic:  0.023896 
E(MP2/Aug-CC-pVTZ) (Hartree): -268.36098890 
E(MP3/Aug-CC-pVTZ) (Hartree): -268.39594327 
E(PMP2/Aug-CC-pVTZ) (Hartree): -268.36416809 
E(PMP3/Aug-CC-pVTZ) (Hartree): -268.39785409 
E(PUHF/Aug-CC-pVTZ) (Hartree): -267.38540205 
E(UHF/Aug-CC-pVTZ) (Hartree): -267.38029599 
E(UB3LYP/Aug-CC-pVDZ) (Hartree): -268.88838086 
Electronic state : 2-A
Cartesian coordinates (Angs):
     O      -2.027897     -0.613575       0.270833
     O      -1.454144      0.408797      -0.330612
     C      -0.108748      0.651340       0.190353
     C       0.885861     -0.361721      -0.357753
     C       2.303390     -0.099882       0.162565
     H       0.114787      1.674182      -0.141697
     H      -0.178200      0.617735       1.285072
     H       0.551768     -1.366647      -0.065208
     H       0.870296     -0.317670      -1.456582
     H       2.345877     -0.165499       1.259442
     H       2.663182      0.897386      -0.130190
     H       3.005604     -0.839685      -0.243593
Rotational constants (GHz):   15.3555500    2.4625200    2.3301200
Vibrational harmonic frequencies (cm-1):
       96.7105                  100.2013                  229.8476            
      266.2311                  370.9257                  553.2404            
      754.8189                  863.2165                  891.9000            
      932.6743                 1044.3700                 1115.8270            
     1151.9853                 1195.3562                 1268.6412            
     1303.1699                 1310.4746                 1380.1741            
     1394.8085                 1459.0955                 1469.3187            
     1474.1065                 1486.6173                 3030.9771            
     3047.0677                 3062.8466                 3083.0010            
     3102.8769                 3110.9756                 3129.5483            
Zero-point correction (Hartree): 0.099513

C3H7OO.tp
------------
E(CCSD(T)/Aug-CC-pVDZ) (Hartree): -268.21411520 
E(CCSD/Aug-CC-pVDZ) (Hartree): -268.18451429 
E(MP2/Aug-CC-pVDZ) (Hartree): -268.12420557 
E(MP3/Aug-CC-pVDZ) (Hartree): -268.16634687 
E(PMP2/Aug-CC-pVDZ) (Hartree): -268.12715209 
E(PMP3/Aug-CC-pVDZ) (Hartree): -268.16816086 
E(PUHF/Aug-CC-pVDZ) (Hartree): -267.31973918 
E(UHF/Aug-CC-pVDZ) (Hartree): -267.31501033 
E(CCSD(T)/Aug-CC-pVTZ) (Hartree): -268.45095042 
E(CCSD/Aug-CC-pVTZ) (Hartree): -268.40827886 
     T1 diagnostic:  0.023875 
E(MP2/Aug-CC-pVTZ) (Hartree): -268.36082740 
E(MP3/Aug-CC-pVTZ) (Hartree): -268.39549453 
E(PMP2/Aug-CC-pVTZ) (Hartree): -268.36399032 
E(PMP3/Aug-CC-pVTZ) (Hartree): -268.39739418 
E(PUHF/Aug-CC-pVTZ) (Hartree): -267.38537489 
E(UHF/Aug-CC-pVTZ) (Hartree): -267.38028979 
E(UB3LYP/Aug-CC-pVDZ) (Hartree): -268.88807709 
Electronic state : 2-A
Cartesian coordinates (Angs):
     O       2.239492     -0.329192       0.116944
     O       1.018856     -0.294409      -0.372963
     C       0.195125      0.722015       0.290489
     C      -1.219971      0.600085      -0.248488
     C      -1.922692     -0.704313       0.141092
     H       0.260956      0.528869       1.369385
     H       0.650857      1.694078       0.061468
     H      -1.783844      1.463549       0.136399
     H      -1.192721      0.709749      -1.342918
     H      -1.990392     -0.804783       1.234246
     H      -1.382980     -1.578420      -0.245973
     H      -2.943430     -0.730957      -0.263016
Rotational constants (GHz):   12.9897000    2.6843200    2.4350000
Vibrational harmonic frequencies (cm-1):
       58.4526                  126.0761                  195.6933            
      293.3072                  378.3060                  515.6875            
      738.6830                  877.6643                  893.2252            
      915.7191                 1059.1181                 1111.7852            
     1143.5772                 1200.6025                 1231.4153            
     1290.3877                 1350.1683                 1379.1026            
     1398.5900                 1454.4635                 1464.9329            
     1477.0551                 1480.1369                 3035.3067            
     3039.4443                 3057.7239                 3075.4813            
     3104.7577                 3117.8410                 3120.4917            
Zero-point correction (Hartree): 0.099294

C3H7OO.tt
------------
E(CCSD(T)/Aug-CC-pVDZ) (Hartree): -268.21392351 
E(CCSD/Aug-CC-pVDZ) (Hartree): -268.18438469 
E(MP2/Aug-CC-pVDZ) (Hartree): -268.12389781 
E(MP3/Aug-CC-pVDZ) (Hartree): -268.16630146 
E(PMP2/Aug-CC-pVDZ) (Hartree): -268.12683688 
E(PMP3/Aug-CC-pVDZ) (Hartree): -268.16811111 
E(PUHF/Aug-CC-pVDZ) (Hartree): -267.32006000 
E(UHF/Aug-CC-pVDZ) (Hartree): -267.31534262 
E(CCSD(T)/Aug-CC-pVTZ) (Hartree): -268.45077412 
E(CCSD/Aug-CC-pVTZ) (Hartree): -268.40816790 
     T1 diagnostic:  0.023835 
E(MP2/Aug-CC-pVTZ) (Hartree): -268.36055946 
E(MP3/Aug-CC-pVTZ) (Hartree): -268.39548031 
E(PMP2/Aug-CC-pVTZ) (Hartree): -268.36371655 
E(PMP3/Aug-CC-pVTZ) (Hartree): -268.39737673 
E(PUHF/Aug-CC-pVTZ) (Hartree): -267.38569349 
E(UHF/Aug-CC-pVTZ) (Hartree): -267.38061859 
E(UB3LYP/Aug-CC-pVDZ) (Hartree): -268.88803880 
Point group : CS
Electronic state : 2-A"
Cartesian coordinates (Angs):
     O       2.218326      1.016500       0.000000
     O       1.404051     -0.017562       0.000000
     C       0.000000      0.399246       0.000000
     C      -0.856855     -0.854442       0.000000
     C      -2.351085     -0.514087       0.000000
     H      -0.150357      1.016035       0.896198
     H      -0.150357      1.016035      -0.896198
     H      -0.607592     -1.459302      -0.883895
     H      -0.607592     -1.459302       0.883895
     H      -2.629754      0.070454      -0.888745
     H      -2.629754      0.070454       0.888745
     H      -2.955970     -1.430180       0.000000
Rotational constants (GHz):   22.9666200    2.1596600    2.0507100
Vibrational harmonic frequencies (cm-1):
       64.0829 (  A")           106.5852 (  A")           199.5823 (  A')     
      231.9042 (  A")           395.9806 (  A')           491.0816 (  A')     
      752.2569 (  A")           878.8000 (  A")           914.3580 (  A')     
      937.4084 (  A')          1049.2931 (  A')          1141.8346 (  A')     
     1145.5160 (  A")          1196.8939 (  A')          1238.3010 (  A")     
     1300.6070 (  A")          1309.5608 (  A')          1388.2462 (  A')     
     1397.5612 (  A')          1469.0912 (  A')          1472.7377 (  A')     
     1475.0893 (  A")          1489.8841 (  A')          3032.2631 (  A')     
     3044.7719 (  A')          3057.1872 (  A')          3077.4412 (  A")     
     3100.4107 (  A")          3112.0681 (  A')          3120.0529 (  A")     
Zero-point correction (Hartree): 0.099307

C3H7OO.1-5Hshift
------------
E(CCSD(T)/Aug-CC-pVDZ) (Hartree): -268.16879236 
E(CCSD/Aug-CC-pVDZ) (Hartree): -268.13525781 
E(MP2/Aug-CC-pVDZ) (Hartree): -268.08351889 
E(MP3/Aug-CC-pVDZ) (Hartree): -268.11951508 
E(PMP2/Aug-CC-pVDZ) (Hartree): -268.08995718 
E(PMP3/Aug-CC-pVDZ) (Hartree): -268.12322889 
E(PUHF/Aug-CC-pVDZ) (Hartree): -267.25168706 
E(UHF/Aug-CC-pVDZ) (Hartree): -267.24246965 
E(CCSD(T)/Aug-CC-pVTZ) (Hartree): -268.40581256 
E(CCSD/Aug-CC-pVTZ) (Hartree): -268.35859993 
     T1 diagnostic:  0.020923 
E(MP2/Aug-CC-pVTZ) (Hartree): -268.32058049 
E(MP3/Aug-CC-pVTZ) (Hartree): -268.34838292 
E(PMP2/Aug-CC-pVTZ) (Hartree): -268.32725421 
E(PMP3/Aug-CC-pVTZ) (Hartree): -268.35220100 
E(PUHF/Aug-CC-pVTZ) (Hartree): -267.31618339 
E(UHF/Aug-CC-pVTZ) (Hartree): -267.30664561 
E(UB3LYP/Aug-CC-pVDZ) (Hartree): -268.84478873 
Electronic state : 2-A
Cartesian coordinates (Angs):
     C      -1.344876     -0.859032       0.020477
     C      -1.141950      0.625414      -0.156083
     C       0.269656      1.058896       0.307601
     O       1.239021      0.267960      -0.371107
     O       1.137685     -1.047497       0.135120
     H      -1.644936     -1.203635       1.014958
     H      -1.810184     -1.407126      -0.802463
     H      -1.873947      1.203178       0.434652
     H      -1.259806      0.908922      -1.209792
     H       0.391455      0.937425       1.394376
     H       0.487912      2.095112       0.017041
     H      -0.001117     -1.249251       0.007157
Rotational constants (GHz):    7.5011300    4.8595600    3.3041800
Vibrational harmonic frequencies (cm-1):
    i1640.4575                  165.1683                  353.8984            
      436.2445                  458.6420                  512.3375            
      626.5644                  815.4741                  867.7836            
      892.8366                  936.1804                 1002.4535            
     1035.9784                 1067.9493                 1099.8364            
     1159.9056                 1200.2256                 1264.4421            
     1327.5996                 1353.4121                 1435.6776            
     1452.7957                 1465.1370                 1557.2973            
     3007.4890                 3039.0313                 3092.5659            
     3098.0979                 3115.7561                 3193.7136            
Zero-point correction (Hartree): 0.093483

#################################################################################
1-propene-3-peroxy B3LYP/6-31G(d,p) (5 d-orbitals) geometry
#################################################################################

C3H5OO.1-5Hshift.Z
------------------
E(CBS-QB3) excl. ZPE (Hartree): -267.24032700 
E(CBS-QB3) inc. ZPE scaled by 0.99 (Hartree): -267.17042200 
E(CCSD(T)/6-31+(d')) (Hartree): -266.84016276 
E(CCSD/6-31+(d')) (Hartree): -266.80784332 
E(MP2/6-31+(d')) (Hartree): -266.76308808 
E(MP2/CBSB3) (Hartree): -267.04892361 
E(MP2/CBSB4) (Hartree): -266.80933439 
E(MP3/6-31+(d')) (Hartree): -266.78450395 
E(MP3/CBSB4) (Hartree): -266.83315408 
E(PMP2/6-31+(d')) (Hartree): -266.77542355 
E(PMP2/CBSB3) (Hartree): -267.06117216 
E(PMP2/CBSB4) (Hartree): -266.82121982 
E(PMP3/6-31+(d')) (Hartree): -266.79317977 
E(PMP3/CBSB4) (Hartree): -266.84150135 
E(PUHF/6-31+(d')) (Hartree): -266.01340731 
E(PUHF/CBSB3) (Hartree): -266.11038486 
E(PUHF/CBSB4) (Hartree): -266.02597361 
E(UB+HF-LYP/CBSB7) (Hartree): -267.64991694 
E(UHF/6-31+(d')) (Hartree): -265.99855567 
E(UHF/CBSB3) (Hartree): -266.09562814 
E(UHF/CBSB4) (Hartree): -266.01166024 
E(UB+HF-LYP/6-31G(d,p)) (Hartree): -267.57563960 
Electronic state : 2-A
Cartesian coordinates (Angs):
     C      -1.438074     -0.705950      -0.013092
     C      -1.048851      0.696415       0.017222
     C       0.250489      1.086640       0.075139
     O       1.309776      0.268817      -0.066851
     O       1.007112     -1.108250       0.013361
     H      -1.411110     -1.254925       0.931781
     H      -2.326487     -0.940453      -0.599248
     H      -1.778790      1.483139      -0.167252
     H       0.583912      2.119395       0.077246
     H      -0.184014     -1.154320      -0.290219
Rotational constants (GHz):    8.6198800    5.3299200    3.3591100
Vibrational harmonic frequencies (cm-1):
    i1728.9911                  191.0321                  450.9582            
      481.6266                  503.0147                  606.3713            
      739.9828                  827.5293                  902.6623            
      918.8636                  990.8359                 1023.0984            
     1065.1692                 1160.9666                 1259.3771            
     1284.4690                 1414.7902                 1493.9698            
     1577.0070                 1641.3654                 3088.9851            
     3158.8726                 3172.5088                 3225.9298            
Zero-point correction (Hartree): 0.071032

C3H5OO.5yl
----------
E(UB+HF-LYP/6-31G(d,p)) (Hartree): -267.65026953 
Electronic state : 2-A
Cartesian coordinates (Angs):
     C      -0.552315      1.494771      -0.000366
     C      -1.416957      0.471380       0.000330
     C      -1.002083     -0.947057       0.000080
     O       0.148322     -1.359498      -0.000367
     O       2.440295      0.299052       0.000305
     H       0.524252      1.340616      -0.001179
     H      -0.899440      2.523532      -0.000160
     H      -2.490129      0.649642       0.001072
     H      -1.836889     -1.676460       0.000327
     H       1.821397     -0.468327       0.000165
Rotational constants (GHz):    6.0998500    3.3827900    2.1760300
Vibrational harmonic frequencies (cm-1):
       49.2950                   77.5050                  175.7797            
      193.6953                  301.7040                  453.4448            
      518.2489                  548.5108                  693.5694            
      946.9369                 1017.0167                 1034.4932            
     1045.2103                 1079.5740                 1323.2496            
     1446.4048                 1458.9520                 1678.8949            
     1789.7745                 2954.4271                 3151.1151            
     3181.1837                 3248.2168                 3582.3995            
Zero-point correction (Hartree): 0.072787

C3H5OO.cE
---------
E(UB+HF-LYP/6-31G(d,p)) (Hartree): -267.61916049 
Electronic state : 2-A
Cartesian coordinates (Angs):
     O       1.900354     -0.717077       0.000212
     O       1.455067      0.533461      -0.000106
     C       0.071666      0.672668      -0.000026
     C      -0.809818     -0.329238      -0.000346
     C      -2.292703     -0.122577       0.000138
     H      -0.171051      1.729891       0.000243
     H      -0.420854     -1.343104      -0.000646
     H      -2.561850      0.937753       0.000299
     H      -2.752579     -0.590376      -0.879120
     H      -2.751899     -0.590360       0.879782
Rotational constants (GHz):   18.2702900    2.7275400    2.4085100
Vibrational harmonic frequencies (cm-1):
      142.5150                  204.2930                  233.8436            
      299.8285                  388.8202                  690.1193            
      809.0875                  907.1921                  960.4451            
     1024.8824                 1064.8849                 1135.3042            
     1172.2517                 1297.3026                 1342.3914            
     1430.2192                 1490.1125                 1500.6749            
     1683.3172                 3034.6757                 3085.9724            
     3122.6441                 3210.9308                 3226.9662            
Zero-point correction (Hartree): 0.076224

C3H5OO.cZ
---------
E(UB+HF-LYP/6-31G(d,p)) (Hartree): -267.61551547 
Electronic state : 2-A
Cartesian coordinates (Angs):
     O      -1.187545     -1.082573       0.071213
     O      -1.398866      0.223778      -0.083693
     C      -0.283732      1.034885       0.016544
     C       1.010923      0.690357       0.035780
     C       1.641151     -0.669064      -0.040245
     H      -0.622969      2.064648       0.046781
     H       1.683899      1.541259       0.118795
     H       1.073788     -1.344952      -0.681580
     H       2.668315     -0.589312      -0.407542
     H       1.678199     -1.138351       0.950902
Rotational constants (GHz):    9.1488200    4.3843500    3.0275900
Vibrational harmonic frequencies (cm-1):
       64.9317                  127.8176                  269.7605            
      387.5383                  461.3118                  727.0355            
      796.5869                  884.4316                  941.5369            
      996.8720                 1052.3941                 1093.3014            
     1174.1108                 1291.2535                 1404.5608            
     1436.1738                 1486.8256                 1492.8359            
     1672.8684                 3046.0337                 3105.7145            
     3153.0350                 3176.0735                 3228.2751            
Zero-point correction (Hartree): 0.076253

C3H5OO.tE
---------
E(UB+HF-LYP/6-31G(d,p)) (Hartree): -267.62061492 
Electronic state : 2-A
Cartesian coordinates (Angs):
     O      -2.357938      0.323778       0.000356
     O      -1.290288     -0.470963      -0.000378
     C      -0.100213      0.234962      -0.000236
     C       1.055815     -0.432984       0.000217
     C       2.398555      0.230707       0.000048
     H      -0.235065      1.311350      -0.000444
     H       1.017957     -1.520473       0.000602
     H       2.312967      1.320968      -0.001217
     H       2.982243     -0.064301       0.880633
     H       2.982771     -0.066181      -0.879571
Rotational constants (GHz):   31.2930500    2.2665000    2.1413900
Vibrational harmonic frequencies (cm-1):
      122.0484                  209.0793                  211.9468            
      269.5661                  475.4406                  530.6605            
      815.3636                  942.0452                  967.6931            
     1061.4265                 1063.7619                 1143.8725            
     1194.5735                 1298.1063                 1313.3553            
     1430.6521                 1489.7624                 1502.0238            
     1710.7884                 3036.0374                 3087.4446            
     3126.8876                 3182.5323                 3228.6013            
Zero-point correction (Hartree): 0.076122

C3H5OO.tZ
---------
E(CBS-QB3) excl. ZPE (Hartree): -267.28368200 
E(CBS-QB3) inc. ZPE scaled by 0.99 (Hartree): -267.20858400 
E(CCSD(T)/6-31+(d')) (Hartree): -266.89836552 
E(CCSD/6-31+(d')) (Hartree): -266.87115453 
E(MP2/6-31+(d')) (Hartree): -266.81998967 
E(MP2/CBSB3) (Hartree): -267.09503540 
E(MP2/CBSB4) (Hartree): -266.85869209 
E(MP3/6-31+(d')) (Hartree): -266.84930125 
E(MP3/CBSB4) (Hartree): -266.89105857 
E(PMP2/6-31+(d')) (Hartree): -266.82570318 
E(PMP2/CBSB3) (Hartree): -267.10099476 
E(PMP2/CBSB4) (Hartree): -266.86437143 
E(PMP3/6-31+(d')) (Hartree): -266.85344913 
E(PMP3/CBSB4) (Hartree): -266.89517861 
E(PUHF/6-31+(d')) (Hartree): -266.09449939 
E(PUHF/CBSB3) (Hartree): -266.18624143 
E(PUHF/CBSB4) (Hartree): -266.10194601 
E(UB+HF-LYP/CBSB7) (Hartree): -267.69506929 
E(UHF/6-31+(d')) (Hartree): -266.08761296 
E(UHF/CBSB3) (Hartree): -266.17895610 
E(UHF/CBSB4) (Hartree): -266.09509646 
E(UB+HF-LYP/6-31G(d,p)) (Hartree): -267.62065237 
Electronic state : 2-A
Cartesian coordinates (Angs):
     O      -2.237514     -0.211325      -0.000223
     O      -0.926943     -0.444245       0.000261
     C      -0.178117      0.719977       0.000106
     C       1.157182      0.660071      -0.000073
     C       1.984514     -0.589989      -0.000084
     H      -0.784783      1.617949       0.000149
     H       1.677059      1.614905      -0.000114
     H       1.365452     -1.488651      -0.001398
     H       2.639258     -0.619310      -0.879374
     H       2.637188     -0.620680       0.880742
Rotational constants (GHz):   17.2879500    2.8425700    2.4785600
Vibrational harmonic frequencies (cm-1):
      115.9376                  142.1775                  203.3289            
      423.2365                  450.4653                  656.1641            
      752.9697                  943.8323                  953.6535            
      981.0499                 1061.7939                 1142.8366            
     1198.5693                 1250.8318                 1378.2855            
     1429.9022                 1496.8935                 1498.4624            
     1709.3448                 3041.6440                 3090.4754            
     3153.0595                 3189.1084                 3241.1125            
Zero-point correction (Hartree): 0.076330

******************************************
1-butylperoxy M05-2X/6-311G(d,p) geometry
******************************************

C4H9OO.ppt
------------------
E(CCSD(T)/Aug-CC-pVDZ) (Hartree): -307.41881454 
E(CCSD/Aug-CC-pVDZ) (Hartree): -307.38383049 
     T1 diagnostic:  0.022065 
E(MP2/Aug-CC-pVDZ) (Hartree): -307.31188587 
E(MP3/Aug-CC-pVDZ) (Hartree): -307.36523399 
E(PMP2/Aug-CC-pVDZ) (Hartree): -307.31484087 
E(PMP3/Aug-CC-pVDZ) (Hartree): -307.36702076 
E(PUHF/Aug-CC-pVDZ) (Hartree): -306.35951461 
E(UHF/Aug-CC-pVDZ) (Hartree): -306.35470830 
E(CCSD(T)/Aug-CC-pVTZ) (Hartree): -307.69407735 
E(CCSD/Aug-CC-pVTZ) (Hartree): -307.64390169 
     T1 diagnostic:  0.021450 
E(MP2/Aug-CC-pVTZ) (Hartree): -307.58736160 
E(MP3/Aug-CC-pVTZ) (Hartree): -307.63174754 
E(PMP2/Aug-CC-pVTZ) (Hartree): -307.59052932 
E(PMP3/Aug-CC-pVTZ) (Hartree): -307.63361691 
E(PUHF/Aug-CC-pVTZ) (Hartree): -306.43470191 
E(UHF/Aug-CC-pVTZ) (Hartree): -306.42954495 
E(UM052X/6-311G(d,p)) (Hartree): -308.18823573 
Electronic state : 2-A
Cartesian coordinates (Angs):
     O       2.046205     -0.983042      -0.367586
     O       1.672887     -0.162731       0.566733
     C       0.975651      0.981681       0.006350
     C      -0.366765      0.563562      -0.555759
     C      -1.305324     -0.005755       0.505069
     C      -2.639022     -0.440502      -0.094763
     H       0.876249      1.663954       0.848615
     H       1.628930      1.407259      -0.752552
     H      -0.822322      1.437417      -1.028765
     H      -0.191454     -0.174533      -1.340620
     H      -0.822194     -0.854988       0.990406
     H      -1.474074      0.747432       1.279102
     H      -2.487202     -1.210663      -0.852166
     H      -3.144491      0.401529      -0.570372
     H      -3.303417     -0.845136       0.667795
Rotational constants (GHz):    7.6143700    1.7754900    1.6512100
Vibrational harmonic frequencies (cm-1):
       72.1586                   80.4695                  171.3397            
      240.2261                  256.2731                  321.9502            
      467.7927                  576.5425                  751.4058            
      840.0634                  861.9032                  938.6970            
      985.1853                 1046.3398                 1081.3021            
     1148.2426                 1191.2457                 1242.4057            
     1285.7685                 1310.3439                 1344.9860            
     1355.2959                 1414.2174                 1424.8228            
     1431.8228                 1499.3068                 1509.8070            
     1515.3072                 1522.4174                 1529.1680            
     3082.6369                 3085.4995                 3091.4040            
     3120.5651                 3131.3026                 3140.4998            
     3154.5354                 3160.2934                 3192.5134            
Zero-point correction (Hartree): 0.131168

C4H9OO.1-5Hshift.R
------------------
E(CCSD(T)/Aug-CC-pVDZ) (Hartree): -307.37642294 
E(CCSD/Aug-CC-pVDZ) (Hartree): -307.33719770 
     T1 diagnostic:  0.020794 
E(MP2/Aug-CC-pVDZ) (Hartree): -307.27278019 
E(MP3/Aug-CC-pVDZ) (Hartree): -307.32004480 
E(PMP2/Aug-CC-pVDZ) (Hartree): -307.27984838 
E(PMP3/Aug-CC-pVDZ) (Hartree): -307.32406054 
E(PUHF/Aug-CC-pVDZ) (Hartree): -306.29416515 
E(UHF/Aug-CC-pVDZ) (Hartree): -306.28401345 
E(CCSD(T)/Aug-CC-pVTZ) (Hartree): -307.65188077 
E(CCSD/Aug-CC-pVTZ) (Hartree): -307.59687050 
     T1 diagnostic:  0.019939 
E(MP2/Aug-CC-pVTZ) (Hartree): -307.54861263 
E(MP3/Aug-CC-pVTZ) (Hartree): -307.58626077 
E(PMP2/Aug-CC-pVTZ) (Hartree): -307.55593113 
E(PMP3/Aug-CC-pVTZ) (Hartree): -307.59039054 
E(PUHF/Aug-CC-pVTZ) (Hartree): -306.36841096 
E(UHF/Aug-CC-pVTZ) (Hartree): -306.35792312 
E(UM052X/6-311G(d,p)) (Hartree): -308.14568751 
Electronic state : 2-A
Cartesian coordinates (Angs):
     C      -1.066355      0.008597      -0.615939
     C      -0.190922      1.203027      -0.322417
     C       1.014195      0.794032       0.541100
     O       1.692744     -0.256706      -0.122026
     O       0.876854     -1.376818      -0.050689
     C      -2.069597     -0.371730       0.442335
     H      -1.425683     -0.061291      -1.638666
     H      -0.757416      1.971737       0.213885
     H       0.188975      1.638069      -1.245401
     H       0.703210      0.451162       1.529082
     H       1.735217      1.603488       0.632788
     H      -0.133917     -0.946823      -0.533401
     H      -2.859794      0.382312       0.509386
     H      -1.592936     -0.444259       1.420585
     H      -2.538376     -1.329765       0.222995
Rotational constants (GHz):    5.5126700    2.7942000    2.2042600
Vibrational harmonic frequencies (cm-1):
    i1779.2285                  135.3201                  171.9377            
      190.2397                  344.3295                  407.8414            
      484.9637                  525.1130                  656.1130            
      798.0448                  852.4340                  883.8070            
      968.7785                  972.8625                 1022.8998            
     1075.5227                 1114.2447                 1140.0993            
     1174.7564                 1206.9081                 1267.6679            
     1295.6419                 1363.3829                 1368.5654            
     1404.6693                 1430.2119                 1485.0109            
     1504.3388                 1506.9486                 1515.6002            
     1580.3995                 3065.1467                 3068.0743            
     3110.4747                 3132.4092                 3149.9626            
     3163.0797                 3180.1604                 3184.7238            
Zero-point correction (Hartree): 0.125078

C4H9OO.1-5Hshift.S
------------------
E(CCSD(T)/Aug-CC-pVDZ) (Hartree): -307.37625755 
E(CCSD/Aug-CC-pVDZ) (Hartree): -307.33715523 
     T1 diagnostic:  0.020561 
E(MP2/Aug-CC-pVDZ) (Hartree): -307.27261866 
E(MP3/Aug-CC-pVDZ) (Hartree): -307.32006307 
E(PMP2/Aug-CC-pVDZ) (Hartree): -307.27969060 
E(PMP3/Aug-CC-pVDZ) (Hartree): -307.32407478 
E(PUHF/Aug-CC-pVDZ) (Hartree): -306.29484857 
E(UHF/Aug-CC-pVDZ) (Hartree): -306.28468060 
E(CCSD(T)/Aug-CC-pVTZ) (Hartree): -307.65162420 
E(CCSD/Aug-CC-pVTZ) (Hartree): -307.59674965 
     T1 diagnostic:  0.019727 
E(MP2/Aug-CC-pVTZ) (Hartree): -307.54835905 
E(MP3/Aug-CC-pVTZ) (Hartree): -307.58618724 
E(PMP2/Aug-CC-pVTZ) (Hartree): -307.55568029 
E(PMP3/Aug-CC-pVTZ) (Hartree): -307.59031254 
E(PUHF/Aug-CC-pVTZ) (Hartree): -306.36909981 
E(UHF/Aug-CC-pVTZ) (Hartree): -306.35859638 
E(UM052X/6-311G(d,p)) (Hartree): -308.14507561 
Electronic state : 2-A
Cartesian coordinates (Angs):
     C      -1.048855      0.031203       0.487713
     C      -0.202942      1.173503      -0.022075
     C       1.292365      0.852904       0.112576
     O       1.531096     -0.383879      -0.536361
     O       0.959274     -1.373121       0.252517
     H      -1.177449      0.023341       1.568450
     C      -2.281729     -0.323385      -0.300960
     H      -0.416222      2.094983       0.527932
     H      -0.417546      1.349763      -1.076952
     H       1.591551      0.770290       1.158577
     H       1.910112      1.585440      -0.402713
     H      -0.161929     -0.957966       0.352957
     H      -2.030020     -0.505133      -1.346234
     H      -3.002958      0.500134      -0.272235
     H      -2.771539     -1.210204       0.097441
Rotational constants (GHz):    5.7389900    2.5991900    2.0362800
Vibrational harmonic frequencies (cm-1):
    i1772.5476                   89.0743                  191.4322            
      207.7195                  370.2107                  396.1935            
      458.4012                  500.4034                  607.5250            
      811.2210                  864.4173                  887.1979            
      965.9207                  991.8229                 1010.8153            
     1106.6432                 1116.6639                 1148.8838            
     1184.5321                 1213.2998                 1247.4496            
     1293.1400                 1338.8784                 1397.6211            
     1400.3070                 1428.2232                 1485.8693            
     1505.0770                 1507.6324                 1510.7138            
     1585.9338                 3059.5602                 3074.6359            
     3108.9729                 3128.9703                 3133.0837            
     3154.1757                 3172.9247                 3183.0176            
Zero-point correction (Hartree): 0.124931

C4H9OO.1-6Hshift.a
------------------
E(CCSD(T)/Aug-CC-pVDZ) (Hartree): -307.37410347 
E(CCSD/Aug-CC-pVDZ) (Hartree): -307.33560899 
     T1 diagnostic:  0.018627 
E(MP2/Aug-CC-pVDZ) (Hartree): -307.27098396 
E(MP3/Aug-CC-pVDZ) (Hartree): -307.31924904 
E(PMP2/Aug-CC-pVDZ) (Hartree): -307.27781721 
E(PMP3/Aug-CC-pVDZ) (Hartree): -307.32310124 
E(PUHF/Aug-CC-pVDZ) (Hartree): -306.29459469 
E(UHF/Aug-CC-pVDZ) (Hartree): -306.28470014 
E(CCSD(T)/Aug-CC-pVTZ) (Hartree): -307.64882796 
E(CCSD/Aug-CC-pVTZ) (Hartree): -307.59461307 
     T1 diagnostic:  0.017781 
E(MP2/Aug-CC-pVTZ) (Hartree): -307.54613384 
E(MP3/Aug-CC-pVTZ) (Hartree): -307.58480045 
E(PMP2/Aug-CC-pVTZ) (Hartree): -307.55320703 
E(PMP3/Aug-CC-pVTZ) (Hartree): -307.58876087 
E(PUHF/Aug-CC-pVTZ) (Hartree): -306.36827421 
E(UHF/Aug-CC-pVTZ) (Hartree): -306.35805174 
E(UM052X/6-311G(d,p)) (Hartree): -308.14348309 
Electronic state : 2-A
Cartesian coordinates (Angs):
     O       0.993853     -1.296177      -0.362179
     H      -0.121542     -1.414600      -0.022539
     C      -1.370827     -1.051846       0.292913
     O       1.453567     -0.235663       0.405963
     C      -1.487417      0.314109      -0.332125
     C       0.993282      0.983884      -0.175122
     C      -0.446151      1.306720       0.200510
     H      -1.325257     -1.071651       1.379024
     H      -1.987686     -1.834623      -0.137111
     H      -1.389843      0.227241      -1.416924
     H      -2.489093      0.712080      -0.138860
     H       1.667047      1.741905       0.222770
     H       1.121305      0.914989      -1.256874
     H      -0.671599      2.303045      -0.186556
     H      -0.516019      1.359130       1.289750
Rotational constants (GHz):    4.7143700    3.4356000    2.2581500
Vibrational harmonic frequencies (cm-1):
    i1953.9309                  151.4286                  188.0604            
      318.7676                  349.2087                  438.1226            
      523.2557                  567.8512                  632.4005            
      804.4300                  826.1741                  885.0401            
      949.8208                  973.3414                 1011.3425            
     1052.2364                 1103.7626                 1127.3801            
     1171.1327                 1220.9944                 1274.0758            
     1281.5950                 1335.8889                 1385.8050            
     1410.8582                 1425.5802                 1466.7408            
     1488.1010                 1491.4687                 1495.1240            
     1504.0037                 3060.3153                 3085.4599            
     3103.1577                 3108.1840                 3130.4318            
     3142.5498                 3164.8756                 3231.0770            
Zero-point correction (Hartree): 0.125026

#################################################################################
1-butylperoxy (M06-2X/aug-cc-pVTZ geometry)
#################################################################################

C4H9OO.1-5Hshift.R
------------------
E(CCSD(T)/Aug-CC-pVTZ) (Hartree): -307.65176880 
E(CCSD/Aug-CC-pVTZ) (Hartree): -307.59682202 
     T1 diagnostic:  0.020072 
E(MP2/Aug-CC-pVTZ) (Hartree): -307.54847956 
E(MP3/Aug-CC-pVTZ) (Hartree): -307.58619012 
E(PMP2/Aug-CC-pVTZ) (Hartree): -307.55581672 
E(PMP3/Aug-CC-pVTZ) (Hartree): -307.59032988 
E(PUHF/Aug-CC-pVTZ) (Hartree): -306.36866765 
E(UHF/Aug-CC-pVTZ) (Hartree): -306.35815342 
E(UM062X/Aug-CC-pVTZ) (Hartree): -308.09560926 
Electronic state : 2-A
Cartesian coordinates (Angs):
     C      -1.066608     -0.005748      -0.610865
     C      -0.200676      1.194668      -0.328182
     C       1.009701      0.800916       0.533957
     O       1.697983     -0.245506      -0.115794
     O       0.899004     -1.375338      -0.047121
     C      -2.080300     -0.371795       0.438755
     H      -1.413271     -0.093782      -1.636982
     H      -0.766587      1.962866       0.209417
     H       0.171309      1.632006      -1.253206
     H       0.701109      0.469957       1.528103
     H       1.722904      1.618885       0.620125
     H      -0.127287     -0.954349      -0.510072
     H      -2.870798      0.383291       0.488998
     H      -1.616578     -0.428613       1.424660
     H      -2.549400     -1.331757       0.230290
Rotational constants (GHz):    5.5405500    2.7747000    2.1921900
Vibrational harmonic frequencies (cm-1):
    i1846.2826                  133.1563                  173.9012            
      194.2001                  342.6942                  406.9738            
      484.3219                  519.2951                  651.5673            
      785.4464                  847.8383                  879.7264            
      961.2810                  973.2423                 1015.6712            
     1066.5239                 1120.8295                 1131.4351            
     1164.8689                 1188.1777                 1246.0131            
     1281.0374                 1347.2416                 1353.4400            
     1387.7503                 1411.4750                 1469.0631            
     1484.8061                 1488.8398                 1495.4487            
     1576.7673                 3036.4358                 3038.9031            
     3068.4769                 3102.9579                 3120.2438            
     3135.4529                 3142.6768                 3148.8385            
Zero-point correction (Hartree): 0.123880

C4H9OO.1-5Hshift.S
------------------
E(UM062X/Aug-CC-pVTZ) (Hartree): -308.09506184 
Electronic state : 2-A
Cartesian coordinates (Angs):
     C      -1.050151      0.028752       0.482222
     C      -0.206830      1.169568      -0.026396
     C       1.287805      0.854172       0.114755
     O       1.541365     -0.377966      -0.527286
     O       0.964578     -1.375244       0.243786
     H      -1.172204      0.019474       1.564446
     C      -2.286759     -0.324642      -0.295672
     H      -0.419344      2.093082       0.520535
     H      -0.419726      1.348212      -1.081285
     H       1.583324      0.783784       1.163893
     H       1.904604      1.590442      -0.397969
     H      -0.157975     -0.958458       0.351796
     H      -2.045326     -0.506987      -1.343222
     H      -3.008232      0.498696      -0.264971
     H      -2.777050     -1.209662       0.105323
Rotational constants (GHz):    5.7626700    2.5913700    2.0290300
Vibrational harmonic frequencies (cm-1):
    i1845.1747                   88.1312                  186.7039            
      205.1376                  369.1808                  390.0818            
      455.7667                  498.9629                  604.5894            
      800.3174                  859.4842                  880.6537            
      965.0603                  986.8412                 1003.1737            
     1099.9981                 1117.7643                 1140.5746            
     1175.4610                 1197.8818                 1229.7470            
     1279.3340                 1325.2057                 1380.3628            
     1385.5342                 1410.8966                 1470.7287            
     1486.0997                 1489.1027                 1491.8289            
     1579.5930                 3031.4702                 3044.0572            
     3066.2919                 3099.6003                 3103.3981            
     3118.6707                 3140.4917                 3145.8486            
Zero-point correction (Hartree): 0.123714

C4H9OO.1-6Hshift.a
------------------
E(CCSD(T)/Aug-CC-pVTZ) (Hartree): -307.64873027 
E(CCSD/Aug-CC-pVTZ) (Hartree): -307.59460634 
     T1 diagnostic:  0.017791 
E(MP2/Aug-CC-pVTZ) (Hartree): -307.54610649 
E(MP3/Aug-CC-pVTZ) (Hartree): -307.58482544 
E(PMP2/Aug-CC-pVTZ) (Hartree): -307.55315695 
E(PMP3/Aug-CC-pVTZ) (Hartree): -307.58877164 
E(PUHF/Aug-CC-pVTZ) (Hartree): -306.36858834 
E(UHF/Aug-CC-pVTZ) (Hartree): -306.35839427 
E(UM062X/Aug-CC-pVTZ) (Hartree): -308.09304551 
Electronic state : 2-A
Cartesian coordinates (Angs):
     O       1.017534     -1.291330      -0.349385
     H      -0.102272     -1.407149      -0.024759
     C      -1.363180     -1.066268       0.283384
     O       1.465002     -0.214032       0.397785
     C      -1.498203      0.302421      -0.325508
     C       0.977216      0.991392      -0.179642
     C      -0.462087      1.297792       0.204411
     H      -1.324287     -1.099453       1.369926
     H      -1.962389     -1.856884      -0.157761
     H      -1.411170      0.227645      -1.412294
     H      -2.501646      0.691494      -0.123134
     H       1.642425      1.762536       0.209681
     H       1.099197      0.929691      -1.263584
     H      -0.695259      2.294855      -0.175267
     H      -0.527351      1.348137       1.294124
Rotational constants (GHz):    4.7309200    3.4176000    2.2471500
Vibrational harmonic frequencies (cm-1):
    i1938.3004                  153.7394                  193.5402            
      319.7216                  352.2894                  438.0682            
      518.7821                  563.9327                  625.7712            
      795.4978                  820.5837                  880.8921            
      947.1283                  962.5352                 1010.4289            
     1048.6422                 1095.5220                 1128.8816            
     1161.1938                 1203.2124                 1255.8794            
     1267.0004                 1321.5592                 1370.1482            
     1394.8280                 1408.4537                 1451.5835            
     1472.0832                 1477.1456                 1479.2405            
     1486.3719                 3030.9079                 3055.3898            
     3062.9264                 3077.2346                 3101.4296            
     3106.5160                 3123.2426                 3195.2854            
Zero-point correction (Hartree): 0.123836

C4H9OO.1-6Hshift.b
------------------
E(UM062X/Aug-CC-pVTZ) (Hartree): -308.09168214 
Electronic state : 2-A
Cartesian coordinates (Angs):
     O       0.843690     -1.349002       0.391422
     H      -0.325404     -1.337908       0.257875
     C      -1.569094     -0.869340       0.040909
     O       1.253501     -0.432231      -0.560797
     C      -1.323744      0.552696      -0.393665
     C       1.167350      0.876601      -0.008860
     C      -0.242897      1.223914       0.465299
     H      -2.006496     -0.979767       1.030661
     H      -1.984299     -1.550743      -0.694958
     H      -1.031830      0.580203      -1.444160
     H      -2.258209      1.115881      -0.310825
     H       1.897777      0.981410       0.795723
     H       1.462713      1.512691      -0.844220
     H      -0.348431      2.308615       0.439175
     H      -0.373045      0.916255       1.503634
Rotational constants (GHz):    4.7196200    3.4958400    2.3787400
Vibrational harmonic frequencies (cm-1):
    i1940.6105                  136.0808                  254.9319            
      279.4997                  366.6546                  426.8153            
      470.3664                  595.5646                  623.8967            
      789.7696                  853.3698                  870.8884            
      954.3205                  988.6001                 1016.7022            
     1051.6618                 1103.6367                 1128.0909            
     1149.0087                 1188.2923                 1243.2407            
     1272.8880                 1303.7585                 1351.7822            
     1389.8772                 1402.4227                 1454.8870            
     1479.3479                 1489.8375                 1496.9671            
     1501.7673                 3040.1814                 3064.3218            
     3076.3280                 3100.1480                 3108.0546            
     3110.1795                 3127.1054                 3196.2957            
Zero-point correction (Hartree): 0.124063

C4H9OO.pmm
----------
E(UM062X/Aug-CC-pVTZ) (Hartree): -308.13735234 
Electronic state : 2-A
Cartesian coordinates (Angs):
     O      -1.412870     -1.271780      -0.149789
     O      -1.696389     -0.005312      -0.203924
     C      -0.803612      0.783325       0.612911
     C       0.412593      1.210086      -0.187064
     C       1.295956      0.060949      -0.667340
     C       1.893126     -0.763719       0.466643
     H      -1.398249      1.643280       0.916455
     H      -0.549572      0.181065       1.482670
     H       0.073238      1.802971      -1.038253
     H       0.994821      1.878577       0.453559
     H       0.720570     -0.588162      -1.329318
     H       2.098227      0.486596      -1.272245
     H       1.121915     -1.317126       1.000846
     H       2.415517     -0.125307       1.181960
     H       2.609233     -1.489006       0.083128
Rotational constants (GHz):    5.2776600    2.5682700    2.0677500
Vibrational harmonic frequencies (cm-1):
       89.3758                  103.8734                  159.6201            
      258.0765                  268.9148                  389.5250            
      466.7070                  554.1649                  751.3444            
      827.9821                  857.7323                  935.1122            
      997.1660                 1003.7315                 1092.2608            
     1133.9643                 1156.0032                 1242.6385            
     1262.4722                 1309.8908                 1335.0014            
     1370.1642                 1394.0854                 1401.8704            
     1416.6440                 1474.6587                 1488.6967            
     1495.8233                 1504.4128                 1519.8837            
     3053.4724                 3057.4528                 3068.0984            
     3096.3117                 3099.7269                 3106.9300            
     3127.9742                 3140.3114                 3159.1265            
Zero-point correction (Hartree): 0.130246

C4H9OO.pmt
----------
E(UM062X/Aug-CC-pVTZ) (Hartree): -308.13727080 
Electronic state : 2-A
Cartesian coordinates (Angs):
     O      -1.832508     -1.168512       0.123463
     O      -1.771069     -0.015492      -0.471293
     C      -1.015665      0.950149       0.293037
     C       0.446774      0.916593      -0.101608
     C       1.152337     -0.389747       0.240189
     C       2.628889     -0.345669      -0.131120
     H      -1.474524      1.908219       0.054049
     H      -1.166382      0.710931       1.344692
     H       0.528936      1.117395      -1.172676
     H       0.939460      1.747578       0.411218
     H       1.039038     -0.591001       1.308005
     H       0.663308     -1.214815      -0.279137
     H       3.142806      0.455748       0.401744
     H       2.754846     -0.166977      -1.199873
     H       3.127127     -1.282995       0.111642
Rotational constants (GHz):    7.1526600    1.9212300    1.6384200
Vibrational harmonic frequencies (cm-1):
       84.2437                  104.5171                  125.6188            
      239.1576                  249.1450                  334.2770            
      476.4992                  545.7643                  741.3859            
      837.6117                  855.1953                  942.7611            
      984.7127                 1037.4121                 1080.4222            
     1135.1077                 1179.4335                 1247.6137            
     1266.9163                 1312.4258                 1334.4444            
     1349.3310                 1395.4685                 1411.2249            
     1415.5332                 1475.0972                 1486.2441            
     1494.5179                 1504.4921                 1511.1927            
     3049.9828                 3057.4796                 3064.2515            
     3084.1868                 3094.2510                 3106.1276            
     3127.5574                 3137.5322                 3153.4036            
Zero-point correction (Hartree): 0.129930

C4H9OO.ppm
----------
E(UM062X/Aug-CC-pVTZ) (Hartree): -308.13635839 
Electronic state : 2-A
Cartesian coordinates (Angs):
     O      -1.929052     -0.669590       0.604721
     O      -1.306727     -0.430501      -0.507188
     C      -0.727476      0.897735      -0.515122
     C       0.409412      1.031859       0.478582
     C       1.709095      0.350913       0.058733
     C       1.598404     -1.161367      -0.105004
     H      -0.393305      1.030103      -1.544349
     H      -1.539255      1.589570      -0.296395
     H       0.586668      2.099864       0.619988
     H       0.060342      0.641855       1.437108
     H       2.059261      0.797181      -0.875968
     H       2.468647      0.578429       0.808556
     H       0.947652     -1.429362      -0.936220
     H       1.182450     -1.619480       0.793499
     H       2.577160     -1.602262      -0.289614
Rotational constants (GHz):    5.5706300    2.4430100    2.0257400
Vibrational harmonic frequencies (cm-1):
       56.3203                  101.7025                  169.2505            
      265.1158                  313.1278                  320.3442            
      464.5278                  554.7050                  782.1967            
      817.7523                  856.9861                  937.1794            
      965.2265                 1014.2822                 1098.4621            
     1115.9826                 1179.3762                 1238.2090            
     1280.6853                 1296.9795                 1328.3167            
     1377.6680                 1390.0009                 1405.0255            
     1422.5600                 1476.5589                 1486.0219            
     1496.4297                 1504.7191                 1511.3515            
     3049.8317                 3063.8580                 3065.2919            
     3085.8689                 3090.1391                 3110.0505            
     3131.7038                 3141.3980                 3145.7935            
Zero-point correction (Hartree): 0.130108

C4H9OO.ppp
----------
E(UM062X/Aug-CC-pVTZ) (Hartree): -308.13732575 
Electronic state : 2-A
Cartesian coordinates (Angs):
     O       2.142212     -0.269440      -0.658337
     O       1.328757     -0.697868       0.257311
     C       0.630138      0.395689       0.896758
     C      -0.313851      1.082426      -0.069264
     C      -1.301611      0.135392      -0.747697
     C      -2.156346     -0.660704       0.231647
     H       0.106984     -0.079630       1.724373
     H       1.385207      1.078942       1.282246
     H      -0.855170      1.843140       0.499412
     H       0.280641      1.602822      -0.820151
     H      -1.945706      0.727654      -1.398796
     H      -0.752783     -0.549320      -1.396110
     H      -2.650888     -0.000989       0.947429
     H      -1.557989     -1.378317       0.793337
     H      -2.928027     -1.222655      -0.292191
Rotational constants (GHz):    6.4987300    2.0672000    2.0220200
Vibrational harmonic frequencies (cm-1):
       43.7603                   96.0703                  183.2490            
      237.8623                  287.4200                  376.3038            
      465.6179                  588.3279                  732.5815            
      828.6905                  853.8710                  940.4516            
      981.0995                 1014.1240                 1089.4576            
     1131.8583                 1163.5629                 1240.3636            
     1269.2457                 1301.9007                 1325.8656            
     1372.5671                 1391.6374                 1406.8922            
     1418.2553                 1477.8704                 1492.0044            
     1497.1199                 1505.5581                 1518.4352            
     3056.4152                 3061.0838                 3071.6066            
     3096.8403                 3102.9149                 3115.8611            
     3127.3602                 3136.3562                 3155.4687            
Zero-point correction (Hartree): 0.130211

C4H9OO.ppt
----------
E(CCSD(T)/Aug-CC-pVTZ) (Hartree): -307.69397449 
E(CCSD/Aug-CC-pVTZ) (Hartree): -307.64389199 
     T1 diagnostic:  0.021377 
E(MP2/Aug-CC-pVTZ) (Hartree): -307.58734426 
E(MP3/Aug-CC-pVTZ) (Hartree): -307.63179423 
E(PMP2/Aug-CC-pVTZ) (Hartree): -307.59050977 
E(PMP3/Aug-CC-pVTZ) (Hartree): -307.63366047 
E(PUHF/Aug-CC-pVTZ) (Hartree): -306.43502360 
E(UHF/Aug-CC-pVTZ) (Hartree): -306.42986761 
E(UM062X/Aug-CC-pVTZ) (Hartree): -308.13785552 
Electronic state : 2-A
Cartesian coordinates (Angs):
     O       2.071559     -0.969898      -0.369365
     O       1.678255     -0.158854       0.563695
     C       0.969749      0.975986       0.010746
     C      -0.371801      0.557417      -0.549780
     C      -1.310890     -0.021744       0.501400
     C      -2.649586     -0.432938      -0.096404
     H       0.866523      1.655494       0.856209
     H       1.615857      1.416363      -0.746839
     H      -0.827069      1.435739      -1.014609
     H      -0.199563     -0.169960      -1.345705
     H      -0.835028     -0.883509       0.972404
     H      -1.467697      0.717892       1.290826
     H      -2.511233     -1.190312      -0.868829
     H      -3.150467      0.420922      -0.554965
     H      -3.314661     -0.844932       0.661101
Rotational constants (GHz):    7.7211600    1.7587600    1.6398300
Vibrational harmonic frequencies (cm-1):
       68.6655                   85.0064                  164.0043            
      240.3261                  256.0950                  320.7610            
      469.0603                  571.9525                  741.6925            
      835.9105                  858.0539                  937.2168            
      977.0538                 1043.9739                 1078.5923            
     1139.3524                 1180.3964                 1242.5791            
     1276.6650                 1304.4447                 1334.6812            
     1340.1298                 1399.0464                 1409.3633            
     1415.6160                 1478.5196                 1491.1018            
     1497.2113                 1504.5328                 1512.3485            
     3051.8406                 3058.5273                 3061.8009            
     3086.6543                 3091.3125                 3109.0538            
     3127.1227                 3137.1788                 3148.7014            
Zero-point correction (Hartree): 0.129962

C4H9OO.ptm
----------
E(UM062X/Aug-CC-pVTZ) (Hartree): -308.13667864 
Electronic state : 2-A
Cartesian coordinates (Angs):
     O       2.565545      0.418933       0.201093
     O       1.863220     -0.563441      -0.273516
     C       0.512612     -0.541870       0.238557
     C      -0.280021      0.587387      -0.386180
     C      -1.683560      0.702078       0.203774
     C      -2.544633     -0.536035      -0.025104
     H       0.118757     -1.523187      -0.018473
     H       0.577195     -0.438779       1.322200
     H       0.273524      1.512332      -0.221965
     H      -0.339137      0.425113      -1.464852
     H      -1.608147      0.906190       1.274584
     H      -2.172365      1.569878      -0.240196
     H      -2.158336     -1.402803       0.511642
     H      -2.582338     -0.790505      -1.085656
     H      -3.565669     -0.371535       0.315827
Rotational constants (GHz):   10.5221800    1.5826200    1.4720400
Vibrational harmonic frequencies (cm-1):
       58.9380                  104.0631                  133.0045            
      228.6145                  290.1786                  317.6729            
      448.6610                  572.6156                  750.3374            
      804.7885                  897.3516                  954.1707            
      970.4653                 1016.5462                 1097.4471            
     1134.1413                 1183.5064                 1242.0709            
     1279.8226                 1299.7109                 1330.0963            
     1351.9190                 1378.6997                 1413.5422            
     1419.3686                 1485.6405                 1495.0177            
     1502.4177                 1508.3095                 1513.8233            
     3057.5743                 3061.1326                 3065.1330            
     3087.3573                 3098.0359                 3114.8478            
     3128.4282                 3137.4902                 3154.4759            
Zero-point correction (Hartree): 0.130055

C4H9OO.ptp
----------
E(UM062X/Aug-CC-pVTZ) (Hartree): -308.13651654 
Electronic state : 2-A
Cartesian coordinates (Angs):
     O       2.339473      0.590467      -0.560005
     O       1.952814     -0.227993       0.369878
     C       0.549346     -0.060202       0.667168
     C      -0.302376     -0.645553      -0.439803
     C      -1.793477     -0.593387      -0.114496
     C      -2.334649      0.824089       0.043384
     H       0.407268     -0.588302       1.610041
     H       0.379390      1.005531       0.808089
     H      -0.097040     -0.092915      -1.358552
     H       0.009159     -1.678607      -0.602572
     H      -2.335284     -1.099419      -0.914228
     H      -1.986995     -1.166125       0.796075
     H      -2.094793      1.428715      -0.832528
     H      -1.915773      1.323906       0.916712
     H      -3.417298      0.817752       0.160463
Rotational constants (GHz):    8.6131500    1.6349200    1.5750500
Vibrational harmonic frequencies (cm-1):
       57.6384                  105.7726                  124.7402            
      228.7614                  285.2055                  326.1112            
      433.3023                  579.3817                  754.3970            
      805.2348                  896.7094                  944.6734            
      980.3011                 1010.8467                 1097.4803            
     1134.6881                 1186.8111                 1241.5564            
     1288.5940                 1289.7053                 1335.4048            
     1351.3027                 1378.4695                 1411.3046            
     1420.7026                 1486.6176                 1494.2532            
     1502.5457                 1508.6507                 1513.9486            
     3055.1461                 3062.5287                 3066.3263            
     3091.1024                 3096.9961                 3111.1003            
     3130.2209                 3137.7702                 3154.0641            
Zero-point correction (Hartree): 0.130039

C4H9OO.ptt
----------
E(UM062X/Aug-CC-pVTZ) (Hartree): -308.13747483 
Electronic state : 2-A
Cartesian coordinates (Angs):
     O      -2.437428     -0.807816       0.316598
     O      -2.060910      0.211476      -0.392854
     C      -0.819396      0.762991       0.096962
     C       0.346704     -0.139153      -0.241519
     C       1.664400      0.438293       0.261836
     C       2.847180     -0.460848      -0.073225
     H      -0.742434      1.731774      -0.395327
     H      -0.928321      0.901262       1.172416
     H       0.168385     -1.117963       0.207437
     H       0.388150     -0.279261      -1.324035
     H       1.819142      1.428280      -0.174642
     H       1.605742      0.582470       1.343375
     H       2.937055     -0.596740      -1.151501
     H       2.722637     -1.446473       0.376238
     H       3.783024     -0.040329       0.291759
Rotational constants (GHz):   11.0523400    1.4352300    1.3552200
Vibrational harmonic frequencies (cm-1):
       84.8730                   94.5725                  136.3776            
      190.4054                  248.7347                  360.5260            
      408.3721                  569.1349                  742.8592            
      808.9412                  920.6738                  945.3595            
      977.8625                 1052.2730                 1085.0790            
     1141.7210                 1197.7491                 1246.3219            
     1281.0535                 1296.8940                 1330.3814            
     1335.4502                 1384.7594                 1414.6287            
     1417.3400                 1489.3189                 1493.7182            
     1503.0302                 1504.3737                 1515.7785            
     3048.9698                 3061.8185                 3064.8033            
     3079.5694                 3088.4340                 3110.1323            
     3130.1942                 3138.6453                 3149.0390            
Zero-point correction (Hartree): 0.129970

C4H9OO.tpm
----------
E(UM062X/Aug-CC-pVTZ) (Hartree): -308.13559081 
Electronic state : 2-A
Cartesian coordinates (Angs):
     O       2.405692     -0.587086       0.148133
     O       1.263322     -0.272779      -0.377117
     C       0.662822      0.861482       0.295275
     C      -0.700045      1.114241      -0.314044
     C      -1.809942      0.210931       0.219164
     C      -1.573355     -1.275468      -0.023401
     H       0.610852      0.614311       1.356397
     H       1.344078      1.699224       0.153208
     H      -0.956679      2.157119      -0.121489
     H      -0.612779      1.009769      -1.398548
     H      -1.926916      0.393088       1.290598
     H      -2.749980      0.510644      -0.246820
     H      -0.699739     -1.636356       0.518165
     H      -1.405057     -1.475072      -1.082268
     H      -2.432769     -1.860916       0.300658
Rotational constants (GHz):    6.2596200    2.1645200    1.7483200
Vibrational harmonic frequencies (cm-1):
       65.2752                   87.8393                  138.1386            
      262.7491                  292.3577                  326.1293            
      416.2183                  541.4714                  775.1744            
      816.5700                  859.2729                  956.4938            
      981.0522                 1015.9749                 1112.2144            
     1128.8120                 1166.0633                 1246.6662            
     1284.3940                 1297.3905                 1312.9740            
     1376.6768                 1388.6167                 1412.3654            
     1425.5334                 1474.5301                 1489.8551            
     1503.0743                 1504.8687                 1510.8803            
     3053.2215                 3062.3122                 3065.9958            
     3078.8653                 3093.2861                 3108.3942            
     3134.3194                 3135.7092                 3141.4362            
Zero-point correction (Hartree): 0.129954

C4H9OO.tpp
----------
E(UM062X/Aug-CC-pVTZ) (Hartree): -308.13661047 
Electronic state : 2-A
Cartesian coordinates (Angs):
     O       2.428168     -0.689757      -0.041620
     O       1.369483     -0.073273      -0.466634
     C       0.648837      0.558804       0.616396
     C      -0.620411      1.147348       0.043539
     C      -1.540968      0.119293      -0.614004
     C      -1.974165     -0.998946       0.327105
     H       0.461476     -0.207987       1.366545
     H       1.304970      1.319096       1.038080
     H      -1.144320      1.641113       0.865717
     H      -0.355523      1.924043      -0.675665
     H      -2.421586      0.642839      -0.988302
     H      -1.040233     -0.307182      -1.484058
     H      -2.410058     -0.594537       1.242658
     H      -1.135245     -1.635939       0.607492
     H      -2.720448     -1.636204      -0.144655
Rotational constants (GHz):    6.5717800    1.9695200    1.7600600
Vibrational harmonic frequencies (cm-1):
       43.6268                   79.7241                  155.7532            
      235.3167                  290.8175                  353.9078            
      436.5068                  551.9773                  737.7298            
      831.1779                  857.2233                  965.2001            
      982.5130                 1011.7049                 1101.8044            
     1133.5043                 1165.1944                 1238.3441            
     1274.9872                 1298.7084                 1323.5997            
     1369.6530                 1389.9455                 1408.7694            
     1422.2186                 1476.6593                 1495.5876            
     1500.6237                 1506.3072                 1521.7243            
     3058.3355                 3061.8483                 3072.2745            
     3090.4988                 3100.8808                 3109.1585            
     3129.0299                 3137.1939                 3145.0372            
Zero-point correction (Hartree): 0.130004

C4H9OO.tpt
----------
E(UM062X/Aug-CC-pVTZ) (Hartree): -308.13724149 
Electronic state : 2-A
Cartesian coordinates (Angs):
     O       2.744598     -0.516302       0.056749
     O       1.517383     -0.389891      -0.341429
     C       0.885687      0.776265       0.237123
     C      -0.556633      0.785098      -0.210671
     C      -1.368890     -0.377781       0.348273
     C      -2.816424     -0.340948      -0.122173
     H       0.986181      0.690171       1.319302
     H       1.442158      1.645192      -0.111568
     H      -0.998330      1.732747       0.106605
     H      -0.589039      0.774391      -1.302901
     H      -0.904043     -1.318234       0.048734
     H      -1.331529     -0.345457       1.440074
     H      -2.871450     -0.398787      -1.209920
     H      -3.302906      0.585785       0.185644
     H      -3.389330     -1.172061       0.286148
Rotational constants (GHz):   10.7998500    1.5008000    1.4049600
Vibrational harmonic frequencies (cm-1):
       69.0702                   82.2203                  131.6416            
      246.6220                  258.5591                  313.3786            
      393.3700                  577.4251                  735.5611            
      834.5164                  854.7116                  965.1640            
      973.9797                 1051.4806                 1088.7124            
     1149.0022                 1172.0010                 1247.3559            
     1281.2328                 1298.3101                 1329.5251            
     1339.8092                 1396.9504                 1414.7988            
     1416.6648                 1478.0754                 1497.0738            
     1502.6764                 1505.3008                 1512.5041            
     3053.4170                 3058.5624                 3063.2437            
     3080.8536                 3090.0024                 3107.2654            
     3127.8756                 3137.7514                 3139.2557            
Zero-point correction (Hartree): 0.129801

C4H9OO.ttp
----------
E(UM062X/Aug-CC-pVTZ) (Hartree): -308.13603978 
Electronic state : 2-A
Cartesian coordinates (Angs):
     O      -2.792117     -0.505574       0.083145
     O      -1.841158      0.322642      -0.218831
     C      -0.552161     -0.165732       0.214826
     C       0.488379      0.839412      -0.222607
     C       1.878627      0.497882       0.309992
     C       2.405864     -0.846155      -0.181641
     H      -0.592420     -0.270344       1.300156
     H      -0.415483     -1.147082      -0.236334
     H       0.507361      0.881405      -1.313742
     H       0.186366      1.825756       0.132622
     H       2.565411      1.288953       0.007715
     H       1.858648      0.508507       1.402427
     H       2.375692     -0.898592      -1.271198
     H       1.819175     -1.678019       0.208161
     H       3.437197     -0.999572       0.132260
Rotational constants (GHz):   10.3208700    1.4935200    1.3814200
Vibrational harmonic frequencies (cm-1):
       73.4377                   87.4963                  122.3386            
      187.6645                  278.7013                  316.7624            
      459.8331                  515.2918                  755.1411            
      803.3515                  897.5035                  958.4395            
     1002.7773                 1022.0469                 1100.3993            
     1153.8367                 1171.1538                 1238.6542            
     1289.6472                 1300.1319                 1314.9550            
     1348.8430                 1380.0314                 1416.7715            
     1424.6844                 1492.9395                 1496.7006            
     1509.0559                 1510.6229                 1513.7750            
     3058.2692                 3061.8719                 3065.2040            
     3080.1713                 3099.3636                 3107.6887            
     3129.2949                 3137.3311                 3144.4729            
Zero-point correction (Hartree): 0.129916

C4H9OO.ttt
----------
E(UM062X/Aug-CC-pVTZ) (Hartree): -308.13687274 
Point group : CS
Electronic state : 2-A"
Cartesian coordinates (Angs):
     O      -1.727504     -2.494327       0.000000
     O      -1.536015     -1.211963       0.000000
     C      -0.128958     -0.884765       0.000000
     C      -0.000000      0.619392       0.000000
     C       1.461849      1.053091       0.000000
     C       1.608927      2.568825       0.000000
     H       0.309528     -1.339092       0.888686
     H       0.309528     -1.339092      -0.888686
     H      -0.508005      1.023687      -0.878096
     H      -0.508005      1.023687       0.878096
     H       1.963760      0.633569       0.875136
     H       1.963760      0.633569      -0.875136
     H       1.135253      3.003877       0.880612
     H       1.135253      3.003877      -0.880612
     H       2.656177      2.866974       0.000000
Rotational constants (GHz):   18.3643300    1.2439100    1.1995800
Vibrational harmonic frequencies (cm-1):
       58.5685 (  A")           108.0602 (  A")           127.6418 (  A")     
      144.3769 (  A')           250.6602 (  A")           344.1483 (  A')     
      379.5320 (  A')           548.7075 (  A')           741.9474 (  A")     
      805.7788 (  A")           916.8394 (  A')           947.8143 (  A")     
     1014.4978 (  A')          1059.5708 (  A')          1090.3862 (  A')     
     1160.8244 (  A')          1175.2684 (  A")          1246.1174 (  A")     
     1291.0346 (  A')          1298.8975 (  A')          1312.7826 (  A")     
     1330.6913 (  A")          1385.3848 (  A')          1417.0954 (  A')     
     1422.5373 (  A')          1494.5830 (  A')          1499.4730 (  A')     
     1504.5856 (  A")          1507.3710 (  A')          1518.3936 (  A')     
     3049.9250 (  A')          3060.8226 (  A')          3063.6998 (  A')     
     3079.0358 (  A")          3080.3619 (  A')          3103.7429 (  A")     
     3128.7590 (  A")          3137.6657 (  A")          3139.9273 (  A')     
Zero-point correction (Hartree): 0.129736

******************************************************
1-butylperoxy B3LYP/6-31G(d,p) (5 d-orbitals) geometry
******************************************************

C4H9OO.pmm
------------------
E(UB+HF-LYP/6-31G(d,p)) (Hartree): -308.16835399 
Electronic state : 2-A
Cartesian coordinates (Angs):
     O      -1.457129     -1.291142      -0.140332
     O      -1.738949      0.001837      -0.202708
     C      -0.819853      0.789656       0.611046
     C       0.412169      1.205417      -0.189146
     C       1.318256      0.058579      -0.665168
     C       1.963786     -0.754558       0.461904
     H      -1.408526      1.663580       0.906739
     H      -0.579459      0.191288       1.492256
     H       0.077062      1.792825      -1.052692
     H       0.986142      1.891996       0.449002
     H       0.742500     -0.610560      -1.314256
     H       2.103223      0.496497      -1.294269
     H       1.215075     -1.313825       1.030484
     H       2.512594     -0.109669       1.158832
     H       2.673865     -1.482264       0.056404
Rotational constants (GHz):    5.2449900    2.4481500    1.9829800
Vibrational harmonic frequencies (cm-1):
       65.7990                   92.6933                  152.8444            
      228.7674                  263.6953                  379.8120            
      450.8651                  533.7292                  743.8626            
      804.9263                  839.6842                  913.5708            
      979.5671                  993.6180                 1080.6700            
     1125.6658                 1147.9479                 1181.2420            
     1263.2267                 1281.9719                 1329.6372            
     1369.3976                 1397.2184                 1401.2995            
     1427.7843                 1479.8299                 1487.0352            
     1501.8867                 1512.6885                 1525.6376            
     3030.3208                 3041.6155                 3045.3149            
     3074.3578                 3078.7549                 3088.4378            
     3111.2381                 3124.5922                 3144.3691            
Zero-point correction (Hartree): 0.129162

C4H9OO.pmt
------------------
E(UB+HF-LYP/6-31G(d,p)) (Hartree): -308.16907121 
Electronic state : 2-A
Cartesian coordinates (Angs):
     O      -1.857210     -1.188305       0.115920
     O      -1.807673     -0.004206      -0.475402
     C      -1.022655      0.951631       0.298594
     C       0.447636      0.915647      -0.105501
     C       1.186031     -0.373934       0.274582
     C       2.657139     -0.352798      -0.153117
     H      -1.476987      1.919374       0.064642
     H      -1.175181      0.710732       1.353823
     H       0.517062      1.085488      -1.187825
     H       0.934088      1.777199       0.373078
     H       1.117091     -0.522904       1.360013
     H       0.678487     -1.231156      -0.180682
     H       3.197726      0.478384       0.314470
     H       2.753397     -0.240037      -1.239025
     H       3.164467     -1.280275       0.130011
Rotational constants (GHz):    7.0252200    1.8662400    1.5971500
Vibrational harmonic frequencies (cm-1):
       83.5374                   94.3013                  119.1153            
      243.3226                  250.0238                  329.0613            
      461.7823                  531.7313                  745.4044            
      813.8257                  850.6561                  916.0654            
      983.0484                 1014.8628                 1062.3478            
     1127.1746                 1160.7788                 1192.8249            
     1265.8244                 1287.4679                 1335.9377            
     1346.1396                 1387.6413                 1415.4941            
     1429.1148                 1483.9793                 1487.7210            
     1504.7291                 1514.3180                 1522.1657            
     3028.5084                 3039.5218                 3043.4072            
     3066.2197                 3075.1540                 3088.7329            
     3111.4855                 3117.9187                 3139.4730            
Zero-point correction (Hartree): 0.129106

C4H9OO.ppm
------------------
E(UB+HF-LYP/6-31G(d,p)) (Hartree): -308.16806483 
Electronic state : 2-A
Cartesian coordinates (Angs):
     O      -1.938421     -0.747257       0.585720
     O      -1.331914     -0.414245      -0.541724
     C      -0.775723      0.936139      -0.457460
     C       0.408169      1.026165       0.498831
     C       1.711749      0.370192       0.015747
     C       1.670090     -1.158699      -0.097430
     H      -0.495467      1.162548      -1.491331
     H      -1.593662      1.591360      -0.145545
     H       0.587613      2.094835       0.675006
     H       0.091312      0.601940       1.459184
     H       1.992744      0.804727      -0.953782
     H       2.509130      0.655220       0.713523
     H       0.945592     -1.493206      -0.844896
     H       1.387452     -1.616218       0.857132
     H       2.652256     -1.551973      -0.379383
Rotational constants (GHz):    5.4337200    2.3720800    1.9536700
Vibrational harmonic frequencies (cm-1):
       66.2059                   88.4920                  161.0223            
      247.6245                  306.2732                  325.3073            
      453.7618                  538.3215                  777.4333            
      800.0883                  836.5725                  916.0823            
      960.0994                  996.1885                 1090.6885            
     1106.8885                 1160.1677                 1191.9076            
     1260.9869                 1287.6357                 1320.7037            
     1380.8678                 1392.3611                 1396.7360            
     1436.4776                 1484.3209                 1487.7208            
     1503.1014                 1516.0055                 1521.9870            
     3025.8189                 3040.8667                 3048.8589            
     3064.5024                 3069.1771                 3090.2077            
     3114.7858                 3131.3674                 3133.0150            
Zero-point correction (Hartree): 0.129242

C4H9OO.ppp
------------------
E(UB+HF-LYP/6-31G(d,p)) (Hartree): -308.16863841 
Electronic state : 2-A
Cartesian coordinates (Angs):
     O       2.326315      0.329656      -0.516647
     O       1.443613     -0.645512      -0.369006
     C       0.635439     -0.440764       0.832168
     C      -0.315202      0.738913       0.669715
     C      -1.347704      0.588321      -0.459460
     C      -2.378062     -0.524629      -0.234438
     H       0.115480     -1.394881       0.954685
     H       1.328384     -0.291182       1.664539
     H      -0.826653      0.884304       1.630884
     H       0.298698      1.630082       0.499322
     H      -1.871875      1.545230      -0.569265
     H      -0.819895      0.419615      -1.405505
     H      -2.923347     -0.377390       0.705185
     H      -1.913573     -1.515880      -0.197708
     H      -3.113463     -0.544095      -1.044821
Rotational constants (GHz):    7.2864300    1.8230600    1.8102700
Vibrational harmonic frequencies (cm-1):
       50.1627                   87.3506                  162.9921            
      228.1031                  260.8601                  378.8501            
      451.1775                  559.4697                  737.5335            
      810.3851                  836.1283                  920.5828            
      964.7638                 1004.9849                 1074.0614            
     1131.4200                 1149.2827                 1176.4646            
     1265.4146                 1275.0561                 1329.8951            
     1371.2880                 1396.8928                 1401.9539            
     1431.0783                 1485.1730                 1493.4667            
     1504.2780                 1516.8800                 1522.3012            
     3039.5599                 3042.2219                 3048.6326            
     3078.9704                 3082.5839                 3096.3131            
     3111.8392                 3117.1223                 3140.2862            
Zero-point correction (Hartree): 0.129254

C4H9OO.ppt
------------------
E(UB+HF-LYP/6-31G(d,p)) (Hartree): -308.16976898 
Electronic state : 2-A
Cartesian coordinates (Angs):
     O       2.127013     -0.972372      -0.362440
     O       1.699238     -0.148242       0.580632
     C       0.970946      0.977609      -0.002553
     C      -0.376958      0.542180      -0.560156
     C      -1.344594      0.000979       0.500068
     C      -2.683029     -0.447385      -0.094108
     H       0.869746      1.676732       0.833672
     H       1.614557      1.411155      -0.772647
     H      -0.821308      1.408034      -1.069354
     H      -0.192083     -0.215688      -1.330813
     H      -0.870908     -0.839195       1.021165
     H      -1.519310      0.775081       1.259887
     H      -2.541803     -1.247224      -0.829509
     H      -3.191969      0.381114      -0.600109
     H      -3.355128     -0.825398       0.682663
Rotational constants (GHz):    7.6581400    1.7027100    1.5928300
Vibrational harmonic frequencies (cm-1):
       70.0638                   85.5390                  146.7859            
      234.7707                  250.4747                  314.3466            
      459.1124                  555.9410                  743.8892            
      820.4788                  840.1202                  913.6425            
      975.3905                 1021.0663                 1061.1333            
     1131.4066                 1157.6367                 1192.0991            
     1269.8383                 1282.3400                 1337.5823            
     1343.5809                 1390.4798                 1413.3277            
     1428.9247                 1487.7968                 1491.8395            
     1506.8285                 1512.8758                 1522.7109            
     3031.2217                 3038.5832                 3042.1465            
     3070.2472                 3074.7393                 3092.0777            
     3111.2816                 3117.6101                 3134.8516            
Zero-point correction (Hartree): 0.129115

C4H9OO.ptm
------------------
E(UB+HF-LYP/6-31G(d,p)) (Hartree): -308.16841161 
Electronic state : 2-A
Cartesian coordinates (Angs):
     O       2.603484      0.445483       0.161438
     O       1.890000     -0.583227      -0.267797
     C       0.537209     -0.544807       0.278484
     C      -0.281722      0.563149      -0.372343
     C      -1.698745      0.692899       0.210067
     C      -2.608774     -0.514457      -0.050449
     H       0.146889     -1.543653       0.066131
     H       0.626258     -0.405109       1.360191
     H       0.266789      1.500278      -0.228907
     H      -0.334629      0.380644      -1.453076
     H      -1.631879      0.878199       1.290548
     H      -2.161060      1.588793      -0.220914
     H      -2.240269     -1.422997       0.438109
     H      -2.688410     -0.724257      -1.123242
     H      -3.619374     -0.330659       0.327475
Rotational constants (GHz):   10.5370200    1.5297700    1.4266900
Vibrational harmonic frequencies (cm-1):
       63.0595                  100.4281                  132.3777            
      214.5396                  289.4182                  307.2035            
      441.6056                  556.8512                  753.6951            
      804.9800                  885.3329                  912.7882            
      963.6898                  998.2971                 1080.3288            
     1128.8045                 1163.7271                 1190.0377            
     1263.6184                 1293.8599                 1323.3075            
     1347.8093                 1385.9789                 1408.4440            
     1432.0259                 1491.3091                 1503.1249            
     1509.0710                 1518.1945                 1522.0623            
     3035.2395                 3042.8991                 3047.3134            
     3073.3664                 3074.7042                 3098.4248            
     3112.2998                 3117.5955                 3140.0924            
Zero-point correction (Hartree): 0.129236

C4H9OO.ptp
------------------
E(UB+HF-LYP/6-31G(d,p)) (Hartree): -308.16822341 
Electronic state : 2-A
Cartesian coordinates (Angs):
     O       2.345752      0.700615      -0.496240
     O       1.989021     -0.280819       0.317259
     C       0.578133     -0.175170       0.673211
     C      -0.306884     -0.596835      -0.493378
     C      -1.808212     -0.573876      -0.160333
     C      -2.379578      0.822841       0.114561
     H       0.473206     -0.845995       1.532056
     H       0.402708      0.856637       0.986568
     H      -0.094903      0.069985      -1.337321
     H      -0.012473     -1.607528      -0.800112
     H      -2.347628     -1.020631      -1.003958
     H      -2.002514     -1.228712       0.700064
     H      -2.193556      1.497387      -0.728696
     H      -1.941912      1.281819       1.007454
     H      -3.461866      0.776905       0.271423
Rotational constants (GHz):    8.3879800    1.5982900    1.5310600
Vibrational harmonic frequencies (cm-1):
       61.4610                   98.5323                  127.4513            
      211.4826                  286.4780                  320.0173            
      420.6933                  564.6670                  757.9269            
      802.0752                  883.0033                  908.0892            
      972.5113                  991.1395                 1079.3180            
     1129.5129                 1162.9114                 1194.0513            
     1264.1889                 1291.2238                 1326.2331            
     1346.4590                 1384.3263                 1407.2076            
     1433.6776                 1490.9196                 1503.3681            
     1509.2517                 1519.0264                 1521.4008            
     3032.3548                 3044.8008                 3048.9015            
     3071.9989                 3073.6730                 3094.6756            
     3114.2953                 3117.6094                 3140.8219            
Zero-point correction (Hartree): 0.129190

C4H9OO.ptt
------------------
E(UB+HF-LYP/6-31G(d,p)) (Hartree): -308.16962037 
Electronic state : 2-A
Cartesian coordinates (Angs):
     O      -2.457910     -0.827627       0.317693
     O      -2.081793      0.220496      -0.397920
     C      -0.828258      0.771487       0.104490
     C       0.349068     -0.127348      -0.246898
     C       1.681850      0.434048       0.266448
     C       2.873199     -0.466118      -0.076720
     H      -0.761188      1.751163      -0.379040
     H      -0.939094      0.901011       1.185104
     H       0.161392     -1.116319       0.186861
     H       0.388829     -0.255091      -1.335960
     H       1.846110      1.434457      -0.156310
     H       1.625733      0.567936       1.355019
     H       2.975647     -0.591403      -1.160320
     H       2.754897     -1.462830       0.362252
     H       3.810148     -0.044301       0.300284
Rotational constants (GHz):   10.8049800    1.4083900    1.3292800
Vibrational harmonic frequencies (cm-1):
       80.5724                   95.3775                  131.8192            
      186.7968                  246.9785                  349.0297            
      402.5466                  551.6536                  750.4796            
      809.5911                  903.6810                  919.2911            
      963.4719                 1028.9198                 1066.1791            
     1132.5870                 1165.1045                 1208.0444            
     1266.8897                 1292.8403                 1323.2736            
     1335.8745                 1384.6409                 1414.0931            
     1429.0769                 1492.0157                 1504.0880            
     1512.7411                 1513.0099                 1525.9369            
     3026.8993                 3043.2154                 3047.7118            
     3057.9025                 3070.5201                 3094.3595            
     3113.8173                 3118.8638                 3133.8016            
Zero-point correction (Hartree): 0.129158

C4H9OO.tpm
------------------
E(UB+HF-LYP/6-31G(d,p)) (Hartree): -308.16715379 
Electronic state : 2-A
Cartesian coordinates (Angs):
     O       2.473519     -0.609293       0.146555
     O       1.246840     -0.386604      -0.293134
     C       0.734304      0.887021       0.209854
     C      -0.669542      1.112432      -0.334775
     C      -1.781484      0.256694       0.296321
     C      -1.736899     -1.234572      -0.058074
     H       0.757871      0.838133       1.303588
     H       1.432228      1.659976      -0.125724
     H      -0.897218      2.172987      -0.167476
     H      -0.650967      0.972039      -1.423350
     H      -1.746803      0.379193       1.387690
     H      -2.746537      0.670369      -0.021831
     H      -0.818516     -1.710696       0.294710
     H      -1.785267     -1.381476      -1.142841
     H      -2.585951     -1.762799       0.387919
Rotational constants (GHz):    6.2229200    2.0597600    1.6700400
Vibrational harmonic frequencies (cm-1):
       54.5317                   74.0781                  134.1408            
      234.0146                  288.3161                  324.8921            
      405.6265                  522.1460                  783.7569            
      789.9156                  837.7512                  955.2282            
      958.3060                  997.7970                 1097.7041            
     1121.2760                 1159.0936                 1202.2726            
     1239.3749                 1284.4441                 1316.1347            
     1377.7653                 1394.7723                 1408.4001            
     1435.6153                 1482.5074                 1496.7756            
     1508.2087                 1514.2431                 1522.1238            
     3029.0647                 3038.5327                 3048.9863            
     3061.7849                 3067.7323                 3081.8097            
     3113.4088                 3120.4023                 3137.5725            
Zero-point correction (Hartree): 0.128991

C4H9OO.tpp
------------------
E(UB+HF-LYP/6-31G(d,p)) (Hartree): -308.16783821 
Electronic state : 2-A
Cartesian coordinates (Angs):
     O       2.522316     -0.699477      -0.025943
     O       1.463120     -0.044440      -0.469170
     C       0.671004      0.489170       0.636514
     C      -0.589379      1.106943       0.049216
     C      -1.538891      0.109259      -0.636954
     C      -2.184654     -0.904587       0.314194
     H       0.469769     -0.339841       1.320357
     H       1.291179      1.229560       1.151421
     H      -1.112678      1.620286       0.866938
     H      -0.290894      1.884775      -0.663894
     H      -2.326756      0.681452      -1.141328
     H      -0.991790     -0.419620      -1.426072
     H      -2.750641     -0.402213       1.107435
     H      -1.441831     -1.550815       0.793612
     H      -2.878320     -1.556957      -0.225388
Rotational constants (GHz):    6.9436400    1.7916700    1.6470100
Vibrational harmonic frequencies (cm-1):
       46.9493                   66.6010                  145.1147            
      243.2167                  260.9388                  350.0076            
      428.6307                  530.5657                  745.1823            
      812.8113                  844.4942                  947.9665            
      966.0700                 1001.1789                 1081.8191            
     1134.6648                 1155.3112                 1205.4895            
     1225.4837                 1276.1135                 1328.1510            
     1370.1612                 1395.1450                 1408.6035            
     1433.7552                 1485.6010                 1503.9242            
     1506.6266                 1517.9893                 1525.6869            
     3039.2222                 3043.6569                 3048.1350            
     3072.6209                 3080.1978                 3087.5267            
     3113.4994                 3118.5073                 3131.4445            
Zero-point correction (Hartree): 0.129124

C4H9OO.tpt
------------------
E(UB+HF-LYP/6-31G(d,p)) (Hartree): -308.16897383 
Electronic state : 2-A
Cartesian coordinates (Angs):
     O       2.781631     -0.517214       0.064832
     O       1.532283     -0.396862      -0.349558
     C       0.893379      0.780109       0.234739
     C      -0.560750      0.790255      -0.208461
     C      -1.388257     -0.378485       0.344127
     C      -2.847288     -0.342524      -0.119301
     H       1.003169      0.703029       1.321167
     H       1.445346      1.656386      -0.119004
     H      -0.996517      1.744540       0.115884
     H      -0.596406      0.791934      -1.305496
     H      -0.924195     -1.322997       0.037802
     H      -1.348765     -0.358245       1.441674
     H      -2.918030     -0.396106      -1.211543
     H      -3.343702      0.581361       0.199301
     H      -3.414719     -1.183429       0.291395
Rotational constants (GHz):   10.6803800    1.4666200    1.3735200
Vibrational harmonic frequencies (cm-1):
       53.9941                   80.0026                  125.2187            
      241.5411                  254.1428                  306.3249            
      382.2146                  563.3249                  736.0402            
      823.8399                  840.7120                  946.2540            
      966.9173                 1025.8870                 1066.9454            
     1139.7416                 1163.2591                 1207.7270            
     1237.7322                 1278.7846                 1332.8393            
     1339.6260                 1391.7011                 1416.6826            
     1429.1152                 1488.0647                 1505.0033            
     1508.0188                 1513.9229                 1522.7707            
     3032.1468                 3038.4606                 3042.3821            
     3063.0046                 3071.1077                 3087.0801            
     3110.7756                 3118.3571                 3122.2106            
Zero-point correction (Hartree): 0.128885

C4H9OO.ttp
------------------
E(UB+HF-LYP/6-31G(d,p)) (Hartree): -308.16740200 
Electronic state : 2-A
Cartesian coordinates (Angs):
     O      -2.837461     -0.512009       0.077126
     O      -1.862399      0.319944      -0.247244
     C      -0.576459     -0.155514       0.253509
     C       0.487907      0.821344      -0.223567
     C       1.892179      0.493769       0.313246
     C       2.473159     -0.832392      -0.192588
     H      -0.643692     -0.194239       1.346218
     H      -0.436537     -1.169863      -0.129436
     H       0.499777      0.830338      -1.320600
     H       0.198829      1.829043       0.097373
     H       2.563486      1.311672       0.026601
     H       1.869899      0.492298       1.411262
     H       2.500250     -0.858980      -1.287870
     H       1.889202     -1.694775       0.145524
     H       3.496945     -0.972212       0.168276
Rotational constants (GHz):   10.3399200    1.4415000    1.3416700
Vibrational harmonic frequencies (cm-1):
       56.5666                   81.5078                  119.8352            
      174.6756                  265.8758                  310.0152            
      449.8600                  497.5121                  757.6076            
      802.6232                  881.1624                  956.1961            
      962.0904                 1003.5069                 1080.2010            
     1144.7154                 1164.5720                 1201.8608            
     1231.3519                 1296.2790                 1313.8027            
     1348.4037                 1385.2097                 1416.4671            
     1432.6713                 1501.6368                 1504.9465            
     1514.0287                 1519.2613                 1521.3900            
     3035.3552                 3043.9733                 3046.3991            
     3064.7713                 3075.2338                 3087.4717            
     3114.5101                 3118.6776                 3130.0819            
Zero-point correction (Hartree): 0.128972

C4H9OO.ttt
------------------
E(UB+HF-LYP/6-31G(d,p)) (Hartree): -308.16867294 
Point group : CS
Electronic state : 2-A"
Cartesian coordinates (Angs):
     O      -1.729043     -2.535099       0.000000
     O      -1.545055     -1.225653       0.000000
     C      -0.124370     -0.894732       0.000000
     C       0.000000      0.619902       0.000000
     C       1.465348      1.077855       0.000000
     C       1.608928      2.602535       0.000000
     H       0.318916     -1.352297       0.890435
     H       0.318916     -1.352297      -0.890435
     H      -0.517126      1.021582      -0.880241
     H      -0.517126      1.021582       0.880241
     H       1.977290      0.661358       0.877764
     H       1.977290      0.661358      -0.877764
     H       1.136686      3.045014       0.884084
     H       1.136686      3.045014      -0.884084
     H       2.661809      2.901351       0.000000
Rotational constants (GHz):   18.1393600    1.2195800    1.1762000
Vibrational harmonic frequencies (cm-1):
       49.4808 (  A")            97.4826 (  A")           120.2044 (  A")     
      140.0057 (  A')           243.2940 (  A")           336.5593 (  A')     
      368.5425 (  A')           533.0595 (  A')           747.1075 (  A")     
      805.4279 (  A")           901.5871 (  A')           947.7364 (  A")     
      967.9347 (  A')          1037.2944 (  A')          1069.9702 (  A')     
     1147.0938 (  A')          1167.4451 (  A")          1203.0342 (  A')     
     1240.7283 (  A")          1297.8374 (  A')          1309.5073 (  A")     
     1335.2197 (  A")          1385.6320 (  A')          1419.2263 (  A')     
     1429.1058 (  A')          1503.5455 (  A')          1505.6708 (  A')     
     1511.7793 (  A")          1514.4020 (  A')          1527.1649 (  A')     
     3028.0935 (  A')          3042.0235 (  A')          3046.2617 (  A')     
     3057.8265 (  A")          3062.5724 (  A')          3085.6960 (  A")     
     3112.4062 (  A")          3119.1034 (  A')          3121.2486 (  A")     
Zero-point correction (Hartree): 0.128804

C4H9OO.1-5Hshift.R
------------------
E(UB+HF-LYP/6-31G(d,p)) (Hartree): -308.12845233 
Electronic state : 2-A
Cartesian coordinates (Angs):
     C      -1.082389      0.010699      -0.601522
     C      -0.190489      1.204021      -0.314461
     C       1.044750      0.802640       0.528115
     O       1.723965     -0.258639      -0.127842
     O       0.885999     -1.398872      -0.037450
     C      -2.123336     -0.362926       0.427198
     H      -1.412852     -0.074871      -1.638886
     H      -0.740049      1.983956       0.234088
     H       0.167057      1.645633      -1.249493
     H       0.756266      0.490442       1.539372
     H       1.769099      1.621123       0.589212
     H      -0.105850     -0.967543      -0.484042
     H      -2.913777      0.400532       0.481639
     H      -1.685563     -0.450298       1.427571
     H      -2.605257     -1.315486       0.186900
Rotational constants (GHz):    5.4748400    2.7009900    2.1280800
Vibrational harmonic frequencies (cm-1):
    i1641.8707                  117.6419                  165.3026            
      189.8777                  336.1420                  397.1260            
      469.2832                  515.2174                  637.5079            
      770.3556                  830.9774                  865.6496            
      930.9342                  952.0979                 1008.7337            
     1030.9164                 1072.7049                 1121.4075            
     1160.6907                 1177.2049                 1246.6585            
     1271.7368                 1348.0519                 1357.9225            
     1388.8364                 1420.9561                 1478.6776            
     1485.7664                 1498.6302                 1503.5419            
     1588.2513                 3010.2333                 3015.1062            
     3046.1585                 3083.5994                 3096.9078            
     3115.1316                 3118.0177                 3130.7829            
Zero-point correction (Hartree): 0.122918

C4H9OO.1-5Hshift.S
------------------
E(UB+HF-LYP/6-31G(d,p)) (Hartree): -308.12869368 
Electronic state : 2-A
Cartesian coordinates (Angs):
     C      -1.065290      0.022026       0.471491
     C      -0.208302      1.169839      -0.024938
     C       1.297685      0.861510       0.125163
     O       1.579099     -0.368509      -0.530507
     O       0.970168     -1.391353       0.241524
     H      -1.169273     -0.016006       1.560099
     C      -2.321888     -0.317922      -0.291533
     H      -0.429238      2.096360       0.526163
     H      -0.415128      1.360249      -1.084091
     H       1.589614      0.794852       1.180644
     H       1.913470      1.611805      -0.381164
     H      -0.125024     -0.985782       0.307379
     H      -2.114330     -0.462869      -1.357280
     H      -3.061739      0.493893      -0.213377
     H      -2.795715     -1.226326       0.092397
Rotational constants (GHz):    5.7102200    2.5220300    1.9787400
Vibrational harmonic frequencies (cm-1):
    i1644.1213                   99.0759                  185.8505            
      203.4775                  364.3491                  379.8786            
      442.5095                  489.8981                  587.5353            
      804.9861                  847.4868                  874.2678            
      934.1184                  962.8283                  996.9883            
     1041.4120                 1104.4548                 1126.6908            
     1168.3754                 1171.9818                 1229.6635            
     1272.1455                 1325.6563                 1383.4647            
     1390.0740                 1422.4115                 1478.1732            
     1486.3341                 1497.0546                 1499.6244            
     1587.7561                 3003.7171                 3012.9658            
     3044.4514                 3081.0269                 3082.3319            
     3100.6336                 3115.9909                 3126.0824            
Zero-point correction (Hartree): 0.122852

C4H9OO.1-6Hshift.a
------------------
E(UB+HF-LYP/6-31G(d,p)) (Hartree): -308.12594527 
Electronic state : 2-A
Cartesian coordinates (Angs):
     O       0.997600     -1.323656      -0.351809
     H      -0.079734     -1.406991      -0.012588
     C      -1.412048     -1.053398       0.283662
     O       1.492079     -0.229280       0.403105
     C      -1.508903      0.327262      -0.319357
     C       1.005514      0.982897      -0.183456
     C      -0.440521      1.311375       0.200580
     H      -1.393806     -1.107844       1.374027
     H      -2.004589     -1.838942      -0.186222
     H      -1.442166      0.254413      -1.412694
     H      -2.506010      0.744399      -0.105674
     H       1.679763      1.752916       0.209214
     H       1.131580      0.925716      -1.271857
     H      -0.662364      2.313975      -0.187596
     H      -0.504357      1.377029       1.294441
Rotational constants (GHz):    4.6522800    3.3326800    2.1945400
Vibrational harmonic frequencies (cm-1):
    i1564.1362                  149.5010                  193.4012            
      313.9148                  352.6452                  424.2550            
      506.6211                  545.4655                  619.1406            
      783.1235                  804.5678                  868.8106            
      918.4346                  952.8578                  975.8200            
     1013.7381                 1047.6423                 1093.5624            
     1156.9473                 1204.8361                 1260.8767            
     1267.8688                 1315.5659                 1372.8655            
     1396.2259                 1406.3797                 1461.3873            
     1476.3219                 1484.1409                 1489.6599            
     1496.3901                 2994.7383                 3035.0545            
     3041.6491                 3056.6582                 3079.5594            
     3099.0789                 3100.3719                 3190.6158            
Zero-point correction (Hartree): 0.122909

C4H9OO.1-6Hshift.b
------------------
E(UB+HF-LYP/6-31G(d,p)) (Hartree): -308.12377617 
Electronic state : 2-A
Cartesian coordinates (Angs):
     O       0.849283     -1.369365       0.394911
     H      -0.277809     -1.359207       0.230515
     C      -1.589852     -0.879186       0.040189
     O       1.282850     -0.424868      -0.568930
     C      -1.344501      0.550293      -0.389649
     C       1.176873      0.884388       0.000865
     C      -0.249702      1.239013       0.456743
     H      -1.999051     -1.008138       1.044530
     H      -2.022624     -1.556971      -0.696068
     H      -1.073486      0.583695      -1.450676
     H      -2.284092      1.115633      -0.291558
     H       1.895771      0.996429       0.822437
     H       1.491596      1.527147      -0.829834
     H      -0.359237      2.328423       0.406490
     H      -0.385039      0.959814       1.507427
Rotational constants (GHz):    4.6307500    3.4118400    2.3192400
Vibrational harmonic frequencies (cm-1):
    i1598.1322                  126.2105                  245.9230            
      268.6532                  355.5002                  415.8048            
      459.0411                  587.8876                  616.0225            
      783.0970                  837.0947                  854.5858            
      929.1119                  974.9826                  985.0100            
     1015.7883                 1065.8074                 1085.1649            
     1147.3257                 1179.3966                 1249.5721            
     1271.4167                 1295.5652                 1356.8890            
     1392.3039                 1400.3242                 1465.1823            
     1485.1283                 1493.7194                 1506.4581            
     1514.2179                 3003.5237                 3036.7550            
     3055.9826                 3080.2342                 3085.6946            
     3097.9100                 3104.3307                 3188.9319            
Zero-point correction (Hartree): 0.123059

*******************************************
1-butylperoxy B3LYP/6-311G(2d,d,p) geometry
*******************************************

C4H9OO.ppt
------------------
E(CBS-QB3) excl. ZPE (Hartree): -307.76921500 
E(CBS-QB3) inc. ZPE scaled by 0.99 (Hartree): -307.64213800 
E(CCSD(T)/6-31+(d')) (Hartree): -307.29090765 
E(CCSD/6-31+(d')) (Hartree): -307.26178511 
E(MP2/6-31+(d')) (Hartree): -307.19335013 
E(MP2/CBSB3) (Hartree): -307.53535641 
E(MP2/CBSB4) (Hartree): -307.26367435 
E(MP3/6-31+(d')) (Hartree): -307.23843182 
E(MP3/CBSB4) (Hartree): -307.31462292 
E(PMP2/6-31+(d')) (Hartree): -307.19608598 
E(PMP2/CBSB3) (Hartree): -307.53847174 
E(PMP2/CBSB4) (Hartree): -307.26641294 
E(PMP3/6-31+(d')) (Hartree): -307.24015566 
E(PMP3/CBSB4) (Hartree): -307.31634891 
E(PUHF/6-31+(d')) (Hartree): -306.31740141 
E(PUHF/CBSB3) (Hartree): -306.42100042 
E(PUHF/CBSB4) (Hartree): -306.32895072 
E(UB+HF-LYP/CBSB7) (Hartree): -308.25153296 
E(UHF/6-31+(d')) (Hartree): -306.31304409 
E(UHF/CBSB3) (Hartree): -306.41597763 
E(UHF/CBSB4) (Hartree): -306.32458985 
Electronic state : 2-A
Cartesian coordinates (Angs):
     O       2.132256     -0.972489      -0.358863
     O       1.700787     -0.148684       0.575337
     C       0.967231      0.979305      -0.002357
     C      -0.379269      0.544285      -0.558610
     C      -1.347194      0.004149       0.500342
     C      -2.681416     -0.452520      -0.094983
     H       0.869238      1.671510       0.836837
     H       1.609556      1.412648      -0.770757
     H      -0.822733      1.409642      -1.066003
     H      -0.196631     -0.211435      -1.329497
     H      -0.873455     -0.830845       1.025733
     H      -1.527431      0.780051       1.254323
     H      -2.534265     -1.253873      -0.825204
     H      -3.192511      0.370450      -0.604475
     H      -3.352227     -0.830069       0.680898
Rotational constants (GHz):    7.6633000    1.7018700    1.5906000
Vibrational harmonic frequencies (cm-1):
       71.3698                   84.1944                  147.2996            
      232.5361                  248.1480                  314.1516            
      457.5504                  556.4225                  742.6631            
      814.6256                  835.2455                  908.0626            
      973.5282                 1014.9749                 1055.4289            
     1127.4456                 1147.4598                 1184.3079            
     1266.3476                 1280.7841                 1334.3944            
     1342.7197                 1385.3857                 1404.7335            
     1416.6256                 1477.9332                 1480.6861            
     1495.8437                 1501.1431                 1511.0109            
     3013.2871                 3020.0214                 3023.0332            
     3049.5367                 3058.8749                 3069.5562            
     3086.3308                 3091.2528                 3118.8151            
Zero-point correction (Hartree): 0.128360

C4H9OO.1-5Hshift.R
------------------
E(CBS-QB3) excl. ZPE (Hartree): -307.72967600 
E(CBS-QB3) inc. ZPE scaled by 0.99 (Hartree): -307.60865900 
E(CCSD(T)/6-31+(d')) (Hartree): -307.23738849 
E(CCSD/6-31+(d')) (Hartree): -307.20507549 
E(MP2/6-31+(d')) (Hartree): -307.14386508 
E(MP2/CBSB3) (Hartree): -307.49687518 
E(MP2/CBSB4) (Hartree): -307.22205638 
E(MP3/6-31+(d')) (Hartree): -307.18345660 
E(MP3/CBSB4) (Hartree): -307.26688940 
E(PMP2/6-31+(d')) (Hartree): -307.15083138 
E(PMP2/CBSB3) (Hartree): -307.50373428 
E(PMP2/CBSB4) (Hartree): -307.22863816 
E(PMP3/6-31+(d')) (Hartree): -307.18751373 
E(PMP3/CBSB4) (Hartree): -307.27067589 
E(PUHF/6-31+(d')) (Hartree): -306.24560891 
E(PUHF/CBSB3) (Hartree): -306.35440987 
E(PUHF/CBSB4) (Hartree): -306.26260857 
E(UB+HF-LYP/CBSB7) (Hartree): -308.21025324 
E(UHF/6-31+(d')) (Hartree): -306.23571382 
E(UHF/CBSB3) (Hartree): -306.34462108 
E(UHF/CBSB4) (Hartree): -306.25319109 
Cartesian coordinates (Angs):
     C      -1.079831      0.001518      -0.595879
     C      -0.193383      1.198800      -0.317205
     C       1.045515      0.808823       0.523720
     O       1.724671     -0.256434      -0.126211
     O       0.896067     -1.397138      -0.032256
     C      -2.132441     -0.358854       0.423606
     H      -1.395631     -0.102019      -1.633848
     H      -0.744664      1.976419       0.229524
     H       0.159686      1.637010      -1.253358
     H       0.764028      0.501534       1.536132
     H       1.768124      1.626298       0.573371
     H      -0.113608     -0.969551      -0.464102
     H      -2.935425      0.391204       0.438542
     H      -1.714996     -0.409105       1.433345
     H      -2.592571     -1.324937       0.202679
Rotational constants (GHz):    5.5010200    2.6917800    2.1220300
Vibrational harmonic frequencies (cm-1):
    i1696.7936                  117.6149                  169.1102            
      190.4832                  336.8844                  398.3831            
      470.0865                  515.2385                  637.4377            
      772.3770                  826.1997                  860.4994            
      924.1977                  948.3757                 1005.2291            
     1020.0518                 1067.5217                 1115.8060            
     1155.4813                 1170.7030                 1239.0588            
     1268.7850                 1341.5157                 1351.9320            
     1380.3224                 1409.4479                 1468.2891            
     1476.9975                 1486.9010                 1491.1747            
     1581.5441                 2989.9064                 2996.0816            
     3032.0556                 3059.3545                 3076.6035            
     3091.4557                 3102.8739                 3110.8312            
Zero-point correction (Hartree): 0.122239

C4H9OO.1-5Hshift.S
------------------
E(CBS-QB3) excl. ZPE (Hartree): -307.72952300 
E(CBS-QB3) inc. ZPE scaled by 0.99 (Hartree): -307.60857600 
E(CCSD(T)/6-31+(d')) (Hartree): -307.23741408 
E(CCSD/6-31+(d')) (Hartree): -307.20516261 
E(MP2/6-31+(d')) (Hartree): -307.14399812 
E(MP2/CBSB3) (Hartree): -307.49681091 
E(MP2/CBSB4) (Hartree): -307.22222060 
E(MP3/6-31+(d')) (Hartree): -307.18361129 
E(MP3/CBSB4) (Hartree): -307.26709720 
E(PMP2/6-31+(d')) (Hartree): -307.15095247 
E(PMP2/CBSB3) (Hartree): -307.50365136 
E(PMP2/CBSB4) (Hartree): -307.22878281 
E(PMP3/6-31+(d')) (Hartree): -307.18766038 
E(PMP3/CBSB4) (Hartree): -307.27087110 
E(PUHF/6-31+(d')) (Hartree): -306.24609567 
E(PUHF/CBSB3) (Hartree): -306.35487292 
E(PUHF/CBSB4) (Hartree): -306.26309523 
E(UB+HF-LYP/CBSB7) (Hartree): -308.21046669 
E(UHF/6-31+(d')) (Hartree): -306.23621578 
E(UHF/CBSB3) (Hartree): -306.34510886 
E(UHF/CBSB4) (Hartree): -306.25370378 
Cartesian coordinates (Angs):
     C      -1.065868      0.035518       0.478739
     C      -0.203853      1.175645      -0.022544
     C       1.300603      0.859066       0.116144
     O       1.566408     -0.379615      -0.530155
     O       0.958915     -1.392169       0.248155
     H      -1.185784      0.012571       1.564001
     C      -2.307231     -0.321754      -0.298336
     H      -0.412929      2.101223       0.531249
     H      -0.415749      1.367973      -1.078442
     H       1.602967      0.796768       1.166781
     H       1.916183      1.596271      -0.404197
     H      -0.136431     -0.970234       0.341940
     H      -2.079849     -0.489770      -1.354973
     H      -3.047790      0.489857      -0.250909
     H      -2.785107     -1.221231       0.096535
Rotational constants (GHz):    5.6806900    2.5440300    1.9914000
Vibrational harmonic frequencies (cm-1):
    i1694.9013                   96.6436                  186.4983            
      202.5036                  365.4734                  381.0163            
      445.5459                  496.2719                  592.4245            
      800.6747                  841.9527                  871.4366            
      926.0738                  957.7739                  996.1991            
     1027.1351                 1095.0697                 1121.3489            
     1163.2965                 1165.5608                 1224.3330            
     1269.5549                 1322.2396                 1374.6705            
     1382.1459                 1410.9291                 1467.0960            
     1476.6251                 1485.4156                 1488.3113            
     1580.8615                 2983.0657                 2995.4823            
     3029.6040                 3057.2574                 3061.0495            
     3080.5664                 3100.8967                 3102.8365            
Zero-point correction (Hartree): 0.122169

C4H9OO.1-6Hshift.a
------------------
E(CBS-QB3) excl. ZPE (Hartree): -307.72588300 
E(CBS-QB3) inc. ZPE scaled by 0.99 (Hartree): -307.60488000 
E(CCSD(T)/6-31+(d')) (Hartree): -307.23484909 
E(CCSD/6-31+(d')) (Hartree): -307.20343549 
E(MP2/6-31+(d')) (Hartree): -307.14253296 
E(MP2/CBSB3) (Hartree): -307.49529996 
E(MP2/CBSB4) (Hartree): -307.22104701 
E(MP3/6-31+(d')) (Hartree): -307.18283476 
E(MP3/CBSB4) (Hartree): -307.26663590 
E(PMP2/6-31+(d')) (Hartree): -307.14873543 
E(PMP2/CBSB3) (Hartree): -307.50134554 
E(PMP2/CBSB4) (Hartree): -307.22683686 
E(PMP3/6-31+(d')) (Hartree): -307.18643695 
E(PMP3/CBSB4) (Hartree): -307.26996259 
E(PUHF/6-31+(d')) (Hartree): -306.24629065 
E(PUHF/CBSB3) (Hartree): -306.35470046 
E(PUHF/CBSB4) (Hartree): -306.26361633 
E(UB+HF-LYP/CBSB7) (Hartree): -308.20787864 
E(UHF/6-31+(d')) (Hartree): -306.23739120 
E(UHF/CBSB3) (Hartree): -306.34597949 
E(UHF/CBSB4) (Hartree): -306.25524523 
Cartesian coordinates (Angs):
     O      -1.004077     -1.323030       0.342422
     H       0.087223     -1.407634       0.017732
     C       1.406236     -1.059759      -0.275712
     O      -1.494514     -0.223388      -0.397338
     C       1.512926      0.325173       0.313079
     C      -0.999973      0.988232       0.187759
     C       0.443863      1.309544      -0.203148
     H       1.391062     -1.124574      -1.363782
     H       1.991297     -1.842515       0.203708
     H       1.457967      0.262942       1.405899
     H       2.506909      0.737039       0.084536
     H      -1.673862      1.756421      -0.202115
     H      -1.122541      0.926431       1.274289
     H       0.670347      2.310100       0.182904
     H       0.502008      1.373989      -1.295713
Rotational constants (GHz):    4.6568600    3.3361500    2.1916000
Vibrational harmonic frequencies (cm-1):
    i1662.9852                  148.8091                  196.3964            
      312.7376                  352.9967                  423.9321            
      505.3282                  545.0496                  616.2727            
      782.2709                  800.5045                  863.9458            
      915.1046                  952.9774                  970.7800            
     1005.5482                 1048.8603                 1086.7051            
     1150.2405                 1194.1317                 1252.4852            
     1262.9784                 1311.3005                 1368.4238            
     1388.1606                 1397.1534                 1448.9722            
     1465.3793                 1473.4279                 1477.8660            
     1486.9747                 2977.1193                 3017.6362            
     3027.0627                 3035.1640                 3058.5923            
     3077.6666                 3085.7719                 3165.7810            
Zero-point correction (Hartree): 0.122225

#################################################################################
Z-1-butene-1-peroxy (B3LYP/6-31G(d,p) (5 d-orbitals) geometry)
#################################################################################

C4H7OO.1-5Hshift.Zm
-------------------
E(CBS-QB3) excl. ZPE (Hartree): -306.49829100 
E(CBS-QB3) inc. ZPE scaled by 0.99 (Hartree): -306.40083100 
E(CCSD(T)/6-31+(d')) (Hartree): -306.02995889 
E(CCSD/6-31+(d')) (Hartree): -305.99317087 
E(MP2/6-31+(d')) (Hartree): -305.93762356 
E(MP2/CBSB3) (Hartree): -306.27175589 
E(MP2/CBSB4) (Hartree): -305.99920391 
E(MP3/6-31+(d')) (Hartree): -305.96878022 
E(MP3/CBSB4) (Hartree): -306.03404671 
E(PMP2/6-31+(d')) (Hartree): -305.94905021 
E(PMP2/CBSB3) (Hartree): -306.28313438 
E(PMP2/CBSB4) (Hartree): -306.01028119 
E(PMP3/6-31+(d')) (Hartree): -305.97669332 
E(PMP3/CBSB4) (Hartree): -306.04170839 
E(PUHF/6-31+(d')) (Hartree): -305.05325863 
E(PUHF/CBSB3) (Hartree): -305.16169791 
E(PUHF/CBSB4) (Hartree): -305.06807969 
E(UB+HF-LYP/CBSB7) (Hartree): -306.97848161 
E(UHF/6-31+(d')) (Hartree): -305.03931271 
E(UHF/CBSB3) (Hartree): -305.14779885 
E(UHF/CBSB4) (Hartree): -305.05456171 
E(UB+HF-LYP/6-31G(d,p)) (Hartree): -306.89575463 
Electronic state : 2-A
Cartesian coordinates (Angs):
     C      -1.036929     -0.199766       0.346413
     C      -0.238871      1.024083       0.205459
     C       1.096351      1.004727      -0.010401
     O       1.829498     -0.101822      -0.248381
     O       1.162216     -1.308275       0.067624
     H      -1.006178     -0.659979       1.340397
     C      -2.410987     -0.211606      -0.284480
     H      -0.733230      1.991269       0.115293
     H       1.707177      1.889008      -0.162614
     H      -0.032526     -1.010635      -0.052082
     H      -2.369661      0.073492      -1.340479
     H      -3.086965      0.495422       0.219195
     H      -2.869712     -1.202427      -0.215598
Rotational constants (GHz):    7.0574000    2.4293900    1.9129100
Vibrational harmonic frequencies (cm-1):
    i1711.8102                  125.7670                  151.8440            
      214.4081                  332.3382                  458.2741            
      471.8343                  534.7210                  734.6695            
      801.4268                  859.6230                  904.1573            
      918.4321                  929.9488                 1060.3958            
     1074.7427                 1124.9448                 1166.5418            
     1254.4126                 1282.2653                 1335.3409            
     1418.5087                 1425.1405                 1498.3594            
     1503.3897                 1577.4724                 1639.9998            
     3014.8785                 3071.4222                 3090.2375            
     3128.1430                 3148.6087                 3222.9996            
Zero-point correction (Hartree): 0.099044

C4H7OO.1-5Hshift.Zp
-------------------
E(UB+HF-LYP/6-31G(d,p)) (Hartree): -306.89369489 
Electronic state : 2-A
Cartesian coordinates (Angs):
     C       1.093344      0.289905       0.561061
     C       0.070747      1.239334       0.085264
     C      -1.172679      0.849411      -0.264440
     O      -1.678901     -0.392993      -0.096016
     O      -0.697197     -1.373227       0.189753
     C       2.025688     -0.376987      -0.442655
     H       1.611644      0.624688       1.464532
     H       0.249734      2.312735       0.134363
     H      -1.962199      1.522380      -0.583907
     H       0.204683     -0.720496       0.695995
     H       2.707278      0.364379      -0.882388
     H       1.457412     -0.838507      -1.253980
     H       2.637634     -1.145394       0.040112
Rotational constants (GHz):    5.8699500    2.9900000    2.2087100
Vibrational harmonic frequencies (cm-1):
    i1690.1193                  130.2023                  201.9580            
      209.9396                  322.4468                  475.9387            
      516.8197                  568.0944                  721.5079            
      789.7972                  845.7858                  905.2638            
      916.6159                  925.2552                 1052.1813            
     1069.1498                 1090.9547                 1165.1584            
     1244.3762                 1255.8519                 1360.7016            
     1404.8631                 1415.9478                 1498.4610            
     1501.8605                 1580.6917                 1647.5000            
     3024.1328                 3094.0393                 3098.3439            
     3142.2570                 3154.5552                 3223.2363            
Zero-point correction (Hartree): 0.099223

C4H7OO.5yl
----------
E(UB+HF-LYP/6-31G(d,p)) (Hartree): -306.95786123 
Cartesian coordinates (Angs):
     C       1.571614     -0.448196      -0.048952
     C       1.128806      0.799591       0.064565
     C      -0.258205      1.123495       0.018592
     O      -1.079428      0.327304      -0.277604
     O      -4.178444     -0.750216       0.132838
     H       0.881135     -1.276823      -0.180461
     C       3.036282     -0.800937       0.054774
     H       1.780663      1.641832       0.279658
     H      -0.560597      2.148187       0.330090
     H      -3.163417     -0.415228      -0.055165
     H       3.697608      0.071379       0.048648
     H       3.318593     -1.461085      -0.772388
     H       3.238012     -1.368679       0.973875
Rotational constants (GHz):    8.3999101    0.9975262    0.9024165

C4H7OO.cZp
----------
E(UB+HF-LYP/6-31G(d,p)) (Hartree): -306.93142188 
Electronic state : 2-A
Cartesian coordinates (Angs):
     O      -1.133475     -1.327703       0.135842
     O      -1.807925     -0.195557      -0.058209
     C      -1.044378      0.946241      -0.229084
     C       0.249971      1.143568       0.055399
     C       1.268072      0.193430       0.622806
     C       2.050423     -0.561135      -0.469625
     H      -1.695353      1.727202      -0.607363
     H       0.596447      2.149582      -0.175716
     H       1.969805      0.772788       1.235089
     H       0.778169     -0.534431       1.273348
     H       2.546466      0.130603      -1.158717
     H       1.372584     -1.195138      -1.046458
     H       2.818550     -1.197156      -0.018223
Rotational constants (GHz):    5.9452800    2.5995000    2.0156500
Vibrational harmonic frequencies (cm-1):
       80.3462                  107.3196                  216.4073            
      268.3860                  285.5705                  403.4757            
      528.6988                  751.8914                  762.5928            
      832.4252                  861.3783                  947.9804            
      948.2648                 1031.9665                 1090.2276            
     1116.0050                 1181.3363                 1284.4813            
     1310.3702                 1350.4454                 1411.6386            
     1424.8014                 1492.6188                 1509.7555            
     1521.9745                 1670.3720                 3048.7013            
     3049.7746                 3110.9087                 3125.1144            
     3142.3659                 3166.5515                 3225.8381            
Zero-point correction (Hartree): 0.105388

C4H7OO.tZc
----------
E(UB+HF-LYP/6-31G(d,p)) (Hartree): -306.93301321 
Point group : CS
Electronic state : 2-A"
Cartesian coordinates (Angs):
     O       2.256100      1.157402       0.000000
     O       1.170626      0.386025       0.000000
     C       0.000000      1.125173       0.000000
     C      -1.211120      0.556392       0.000000
     C      -1.627465     -0.889752       0.000000
     C      -0.532224     -1.961005       0.000000
     H       0.184306      2.193669       0.000000
     H      -2.030936      1.272647       0.000000
     H      -2.284954     -1.038398       0.869617
     H      -2.284954     -1.038398      -0.869617
     H       0.108871     -1.883359       0.881730
     H       0.108871     -1.883359      -0.881730
     H      -0.990154     -2.955058       0.000000
Rotational constants (GHz):    7.1448800    2.2034200    1.7195000
Vibrational harmonic frequencies (cm-1):
       39.3254 (  A")           113.4449 (  A")           169.6196 (  A')     
      271.8510 (  A")           318.0566 (  A')           423.5298 (  A")     
      475.3719 (  A')           726.3702 (  A")           735.6046 (  A')     
      813.2265 (  A")           840.9525 (  A')           961.7576 (  A")     
      998.2045 (  A')          1047.2324 (  A')          1107.1960 (  A")     
     1127.0095 (  A')          1186.4809 (  A')          1264.1881 (  A')     
     1299.4383 (  A")          1384.4613 (  A')          1394.4330 (  A')     
     1436.6600 (  A')          1480.4250 (  A')          1514.9307 (  A")     
     1515.4932 (  A')          1706.6222 (  A')          3011.2165 (  A')     
     3030.9817 (  A")          3060.5691 (  A')          3129.9035 (  A')     
     3143.5967 (  A")          3168.9608 (  A')          3232.6317 (  A')     
Zero-point correction (Hartree): 0.105091

C4H7OO.tZp
----------
E(CBS-QB3) excl. ZPE (Hartree): -306.53723400 
E(CBS-QB3) inc. ZPE scaled by 0.99 (Hartree): -306.43376600 
E(CCSD(T)/6-31+(d')) (Hartree): -306.08322491 
E(CCSD/6-31+(d')) (Hartree): -306.05124548 
E(MP2/6-31+(d')) (Hartree): -305.98871305 
E(MP2/CBSB3) (Hartree): -306.31247765 
E(MP2/CBSB4) (Hartree): -306.04322860 
E(MP3/6-31+(d')) (Hartree): -306.02737219 
E(MP3/CBSB4) (Hartree): -306.08626304 
E(PMP2/6-31+(d')) (Hartree): -305.99433184 
E(PMP2/CBSB3) (Hartree): -306.31837606 
E(PMP2/CBSB4) (Hartree): -306.04881636 
E(PMP3/6-31+(d')) (Hartree): -306.03144004 
E(PMP3/CBSB4) (Hartree): -306.09030558 
E(PUHF/6-31+(d')) (Hartree): -305.12909785 
E(PUHF/CBSB3) (Hartree): -305.23246863 
E(PUHF/CBSB4) (Hartree): -305.13896853 
E(UB+HF-LYP/CBSB7) (Hartree): -307.01905494 
E(UHF/6-31+(d')) (Hartree): -305.12230773 
E(UHF/CBSB3) (Hartree): -305.22524265 
E(UHF/CBSB4) (Hartree): -305.13221200 
E(UB+HF-LYP/6-31G(d,p)) (Hartree): -306.93612428 
Electronic state : 2-A
Cartesian coordinates (Angs):
     O      -2.736162     -0.424300      -0.155364
     O      -1.431431     -0.463079       0.105127
     C      -0.808637      0.755223      -0.106992
     C       0.504756      0.885919       0.104711
     C       1.447477     -0.192284       0.559471
     C       2.599337     -0.421492      -0.434602
     H      -1.490037      1.528937      -0.441379
     H       0.923083      1.872221      -0.085942
     H       1.869349      0.099379       1.531524
     H       0.899648     -1.124541       0.722778
     H       3.170771      0.498526      -0.599486
     H       2.220119     -0.758184      -1.404222
     H       3.290216     -1.181504      -0.056901
Rotational constants (GHz):   10.8121200    1.6087800    1.5026500
Vibrational harmonic frequencies (cm-1):
       56.1377                  117.9136                  171.8682            
      242.8948                  282.4111                  439.8534            
      499.0788                  664.1779                  770.5951            
      808.3976                  879.9601                  955.9219            
      999.6737                 1027.4184                 1092.0844            
     1154.3179                 1198.7677                 1248.9555            
     1298.1499                 1340.2063                 1399.9928            
     1425.3878                 1497.1105                 1511.4420            
     1519.5446                 1702.5671                 3029.7457            
     3047.8559                 3102.9868                 3122.8365            
     3128.4588                 3176.9628                 3239.2157            
Zero-point correction (Hartree): 0.105144

#################################################################################
Z-2-butene-1-peroxy (M05-2X/6-311G(d,p) geometry)
#################################################################################

C4H7OO.1-6Hshift.a
------------------
IRC pathway available
E(UM052X+HF-M052X/6-311G(d,p)) (Hartree): -306.91300384 
Electronic state : 2-A
Cartesian coordinates (Angs):
     O       0.872397     -1.183714      -0.611212
     H      -0.323328     -1.345365      -0.351989
     C      -1.383024     -0.951301       0.303947
     O       1.285632     -0.384329       0.428745
     C      -1.471911      0.456187      -0.095100
     C       1.003793      0.979193       0.133652
     C      -0.430464      1.295637      -0.155175
     H      -0.946866     -1.149894       1.279413
     H      -2.245480     -1.564773       0.072425
     H      -2.432063      0.820947      -0.440526
     H       1.355715      1.515595       1.016506
     H       1.612728      1.285838      -0.722254
     H      -0.595314      2.303703      -0.517785
Rotational constants (GHz):    5.1110900    3.7729100    2.4767500
Vibrational harmonic frequencies (cm-1):
    i1990.9789                  147.9404                  292.9274            
      346.8788                  419.4836                  461.1550            
      610.7411                  622.0102                  703.3340            
      805.2612                  878.9796                  968.4735            
      988.2555                 1011.7523                 1030.4321            
     1061.9184                 1096.0277                 1165.4506            
     1236.4169                 1268.2986                 1304.9183            
     1403.0383                 1437.9823                 1479.7264            
     1483.7412                 1608.2584                 1694.3966            
     3074.2725                 3119.1530                 3134.4672            
     3191.4013                 3210.7157                 3232.6677            
Zero-point correction (Hartree): 0.101357

limit.F
-------
E(CBS-QB3) excl. ZPE (Hartree): -306.53291700 
E(CBS-QB3) inc. ZPE scaled by 0.99 (Hartree): -306.42844600 
E(CCSD(T)/6-31+(d')) (Hartree): -306.06609375 
E(CCSD/6-31+(d')) (Hartree): -306.03560015 
E(MP2/6-31+(d')) (Hartree): -305.97384900 
E(MP2/CBSB3) (Hartree): -306.30833670 
E(MP2/CBSB4) (Hartree): -306.03605511 
E(MP3/6-31+(d')) (Hartree): -306.01310405 
E(MP3/CBSB4) (Hartree): -306.07897643 
E(PMP2/6-31+(d')) (Hartree): -305.98771380 
E(PMP2/CBSB3) (Hartree): -306.32222689 
E(PMP2/CBSB4) (Hartree): -306.04983296 
E(PMP3/6-31+(d')) (Hartree): -306.02326322 
E(PMP3/CBSB4) (Hartree): -306.08906037 
E(PUHF/6-31+(d')) (Hartree): -305.12621979 
E(PUHF/CBSB3) (Hartree): -305.23594375 
E(PUHF/CBSB4) (Hartree): -305.14359448 
E(UHF/6-31+(d')) (Hartree): -305.10973582 
E(UHF/CBSB3) (Hartree): -305.21941749 
E(UHF/CBSB4) (Hartree): -305.12721260 
E(UM052X+HF-M052X/6-311G(d,p)) (Hartree): -306.95098208 
Cartesian coordinates (Angs):
     O       1.514531     -0.810521      -0.747473
     H       0.671142     -1.192639      -1.023194
     C      -1.681841     -0.940290       0.406701
     O       1.215512     -0.373398       0.569140
     C      -1.576535      0.221528      -0.329624
     C       0.743257      0.965506       0.477417
     C      -0.512402      1.113700      -0.324880
     H      -0.901524     -1.257394       1.080480
     H      -2.570189     -1.548439       0.331802
     H      -2.406949      0.473438      -0.979455
     H       0.584379      1.244465       1.523290
     H       1.531911      1.593695       0.061473
     H      -0.583978      1.995552      -0.945425
Rotational constants (GHz):    5.5269300    2.8269300    2.3574900
Vibrational harmonic frequencies (cm-1):
       35.0147                  156.5666                  247.5231            
      298.1915                  340.5714                  391.1584            
      475.0790                  548.4716                  683.2737            
      760.8820                  883.1252                  897.9866            
      938.9902                 1014.4509                 1036.0563            
     1073.0379                 1092.8239                 1200.9318            
     1253.7495                 1303.8095                 1405.0713            
     1432.3282                 1449.5939                 1484.7481            
     1498.5520                 1544.9107                 3060.7725            
     3110.4467                 3192.2027                 3197.5813            
     3225.9098                 3298.4363                 3788.5007            
Zero-point correction (Hartree): 0.105526

limit.R
-------
E(CBS-QB3) excl. ZPE (Hartree): -306.53384200 
E(CBS-QB3) inc. ZPE scaled by 0.99 (Hartree): -306.42840900 
E(CCSD(T)/6-31+(d')) (Hartree): -306.07933964 
E(CCSD/6-31+(d')) (Hartree): -306.04808287 
E(MP2/6-31+(d')) (Hartree): -305.98746926 
E(MP2/CBSB3) (Hartree): -306.31180822 
E(MP2/CBSB4) (Hartree): -306.04179202 
E(MP3/6-31+(d')) (Hartree): -306.02614174 
E(MP3/CBSB4) (Hartree): -306.08483447 
E(PMP2/6-31+(d')) (Hartree): -305.99107533 
E(PMP2/CBSB3) (Hartree): -306.31572334 
E(PMP2/CBSB4) (Hartree): -306.04535568 
E(PMP3/6-31+(d')) (Hartree): -306.02861622 
E(PMP3/CBSB4) (Hartree): -306.08727175 
E(PUHF/6-31+(d')) (Hartree): -305.12575846 
E(PUHF/CBSB3) (Hartree): -305.22883600 
E(PUHF/CBSB4) (Hartree): -305.13557326 
E(UHF/6-31+(d')) (Hartree): -305.12090083 
E(UHF/CBSB3) (Hartree): -305.22338086 
E(UHF/CBSB4) (Hartree): -305.13074257 
E(UM052X+HF-M052X/6-311G(d,p)) (Hartree): -306.95291335 
Cartesian coordinates (Angs):
     O       2.072287     -0.284171      -0.740571
     H      -2.067266     -1.540902      -0.803362
     C      -1.992339     -0.867285       0.052318
     O       1.292268     -0.667139       0.223128
     C      -1.536061      0.482436      -0.406948
     C       0.624243      0.472534       0.839687
     C      -0.394061      1.078779      -0.079597
     H      -1.307402     -1.318950       0.765792
     H      -2.985182     -0.804266       0.500456
     H      -2.199367      0.999853      -1.091572
     H       0.181705      0.053451       1.740105
     H       1.403304      1.181683       1.105738
     H      -0.152924      2.040821      -0.510379
Rotational constants (GHz):    6.7129800    2.2281500    2.0409700
Vibrational harmonic frequencies (cm-1):
       32.6629                   95.2598                  127.9231            
      230.3299                  316.2103                  441.3729            
      523.0288                  632.8898                  751.3320            
      899.8719                  931.7977                 1005.5670            
     1013.7015                 1045.8778                 1084.0184            
     1166.3299                 1233.3296                 1279.9592            
     1321.0061                 1392.3268                 1419.4139            
     1449.7663                 1499.8266                 1505.1521            
     1526.0492                 1756.4309                 3075.2947            
     3120.3536                 3125.0358                 3166.0237            
     3177.1216                 3182.7068                 3219.3480            
Zero-point correction (Hartree): 0.106498

#################################################################################
Z-2-butene-1-peroxy (B3LYP/6-31G(d,p) (5 d-orbitals) geometry)
#################################################################################

C4H7OO.1-6Hshift.a
------------------
E(CBS-QB3) excl. ZPE (Hartree): -306.49647900 
E(CBS-QB3) inc. ZPE scaled by 0.99 (Hartree): -306.39842100 
E(CCSD(T)/6-31+(d')) (Hartree): -306.02928867 
E(CCSD/6-31+(d')) (Hartree): -305.99401581 
E(MP2/6-31+(d')) (Hartree): -305.93070752 
E(MP2/CBSB3) (Hartree): -306.26304943 
E(MP2/CBSB4) (Hartree): -305.99203395 
E(MP3/6-31+(d')) (Hartree): -305.96624455 
E(MP3/CBSB4) (Hartree): -306.03133139 
E(PMP2/6-31+(d')) (Hartree): -305.94868153 
E(PMP2/CBSB3) (Hartree): -306.28102745 
E(PMP2/CBSB4) (Hartree): -306.00965440 
E(PMP3/6-31+(d')) (Hartree): -305.97963280 
E(PMP3/CBSB4) (Hartree): -306.04443792 
E(PUHF/6-31+(d')) (Hartree): -305.06768353 
E(PUHF/CBSB3) (Hartree): -305.17391313 
E(PUHF/CBSB4) (Hartree): -305.08193880 
E(UB+HF-LYP/CBSB7) (Hartree): -306.97579339 
E(UHF/6-31+(d')) (Hartree): -305.04669510 
E(UHF/CBSB3) (Hartree): -305.15290227 
E(UHF/CBSB4) (Hartree): -305.06135683 
E(UB+HF-LYP/6-31G(d,p)) (Hartree): -306.89252325 
Electronic state : 2-A
Cartesian coordinates (Angs):
     O       0.884589     -1.203877      -0.613267
     H      -0.295724     -1.340114      -0.337226
     C      -1.400673     -0.954240       0.308930
     O       1.318067     -0.370098       0.429349
     C      -1.490395      0.446045      -0.096299
     C       0.998607      0.991284       0.131452
     C      -0.442502      1.298681      -0.156038
     H      -0.949122     -1.156379       1.282624
     H      -2.268699     -1.576215       0.096368
     H      -2.449604      0.805096      -0.466634
     H       1.353625      1.533475       1.018750
     H       1.607427      1.327005      -0.722737
     H      -0.609370      2.308315      -0.528070
Rotational constants (GHz):    5.0459500    3.6845500    2.4262300
Vibrational harmonic frequencies (cm-1):
    i1860.9588                  155.1040                  277.4931            
      343.6428                  411.7823                  448.4395            
      607.1101                  620.1090                  694.5392            
      793.0862                  856.1951                  932.3295            
      950.5229                  994.8687                 1011.5700            
     1019.4289                 1058.3550                 1141.6276            
     1207.3010                 1258.0475                 1274.4358            
     1378.8244                 1423.7702                 1456.3147            
     1476.1533                 1583.0841                 1643.7473            
     3002.9575                 3057.5326                 3100.8769            
     3151.1701                 3172.6042                 3194.7109            
Zero-point correction (Hartree): 0.099551

C4H7OOH.6yl
-----------
E(CBS-QB3) excl. ZPE (Hartree): -306.53310200 
E(CBS-QB3) inc. ZPE scaled by 0.99 (Hartree): -306.43100700 
E(CCSD(T)/6-31+(d')) (Hartree): -306.06760442 
E(CCSD/6-31+(d')) (Hartree): -306.03660039 
E(MP2/6-31+(d')) (Hartree): -305.97461949 
E(MP2/CBSB3) (Hartree): -306.30804762 
E(MP2/CBSB4) (Hartree): -306.03672252 
E(MP3/6-31+(d')) (Hartree): -306.01339507 
E(MP3/CBSB4) (Hartree): -306.07914564 
E(PMP2/6-31+(d')) (Hartree): -305.98867078 
E(PMP2/CBSB3) (Hartree): -306.32212437 
E(PMP2/CBSB4) (Hartree): -306.05068600 
E(PMP3/6-31+(d')) (Hartree): -306.02371925 
E(PMP3/CBSB4) (Hartree): -306.08939402 
E(PUHF/6-31+(d')) (Hartree): -305.12481990 
E(PUHF/CBSB3) (Hartree): -305.23402057 
E(PUHF/CBSB4) (Hartree): -305.14222194 
E(UB+HF-LYP/CBSB7) (Hartree): -307.00717547 
E(UHF/6-31+(d')) (Hartree): -305.10814007 
E(UHF/CBSB3) (Hartree): -305.21729849 
E(UHF/CBSB4) (Hartree): -305.12564518 
E(UB+HF-LYP/6-31G(d,p)) (Hartree): -306.92172460 
Electronic state : 2-A
Cartesian coordinates (Angs):
     O       1.496361     -0.889529      -0.725896
     H       0.635547     -1.308452      -0.907173
     C      -1.666266     -0.981672       0.395848
     O       1.244107     -0.319736       0.585680
     C      -1.602835      0.224907      -0.283457
     C       0.776288      1.011848       0.388856
     C      -0.548319      1.137845      -0.309037
     H      -0.856172     -1.324198       1.028912
     H      -2.556195     -1.598717       0.332953
     H      -2.475363      0.500636      -0.875633
     H       0.722578      1.400228       1.418308
     H       1.537291      1.595637      -0.145884
     H      -0.684636      2.051417      -0.883022
Rotational constants (GHz):    5.3547500    2.8342700    2.2754200
Vibrational harmonic frequencies (cm-1):
       64.5912                  146.1456                  247.6060            
      310.9242                  326.1065                  369.0180            
      463.4601                  554.4043                  668.9607            
      747.8198                  831.7361                  861.2484            
      886.5468                  982.4162                 1005.9770            
     1049.4255                 1065.8000                 1184.7003            
     1254.3479                 1278.6807                 1388.7193            
     1398.7194                 1437.9989                 1462.6007            
     1485.4149                 1532.5368                 3005.8700            
     3055.0678                 3146.1488                 3173.8221            
     3182.8600                 3275.6566                 3699.2337            
Zero-point correction (Hartree): 0.103758

C4H7OO.mcZ
----------
E(UB+HF-LYP/6-31G(d,p)) (Hartree): -306.93112459 
Electronic state : 2-A
Cartesian coordinates (Angs):
     O       2.721401     -0.458921      -0.049860
     O       1.604444      0.096201      -0.484496
     C       0.562172      0.057528       0.556401
     C      -0.569638      0.921319       0.106465
     C      -1.822324      0.523705      -0.149262
     C      -2.397609     -0.859939      -0.062331
     H       0.289003     -0.989984       0.699479
     H       1.033588      0.429868       1.471405
     H      -0.323540      1.974621      -0.013030
     H      -2.530996      1.293867      -0.453724
     H      -1.660235     -1.621488       0.200498
     H      -3.201532     -0.897060       0.683427
     H      -2.848659     -1.143743      -1.020842
Rotational constants (GHz):   10.1660700    1.5959300    1.4789900
Vibrational harmonic frequencies (cm-1):
       43.4867                   60.5170                  149.9891            
      226.3202                  281.6931                  435.4219            
      485.2936                  572.9557                  724.2552            
      889.1994                  942.5667                  993.8757            
     1012.4011                 1034.9593                 1071.3662            
     1150.0705                 1195.1599                 1225.1521            
     1297.9325                 1353.6057                 1421.0193            
     1448.9853                 1493.0872                 1495.1791            
     1509.6770                 1744.3966                 3039.6248            
     3073.6771                 3088.6309                 3130.7102            
     3141.2220                 3152.2158                 3177.9264            
Zero-point correction (Hartree): 0.104938

C4H7OO.mmZ
----------
E(CBS-QB3) excl. ZPE (Hartree): -306.53487300 
E(CBS-QB3) inc. ZPE scaled by 0.99 (Hartree): -306.43141000 
E(CCSD(T)/6-31+(d')) (Hartree): -306.08163703 
E(CCSD/6-31+(d')) (Hartree): -306.04999283 
E(MP2/6-31+(d')) (Hartree): -305.98918283 
E(MP2/CBSB3) (Hartree): -306.31254614 
E(MP2/CBSB4) (Hartree): -306.04348540 
E(MP3/6-31+(d')) (Hartree): -306.02757003 
E(MP3/CBSB4) (Hartree): -306.08624417 
E(PMP2/6-31+(d')) (Hartree): -305.99206582 
E(PMP2/CBSB3) (Hartree): -306.31577271 
E(PMP2/CBSB4) (Hartree): -306.04636557 
E(PMP3/6-31+(d')) (Hartree): -306.02941229 
E(PMP3/CBSB4) (Hartree): -306.08808366 
E(PUHF/6-31+(d')) (Hartree): -305.12570432 
E(PUHF/CBSB3) (Hartree): -305.22862998 
E(PUHF/CBSB4) (Hartree): -305.13554956 
E(UB+HF-LYP/CBSB7) (Hartree): -307.01515547 
E(UHF/6-31+(d')) (Hartree): -305.12125727 
E(UHF/CBSB3) (Hartree): -305.22353567 
E(UHF/CBSB4) (Hartree): -305.13110188 
E(UB+HF-LYP/6-31G(d,p)) (Hartree): -306.93165052 
Electronic state : 2-A
Cartesian coordinates (Angs):
     O      -2.567180      0.354482      -0.110327
     O      -1.658275     -0.555775      -0.413777
     C      -0.517195     -0.483230       0.512063
     C       0.340005      0.700486       0.195941
     C       1.649023      0.691092      -0.080601
     C       2.579183     -0.485893      -0.148746
     H      -0.946862     -0.426185       1.516987
     H      -0.009153     -1.440030       0.379497
     H      -0.194407      1.647966       0.209893
     H       2.118180      1.655656      -0.274337
     H       2.076657     -1.445305      -0.005756
     H       3.089287     -0.513789      -1.119137
     H       3.363849     -0.402698       0.613750
Rotational constants (GHz):   11.0991600    1.6443400    1.5275300
Vibrational harmonic frequencies (cm-1):
       55.1176                   86.8381                  147.1043            
      249.2747                  270.9383                  424.9811            
      536.0962                  580.4708                  735.9370            
      867.1924                  910.1552                  993.7898            
     1015.1722                 1031.6939                 1069.5665            
     1152.7763                 1177.3479                 1272.9759            
     1291.4903                 1350.4025                 1419.9308            
     1441.7788                 1481.6185                 1492.9958            
     1505.2971                 1745.1462                 3038.8677            
     3075.2824                 3087.7945                 3131.0109            
     3149.8184                 3152.1422                 3184.1028            
Zero-point correction (Hartree): 0.105081

C4H7OO.mpZ
----------
E(UB+HF-LYP/6-31G(d,p)) (Hartree): -306.93133821 
Electronic state : 2-A
Cartesian coordinates (Angs):
     O      -1.474909      1.202175      -0.355194
     O      -1.810001     -0.046974      -0.091300
     C      -0.725677     -0.739940       0.636592
     C       0.411030     -1.097344      -0.267045
     C       1.552035     -0.407796      -0.396676
     C       1.955496      0.856703       0.302231
     H      -0.438712     -0.084669       1.459822
     H      -1.226463     -1.628670       1.030932
     H       0.267230     -1.986572      -0.876929
     H       2.287607     -0.798975      -1.100169
     H       1.174106      1.255664       0.950444
     H       2.865820      0.701188       0.894981
     H       2.192389      1.630693      -0.437734
Rotational constants (GHz):    5.9738300    2.4117100    1.9554400
Vibrational harmonic frequencies (cm-1):
       53.7731                   89.1965                  139.0926            
      261.7290                  284.3475                  428.5731            
      554.3417                  564.7395                  735.4176            
      855.2054                  900.6103                 1006.2067            
     1009.7463                 1022.7652                 1071.2163            
     1153.8785                 1175.1722                 1270.0166            
     1299.5648                 1356.9988                 1415.7723            
     1444.8874                 1487.6565                 1488.3951            
     1509.8452                 1735.6866                 3038.8341            
     3087.7924                 3088.1378                 3138.5717            
     3154.8660                 3158.2878                 3180.4689            
Zero-point correction (Hartree): 0.105164

C4H7OO.pcZ
----------
E(UB+HF-LYP/6-31G(d,p)) (Hartree): -306.93112452 
Electronic state : 2-A
Cartesian coordinates (Angs):
     O      -2.720937     -0.460625      -0.050257
     O      -1.605437      0.098532      -0.483681
     C      -0.562272      0.057595       0.556178
     C       0.569813      0.921152       0.106446
     C       1.822559      0.523553      -0.149021
     C       2.397752     -0.860186      -0.062629
     H      -1.032342      0.429173       1.472188
     H      -0.289767     -0.990309       0.697610
     H       0.323858      1.974513      -0.012832
     H       2.531351      1.293829      -0.452888
     H       1.660132     -1.621952       0.198748
     H       2.849651     -1.143196      -1.020977
     H       3.201003     -0.897989       0.683813
Rotational constants (GHz):   10.1626000    1.5958400    1.4787000
Vibrational harmonic frequencies (cm-1):
       43.7513                   61.2916                  149.6484            
      226.2732                  281.5796                  435.2569            
      485.2430                  572.9853                  724.1588            
      889.2895                  942.6756                  993.7205            
     1012.3702                 1034.9579                 1071.3306            
     1150.1050                 1194.9332                 1225.0437            
     1297.9533                 1353.6186                 1421.0123            
     1448.9867                 1493.0712                 1495.1617            
     1509.6212                 1744.4099                 3039.6697            
     3073.6225                 3088.6385                 3130.8261            
     3141.3214                 3152.2991                 3177.9173            
Zero-point correction (Hartree): 0.104939

C4H7OO.pmZ
----------
E(UB+HF-LYP/6-31G(d,p)) (Hartree): -306.93133826 
Electronic state : 2-A
Cartesian coordinates (Angs):
     O       1.476294      1.201647      -0.355670
     O       1.810480     -0.047514      -0.090640
     C       0.725222     -0.739258       0.636972
     C      -0.410942     -1.096690      -0.267318
     C      -1.552230     -0.407645      -0.397077
     C      -1.956581      0.856347       0.302252
     H       1.225157     -1.627986       1.032416
     H       0.437981     -0.083176       1.459450
     H      -0.266449     -1.985562      -0.877562
     H      -2.287350     -0.798886      -1.101004
     H      -1.175171      1.256081       0.949973
     H      -2.194889      1.630142      -0.437453
     H      -2.866286      0.699790       0.895686
Rotational constants (GHz):    5.9770900    2.4097300    1.9547900
Vibrational harmonic frequencies (cm-1):
       53.4411                   89.2761                  139.2085            
      261.6920                  284.4639                  428.5505            
      554.2465                  564.7422                  735.4242            
      855.2631                  900.6810                 1006.2207            
     1009.7367                 1022.7806                 1071.2154            
     1153.8737                 1175.1424                 1269.9961            
     1299.5670                 1356.9602                 1415.7761            
     1444.8938                 1487.6577                 1488.4251            
     1509.8769                 1735.7230                 3038.8287            
     3087.8098                 3088.0962                 3138.5739            
     3154.8847                 3158.2784                 3180.4510            
Zero-point correction (Hartree): 0.105164

C4H7OO.ppZ
----------
E(UB+HF-LYP/6-31G(d,p)) (Hartree): -306.93165052 
Electronic state : 2-A
Cartesian coordinates (Angs):
     O       2.567254      0.354224      -0.110778
     O       1.658032     -0.555888      -0.413706
     C       0.517284     -0.482823       0.512527
     C      -0.340049      0.700685       0.196103
     C      -1.649029      0.691006      -0.080730
     C      -2.579076     -0.486075      -0.148891
     H       0.009162     -1.439689       0.380736
     H       0.947344     -0.425203       1.517255
     H       0.194029      1.648351       0.210077
     H      -2.118256      1.655495      -0.274684
     H      -2.076164     -1.445555      -0.007701
     H      -3.362722     -0.403875       0.614760
     H      -3.090462     -0.512971      -1.118627
Rotational constants (GHz):   11.0971800    1.6443600    1.5276000
Vibrational harmonic frequencies (cm-1):
       55.1452                   86.7647                  147.2144            
      249.3216                  270.9418                  425.0615            
      536.1355                  580.4498                  735.9434            
      867.1487                  910.1536                  993.7930            
     1015.1373                 1031.7247                 1069.5759            
     1152.7850                 1177.3714                 1272.9897            
     1291.5384                 1350.4100                 1419.9138            
     1441.7913                 1481.6358                 1493.0134            
     1505.3007                 1745.0613                 3038.8799            
     3075.2613                 3087.8362                 3130.9991            
     3149.8139                 3152.1197                 3184.1003            
Zero-point correction (Hartree): 0.105081

C4H7OO.tmZ
----------
E(UB+HF-LYP/6-31G(d,p)) (Hartree): -306.93112466 
Electronic state : 2-A
Cartesian coordinates (Angs):
     O      -2.720683     -0.459780      -0.050024
     O      -1.603968      0.095868      -0.484606
     C      -0.562314      0.059255       0.557002
     C       0.569898      0.921955       0.105985
     C       1.822225      0.523256      -0.149824
     C       2.396587     -0.860698      -0.061825
     H      -1.034215      0.433582       1.470940
     H      -0.289383     -0.987986       0.702447
     H       0.324471      1.975305      -0.014454
     H       2.531323      1.292644      -0.455256
     H       1.658833     -1.621479       0.202135
     H       2.846896     -1.145747      -1.020314
     H       3.200908     -0.897627       0.683512
Rotational constants (GHz):   10.1546100    1.5966600    1.4794900
Vibrational harmonic frequencies (cm-1):
       43.5329                   60.5940                  149.9017            
      226.3510                  281.7674                  435.4167            
      485.3255                  572.9810                  724.2947            
      889.1857                  942.5763                  993.8227            
     1012.4137                 1034.9690                 1071.3707            
     1150.0852                 1195.1555                 1225.1643            
     1297.9515                 1353.6709                 1421.0160            
     1448.9841                 1493.0827                 1495.1882            
     1509.7123                 1744.3811                 3039.6441            
     3073.7312                 3088.6429                 3130.7773            
     3141.2871                 3152.2267                 3177.9305            
Zero-point correction (Hartree): 0.104940

C4H7OO.tpZ
----------
E(UB+HF-LYP/6-31G(d,p)) (Hartree): -306.93112465 
Electronic state : 2-A
Cartesian coordinates (Angs):
     O       2.720852     -0.459504      -0.049948
     O       1.603976      0.095714      -0.484665
     C       0.562298      0.058990       0.556915
     C      -0.569843      0.921856       0.106045
     C      -1.822230      0.523337      -0.149733
     C      -2.396769     -0.860552      -0.061875
     H       0.289282     -0.988260       0.702155
     H       1.034220      0.433104       1.470929
     H      -0.324305      1.975191      -0.014297
     H      -2.531244      1.292853      -0.455036
     H      -1.659159     -1.621424       0.202222
     H      -3.201253     -0.897400       0.683287
     H      -2.846907     -1.145535      -1.020466
Rotational constants (GHz):   10.1568500    1.5965300    1.4794200
Vibrational harmonic frequencies (cm-1):
       43.5087                   60.5631                  149.9085            
      226.3431                  281.7492                  435.4295            
      485.3185                  572.9686                  724.2985            
      889.1797                  942.5649                  993.8451            
     1012.4201                 1034.9656                 1071.3691            
     1150.0792                 1195.1540                 1225.1739            
     1297.9577                 1353.6615                 1421.0165            
     1448.9851                 1493.0818                 1495.1888            
     1509.7069                 1744.3971                 3039.6455            
     3073.7271                 3088.6401                 3130.7682            
     3141.2758                 3152.2247                 3177.9294            
Zero-point correction (Hartree): 0.104939

#################################################################################
Z-2-butene-1-peroxy (B3LYP/6-31+G(d,p) (5 d-orbitals) geometry)
#################################################################################

C4H7OO.1-6Hshift.a
------------------
IRC pathway available
E(UB+HF-LYP/6-31+G(d,p)) (Hartree): -306.91314736 
Electronic state : 2-A
Cartesian coordinates (Angs):
     O       0.879146     -1.216419      -0.606331
     H      -0.314069     -1.344635      -0.330108
     C      -1.413051     -0.948377       0.307159
     O       1.325020     -0.373046       0.425230
     C      -1.490380      0.454578      -0.094692
     C       1.006082      0.991914       0.128316
     C      -0.435197      1.301890      -0.154689
     H      -0.975923     -1.159737       1.286128
     H      -2.282434     -1.563350       0.079306
     H      -2.446186      0.822084      -0.465635
     H       1.364274      1.528035       1.017414
     H       1.615592      1.321569      -0.727236
     H      -0.599301      2.311726      -0.527622
Rotational constants (GHz):    5.0279900    3.6684900    2.4100700
Vibrational harmonic frequencies (cm-1):
    i1856.6814                  151.7686                  272.9573            
      342.7899                  412.4157                  447.0455            
      603.5859                  613.3233                  693.8446            
      790.6281                  849.0156                  923.8103            
      951.1297                  993.4558                 1007.0178            
     1017.4756                 1053.3486                 1136.2307            
     1209.3182                 1255.5608                 1268.6838            
     1372.7846                 1419.3568                 1447.4340            
     1469.0107                 1562.9508                 1632.1321            
     3005.0883                 3061.7445                 3093.2987            
     3148.8149                 3170.0567                 3188.2042            
Zero-point correction (Hartree): 0.099247

limit.F
-------
E(CBS-QB3) excl. ZPE (Hartree): -306.53271800 
E(CBS-QB3) inc. ZPE scaled by 0.99 (Hartree): -306.43062300 
E(CCSD(T)/6-31+(d')) (Hartree): -306.06833365 
E(CCSD/6-31+(d')) (Hartree): -306.03724944 
E(MP2/6-31+(d')) (Hartree): -305.97486531 
E(MP2/CBSB3) (Hartree): -306.30728130 
E(MP2/CBSB4) (Hartree): -306.03688091 
E(MP3/6-31+(d')) (Hartree): -306.01342784 
E(MP3/CBSB4) (Hartree): -306.07913820 
E(PMP2/6-31+(d')) (Hartree): -305.98927495 
E(PMP2/CBSB3) (Hartree): -306.32173415 
E(PMP2/CBSB4) (Hartree): -306.05120128 
E(PMP3/6-31+(d')) (Hartree): -306.02408547 
E(PMP3/CBSB4) (Hartree): -306.08971908 
E(PUHF/6-31+(d')) (Hartree): -305.12564840 
E(PUHF/CBSB3) (Hartree): -305.23429985 
E(PUHF/CBSB4) (Hartree): -305.14295650 
E(UB+HF-LYP/6-31+G(d,p)) (Hartree): -306.94496076 
E(UHF/6-31+(d')) (Hartree): -305.10861911 
E(UHF/CBSB3) (Hartree): -305.21720967 
E(UHF/CBSB4) (Hartree): -305.12603188 
Cartesian coordinates (Angs):
     O       2.013745     -0.358482      -0.732572
     H       1.465777     -0.817288      -1.391451
     C      -2.005415     -0.914902       0.159387
     O       1.233347     -0.572077       0.477157
     C      -1.673568      0.292669      -0.431642
     C       0.557904      0.662221       0.781360
     C      -0.518944      1.043295      -0.193587
     H      -1.348027     -1.406849       0.868438
     H      -2.939427     -1.411599      -0.080452
     H      -2.377908      0.704423      -1.154015
     H       0.145300      0.448051       1.776867
     H       1.302090      1.459573       0.877942
     H      -0.384399      1.968453      -0.747126
Rotational constants (GHz):    6.3895000    2.2033800    2.0523800
Vibrational harmonic frequencies (cm-1):
       27.7059                  130.7976                  196.7282            
      239.9949                  286.3786                  364.0679            
      480.8631                  530.5972                  629.5298            
      738.8645                  826.4046                  863.9925            
      887.8981                  968.6933                  995.1874            
     1026.3862                 1076.1877                 1188.3105            
     1244.8595                 1275.3221                 1354.1258            
     1370.1012                 1431.4850                 1470.1472            
     1474.4687                 1536.5314                 3034.3100            
     3093.0419                 3148.5182                 3168.8997            
     3191.9225                 3263.7816                 3751.1663            
Zero-point correction (Hartree): 0.103126

limit.R
-------
E(CBS-QB3) excl. ZPE (Hartree): -306.53469900 
E(CBS-QB3) inc. ZPE scaled by 0.99 (Hartree): -306.43099100 
E(CCSD(T)/6-31+(d')) (Hartree): -306.08203481 
E(CCSD/6-31+(d')) (Hartree): -306.05016040 
E(MP2/6-31+(d')) (Hartree): -305.98916069 
E(MP2/CBSB3) (Hartree): -306.31205776 
E(MP2/CBSB4) (Hartree): -306.04339987 
E(MP3/6-31+(d')) (Hartree): -306.02741209 
E(MP3/CBSB4) (Hartree): -306.08601111 
E(PMP2/6-31+(d')) (Hartree): -305.99216703 
E(PMP2/CBSB3) (Hartree): -306.31535715 
E(PMP2/CBSB4) (Hartree): -306.04639379 
E(PMP3/6-31+(d')) (Hartree): -306.02936819 
E(PMP3/CBSB4) (Hartree): -306.08795598 
E(PUHF/6-31+(d')) (Hartree): -305.12497063 
E(PUHF/CBSB3) (Hartree): -305.22758574 
E(PUHF/CBSB4) (Hartree): -305.13479707 
E(UB+HF-LYP/6-31+G(d,p)) (Hartree): -306.95263414 
E(UHF/6-31+(d')) (Hartree): -305.12047151 
E(UHF/CBSB3) (Hartree): -305.22246746 
E(UHF/CBSB4) (Hartree): -305.13030226 
Cartesian coordinates (Angs):
     O       2.601554      0.295953      -0.160711
     H      -3.036038     -0.593547      -1.143449
     C      -2.558669     -0.523137      -0.158536
     O       1.620172     -0.556012      -0.403552
     C      -1.662249      0.680955      -0.101474
     C       0.521857     -0.413094       0.572921
     C      -0.357931      0.738485       0.204949
     H      -2.036968     -1.464388       0.029626
     H      -3.368450     -0.434217       0.576562
     H      -2.152218      1.626420      -0.334241
     H       0.017135     -1.379482       0.533469
     H       1.002505     -0.278345       1.545976
     H       0.142187      1.704780       0.198996
Rotational constants (GHz):   10.8995900    1.6369900    1.5289700
Vibrational harmonic frequencies (cm-1):
       49.0433                   72.9337                  144.2305            
      250.7063                  269.3422                  428.9944            
      533.6429                  571.4479                  734.2338            
      852.7408                  902.8677                  992.8770            
     1009.4844                 1027.2236                 1066.5171            
     1146.5343                 1173.3825                 1271.6540            
     1292.3740                 1345.3098                 1413.5906            
     1437.3823                 1476.5754                 1485.4967            
     1498.1046                 1727.1322                 3034.3750            
     3081.5816                 3082.4058                 3126.4196            
     3149.1604                 3154.1019                 3180.5660            
Zero-point correction (Hartree): 0.104756

#################################################################################
Z-2-butene-1-peroxy (B3LYP/6-311G(2d,d,p) (5 d-orbitals) geometry)
#################################################################################

C4H7OO.1-6Hshift.a
------------------
IRC pathway available
E(UB+HF-LYP/CBSB7) (Hartree): -306.97579339 
Electronic state : 2-A
Cartesian coordinates (Angs):
     O       0.881176     -1.209344      -0.605106
     H      -0.303311     -1.342800      -0.333406
     C      -1.406584     -0.950860       0.307447
     O       1.323759     -0.370133       0.423020
     C      -1.487016      0.449388      -0.096182
     C       0.999828      0.992504       0.129609
     C      -0.440504      1.297198      -0.154098
     H      -0.966689     -1.157846       1.283391
     H      -2.273215     -1.566960       0.082978
     H      -2.443384      0.812660      -0.463925
     H       1.354737      1.530043       1.016642
     H       1.605639      1.325993      -0.724904
     H      -0.607595      2.305339      -0.524748
Rotational constants (GHz):    5.0539300    3.6853200    2.4219200
Vibrational harmonic frequencies (cm-1):
    i1887.9664                  153.2572                  274.6298            
      344.9038                  414.1296                  448.3574            
      607.5414                  613.4079                  693.8377            
      792.6360                  847.2626                  926.5717            
      952.4382                  992.1606                 1003.5092            
     1020.6674                 1050.4081                 1135.5948            
     1202.6534                 1255.5790                 1271.5950            
     1371.9371                 1418.5871                 1444.6344            
     1464.8768                 1572.4497                 1631.9485            
     2990.4115                 3047.9379                 3080.6658            
     3129.0934                 3151.4323                 3172.1214            
Zero-point correction (Hartree): 0.099048

limit.F
-------
E(CBS-QB3) excl. ZPE (Hartree): -306.53310600 
E(CBS-QB3) inc. ZPE scaled by 0.99 (Hartree): -306.43101500 
E(CCSD(T)/6-31+(d')) (Hartree): -306.06762681 
E(CCSD/6-31+(d')) (Hartree): -306.03662642 
E(MP2/6-31+(d')) (Hartree): -305.97464512 
E(MP2/CBSB3) (Hartree): -306.30805454 
E(MP2/CBSB4) (Hartree): -306.03674461 
E(MP3/6-31+(d')) (Hartree): -306.01341536 
E(MP3/CBSB4) (Hartree): -306.07916418 
E(PMP2/6-31+(d')) (Hartree): -305.98869821 
E(PMP2/CBSB3) (Hartree): -306.32213360 
E(PMP2/CBSB4) (Hartree): -306.05071004 
E(PMP3/6-31+(d')) (Hartree): -306.02374173 
E(PMP3/CBSB4) (Hartree): -306.08941489 
E(PUHF/6-31+(d')) (Hartree): -305.12486878 
E(PUHF/CBSB3) (Hartree): -305.23406700 
E(PUHF/CBSB4) (Hartree): -305.14226997 
E(UB+HF-LYP/CBSB7) (Hartree): -307.00717737 
E(UHF/6-31+(d')) (Hartree): -305.10818777 
E(UHF/CBSB3) (Hartree): -305.21734316 
E(UHF/CBSB4) (Hartree): -305.12569185 
Cartesian coordinates (Angs):
     O       1.600740     -0.813394      -0.727709
     H       0.792462     -1.282080      -0.986795
     C      -1.712219     -0.975781       0.387455
     O       1.234692     -0.335829       0.591023
     C      -1.613769      0.205566      -0.323270
     C       0.725904      0.990379       0.448406
     C      -0.553962      1.108703      -0.326621
     H      -0.923448     -1.312845       1.046806
     H      -2.603633     -1.585874       0.311500
     H      -2.457716      0.468976      -0.957440
     H       0.590094      1.301307       1.493947
     H       1.496632      1.629335       0.004577
     H      -0.653566      2.001773      -0.934916
Rotational constants (GHz):    5.4836400    2.7115000    2.2508700
Vibrational harmonic frequencies (cm-1):
       33.1348                  141.4285                  234.0263            
      299.6526                  316.3123                  355.5728            
      466.4076                  546.1366                  664.1624            
      746.9093                  839.7830                  856.9435            
      878.6890                  975.6491                 1001.4386            
     1037.2142                 1064.0288                 1180.5580            
     1244.1989                 1276.1770                 1379.0929            
     1388.0003                 1431.7758                 1452.7403            
     1472.0156                 1521.1647                 2998.3433            
     3048.2544                 3126.5036                 3150.2524            
     3165.9307                 3248.2427                 3724.6525            
Zero-point correction (Hartree): 0.103122

limit.R
-------
E(CBS-QB3) excl. ZPE (Hartree): -306.53487200 
E(CBS-QB3) inc. ZPE scaled by 0.99 (Hartree): -306.43140900 
E(CCSD(T)/6-31+(d')) (Hartree): -306.08163750 
E(CCSD/6-31+(d')) (Hartree): -306.04999392 
E(MP2/6-31+(d')) (Hartree): -305.98918033 
E(MP2/CBSB3) (Hartree): -306.31254312 
E(MP2/CBSB4) (Hartree): -306.04348318 
E(MP3/6-31+(d')) (Hartree): -306.02757079 
E(MP3/CBSB4) (Hartree): -306.08624503 
E(PMP2/6-31+(d')) (Hartree): -305.99206249 
E(PMP2/CBSB3) (Hartree): -306.31576896 
E(PMP2/CBSB4) (Hartree): -306.04636255 
E(PMP3/6-31+(d')) (Hartree): -306.02941244 
E(PMP3/CBSB4) (Hartree): -306.08808393 
E(PUHF/6-31+(d')) (Hartree): -305.12570391 
E(PUHF/CBSB3) (Hartree): -305.22862982 
E(PUHF/CBSB4) (Hartree): -305.13554934 
E(UB+HF-LYP/CBSB7) (Hartree): -307.01515551 
E(UHF/6-31+(d')) (Hartree): -305.12125754 
E(UHF/CBSB3) (Hartree): -305.22353620 
E(UHF/CBSB4) (Hartree): -305.13110231 
Cartesian coordinates (Angs):
     O       2.571511      0.341058      -0.132623
     H      -3.068244     -0.526285      -1.131688
     C      -2.569148     -0.494054      -0.157636
     O       1.647169     -0.555017      -0.406842
     C      -1.648282      0.688047      -0.084251
     C       0.515671     -0.467067       0.532711
     C      -0.346103      0.707862       0.205593
     H      -2.063443     -1.448582      -0.007402
     H      -3.360337     -0.411630       0.595722
     H      -2.120498      1.647020      -0.287542
     H       0.011965     -1.425887       0.420787
     H       0.958855     -0.389809       1.527978
     H       0.179439      1.658117       0.219370
Rotational constants (GHz):   11.0484600    1.6475400    1.5332400
Vibrational harmonic frequencies (cm-1):
       53.1288                   83.2701                  143.5770            
      248.4899                  270.6636                  425.1837            
      537.9041                  579.8336                  736.8581            
      854.3002                  903.5258                  990.5163            
     1016.9719                 1028.1591                 1067.7071            
     1144.5951                 1168.2217                 1272.5590            
     1290.1262                 1348.8741                 1412.3081            
     1434.6041                 1471.7585                 1482.8036            
     1494.0631                 1727.8363                 3021.6960            
     3063.0822                 3063.6108                 3107.5474            
     3130.5229                 3136.6787                 3162.6865            
Zero-point correction (Hartree): 0.104508

#################################################################################
E-2-butene-1-peroxy (B3LYP/6-31G(d,p) (5 d-orbitals) geometry)
#################################################################################

C4H7OO.1-6Hshift.bE
-------------------
E(UB+HF-LYP/6-31G(d,p)) (Hartree): -306.85508770 
Electronic state : 2-A
Cartesian coordinates (Angs):
     O      -0.411563      1.433133       0.363506
     H       0.865764      1.108715       0.096740
     C       1.903592      0.273451       0.001763
     O      -1.168072      0.635047      -0.472951
     C       1.002737     -0.748963      -0.425587
     C      -1.327021     -0.766651       0.036943
     C       0.031701     -1.188348       0.453570
     H       2.229361      0.254896       1.043566
     H       2.646545      0.657171      -0.696374
     H       0.770718     -0.778280      -1.491770
     H      -2.059287     -0.768574       0.849409
     H      -1.738223     -1.269244      -0.844680
     H       0.256148     -1.167056       1.518538
Rotational constants (GHz):    5.3770200    3.5923500    2.5425800
Vibrational harmonic frequencies (cm-1):
    i1943.7571                  223.9075                  278.4000            
      370.3795                  391.2657                  473.1230            
      477.5646                  586.7559                  677.8936            
      745.1137                  819.6207                  927.6745            
      960.8861                  982.1366                  998.5704            
     1064.2974                 1130.2356                 1199.1875            
     1228.2840                 1292.3587                 1333.2966            
     1339.6684                 1353.8194                 1476.2503            
     1491.9829                 1505.0927                 1556.1849            
     3067.4980                 3107.2615                 3126.8022            
     3135.0024                 3162.8924                 3196.5174            
Zero-point correction (Hartree): 0.099510

C4H7OO.mcE
----------
E(UB+HF-LYP/6-31G(d,p)) (Hartree): -306.93238157 
Electronic state : 2-A
Cartesian coordinates (Angs):
     O      -1.889032     -1.074719      -0.385202
     O      -1.643699     -0.147073       0.529357
     C      -0.996390      1.012523      -0.059123
     C       0.494904      0.858579      -0.150722
     C       1.181911     -0.255411       0.106128
     C       2.673782     -0.380148       0.002494
     H      -1.456658      1.179525      -1.039180
     H      -1.270343      1.840091       0.606518
     H       1.017643      1.764585      -0.459496
     H       0.640404     -1.148489       0.411632
     H       3.140593      0.557984      -0.312363
     H       3.112028     -0.673334       0.964705
     H       2.952945     -1.159285      -0.717720
Rotational constants (GHz):    7.8576900    1.9324000    1.6594900
Vibrational harmonic frequencies (cm-1):
       81.0546                  102.4809                  198.5785            
      208.5823                  243.1915                  353.9788            
      484.0332                  650.8946                  741.9505            
      848.3732                  943.2754                 1002.8943            
     1043.3108                 1060.8915                 1073.6746            
     1129.2220                 1173.3865                 1283.0698            
     1314.1021                 1341.2930                 1384.7690            
     1428.3671                 1476.7444                 1492.1774            
     1504.7689                 1759.4332                 3032.9084            
     3048.8834                 3084.3378                 3099.8890            
     3119.9223                 3147.1560                 3179.0735            
Zero-point correction (Hartree): 0.104879

C4H7OO.mmE
----------
E(CBS-QB3) excl. ZPE (Hartree): -306.53739300 
E(CBS-QB3) inc. ZPE scaled by 0.99 (Hartree): -306.43412100 
E(CCSD(T)/6-31+(d')) (Hartree): -306.08454448 
E(CCSD/6-31+(d')) (Hartree): -306.05290832 
E(MP2/6-31+(d')) (Hartree): -305.99221787 
E(MP2/CBSB3) (Hartree): -306.31519344 
E(MP2/CBSB4) (Hartree): -306.04641803 
E(MP3/6-31+(d')) (Hartree): -306.03054329 
E(MP3/CBSB4) (Hartree): -306.08914798 
E(PMP2/6-31+(d')) (Hartree): -305.99511650 
E(PMP2/CBSB3) (Hartree): -306.31843905 
E(PMP2/CBSB4) (Hartree): -306.04931510 
E(PMP3/6-31+(d')) (Hartree): -306.03239718 
E(PMP3/CBSB4) (Hartree): -306.09100015 
E(PUHF/6-31+(d')) (Hartree): -305.12897241 
E(PUHF/CBSB3) (Hartree): -305.23198376 
E(PUHF/CBSB4) (Hartree): -305.13880482 
E(UB+HF-LYP/CBSB7) (Hartree): -307.01785669 
E(UHF/6-31+(d')) (Hartree): -305.12451262 
E(UHF/CBSB3) (Hartree): -305.22687366 
E(UHF/CBSB4) (Hartree): -305.13434378 
E(UB+HF-LYP/6-31G(d,p)) (Hartree): -306.93426233 
Electronic state : 2-A
Cartesian coordinates (Angs):
     O       2.430855     -0.834035       0.059115
     O       1.856245      0.198485      -0.533259
     C       0.814767      0.780066       0.328716
     C      -0.420418     -0.059510       0.317311
     C      -1.611561      0.378033      -0.099687
     C      -2.876043     -0.428547      -0.102287
     H       1.261130      0.862284       1.324297
     H       0.643145      1.775172      -0.090652
     H      -0.299815     -1.077684       0.684060
     H      -1.694450      1.402978      -0.465453
     H      -2.708409     -1.443657       0.268471
     H      -3.645395      0.042047       0.522598
     H      -3.293475     -0.496988      -1.114489
Rotational constants (GHz):   11.5612900    1.4983200    1.4106400
Vibrational harmonic frequencies (cm-1):
       71.7376                   94.7912                  174.3325            
      212.7315                  272.7918                  361.0896            
      495.2682                  550.6052                  791.2884            
      856.6351                  920.3342                  996.8157            
     1013.1344                 1072.7518                 1094.4569            
     1158.7933                 1183.6054                 1271.8501            
     1312.2998                 1340.0709                 1376.9286            
     1426.1379                 1481.4809                 1491.7802            
     1501.4921                 1752.0418                 3034.5715            
     3070.8595                 3086.0066                 3123.2637            
     3135.1844                 3141.8597                 3172.0600            
Zero-point correction (Hartree): 0.104885

C4H7OO.mpE
----------
E(UB+HF-LYP/6-31G(d,p)) (Hartree): -306.93376540 
Electronic state : 2-A
Cartesian coordinates (Angs):
     O      -1.944576      1.151447       0.049225
     O      -1.972020     -0.110734      -0.338914
     C      -0.900603     -0.887199       0.314090
     C       0.435677     -0.588686      -0.279403
     C       1.412239      0.030777       0.389677
     C       2.767791      0.356145      -0.161365
     H      -0.942725     -0.654822       1.380751
     H      -1.215534     -1.921619       0.142127
     H       0.587434     -0.891825      -1.314688
     H       1.226488      0.330653       1.421848
     H       2.874493      0.025273      -1.198390
     H       2.952505      1.436925      -0.125483
     H       3.559479     -0.116509       0.433364
Rotational constants (GHz):    8.8722700    1.6990900    1.5433400
Vibrational harmonic frequencies (cm-1):
       62.1754                   94.2442                  180.5089            
      210.0010                  274.7463                  379.8410            
      483.7227                  548.4861                  776.2651            
      868.3031                  916.4868                 1001.5933            
     1005.8838                 1072.1983                 1093.8052            
     1155.9778                 1176.8430                 1265.7718            
     1325.2727                 1347.0939                 1374.1247            
     1426.5031                 1485.3740                 1491.8371            
     1501.6340                 1750.5753                 3034.6670            
     3071.0127                 3086.3801                 3123.5874            
     3136.8975                 3148.3913                 3164.1352            
Zero-point correction (Hartree): 0.104874

C4H7OO.pcE
----------
E(UB+HF-LYP/6-31G(d,p)) (Hartree): -306.93238160 
Electronic state : 2-A
Cartesian coordinates (Angs):
     O       1.889532     -1.074630      -0.384855
     O       1.643520     -0.146922       0.529444
     C       0.996246      1.012500      -0.059452
     C      -0.495096      0.858722      -0.150415
     C      -1.181905     -0.255565       0.105597
     C      -2.673817     -0.380297       0.002601
     H       1.270577      1.840406       0.605613
     H       1.456271      1.178792      -1.039749
     H      -1.017999      1.765071      -0.457893
     H      -0.640168     -1.148903       0.409941
     H      -3.140908      0.558275      -0.310524
     H      -2.953272     -1.158337      -0.718678
     H      -3.111485     -0.675042       0.964596
Rotational constants (GHz):    7.8581800    1.9322900    1.6593600
Vibrational harmonic frequencies (cm-1):
       80.9629                  102.4836                  198.5271            
      208.5687                  243.2000                  354.0223            
      484.1189                  650.7629                  742.0072            
      848.3299                  943.2726                 1002.9093            
     1043.4077                 1060.8538                 1073.6779            
     1129.2304                 1173.4368                 1283.0856            
     1314.1114                 1341.3151                 1384.7667            
     1428.3614                 1476.7503                 1492.1862            
     1504.7640                 1759.4838                 3032.9316            
     3048.8677                 3084.3762                 3099.8692            
     3119.9340                 3147.1813                 3179.0369            
Zero-point correction (Hartree): 0.104880

C4H7OO.pmE
----------
E(UB+HF-LYP/6-31G(d,p)) (Hartree): -306.93376539 
Electronic state : 2-A
Cartesian coordinates (Angs):
     O       1.943075      1.152079       0.048824
     O       1.971798     -0.110137      -0.338979
     C       0.900978     -0.887676       0.314279
     C      -0.435640     -0.589999      -0.278883
     C      -1.411549      0.031218       0.389562
     C      -2.767282      0.356127      -0.161396
     H       1.216727     -1.921805       0.142110
     H       0.943319     -0.655247       1.380908
     H      -0.588125     -0.895032      -1.313504
     H      -1.225010      0.333128       1.420993
     H      -2.874319      0.023982      -1.197971
     H      -3.558877     -0.115585       0.434185
     H      -2.951737      1.437000      -0.126852
Rotational constants (GHz):    8.8644500    1.7000800    1.5438400
Vibrational harmonic frequencies (cm-1):
       62.2648                   94.3145                  180.5069            
      210.0281                  274.8232                  379.7447            
      483.6595                  548.5700                  776.1856            
      867.7900                  916.3076                 1001.5585            
     1005.8556                 1072.1825                 1093.7341            
     1155.9627                 1176.8515                 1265.6849            
     1325.3145                 1347.1050                 1373.9914            
     1426.4665                 1485.4191                 1491.8263            
     1501.6196                 1750.4648                 3034.7039            
     3071.1188                 3086.4180                 3123.6545            
     3137.0299                 3148.4591                 3164.1421            
Zero-point correction (Hartree): 0.104873

C4H7OO.ppE
----------
E(UB+HF-LYP/6-31G(d,p)) (Hartree): -306.93426232 
Electronic state : 2-A
Cartesian coordinates (Angs):
     O      -2.430831     -0.833937       0.059074
     O      -1.856097      0.198469      -0.533357
     C      -0.814774      0.779989       0.328783
     C       0.420403     -0.059560       0.317463
     C       1.611468      0.377986      -0.099675
     C       2.875985     -0.428473      -0.102327
     H      -0.643148      1.775104      -0.090559
     H      -1.261216      0.862109       1.324329
     H       0.299841     -1.077693       0.684348
     H       1.694264      1.402890      -0.465589
     H       2.708560     -1.443530       0.268684
     H       3.293187     -0.497165      -1.114627
     H       3.645446      0.042376       0.522212
Rotational constants (GHz):   11.5618800    1.4983900    1.4107400
Vibrational harmonic frequencies (cm-1):
       71.6831                   94.7448                  174.3367            
      212.7352                  272.7761                  361.1389            
      495.2847                  550.6310                  791.3274            
      856.7564                  920.3743                  996.8376            
     1013.1517                 1072.7684                 1094.5247            
     1158.8434                 1183.6398                 1271.8882            
     1312.3158                 1340.1091                 1376.9555            
     1426.1639                 1481.4729                 1491.7877            
     1501.4950                 1752.1576                 3034.5487            
     3070.8928                 3085.9679                 3123.2213            
     3135.2202                 3141.8211                 3172.0234            
Zero-point correction (Hartree): 0.104886

C4H7OO.tcE
----------
E(UB+HF-LYP/6-31G(d,p)) (Hartree): -306.93188998 
Electronic state : 2-A
Cartesian coordinates (Angs):
     O      -2.739654     -0.473658       0.000117
     O      -1.418848     -0.505789      -0.000379
     C      -0.869089      0.842210       0.000132
     C       0.627426      0.782551      -0.000053
     C       1.370624     -0.325969       0.000270
     C       2.871334     -0.342967      -0.000051
     H      -1.262161      1.355726      -0.885949
     H      -1.261991      1.354948       0.886736
     H       1.109323      1.760520      -0.000533
     H       0.873545     -1.293885       0.000508
     H       3.289260      0.668307      -0.000064
     H       3.259302     -0.872587       0.879025
     H       3.258970     -0.872403      -0.879413
Rotational constants (GHz):   12.7299300    1.5438700    1.4008700
Vibrational harmonic frequencies (cm-1):
       41.1638                   92.7873                  153.1661            
      202.8776                  248.0102                  348.7612            
      420.2132                  647.5219                  733.5426            
      888.1403                  969.5126                 1006.6545            
     1013.2549                 1072.7922                 1074.4353            
     1136.9026                 1209.8272                 1224.1260            
     1325.4424                 1344.4890                 1392.3269            
     1427.5049                 1491.7123                 1494.1581            
     1504.3845                 1761.4766                 3032.5434            
     3041.1646                 3081.8742                 3084.1015            
     3118.9585                 3150.8569                 3182.2000            
Zero-point correction (Hartree): 0.104606

C4H7OO.tmE
----------
E(UB+HF-LYP/6-31G(d,p)) (Hartree): -306.93377699 
Electronic state : 2-A
Cartesian coordinates (Angs):
     O       2.951963     -0.084930      -0.143406
     O       1.695331     -0.476153      -0.257373
     C       0.778238      0.536405       0.294519
     C      -0.571395     -0.081881       0.441957
     C      -1.647338      0.325260      -0.237884
     C      -3.025685     -0.248358      -0.102440
     H       1.214526      0.849923       1.247860
     H       0.774254      1.384713      -0.396877
     H      -0.653418     -0.902215       1.153943
     H      -1.534945      1.145134      -0.949232
     H      -3.054123     -1.067695       0.621321
     H      -3.741536      0.518578       0.218701
     H      -3.386021     -0.628331      -1.066400
Rotational constants (GHz):   18.7528200    1.3009100    1.2826300
Vibrational harmonic frequencies (cm-1):
       46.2402                   82.0093                  158.6775            
      210.4536                  279.7093                  381.5684            
      391.6979                  571.3255                  777.4338            
      880.5236                  950.8520                  989.5917            
     1008.3533                 1073.5923                 1103.4487            
     1155.8208                 1194.7768                 1226.2376            
     1320.1055                 1341.2818                 1381.0375            
     1426.2212                 1491.2660                 1495.7569            
     1502.0458                 1752.8500                 3035.2740            
     3064.6191                 3086.8813                 3121.1929            
     3124.6081                 3143.6316                 3164.8880            
Zero-point correction (Hartree): 0.104645

C4H7OO.tpE
----------
E(UB+HF-LYP/6-31G(d,p)) (Hartree): -306.93377699 
Electronic state : 2-A
Cartesian coordinates (Angs):
     O      -2.951811     -0.084102      -0.145070
     O      -1.695380     -0.476831      -0.256052
     C      -0.778268      0.535968       0.295380
     C       0.571559     -0.082033       0.442307
     C       1.647123      0.325268      -0.238022
     C       3.025661     -0.248022      -0.103056
     H      -0.774814      1.384244      -0.396042
     H      -1.214192      0.849449       1.248910
     H       0.654097     -0.902233       1.154388
     H       1.534247      1.145016      -0.949437
     H       3.054528     -1.067327       0.620724
     H       3.385802     -0.627867      -1.067123
     H       3.741413      0.519099       0.217905
Rotational constants (GHz):   18.7455800    1.3009300    1.2827000
Vibrational harmonic frequencies (cm-1):
       46.4498                   82.0580                  158.5860            
      210.4274                  279.7300                  381.4522            
      391.6751                  571.3564                  777.4092            
      880.5590                  950.8944                  989.4591            
     1008.3558                 1073.5922                 1103.4382            
     1155.8768                 1194.7887                 1226.1424            
     1320.1462                 1341.2933                 1381.0633            
     1426.2130                 1491.2611                 1495.7522            
     1502.0452                 1752.8780                 3035.2812            
     3064.6308                 3086.9005                 3121.1927            
     3124.6182                 3143.6423                 3164.8815            
Zero-point correction (Hartree): 0.104645

#################################################################################
Z-2-butene-2-peroxy (B3LYP/6-31G(d,p) (5 d-orbitals) geometry)
#################################################################################

C3H5OO.1-5Hshift.Z
------------------
E(CBS-QB3) excl. ZPE (Hartree): -306.50350600 
E(CBS-QB3) inc. ZPE scaled by 0.99 (Hartree): -306.40633600 
E(CCSD(T)/6-31+(d')) (Hartree): -306.03440884 
E(CCSD/6-31+(d')) (Hartree): -305.99713249 
E(MP2/6-31+(d')) (Hartree): -305.94282281 
E(MP2/CBSB3) (Hartree): -306.27770581 
E(MP2/CBSB4) (Hartree): -306.00478397 
E(MP3/6-31+(d')) (Hartree): -305.97268279 
E(MP3/CBSB4) (Hartree): -306.03830998 
E(PMP2/6-31+(d')) (Hartree): -305.95407231 
E(PMP2/CBSB3) (Hartree): -306.28876732 
E(PMP2/CBSB4) (Hartree): -306.01550989 
E(PMP3/6-31+(d')) (Hartree): -305.98043984 
E(PMP3/CBSB4) (Hartree): -306.04568164 
E(PUHF/6-31+(d')) (Hartree): -305.05564929 
E(PUHF/CBSB3) (Hartree): -305.16429061 
E(PUHF/CBSB4) (Hartree): -305.07059891 
E(UB+HF-LYP/CBSB7) (Hartree): -306.98331404 
E(UHF/6-31+(d')) (Hartree): -305.04193036 
E(UHF/CBSB3) (Hartree): -305.15076410 
E(UHF/CBSB4) (Hartree): -305.05749412 
E(UB+HF-LYP/6-31G(d,p)) (Hartree): -306.90113264 
Electronic state : 2-A
Cartesian coordinates (Angs):
     C       1.698525     -0.970547       0.005126
     C       0.257545     -1.173317      -0.005863
     C      -0.639979     -0.147913       0.032637
     O      -0.281662      1.150872      -0.098408
     O       1.098225      1.423323       0.037340
     H       2.168434     -0.740406       0.965200
     H       2.281312     -1.687887      -0.573135
     H      -0.155341     -2.160096      -0.209535
     C      -2.132969     -0.280157       0.040223
     H       1.623051      0.353207      -0.265918
     H      -2.547917      0.102617       0.979212
     H      -2.422752     -1.327311      -0.064207
     H      -2.578025      0.297922      -0.775818
Rotational constants (GHz):    5.2905100    3.3571900    2.1081700
Vibrational harmonic frequencies (cm-1):
    i1698.1115                  124.3387                  181.7079            
      231.3425                  344.4949                  459.8107            
      502.4676                  560.9785                  581.7586            
      669.9198                  783.8631                  875.9448            
      937.2130                 1017.6449                 1038.9829            
     1058.7388                 1070.9830                 1173.9443            
     1221.7367                 1287.0619                 1359.3720            
     1425.3429                 1482.5599                 1492.0830            
     1500.0151                 1588.5979                 1651.2704            
     3054.0319                 3084.1498                 3114.1415            
     3152.3954                 3157.7888                 3167.5825            
Zero-point correction (Hartree): 0.098764

C3H5OO.cZ
---------
E(UB+HF-LYP/6-31G(d,p)) (Hartree): -306.93916131 
Electronic state : 2-A
Cartesian coordinates (Angs):
     O      -0.663217      1.712077       0.151500
     O       0.496175      1.145763      -0.178162
     C       0.580570     -0.239674      -0.007048
     C      -0.464931     -1.079273       0.047708
     C      -1.933723     -0.789495      -0.054328
     C       2.029546     -0.627666       0.034177
     H      -0.187051     -2.123380       0.172883
     H      -2.139429      0.076500      -0.686047
     H      -2.459048     -1.662749      -0.453426
     H      -2.363591     -0.566003       0.929874
     H       2.132648     -1.713287       0.079621
     H       2.553683     -0.266789      -0.857739
     H       2.530350     -0.190363       0.905080
Rotational constants (GHz):    4.6321000    3.3687800    2.0141700
Vibrational harmonic frequencies (cm-1):
       72.7003                  148.7172                  155.4942            
      235.4682                  277.9453                  339.0371            
      410.1581                  531.6336                  624.5118            
      807.3562                  819.8715                  946.5465            
     1052.7340                 1055.4526                 1075.2581            
     1113.1701                 1171.6961                 1200.2040            
     1348.4950                 1426.6961                 1431.7212            
     1484.3761                 1486.0309                 1494.6302            
     1506.0859                 1712.6082                 3044.3871            
     3049.7976                 3100.3236                 3105.9491            
     3144.2631                 3152.8295                 3177.8392            
Zero-point correction (Hartree): 0.104121

C3H5OO.tZ
---------
E(CBS-QB3) excl. ZPE (Hartree): -306.54636800 
E(CBS-QB3) inc. ZPE scaled by 0.99 (Hartree): -306.44375300 
E(CCSD(T)/6-31+(d')) (Hartree): -306.09052208 
E(CCSD/6-31+(d')) (Hartree): -306.05796251 
E(MP2/6-31+(d')) (Hartree): -305.99478052 
E(MP2/CBSB3) (Hartree): -306.31976599 
E(MP2/CBSB4) (Hartree): -306.04934745 
E(MP3/6-31+(d')) (Hartree): -306.03278133 
E(MP3/CBSB4) (Hartree): -306.09170226 
E(PMP2/6-31+(d')) (Hartree): -306.00226416 
E(PMP2/CBSB3) (Hartree): -306.32743217 
E(PMP2/CBSB4) (Hartree): -306.05679765 
E(PMP3/6-31+(d')) (Hartree): -306.03828787 
E(PMP3/CBSB4) (Hartree): -306.09718090 
E(PUHF/6-31+(d')) (Hartree): -305.13588556 
E(PUHF/CBSB3) (Hartree): -305.23947634 
E(PUHF/CBSB4) (Hartree): -305.14583519 
E(UB+HF-LYP/CBSB7) (Hartree): -307.02752446 
E(UHF/6-31+(d')) (Hartree): -305.12707531 
E(UHF/CBSB3) (Hartree): -305.23036614 
E(UHF/CBSB4) (Hartree): -305.13706075 
E(UB+HF-LYP/6-31G(d,p)) (Hartree): -306.94549496 
Electronic state : 2-A
Cartesian coordinates (Angs):
     O      -1.806258     -1.139755      -0.000261
     O      -0.489905     -0.944155       0.000356
     C      -0.100553      0.393730       0.000095
     C       1.225544      0.619396      -0.000019
     C       2.304042     -0.421719      -0.000104
     C      -1.187429      1.415888      -0.000009
     H       1.536095      1.661080      -0.000015
     H       1.898336     -1.434203      -0.000875
     H       2.950107     -0.307888      -0.879451
     H       2.949359     -0.308951       0.879932
     H      -0.751071      2.416491       0.000120
     H      -1.831423      1.300576      -0.877337
     H      -1.831723      1.300414       0.877084
Rotational constants (GHz):    5.9985000    2.6717200    1.8914800
Vibrational harmonic frequencies (cm-1):
      123.7775                  137.3371                  211.2774            
      222.4830                  240.2016                  336.1954            
      493.0823                  513.3061                  613.8706            
      779.7875                  812.7349                  933.4622            
     1047.6652                 1057.3663                 1068.7528            
     1116.7433                 1172.3685                 1238.1680            
     1332.1088                 1422.9675                 1425.9432            
     1475.4323                 1488.5216                 1498.6448            
     1501.4898                 1722.1265                 3037.5311            
     3060.1025                 3083.4777                 3119.6120            
     3153.8941                 3157.1261                 3189.2361            
Zero-point correction (Hartree): 0.104310

#################################################################################
2-Me-1-butene-1-peroxy (B3LYP/6-31G(d,p) (5 d-orbitals) geometry)
#################################################################################

C3H5OO.1-5Hshift
----------------
E(CBS-QB3) excl. ZPE (Hartree): -306.49919100 
E(CBS-QB3) inc. ZPE scaled by 0.99 (Hartree): -306.40180200 
E(CCSD(T)/6-31+(d')) (Hartree): -306.02916240 
E(CCSD/6-31+(d')) (Hartree): -305.99163739 
E(MP2/6-31+(d')) (Hartree): -305.93489796 
E(MP2/CBSB3) (Hartree): -306.26998541 
E(MP2/CBSB4) (Hartree): -305.99689950 
E(MP3/6-31+(d')) (Hartree): -305.96504259 
E(MP3/CBSB4) (Hartree): -306.03082737 
E(PMP2/6-31+(d')) (Hartree): -305.94828151 
E(PMP2/CBSB3) (Hartree): -306.28332726 
E(PMP2/CBSB4) (Hartree): -306.00986540 
E(PMP3/6-31+(d')) (Hartree): -305.97461252 
E(PMP3/CBSB4) (Hartree): -306.04009672 
E(PUHF/6-31+(d')) (Hartree): -305.05147408 
E(PUHF/CBSB3) (Hartree): -305.16043162 
E(PUHF/CBSB4) (Hartree): -305.06661334 
E(UB+HF-LYP/CBSB7) (Hartree): -306.97863191 
E(UHF/6-31+(d')) (Hartree): -305.03558481 
E(UHF/CBSB3) (Hartree): -305.14459741 
E(UHF/CBSB4) (Hartree): -305.05122861 
E(UB+HF-LYP/6-31G(d,p)) (Hartree): -306.89662777 
Electronic state : 2-A
Cartesian coordinates (Angs):
     C       0.342587      1.421440       0.033210
     C       0.778746      0.031774       0.091240
     C      -0.142022     -0.974295       0.140025
     O      -1.466061     -0.842925      -0.070024
     O      -1.948642      0.483247      -0.059544
     H      -0.037307      1.866282       0.956182
     H       1.007996      2.097995      -0.505112
     C       2.239244     -0.315133      -0.079013
     H       0.112132     -2.029053       0.176797
     H      -0.949425      1.134019      -0.314812
     H       2.839545      0.099207       0.739125
     H       2.624585      0.121105      -1.009143
     H       2.408763     -1.394852      -0.119266
Rotational constants (GHz):    7.1479400    2.6621200    1.9925300
Vibrational harmonic frequencies (cm-1):
    i1707.1657                  123.3025                  171.7321            
      313.1648                  344.0815                  419.6517            
      486.6529                  522.6070                  625.5866            
      709.2466                  845.9713                  900.5738            
      931.2118                  981.2590                 1002.9784            
     1049.0223                 1077.1012                 1190.0793            
     1251.3083                 1287.8825                 1380.2900            
     1422.1453                 1486.6642                 1491.2188            
     1504.5870                 1576.4711                 1651.5071            
     3035.0683                 3087.3378                 3090.7877            
     3125.7041                 3162.2403                 3216.7419            
Zero-point correction (Hartree): 0.099019

C3H5OO.c
--------
E(UB+HF-LYP/6-31G(d,p)) (Hartree): -306.93652427 
Electronic state : 2-A
Cartesian coordinates (Angs):
     O       2.048280      0.488693       0.170437
     O       1.594624     -0.730232      -0.122367
     C       0.227749     -0.921397      -0.037211
     C      -0.761656     -0.010860      -0.019308
     C      -2.179039     -0.517617       0.079110
     H       0.042972     -1.990446      -0.034750
     C      -0.593754      1.483846      -0.088555
     H      -2.233695     -1.607475       0.145464
     H      -2.675207     -0.098505       0.963901
     H      -2.765225     -0.195611      -0.790776
     H       0.305072      1.774016      -0.632194
     H      -1.473407      1.936224      -0.558787
     H      -0.503540      1.910269       0.918370
Rotational constants (GHz):    6.8798100    2.5002100    1.8892400
Vibrational harmonic frequencies (cm-1):
       70.6313                  113.9927                  198.2121            
      272.3999                  286.2592                  361.9449            
      391.6318                  471.9038                  692.6690            
      833.9409                  854.8628                  980.4105            
      990.2461                 1007.2666                 1096.8524            
     1101.3981                 1147.2994                 1248.8876            
     1391.0570                 1421.9192                 1433.5856            
     1481.0917                 1487.5834                 1496.8534            
     1502.1407                 1669.8246                 3030.3044            
     3043.1298                 3081.7638                 3096.8153            
     3128.7330                 3163.1678                 3219.5309            
Zero-point correction (Hartree): 0.104268

C3H5OO.t
--------
E(CBS-QB3) excl. ZPE (Hartree): -306.54342500 
E(CBS-QB3) inc. ZPE scaled by 0.99 (Hartree): -306.44093200 
E(CCSD(T)/6-31+(d')) (Hartree): -306.08852428 
E(CCSD/6-31+(d')) (Hartree): -306.05619709 
E(MP2/6-31+(d')) (Hartree): -305.99414283 
E(MP2/CBSB3) (Hartree): -306.31861740 
E(MP2/CBSB4) (Hartree): -306.04869305 
E(MP3/6-31+(d')) (Hartree): -306.03203174 
E(MP3/CBSB4) (Hartree): -306.09095683 
E(PMP2/6-31+(d')) (Hartree): -305.99997451 
E(PMP2/CBSB3) (Hartree): -306.32467226 
E(PMP2/CBSB4) (Hartree): -306.05448910 
E(PMP3/6-31+(d')) (Hartree): -306.03625635 
E(PMP3/CBSB4) (Hartree): -306.09515263 
E(PUHF/6-31+(d')) (Hartree): -305.13267053 
E(PUHF/CBSB3) (Hartree): -305.23628232 
E(PUHF/CBSB4) (Hartree): -305.14253750 
E(UB+HF-LYP/CBSB7) (Hartree): -307.02482744 
E(UHF/6-31+(d')) (Hartree): -305.12564932 
E(UHF/CBSB3) (Hartree): -305.22888486 
E(UHF/CBSB4) (Hartree): -305.13555339 
E(UB+HF-LYP/6-31G(d,p)) (Hartree): -306.94255391 
Electronic state : 2-A
Cartesian coordinates (Angs):
     O       2.627995     -0.265606      -0.000219
     O       1.452894      0.360790       0.000340
     C       0.380276     -0.512671       0.000049
     C      -0.876780     -0.044661      -0.000152
     C      -2.030806     -1.010264       0.000022
     H       0.678190     -1.554964      -0.000202
     C      -1.201966      1.424572      -0.000109
     H      -1.698952     -2.051885      -0.001022
     H      -2.666536     -0.855037       0.881036
     H      -2.668098     -0.853602      -0.879557
     H      -0.306827      2.047734      -0.001060
     H      -1.805538      1.681996      -0.879516
     H      -1.803689      1.682429       0.880490
Rotational constants (GHz):    7.8728800    2.0351600    1.6501000
Vibrational harmonic frequencies (cm-1):
      111.1430                  136.4532                  185.9951            
      199.7702                  283.7014                  339.3226            
      449.9300                  480.1510                  543.8795            
      857.8423                  858.8334                  974.2227            
     1006.7302                 1048.8790                 1102.7198            
     1106.3967                 1174.4018                 1258.4294            
     1344.2974                 1421.9869                 1433.2900            
     1483.2979                 1492.9149                 1501.8269            
     1503.6567                 1710.0665                 3029.7963            
     3037.1010                 3080.6586                 3084.7272            
     3129.7583                 3158.7886                 3232.7547            
Zero-point correction (Hartree): 0.104257

******************************************
1-pentylperoxy M05-2X/6-311G(d,p) geometry
******************************************

C5H11OO.pmmm
-------------------
E(UM052X/6-311G(d,p)) (Hartree): -347.50427915 
Electronic state : 2-A
Cartesian coordinates (Angs):
     O       1.830936     -1.275784      -0.067401
     O       2.106854     -0.006584      -0.066049
     C       1.049733      0.778693      -0.673182
     C       0.063380      1.233077       0.386595
     C      -0.677442      0.093451       1.090577
     C      -1.481680     -0.820931       0.162373
     C      -2.492750     -0.069828      -0.701751
     H       1.563263      1.623783      -1.126718
     H       0.596958      0.156506      -1.441965
     H       0.606038      1.825487       1.125394
     H      -0.647066      1.908008      -0.096102
     H       0.040424     -0.507929       1.650564
     H      -1.353930      0.539447       1.824208
     H      -0.799258     -1.394249      -0.466190
     H      -2.009223     -1.548822       0.781198
     H      -2.001784      0.569863      -1.436469
     H      -3.134534      0.563651      -0.085642
     H      -3.130654     -0.763572      -1.248348
Rotational constants (GHz):    4.2620000    1.5766400    1.4320200
Vibrational harmonic frequencies (cm-1):
       82.5292                   96.9358                  121.0770            
      196.7436                  228.9299                  298.0410            
      356.7559                  420.3082                  501.5198            
      557.0092                  738.2106                  802.3434            
      850.4199                  893.9704                  930.4003            
      988.5107                 1037.0169                 1046.4190            
     1107.0732                 1152.8081                 1162.6778            
     1243.2143                 1246.6893                 1293.8442            
     1329.4475                 1346.7903                 1382.8003            
     1399.6713                 1415.2098                 1426.2356            
     1435.0627                 1494.1833                 1505.2363            
     1517.3035                 1523.0278                 1531.2431            
     1540.7351                 3068.4585                 3069.6047            
     3076.1183                 3080.4192                 3105.6841            
     3110.4928                 3118.3181                 3123.0043            
     3136.8405                 3142.8944                 3175.1997            
Zero-point correction (Hartree): 0.160400

C5H11OO.pmmp
-------------------
E(UM052X/6-311G(d,p)) (Hartree): -347.50124361 
Electronic state : 2-A
Cartesian coordinates (Angs):
     O      -1.765272     -1.217498      -0.612235
     O      -2.058725     -0.051459      -0.120099
     C      -1.105634      0.368726       0.890012
     C      -0.095059      1.323413       0.273534
     C       0.778297      0.721895      -0.835197
     C       2.071095      0.062055      -0.349719
     C       1.864536     -1.118611       0.598277
     H      -1.706121      0.869001       1.647543
     H      -0.664980     -0.538070       1.290358
     H      -0.656284      2.172561      -0.119695
     H       0.535119      1.709942       1.080241
     H       0.193675     -0.000335      -1.408426
     H       1.045105      1.520545      -1.528979
     H       2.625327     -0.279487      -1.226006
     H       2.696061      0.815628       0.137480
     H       1.139199     -1.822464       0.186735
     H       1.504016     -0.790841       1.574146
     H       2.801456     -1.649697       0.763830
Rotational constants (GHz):    3.8490500    1.6384900    1.4463600
Vibrational harmonic frequencies (cm-1):
       58.7633                  107.6880                  126.3748            
      179.4887                  269.7932                  287.8739            
      325.5456                  424.3404                  464.3427            
      541.3135                  773.2378                  800.4276            
      838.1913                  879.2611                  927.6098            
      982.8105                 1041.2589                 1054.8120            
     1122.9296                 1142.5177                 1158.9150            
     1242.0546                 1255.2811                 1307.4451            
     1326.9783                 1342.7265                 1384.4932            
     1402.7646                 1416.0304                 1421.4629            
     1439.4483                 1490.0527                 1505.6666            
     1509.2849                 1515.6226                 1530.5347            
     1544.8082                 3055.1487                 3058.5618            
     3072.0344                 3076.1388                 3096.2384            
     3104.7252                 3112.5092                 3120.0625            
     3140.9731                 3150.0513                 3206.1030            
Zero-point correction (Hartree): 0.160234

C5H11OO.pmmt
-------------------
E(UM052X/6-311G(d,p)) (Hartree): -347.50471826 
Electronic state : 2-A
Cartesian coordinates (Angs):
     O      -1.354379     -1.592379      -0.113781
     O      -2.049668     -0.503100      -0.249084
     C      -1.543526      0.565715       0.589532
     C      -0.530478      1.397401      -0.176507
     C       0.707402      0.624206      -0.632055
     C       1.537198      0.044459       0.511332
     C       2.841367     -0.566126       0.004879
     H      -2.423326      1.150947       0.848453
     H      -1.127726      0.097560       1.478215
     H      -1.031363      1.838350      -1.040064
     H      -0.230601      2.222064       0.476447
     H       0.408519     -0.183032      -1.304281
     H       1.333592      1.302012      -1.217742
     H       1.755023      0.832637       1.238394
     H       0.959634     -0.723157       1.027571
     H       3.456051      0.186620      -0.491270
     H       2.636918     -1.359284      -0.715649
     H       3.423872     -0.994810       0.819760
Rotational constants (GHz):    4.1902000    1.5330600    1.2635000
Vibrational harmonic frequencies (cm-1):
       64.7118                   97.6349                  129.6992            
      179.3714                  222.3324                  253.0611            
      296.3868                  407.6457                  490.1785            
      556.5357                  738.6754                  804.6032            
      856.9698                  891.9699                  936.7079            
      986.2198                 1039.4037                 1063.8873            
     1105.8923                 1148.4915                 1169.2097            
     1244.0664                 1261.9027                 1305.4324            
     1334.3017                 1339.4385                 1355.8807            
     1407.6652                 1416.3637                 1428.2309            
     1431.0613                 1490.7456                 1507.1527            
     1511.7406                 1515.5195                 1520.4811            
     1527.1321                 3055.3770                 3066.0646            
     3066.8989                 3069.3460                 3099.5968            
     3110.4281                 3117.7837                 3128.5216            
     3138.4020                 3140.1943                 3188.2285            
Zero-point correction (Hartree): 0.159967

C5H11OO.pmpt
-------------------
E(UM052X/6-311G(d,p)) (Hartree): -347.50242609 
Electronic state : 2-A
Cartesian coordinates (Angs):
     O       1.191169     -1.633774      -0.368989
     O       1.623223     -0.759308       0.489391
     C       1.822501      0.542522      -0.117260
     C       0.615868      1.436331       0.102057
     C      -0.690521      0.870390      -0.470910
     C      -1.485192      0.029219       0.529771
     C      -2.755089     -0.539077      -0.095741
     H       2.712668      0.941274       0.365141
     H       2.008422      0.361095      -1.173908
     H       0.500632      1.632376       1.170264
     H       0.856637      2.391192      -0.370660
     H      -1.323805      1.695952      -0.803121
     H      -0.471035      0.266620      -1.355697
     H      -0.866638     -0.784146       0.907430
     H      -1.743489      0.656129       1.387588
     H      -2.509158     -1.196607      -0.930748
     H      -3.394303      0.260396      -0.474642
     H      -3.330464     -1.115925       0.627638
Rotational constants (GHz):    3.8693900    1.6729600    1.3018100
Vibrational harmonic frequencies (cm-1):
       53.6247                   69.2494                  110.5043            
      136.9120                  238.2031                  251.1141            
      294.2321                  387.9340                  483.3514            
      544.9229                  745.0994                  810.4438            
      880.1080                  904.9768                  916.2778            
      992.5235                 1034.5161                 1071.8626            
     1108.9124                 1144.7912                 1184.9211            
     1244.2581                 1272.0805                 1286.2773            
     1337.3440                 1345.7024                 1355.6929            
     1400.2960                 1418.7663                 1422.7443            
     1430.0942                 1496.0428                 1506.2486            
     1511.3178                 1515.4644                 1523.2974            
     1530.0397                 3064.1769                 3067.4998            
     3069.2268                 3075.9220                 3101.6297            
     3105.7786                 3113.4893                 3121.4082            
     3141.7454                 3143.7003                 3175.5415            
Zero-point correction (Hartree): 0.159791

C5H11OO.pmtm
-------------------
E(UM052X/6-311G(d,p)) (Hartree): -347.50361994 
Electronic state : 2-A
Cartesian coordinates (Angs):
     O      -2.285480     -1.177969      -0.021456
     O      -2.112864     -0.046640      -0.636855
     C      -1.523916      0.955103       0.230441
     C      -0.013691      0.940918       0.093247
     C       0.624398     -0.363082       0.567911
     C       2.152969     -0.306349       0.586000
     C       2.766634     -0.080621      -0.795032
     H      -1.951739      1.896824      -0.107171
     H      -1.852636      0.723794       1.241785
     H       0.237507      1.135180      -0.950526
     H       0.377569      1.777810       0.680011
     H       0.256462     -0.594362       1.570427
     H       0.299532     -1.181892      -0.077498
     H       2.477708      0.485752       1.266244
     H       2.530411     -1.244268       0.997016
     H       2.523528      0.906846      -1.186858
     H       2.397390     -0.823592      -1.504427
     H       3.852663     -0.161025      -0.757911
Rotational constants (GHz):    5.3108400    1.2133400    1.1444600
Vibrational harmonic frequencies (cm-1):
       39.5446                   94.8431                  103.6967            
      126.5508                  215.5574                  262.1961            
      294.5174                  399.5310                  497.9414            
      546.4996                  750.9869                  793.1487            
      853.9528                  889.9371                  938.5240            
      980.5124                 1033.6295                 1061.1836            
     1109.8352                 1147.4027                 1176.7739            
     1240.9450                 1256.4706                 1304.4287            
     1326.4597                 1341.7660                 1365.9681            
     1396.5861                 1411.9068                 1430.7003            
     1435.8863                 1490.0967                 1505.9003            
     1510.5145                 1512.9788                 1522.8679            
     1531.0046                 3056.3030                 3061.2771            
     3067.2645                 3074.3053                 3103.8159            
     3109.0081                 3112.0165                 3127.9045            
     3142.7339                 3145.3480                 3176.6586            
Zero-point correction (Hartree): 0.159649

C5H11OO.pmtp
-------------------
E(UM052X/6-311G(d,p)) (Hartree): -347.50363761 
Electronic state : 2-A
Cartesian coordinates (Angs):
     O      -2.462940     -1.023239       0.283374
     O      -2.278858      0.043423      -0.435540
     C      -1.421371      1.004680       0.230097
     C       0.015514      0.827805      -0.222063
     C       0.614452     -0.517698       0.181877
     C       2.035451     -0.723253      -0.344596
     C       3.047452      0.270498       0.222963
     H      -1.818263      1.975646      -0.058903
     H      -1.543114      0.841916       1.299245
     H       0.059502      0.943872      -1.308220
     H       0.590367      1.648751       0.212426
     H       0.613919     -0.599401       1.273110
     H      -0.025267     -1.318586      -0.190180
     H       2.352924     -1.737553      -0.096983
     H       2.026957     -0.657733      -1.435837
     H       3.026031      0.259205       1.314461
     H       2.842894      1.289046      -0.106772
     H       4.059443      0.021163      -0.094687
Rotational constants (GHz):    6.3231100    1.1597100    1.0488500
Vibrational harmonic frequencies (cm-1):
       30.6120                  107.0597                  121.5069            
      138.4196                  204.1032                  270.1261            
      287.9262                  411.2235                  491.7689            
      543.5419                  740.3793                  779.9385            
      852.8780                  900.1873                  932.9413            
      990.4880                 1017.2768                 1066.7752            
     1105.3321                 1137.1861                 1188.8826            
     1245.1490                 1249.0016                 1300.0143            
     1330.4156                 1344.5240                 1365.0474            
     1395.8255                 1414.1077                 1426.5087            
     1437.6765                 1490.9385                 1504.7579            
     1508.0595                 1511.8821                 1523.1297            
     1529.0363                 3058.8063                 3065.1339            
     3070.4013                 3071.5470                 3099.9787            
     3104.5045                 3110.8362                 3124.9829            
     3137.0907                 3144.8266                 3173.3362            
Zero-point correction (Hartree): 0.159599

C5H11OO.pmtt
-------------------
E(UM052X/6-311G(d,p)) (Hartree): -347.50443994 
Electronic state : 2-A
Cartesian coordinates (Angs):
     O       2.023230      1.438603       0.089778
     O       2.254175      0.283052      -0.457787
     C       1.733774     -0.807492       0.342755
     C       0.317987     -1.143586      -0.084197
     C      -0.686861     -0.028268       0.188897
     C      -2.105366     -0.422563      -0.214544
     C      -3.110146      0.692677       0.059525
     H       2.418522     -1.632707       0.158767
     H       1.788814     -0.486516       1.381312
     H       0.322187     -1.391280      -1.148387
     H       0.019726     -2.048212       0.453373
     H      -0.666257      0.228947       1.252059
     H      -0.393338      0.873068      -0.352660
     H      -2.117941     -0.677769      -1.277383
     H      -2.398432     -1.325425       0.327831
     H      -2.841354      1.596172      -0.489422
     H      -3.129595      0.941809       1.121582
     H      -4.117909      0.404066      -0.237616
Rotational constants (GHz):    5.2827900    1.1812900    1.0219500
Vibrational harmonic frequencies (cm-1):
       52.0126                   88.2886                   98.0573            
      133.3418                  179.8413                  249.1374            
      311.9764                  399.6500                  464.9353            
      545.4590                  739.9036                  795.6206            
      866.9976                  900.6535                  948.7656            
      990.3504                 1041.1932                 1077.2205            
     1102.1061                 1149.5541                 1190.0541            
     1244.2180                 1260.2432                 1299.6645            
     1329.8377                 1340.9162                 1353.6474            
     1392.2452                 1412.6127                 1431.5717            
     1434.6416                 1491.2572                 1505.0018            
     1507.7746                 1516.8472                 1523.8900            
     1530.4656                 3062.0034                 3065.9251            
     3072.6924                 3075.5010                 3092.8925            
     3103.6355                 3113.0938                 3128.0528            
     3142.9474                 3149.3833                 3174.5334            
Zero-point correction (Hartree): 0.159655

C5H11OO.ppmm
-------------------
E(UM052X/6-311G(d,p)) (Hartree): -347.50474411 
Electronic state : 2-A
Cartesian coordinates (Angs):
     O      -1.749555     -1.263168       0.376511
     O      -1.423589     -0.509039      -0.627362
     C      -1.356726      0.888980      -0.232508
     C      -0.189123      1.156952       0.697684
     C       1.175552      1.180907       0.006256
     C       1.607280     -0.135826      -0.644947
     C       1.716020     -1.291167       0.347815
     H      -1.263953      1.422388      -1.177425
     H      -2.310751      1.117095       0.238338
     H      -0.367195      2.128949       1.163105
     H      -0.220260      0.417995       1.499643
     H       1.168597      1.971542      -0.749491
     H       1.927339      1.466064       0.746846
     H       0.913361     -0.405744      -1.442656
     H       2.578248      0.025626      -1.117793
     H       0.739677     -1.577546       0.736404
     H       2.352931     -1.017221       1.191639
     H       2.149135     -2.170575      -0.127602
Rotational constants (GHz):    3.4372100    2.0166800    1.5243800
Vibrational harmonic frequencies (cm-1):
       56.1043                  103.6243                  129.6227            
      177.1587                  245.5052                  264.7390            
      329.9294                  406.2546                  484.8277            
      557.6405                  760.1031                  803.3159            
      857.5941                  887.6730                  920.1111            
      981.3654                 1024.6583                 1047.8851            
     1122.9689                 1134.4853                 1183.4094            
     1224.2837                 1269.7664                 1280.9415            
     1328.7974                 1340.7260                 1379.5161            
     1406.7599                 1410.5880                 1423.9888            
     1438.3583                 1493.9534                 1502.9665            
     1512.0218                 1515.6797                 1525.1265            
     1534.8966                 3043.3035                 3069.8346            
     3073.7977                 3081.9159                 3087.8861            
     3106.2577                 3110.7869                 3124.0792            
     3139.1367                 3151.6891                 3169.0985            
Zero-point correction (Hartree): 0.159985

C5H11OO.ppmp
-------------------
E(UM052X/6-311G(d,p)) (Hartree): -347.50108817 
Electronic state : 2-A
Cartesian coordinates (Angs):
     O       1.964141     -0.866534      -0.806439
     O       1.276230     -0.835674       0.292436
     C       1.171234      0.517704       0.814795
     C       0.376403      1.419906      -0.108249
     C      -1.135820      1.187382      -0.138519
     C      -1.588547     -0.195331      -0.640267
     C      -1.826416     -1.206781       0.481146
     H       0.695984      0.388344       1.785812
     H       2.191856      0.874129       0.940091
     H       0.570098      2.446634       0.211341
     H       0.798132      1.317591      -1.109922
     H      -1.548832      1.359903       0.860351
     H      -1.561169      1.959516      -0.781549
     H      -2.519431     -0.077740      -1.196970
     H      -0.852661     -0.588408      -1.344654
     H      -2.590762     -0.838725       1.167887
     H      -0.918341     -1.401155       1.048408
     H      -2.168966     -2.159699       0.077799
Rotational constants (GHz):    3.4327700    1.9245700    1.5344500
Vibrational harmonic frequencies (cm-1):
       63.7655                   95.5791                  139.4965            
      166.4230                  222.5867                  283.1238            
      321.6338                  386.6406                  458.3476            
      555.3713                  762.8029                  808.2834            
      867.5632                  885.5736                  911.5604            
      982.1872                 1033.8043                 1059.6146            
     1130.2995                 1133.8909                 1177.4214            
     1230.8412                 1275.4792                 1290.7445            
     1326.1925                 1335.7939                 1384.7967            
     1404.7006                 1413.9569                 1427.5971            
     1435.7387                 1492.5263                 1505.8716            
     1509.7318                 1520.2717                 1524.6384            
     1533.3841                 3058.5463                 3074.8585            
     3077.0778                 3078.2898                 3103.0538            
     3112.9124                 3117.4610                 3128.3066            
     3143.6200                 3162.6252                 3178.1099            
Zero-point correction (Hartree): 0.160139

C5H11OO.ppmt
-------------------
E(UM052X/6-311G(d,p)) (Hartree): -347.50418196 
Electronic state : 2-A
Cartesian coordinates (Angs):
     O       2.085502     -1.148360      -0.608064
     O       1.567327     -0.754867       0.513804
     C       1.477403      0.695072       0.571216
     C       0.495350      1.240777      -0.447467
     C      -0.975076      1.001124      -0.106934
     C      -1.387209     -0.469933      -0.050519
     C      -2.897226     -0.622275       0.108307
     H       1.167594      0.896486       1.595625
     H       2.484823      1.070117       0.401619
     H       0.679153      2.314458      -0.527372
     H       0.744384      0.803023      -1.415975
     H      -1.207544      1.478307       0.850535
     H      -1.586644      1.506534      -0.858915
     H      -1.053317     -0.971549      -0.962493
     H      -0.877834     -0.969272       0.774502
     H      -3.423506     -0.172540      -0.735194
     H      -3.241936     -0.127446       1.018004
     H      -3.187252     -1.670883       0.166126
Rotational constants (GHz):    4.3221300    1.4592300    1.2313200
Vibrational harmonic frequencies (cm-1):
       58.7620                   86.4693                  115.9283            
      169.6359                  237.8602                  256.8225            
      302.3320                  370.7044                  475.4386            
      557.5229                  751.6298                  808.7451            
      864.6881                  896.4563                  924.7455            
      973.2478                 1024.5142                 1060.4137            
     1102.1891                 1143.1508                 1191.4123            
     1233.2306                 1273.9384                 1285.8092            
     1327.5828                 1347.3946                 1353.1300            
     1402.9860                 1420.6946                 1424.6374            
     1429.8969                 1494.6071                 1500.7837            
     1512.4392                 1513.7138                 1522.1417            
     1529.1938                 3043.4174                 3065.0107            
     3069.4587                 3072.9334                 3084.2365            
     3103.3392                 3117.8471                 3119.5714            
     3138.1203                 3145.7144                 3165.5054            
Zero-point correction (Hartree): 0.159631

C5H11OO.pppm
-------------------
E(UM052X/6-311G(d,p)) (Hartree): -347.50181426 
Electronic state : 2-A
Cartesian coordinates (Angs):
     O      -2.805326     -0.301270      -0.237013
     O      -1.846376      0.499444      -0.589214
     C      -0.929316      0.737639       0.513178
     C      -0.158601     -0.528138       0.837757
     C       0.764896     -1.000107      -0.295732
     C       2.215025     -0.532535      -0.153045
     C       2.386681      0.985058      -0.149694
     H      -0.296438      1.542220       0.148749
     H      -1.531661      1.076649       1.354007
     H       0.418731     -0.354251       1.749917
     H      -0.899430     -1.291877       1.073626
     H       0.756999     -2.090027      -0.328057
     H       0.360491     -0.663284      -1.253836
     H       2.629270     -0.944817       0.771058
     H       2.799677     -0.956305      -0.971685
     H       1.917685      1.439872       0.723845
     H       1.944292      1.428553      -1.043780
     H       3.441886      1.256375      -0.128818
Rotational constants (GHz):    5.5740700    1.2855600    1.1954300
Vibrational harmonic frequencies (cm-1):
       59.6263                   78.5279                  140.2506            
      174.7495                  266.2861                  288.0210            
      313.3316                  425.6546                  462.6589            
      558.7255                  776.0103                  797.2143            
      836.8069                  900.5546                  922.0323            
      983.2480                 1038.2187                 1050.4654            
     1119.3498                 1150.9225                 1157.3773            
     1232.9652                 1256.3935                 1295.4252            
     1326.4165                 1331.5132                 1380.6520            
     1399.5570                 1414.1076                 1422.7271            
     1432.8816                 1499.2227                 1508.6858            
     1513.6894                 1516.6587                 1529.4112            
     1535.1721                 3064.3751                 3067.8638            
     3069.1153                 3076.3833                 3098.0443            
     3115.4701                 3118.2049                 3125.5952            
     3135.9472                 3143.0630                 3183.4634            
Zero-point correction (Hartree): 0.160139

C5H11OO.pppp
-------------------
E(UM052X/6-311G(d,p)) (Hartree): -347.50472715 
Electronic state : 2-A
Cartesian coordinates (Angs):
     O      -2.664789     -0.430371      -0.092444
     O      -1.719165      0.143956      -0.771826
     C      -0.898445      0.981373       0.084154
     C      -0.133140      0.135481       1.083024
     C       0.686662     -0.982558       0.432790
     C       1.665402     -0.512959      -0.645658
     C       2.661692      0.531345      -0.145357
     H      -0.248268      1.505403      -0.612453
     H      -1.566238      1.687278       0.574240
     H       0.510421      0.804362       1.658189
     H      -0.850387     -0.298264       1.779777
     H       1.242936     -1.497386       1.219720
     H       0.001241     -1.713468       0.001303
     H       2.212293     -1.383531      -1.011579
     H       1.113256     -0.123607      -1.504155
     H       3.181097      0.171080       0.744727
     H       2.171424      1.470175       0.115448
     H       3.410838      0.753193      -0.904771
Rotational constants (GHz):    5.4264200    1.3454500    1.3280100
Vibrational harmonic frequencies (cm-1):
       48.4301                   74.8108                  127.2937            
      211.0984                  219.5456                  308.3098            
      344.0682                  417.0180                  490.4237            
      601.8660                  725.9273                  795.0601            
      848.7223                  902.2812                  916.9089            
      988.4673                 1028.8584                 1048.9347            
     1103.8431                 1155.4911                 1164.6980            
     1231.5625                 1254.4114                 1288.4985            
     1316.3899                 1343.3860                 1380.0718            
     1398.2047                 1414.1405                 1428.6726            
     1433.6730                 1497.2597                 1508.6068            
     1512.9713                 1521.2057                 1528.3490            
     1539.0367                 3063.7551                 3068.8482            
     3079.6687                 3092.9474                 3099.8410            
     3111.3665                 3126.4106                 3131.1881            
     3140.3464                 3143.4197                 3170.7588            
Zero-point correction (Hartree): 0.160262

C5H11OO.pppt
-------------------
E(UM052X/6-311G(d,p)) (Hartree): -347.50494739 
Electronic state : 2-A
Cartesian coordinates (Angs):
     O       2.374831     -0.874531      -0.610500
     O       1.627013     -0.786167       0.447292
     C       1.311024      0.596502       0.753504
     C       0.469126      1.215850      -0.346609
     C      -0.755837      0.380416      -0.721531
     C      -1.669028      0.047569       0.456512
     C      -2.961753     -0.620484      -0.003704
     H       0.782588      0.535192       1.701620
     H       2.256551      1.118564       0.887253
     H       0.157965      2.204198       0.001746
     H       1.099651      1.360367      -1.223455
     H      -1.327042      0.928171      -1.474754
     H      -0.427294     -0.548200      -1.192984
     H      -1.147697     -0.619136       1.146770
     H      -1.901636      0.962573       1.009634
     H      -2.743300     -1.533806      -0.558973
     H      -3.527152      0.042267      -0.660500
     H      -3.598577     -0.883728       0.840277
Rotational constants (GHz):    4.9136400    1.3073100    1.2272400
Vibrational harmonic frequencies (cm-1):
       52.4158                   97.8141                  120.2190            
      204.9295                  234.9200                  263.9559            
      293.9297                  392.8538                  486.1927            
      607.7567                  736.7592                  795.3193            
      859.5883                  906.5441                  933.8961            
      981.1568                 1040.6545                 1068.3455            
     1104.8201                 1154.0523                 1176.8664            
     1239.0420                 1267.7332                 1297.2172            
     1327.4777                 1337.5980                 1357.1063            
     1404.5384                 1415.6354                 1431.9452            
     1433.9305                 1496.8102                 1512.2161            
     1517.9440                 1523.3025                 1527.6845            
     1531.6946                 3054.6670                 3070.0467            
     3073.3605                 3074.9001                 3087.3707            
     3111.4760                 3118.8140                 3125.3844            
     3139.3569                 3149.8921                 3179.5752            
Zero-point correction (Hartree): 0.160200

C5H11OO.pptm
-------------------
E(UM052X/6-311G(d,p)) (Hartree): -347.50466503 
Electronic state : 2-A
Cartesian coordinates (Angs):
     O       2.579917     -0.772102      -0.658282
     O       2.229853     -0.188508       0.447429
     C       1.412225      0.981841       0.180614
     C       0.051045      0.575111      -0.344226
     C      -0.746167     -0.243689       0.669773
     C      -2.056547     -0.791264       0.103574
     C      -3.028401      0.300461      -0.340348
     H       1.348596      1.481388       1.145770
     H       1.964371      1.594325      -0.529218
     H      -0.485911      1.487171      -0.611529
     H       0.198248      0.002521      -1.262573
     H      -0.127785     -1.074301       1.014160
     H      -0.961234      0.377833       1.544944
     H      -1.833096     -1.449759      -0.739647
     H      -2.533918     -1.410524       0.864958
     H      -2.643771      0.858131      -1.194211
     H      -3.209008      1.008815       0.470831
     H      -3.987576     -0.125485      -0.632974
Rotational constants (GHz):    6.4573800    1.1094700    1.0629800
Vibrational harmonic frequencies (cm-1):
       41.4149                   78.5172                  115.9015            
      183.5309                  222.4114                  268.0048            
      292.1145                  403.1509                  487.4478            
      572.2851                  746.9597                  781.2696            
      874.0187                  888.8977                  933.1273            
      984.6476                 1029.7908                 1069.8777            
     1107.6004                 1143.1632                 1191.8216            
     1234.5260                 1266.6042                 1296.0182            
     1326.4053                 1344.6272                 1360.8256            
     1395.6507                 1416.9625                 1426.9638            
     1434.4312                 1497.1856                 1505.8632            
     1510.7185                 1514.4621                 1524.2392            
     1531.4644                 3056.4401                 3066.0391            
     3068.7223                 3077.7322                 3100.1658            
     3102.3288                 3108.2661                 3129.3395            
     3135.6303                 3141.0984                 3166.5699            
Zero-point correction (Hartree): 0.159825

C5H11OO.pptp
-------------------
E(UM052X/6-311G(d,p)) (Hartree): -347.50458180 
Electronic state : 2-A
Cartesian coordinates (Angs):
     O       2.171662      1.297387      -0.014790
     O       2.100523      0.119019      -0.554377
     C       1.561843     -0.851724       0.383240
     C       0.106843     -0.553371       0.680222
     C      -0.774741     -0.645661      -0.563497
     C      -2.256668     -0.406475      -0.271394
     C      -2.551184      1.003833       0.237225
     H       1.693860     -1.804764      -0.125774
     H       2.184876     -0.807552       1.274371
     H      -0.237117     -1.265047       1.435936
     H       0.055683      0.441753       1.121773
     H      -0.428939      0.082702      -1.300854
     H      -0.650078     -1.634628      -1.013158
     H      -2.824629     -0.583048      -1.186479
     H      -2.605239     -1.141979       0.458822
     H      -2.151133      1.750547      -0.451008
     H      -2.107167      1.180918       1.216581
     H      -3.624151      1.170232       0.328351
Rotational constants (GHz):    4.9078600    1.2781600    1.1461800
Vibrational harmonic frequencies (cm-1):
       39.6566                   69.8393                  117.6536            
      174.4418                  235.8160                  270.2290            
      296.8049                  390.3171                  487.8394            
      581.4497                  751.5306                  792.2482            
      861.1753                  887.9829                  937.2774            
      978.5414                 1042.4754                 1060.5045            
     1111.9759                 1154.6658                 1180.0201            
     1233.0969                 1266.5280                 1298.7074            
     1326.4133                 1343.4039                 1365.1239            
     1395.8601                 1414.2439                 1432.5077            
     1440.4045                 1497.0708                 1510.1327            
     1512.0271                 1514.6211                 1526.0176            
     1534.2027                 3063.8252                 3069.0851            
     3077.2991                 3078.4172                 3099.0667            
     3110.2181                 3118.0418                 3136.4183            
     3143.3215                 3152.2117                 3180.0261            
Zero-point correction (Hartree): 0.160066

C5H11OO.pptt
-------------------
E(CCSD(T)/Aug-CC-pVDZ) (Hartree): -346.62472377 
E(CCSD/Aug-CC-pVDZ) (Hartree): -346.58403195 
     T1 diagnostic:  0.020789 
E(MP2/Aug-CC-pVDZ) (Hartree): -346.49965011 
E(MP3/Aug-CC-pVDZ) (Hartree): -346.56417899 
E(PMP2/Aug-CC-pVDZ) (Hartree): -346.50260662 
E(PMP3/Aug-CC-pVDZ) (Hartree): -346.56596702 
E(PUHF/Aug-CC-pVDZ) (Hartree): -345.39835464 
E(UHF/Aug-CC-pVDZ) (Hartree): -345.39354655 
E(UM052X/6-311G(d,p)) (Hartree): -347.50539832 
Electronic state : 2-A
Cartesian coordinates (Angs):
     O      -2.473885     -1.045341       0.554155
     O      -2.102608     -0.489544      -0.558706
     C      -1.639041      0.868234      -0.332628
     C      -0.335311      0.863853       0.437911
     C       0.796477      0.166344      -0.311210
     C       2.094566      0.142981       0.490775
     C       3.224061     -0.554352      -0.261707
     H      -1.524896      1.275020      -1.335769
     H      -2.433646      1.387102       0.199857
     H      -0.063368      1.901679       0.647059
     H      -0.511040      0.375142       1.397978
     H       0.497115     -0.857592      -0.546510
     H       0.969106      0.672167      -1.266340
     H       2.388357      1.167976       0.732226
     H       1.916610     -0.363865       1.442319
     H       3.431062     -0.046677      -1.204988
     H       2.954281     -1.586336      -0.490536
     H       4.143842     -0.567891       0.322281
Rotational constants (GHz):    5.9355600    1.0700600    1.0117800
Vibrational harmonic frequencies (cm-1):
       60.2446                   73.3634                  120.0968            
      157.7908                  207.8169                  250.8731            
      299.3984                  398.9567                  457.9642            
      575.4952                  741.8707                  791.2098            
      882.4888                  896.1342                  945.1331            
      975.5280                 1057.2995                 1072.2708            
     1099.0860                 1152.6681                 1193.3457            
     1240.3009                 1267.4466                 1295.6468            
     1332.8542                 1338.2878                 1350.8024            
     1392.8863                 1417.5868                 1432.6740            
     1434.8016                 1497.5586                 1509.3222            
     1515.2082                 1517.6994                 1524.4834            
     1529.4104                 3055.0333                 3064.5221            
     3074.1218                 3077.9582                 3089.5042            
     3107.8346                 3124.0275                 3134.0391            
     3140.2024                 3151.4479                 3188.6111            
Zero-point correction (Hartree): 0.159958

C5H11OO.ptmm
-------------------
E(UM052X/6-311G(d,p)) (Hartree): -347.50364402 
Electronic state : 2-A
Cartesian coordinates (Angs):
     O       3.008398      0.222943      -0.124061
     O       2.169646     -0.757076       0.021695
     C       0.892453     -0.279823       0.515941
     C       0.163101      0.494796      -0.562988
     C      -1.116004      1.146581      -0.032963
     C      -2.125664      0.169455       0.577197
     C      -2.562133     -0.927868      -0.391297
     H       0.370752     -1.187102       0.811886
     H       1.097872      0.339199       1.389095
     H       0.840489      1.265984      -0.930286
     H      -0.056798     -0.173225      -1.397092
     H      -0.847028      1.898013       0.713577
     H      -1.595804      1.680471      -0.856290
     H      -1.712135     -0.280914       1.483016
     H      -3.001627      0.737062       0.895930
     H      -1.739125     -1.598221      -0.641388
     H      -2.931384     -0.494151      -1.322477
     H      -3.360074     -1.532897       0.037613
Rotational constants (GHz):    6.2616300    1.1438800    1.0695100
Vibrational harmonic frequencies (cm-1):
       66.7025                   87.5891                  132.7113            
      173.7207                  231.7951                  292.1679            
      311.2294                  378.3438                  488.8718            
      580.8085                  743.6090                  812.8850            
      863.8977                  873.5464                  966.5642            
      991.6988                 1022.9018                 1047.1128            
     1123.6403                 1154.1113                 1172.4822            
     1239.2000                 1269.1673                 1290.2061            
     1332.3957                 1337.9202                 1358.4105            
     1395.7348                 1407.8431                 1434.4780            
     1437.8574                 1500.8994                 1513.8872            
     1516.6648                 1522.1341                 1528.5512            
     1541.1945                 3060.4267                 3069.7016            
     3072.7373                 3090.5886                 3102.9187            
     3109.5086                 3115.9494                 3136.3651            
     3140.1046                 3142.4894                 3177.0223            
Zero-point correction (Hartree): 0.160294

C5H11OO.ptmp
-------------------
E(UM052X/6-311G(d,p)) (Hartree): -347.50121813 
Electronic state : 2-A
Cartesian coordinates (Angs):
     O      -3.022717     -0.234875      -0.141361
     O      -2.147925      0.724723      -0.161773
     C      -0.925244      0.331528       0.509238
     C      -0.164830     -0.682792      -0.323281
     C       1.167626     -1.086256       0.330982
     C       2.383088     -0.339238      -0.222626
     C       2.315091      1.175864      -0.046459
     H      -0.382438      1.263525       0.642237
     H      -1.209548     -0.079787       1.476778
     H      -0.814278     -1.549102      -0.443270
     H       0.011311     -0.267670      -1.318512
     H       1.109900     -0.928278       1.412942
     H       1.325180     -2.155537       0.188628
     H       3.280472     -0.718744       0.269536
     H       2.486018     -0.575139      -1.284777
     H       2.170210      1.440183       1.003023
     H       1.497248      1.609176      -0.623300
     H       3.236667      1.647957      -0.385340
Rotational constants (GHz):    6.0775400    1.1624800    1.0440600
Vibrational harmonic frequencies (cm-1):
       71.1393                   98.7961                  137.2919            
      146.0162                  253.6959                  289.2045            
      310.2972                  353.1531                  472.4489            
      580.7186                  762.1612                  791.7558            
      844.9209                  892.4909                  967.4523            
      995.3104                 1041.3163                 1047.1345            
     1122.4450                 1146.4146                 1178.0474            
     1242.1566                 1262.6979                 1295.2431            
     1324.4752                 1345.1562                 1352.8631            
     1393.6789                 1401.5857                 1426.4893            
     1432.4607                 1507.6227                 1509.1438            
     1513.8218                 1522.7263                 1527.8400            
     1536.0380                 3049.2932                 3061.2462            
     3064.9620                 3080.4455                 3096.6765            
     3107.9411                 3113.4758                 3127.9996            
     3132.2702                 3139.7136                 3182.6197            
Zero-point correction (Hartree): 0.160048

C5H11OO.ptmt
-------------------
E(UM052X/6-311G(d,p)) (Hartree): -347.50393718 
Electronic state : 2-A
Cartesian coordinates (Angs):
     O       3.147566      0.368995       0.285345
     O       2.455172     -0.596819      -0.237196
     C       1.077375     -0.555734       0.212027
     C       0.353087      0.622399      -0.408007
     C      -1.076159      0.762028       0.116645
     C      -1.982193     -0.421829      -0.221389
     C      -3.429540     -0.164677       0.188256
     H       0.672903     -1.514331      -0.102569
     H       1.095568     -0.490509       1.299763
     H       0.926076      1.520319      -0.175581
     H       0.344986      0.503247      -1.493722
     H      -1.055790      0.904819       1.201323
     H      -1.512748      1.669641      -0.305977
     H      -1.930078     -0.615791      -1.296280
     H      -1.623724     -1.324753       0.278093
     H      -3.826195      0.711257      -0.326874
     H      -3.499627      0.019822       1.261309
     H      -4.068699     -1.014251      -0.049877
Rotational constants (GHz):    9.5237300    0.9329500    0.8946000
Vibrational harmonic frequencies (cm-1):
       61.6543                   77.4809                  116.9276            
      148.0079                  242.0977                  268.8018            
      291.9461                  310.3485                  491.1272            
      592.4368                  744.6738                  789.4436            
      867.3302                  885.8128                  967.1518            
     1005.8698                 1023.5666                 1065.8961            
     1113.8010                 1153.0254                 1193.5238            
     1241.3865                 1272.7319                 1304.1167            
     1330.3870                 1342.5316                 1350.5062            
     1372.1220                 1424.1947                 1428.8160            
     1435.4330                 1506.0996                 1510.5134            
     1516.6360                 1521.3507                 1523.7132            
     1530.2488                 3053.6647                 3061.8320            
     3069.6177                 3079.9954                 3085.7705            
     3106.3616                 3111.8553                 3133.4783            
     3139.0712                 3148.2914                 3180.4958            
Zero-point correction (Hartree): 0.159909

C5H11OO.ptpm
-------------------
E(UM052X/6-311G(d,p)) (Hartree): -347.50169489 
Electronic state : 2-A
Cartesian coordinates (Angs):
     O       2.272990      0.996658      -0.513569
     O       2.318042     -0.109255       0.165797
     C       1.006020     -0.447011       0.680421
     C       0.106462     -0.941142      -0.436934
     C      -1.346021     -1.116240       0.037678
     C      -2.243744      0.074672      -0.308441
     C      -1.777642      1.399540       0.291798
     H       1.195488     -1.220879       1.421757
     H       0.614933      0.445797       1.162225
     H       0.148989     -0.218698      -1.254247
     H       0.510866     -1.881043      -0.813037
     H      -1.768196     -2.013614      -0.414631
     H      -1.365053     -1.282623       1.119969
     H      -2.289893      0.169649      -1.396330
     H      -3.259072     -0.139546       0.030555
     H      -0.801204      1.693046      -0.095603
     H      -1.706911      1.330607       1.379537
     H      -2.478661      2.199173       0.054841
Rotational constants (GHz):    4.4412700    1.4100900    1.2005200
Vibrational harmonic frequencies (cm-1):
       56.4551                   89.0403                  138.4585            
      162.7343                  260.0142                  295.9864            
      318.5172                  362.3752                  459.6122            
      589.6018                  760.8786                  797.6207            
      849.4075                  890.1933                  967.1132            
      993.4793                 1043.9818                 1050.0644            
     1118.9129                 1150.0011                 1180.6105            
     1236.5763                 1265.9801                 1291.8679            
     1324.7250                 1341.1266                 1356.3980            
     1393.1108                 1398.9079                 1426.5463            
     1436.3199                 1508.3605                 1508.9915            
     1515.5305                 1522.0416                 1529.7688            
     1540.2653                 3048.1455                 3062.0808            
     3066.1802                 3083.3356                 3099.4636            
     3113.0448                 3124.1026                 3132.1925            
     3133.7486                 3140.6049                 3185.6912            
Zero-point correction (Hartree): 0.160201

C5H11OO.ptpp
-------------------
E(UM052X/6-311G(d,p)) (Hartree): -347.50378659 
Electronic state : 2-A
Cartesian coordinates (Angs):
     O       2.365919      1.053834      -0.257976
     O       2.321369     -0.153786       0.217001
     C       0.965941     -0.508702       0.591008
     C       0.126525     -0.736875      -0.649108
     C      -1.322148     -1.097307      -0.311447
     C      -2.062393     -0.039161       0.514169
     C      -2.024615      1.350447      -0.119227
     H       1.074650     -1.413021       1.187369
     H       0.591268      0.306039       1.206746
     H       0.164453      0.168605      -1.255033
     H       0.581241     -1.538310      -1.233474
     H      -1.859742     -1.250320      -1.249762
     H      -1.345622     -2.052108       0.220095
     H      -3.099828     -0.358574       0.626350
     H      -1.651306      0.006831       1.525259
     H      -2.379395      1.312127      -1.150989
     H      -1.014711      1.762166      -0.130151
     H      -2.659174      2.045766       0.429023
Rotational constants (GHz):    4.5534000    1.3726900    1.1913700
Vibrational harmonic frequencies (cm-1):
       47.6157                   81.2787                  141.6550            
      181.7881                  234.1562                  296.0644            
      309.5107                  370.9092                  484.3252            
      593.8457                  740.0592                  812.2622            
      864.0282                  866.7767                  964.0291            
      987.8603                 1026.8908                 1044.3911            
     1122.1447                 1157.0047                 1171.7998            
     1234.6419                 1275.5525                 1285.4087            
     1323.2896                 1344.3730                 1353.6210            
     1393.6268                 1405.7659                 1430.1349            
     1436.7580                 1502.1168                 1511.9857            
     1517.1630                 1523.4404                 1531.1671            
     1541.3207                 3061.2243                 3067.1130            
     3069.9059                 3089.1325                 3093.5828            
     3103.4035                 3108.0488                 3134.8320            
     3139.5191                 3142.9495                 3169.1274            
Zero-point correction (Hartree): 0.160127

C5H11OO.ptpt
-------------------
E(UM052X/6-311G(d,p)) (Hartree): -347.50374215 
Electronic state : 2-A
Cartesian coordinates (Angs):
     O      -2.863603     -0.728391      -0.554388
     O      -2.544812      0.098632       0.394642
     C      -1.123366      0.043749       0.673098
     C      -0.350859      0.743313      -0.427399
     C       1.146866      0.821364      -0.128837
     C       1.842160     -0.538573      -0.069391
     C       3.354423     -0.394885       0.076735
     H      -1.014622      0.549306       1.631327
     H      -0.864080     -1.008138       0.767205
     H      -0.523508      0.205726      -1.361319
     H      -0.761779      1.747641      -0.543947
     H       1.623081      1.423681      -0.905719
     H       1.307655      1.352194       0.814632
     H       1.454817     -1.124296       0.766930
     H       1.608398     -1.098198      -0.978885
     H       3.604112      0.154545       0.985763
     H       3.773183      0.152292      -0.769075
     H       3.844716     -1.366485       0.125823
Rotational constants (GHz):    7.5553800    0.9709000    0.9416300
Vibrational harmonic frequencies (cm-1):
       54.3774                   70.5057                  124.4479            
      135.2043                  239.7985                  259.5350            
      288.3537                  318.5775                  478.9431            
      601.3139                  744.0786                  793.2412            
      862.0799                  884.6453                  962.3044            
     1005.3231                 1023.9922                 1062.8272            
     1111.2897                 1153.0369                 1196.4688            
     1240.3801                 1280.7080                 1297.5416            
     1335.6188                 1339.9872                 1357.6953            
     1372.3238                 1423.3298                 1430.3538            
     1434.9163                 1505.5313                 1507.7179            
     1514.9833                 1521.1499                 1522.5418            
     1528.9755                 3053.0241                 3064.4610            
     3069.4442                 3080.6003                 3088.9946            
     3105.5868                 3114.8947                 3129.6771            
     3137.0728                 3143.9616                 3176.3876            
Zero-point correction (Hartree): 0.159809

C5H11OO.pttm
-------------------
E(UM052X/6-311G(d,p)) (Hartree): -347.50396236 
Electronic state : 2-A
Cartesian coordinates (Angs):
     O       2.668854      1.089942       0.205751
     O       2.535203     -0.076128      -0.349006
     C       1.392085     -0.782452       0.193980
     C       0.098601     -0.151068      -0.275286
     C      -1.109386     -0.876026       0.316413
     C      -2.443780     -0.370708      -0.234632
     C      -2.708463      1.099771       0.082275
     H       1.510022     -1.801139      -0.170241
     H       1.485789     -0.756493       1.278923
     H       0.109064      0.895999       0.026896
     H       0.059379     -0.184268      -1.366957
     H      -1.022301     -1.946688       0.112292
     H      -1.102095     -0.760447       1.404446
     H      -2.464300     -0.523591      -1.316626
     H      -3.247295     -0.980084       0.182695
     H      -1.993625      1.752811      -0.417371
     H      -2.635280      1.281296       1.156276
     H      -3.706158      1.394977      -0.240788
Rotational constants (GHz):    6.0318600    1.0608800    0.9526600
Vibrational harmonic frequencies (cm-1):
       44.7870                   74.0096                  112.0369            
      140.8092                  180.1050                  273.7698            
      307.6820                  372.6481                  467.5479            
      570.9357                  754.7532                  788.4658            
      860.6991                  903.5063                  967.9164            
     1002.4535                 1020.8325                 1073.9512            
     1112.3273                 1153.3574                 1198.8181            
     1235.4725                 1272.9195                 1291.6161            
     1323.3872                 1339.8704                 1344.8680            
     1394.4248                 1403.6872                 1432.0673            
     1438.0338                 1505.4426                 1509.9280            
     1511.2379                 1524.4895                 1526.3660            
     1534.5504                 3051.6406                 3062.9194            
     3071.1599                 3075.8323                 3088.6748            
     3100.1881                 3109.4243                 3136.0727            
     3141.2215                 3149.1194                 3174.2595            
Zero-point correction (Hartree): 0.159769

C5H11OO.pttp
-------------------
E(UM052X/6-311G(d,p)) (Hartree): -347.50394878 
Electronic state : 2-A
Cartesian coordinates (Angs):
     O      -2.828204     -0.704289       0.650609
     O      -2.483603     -0.197468      -0.494145
     C      -1.368958      0.716021      -0.342864
     C      -0.097274     -0.041183      -0.023197
     C       1.095129      0.908089       0.084796
     C       2.373360      0.214574       0.558837
     C       2.859504     -0.874282      -0.395368
     H      -1.311343      1.229325      -1.300916
     H      -1.635364      1.418092       0.445959
     H      -0.241529     -0.573239       0.919043
     H       0.068176     -0.784895      -0.803725
     H       1.278330      1.374691      -0.887976
     H       0.848555      1.714934       0.780053
     H       3.155726      0.966435       0.676802
     H       2.199726     -0.214966       1.548648
     H       2.977195     -0.477020      -1.405456
     H       2.161079     -1.709450      -0.441649
     H       3.823342     -1.269157      -0.075714
Rotational constants (GHz):    6.5609500    0.9996700    0.9584200
Vibrational harmonic frequencies (cm-1):
       66.7116                   92.9511                  121.1213            
      145.0459                  184.4097                  268.7789            
      306.6221                  371.3347                  463.4618            
      575.9752                  756.0099                  792.1386            
      864.9800                  897.7401                  964.5747            
     1006.2743                 1011.5122                 1075.0295            
     1113.1619                 1151.6994                 1200.6252            
     1237.0108                 1274.7293                 1288.0367            
     1329.5789                 1340.2501                 1344.0798            
     1395.2469                 1403.7709                 1432.8594            
     1437.7860                 1506.6168                 1508.2789            
     1514.4340                 1525.3404                 1527.8202            
     1530.3629                 3052.7853                 3071.9336            
     3075.3944                 3087.0904                 3091.6067            
     3101.2419                 3113.1212                 3136.5178            
     3142.7910                 3149.8805                 3166.7629            
Zero-point correction (Hartree): 0.159963

C5H11OO.pttt
-------------------
E(UM052X/6-311G(d,p)) (Hartree): -347.50462942 
Electronic state : 2-A
Cartesian coordinates (Angs):
     O      -3.033336     -0.781432       0.400984
     O      -2.690320      0.230142      -0.337146
     C      -1.412596      0.769997       0.081768
     C      -0.285249     -0.167956      -0.294219
     C       1.069067      0.393397       0.130798
     C       2.224622     -0.533926      -0.236273
     C       3.575195      0.031452       0.192808
     H      -1.342677      1.724819      -0.435797
     H      -1.469066      0.927564       1.157950
     H      -0.463712     -1.129613       0.189434
     H      -0.302911     -0.331055      -1.373971
     H       1.228577      1.368834      -0.339062
     H       1.072930      0.562000       1.211883
     H       2.063961     -1.507529       0.232825
     H       2.219599     -0.702018      -1.315925
     H       3.604559      0.184431       1.272662
     H       3.760695      0.994342      -0.285700
     H       4.391061     -0.639254      -0.074291
Rotational constants (GHz):   10.0199300    0.8556200    0.8279200
Vibrational harmonic frequencies (cm-1):
       62.7129                   79.7417                  122.1870            
      148.4445                  154.9726                  245.2399            
      297.0066                  353.9643                  448.0065            
      581.0196                  750.4792                  786.0052            
      871.6852                  915.2437                  966.8704            
     1007.2157                 1048.5564                 1082.6281            
     1093.9662                 1158.2034                 1208.7121            
     1240.9508                 1274.1096                 1287.7219            
     1328.7014                 1342.1976                 1354.1698            
     1365.1637                 1419.7207                 1434.9920            
     1438.7717                 1509.5731                 1512.7913            
     1515.5870                 1521.5366                 1525.8383            
     1534.3854                 3052.8703                 3069.8955            
     3073.0743                 3080.3509                 3083.8819            
     3107.1197                 3107.5812                 3130.6425            
     3139.8696                 3146.7052                 3170.5508            
Zero-point correction (Hartree): 0.159817

C5H11OO.tpmm
-------------------
E(UM052X/6-311G(d,p)) (Hartree): -347.50304125 
Electronic state : 2-A
Cartesian coordinates (Angs):
     O       2.458981     -0.977909       0.292791
     O       1.367143     -0.526095      -0.241242
     C       1.223086      0.902733      -0.017066
     C      -0.132876      1.334444      -0.535234
     C      -1.295654      1.023722       0.410905
     C      -1.529630     -0.461847       0.698217
     C      -1.844410     -1.271338      -0.557684
     H       1.336925      1.068997       1.054011
     H       2.042946      1.379664      -0.551388
     H      -0.089640      2.413113      -0.697465
     H      -0.289441      0.880453      -1.515701
     H      -1.123552      1.550611       1.353335
     H      -2.208367      1.443782      -0.019269
     H      -0.659406     -0.890130       1.197893
     H      -2.362884     -0.541576       1.399218
     H      -0.978408     -1.328978      -1.215272
     H      -2.669919     -0.819411      -1.111922
     H      -2.130339     -2.290781      -0.300665
Rotational constants (GHz):    3.6730500    1.7174900    1.3566600
Vibrational harmonic frequencies (cm-1):
       54.6887                   78.8455                  118.4804            
      179.4083                  247.9415                  264.8660            
      342.5561                  385.0807                  451.1286            
      547.3358                  754.1313                  795.1768            
      879.7786                  887.0694                  921.6032            
     1011.3058                 1022.0119                 1055.1811            
     1129.4876                 1142.7689                 1173.4517            
     1241.9982                 1277.4020                 1281.0677            
     1302.3780                 1342.6782                 1382.4243            
     1407.1183                 1414.6097                 1434.9768            
     1436.5631                 1495.5256                 1509.7148            
     1513.2032                 1521.0930                 1527.7435            
     1541.6981                 3058.7390                 3071.1357            
     3075.8757                 3087.6353                 3096.0649            
     3102.4982                 3114.4742                 3132.8215            
     3140.4591                 3160.3426                 3164.3628            
Zero-point correction (Hartree): 0.160103

C5H11OO.tpmp
-------------------
E(UM052X/6-311G(d,p)) (Hartree): -347.50031050 
Electronic state : 2-A
Cartesian coordinates (Angs):
     O       2.327872     -0.972228      -0.017766
     O       1.397519     -0.200489      -0.488082
     C       1.062995      0.856699       0.450951
     C      -0.143993      1.597198      -0.084464
     C      -1.496311      0.915866       0.140967
     C      -1.662860     -0.463627      -0.518499
     C      -1.288314     -1.633967       0.391420
     H       0.882703      0.385935       1.416508
     H       1.942007      1.496333       0.513893
     H      -0.158976      2.579494       0.392091
     H       0.014918      1.769500      -1.151944
     H      -1.677424      0.825040       1.216341
     H      -2.261985      1.592294      -0.242305
     H      -2.705914     -0.584147      -0.815236
     H      -1.070574     -0.502612      -1.434609
     H      -1.899441     -1.622609       1.295737
     H      -0.241479     -1.605474       0.687707
     H      -1.456067     -2.585036      -0.113646
Rotational constants (GHz):    3.3840900    1.9417900    1.3811900
Vibrational harmonic frequencies (cm-1):
       68.6239                   89.9684                  124.4878            
      170.7407                  210.5714                  285.9094            
      299.8431                  374.4694                  428.6341            
      536.3082                  769.1958                  798.0931            
      856.7347                  895.7845                  926.8777            
     1015.0628                 1022.8993                 1070.3872            
     1129.8816                 1138.3848                 1173.0702            
     1241.3137                 1280.5515                 1286.9805            
     1309.7132                 1331.7255                 1386.5970            
     1402.1017                 1412.8166                 1436.3987            
     1438.1644                 1487.2316                 1509.1148            
     1513.8194                 1525.0914                 1526.7125            
     1530.4909                 3055.0986                 3069.0282            
     3074.2218                 3084.4201                 3103.3205            
     3109.4714                 3114.0663                 3117.5388            
     3146.4692                 3167.2416                 3170.7420            
Zero-point correction (Hartree): 0.159965

C5H11OO.tpmt
-------------------
E(UM052X/6-311G(d,p)) (Hartree): -347.50287609 
Electronic state : 2-A
Cartesian coordinates (Angs):
     O       2.556878     -1.237463       0.148659
     O       1.600687     -0.532846      -0.371572
     C       1.410499      0.712291       0.352715
     C       0.248086      1.453197      -0.275159
     C      -1.130092      0.955934       0.161615
     C      -1.435810     -0.492572      -0.217626
     C      -2.874487     -0.868705       0.125036
     H       1.230376      0.451408       1.395601
     H       2.346985      1.260458       0.268581
     H       0.350872      2.507625      -0.012426
     H       0.350018      1.386214      -1.361229
     H      -1.225081      1.071966       1.245985
     H      -1.888461      1.603905      -0.285292
     H      -1.256731     -0.630039      -1.286615
     H      -0.747756     -1.165935       0.295049
     H      -3.580256     -0.237621      -0.417443
     H      -3.064365     -0.739752       1.191992
     H      -3.085302     -1.906622      -0.130378
Rotational constants (GHz):    4.2957600    1.3648100    1.1033800
Vibrational harmonic frequencies (cm-1):
       67.6127                   70.3458                  103.0520            
      144.8607                  230.6180                  245.9942            
      310.6431                  333.8795                  458.1288            
      540.7425                  746.4374                  796.5878            
      871.9709                  903.3488                  937.1690            
     1011.4956                 1018.3419                 1066.7292            
     1113.9473                 1153.5869                 1180.9701            
     1248.7327                 1282.7400                 1288.1108            
     1301.4150                 1344.6479                 1356.3070            
     1398.5644                 1424.4867                 1430.5962            
     1433.9180                 1486.2618                 1502.5437            
     1512.8707                 1521.6873                 1527.7543            
     1529.6099                 3050.2696                 3065.7296            
     3071.2603                 3074.4631                 3086.0289            
     3097.7898                 3109.5531                 3117.1228            
     3134.2437                 3147.3358                 3158.0447            
Zero-point correction (Hartree): 0.159491

C5H11OO.tppm
-------------------
E(UM052X/6-311G(d,p)) (Hartree): -347.50129828 
Electronic state : 2-A
Cartesian coordinates (Angs):
     O      -2.284168      1.083123      -0.074459
     O      -1.578762      0.071242      -0.477112
     C      -1.010423     -0.659190       0.640768
     C       0.058539     -1.576821       0.092415
     C       1.207965     -0.849408      -0.612578
     C       1.933385      0.183158       0.267119
     C       1.439331      1.616935       0.064080
     H      -0.621443      0.078490       1.339548
     H      -1.826318     -1.208278       1.108719
     H       0.452460     -2.152567       0.933720
     H      -0.405550     -2.288343      -0.592968
     H       1.914195     -1.608537      -0.950629
     H       0.824751     -0.357881      -1.508840
     H       1.837980     -0.101768       1.319293
     H       3.001053      0.155710       0.045550
     H       0.372244      1.720968       0.255602
     H       1.612713      1.929416      -0.966459
     H       1.968578      2.309836       0.718205
Rotational constants (GHz):    3.4828000    1.8377800    1.3646200
Vibrational harmonic frequencies (cm-1):
       66.4958                  104.3045                  110.6686            
      189.3368                  206.5336                  254.2092            
      352.1658                  365.2136                  456.9263            
      547.1809                  752.8691                  776.5158            
      852.5780                  904.3831                  932.1736            
     1014.8881                 1029.4960                 1067.5003            
     1123.9945                 1129.9502                 1176.4036            
     1248.3919                 1251.2596                 1285.7173            
     1311.9376                 1330.5384                 1375.2637            
     1399.0703                 1405.8179                 1433.0805            
     1441.0052                 1494.8645                 1510.4780            
     1517.2520                 1521.2334                 1529.1778            
     1541.3447                 3052.0777                 3067.8211            
     3073.2492                 3075.5196                 3100.9276            
     3114.3671                 3116.8203                 3121.2065            
     3135.0058                 3154.6565                 3180.9514            
Zero-point correction (Hartree): 0.159934

C5H11OO.tppp
-------------------
E(UM052X/6-311G(d,p)) (Hartree): -347.50356734 
Electronic state : 2-A
Cartesian coordinates (Angs):
     O       2.695325     -0.909939      -0.064807
     O       1.818209     -0.001241      -0.361660
     C       0.973613      0.307425       0.777117
     C      -0.100619      1.260916       0.302570
     C      -0.935574      0.711269      -0.859314
     C      -1.574810     -0.653306      -0.593268
     C      -2.490479     -0.665348       0.629277
     H       0.575883     -0.638343       1.140270
     H       1.613685      0.748576       1.539223
     H      -0.738013      1.489860       1.158909
     H       0.368806      2.197943      -0.000736
     H      -1.722251      1.434899      -1.085776
     H      -0.302251      0.642554      -1.744293
     H      -2.151224     -0.936243      -1.475630
     H      -0.797755     -1.413706      -0.486269
     H      -3.248126      0.116732       0.549196
     H      -1.936375     -0.496861       1.553508
     H      -3.003438     -1.621715       0.725044
Rotational constants (GHz):    4.6160500    1.3547700    1.2765100
Vibrational harmonic frequencies (cm-1):
       52.6923                  103.3807                  120.5629            
      186.0355                  224.8334                  302.7909            
      334.2817                  395.3401                  469.9997            
      571.0272                  727.1338                  792.5132            
      865.3085                  910.9126                  923.2638            
     1007.6018                 1025.5480                 1051.5404            
     1114.6016                 1151.7850                 1167.1882            
     1247.0150                 1260.7175                 1283.8148            
     1301.5204                 1343.3290                 1379.8836            
     1399.0842                 1413.5593                 1434.5439            
     1437.5004                 1497.7225                 1513.6091            
     1516.4549                 1526.2944                 1531.2085            
     1543.6594                 3069.8422                 3070.7830            
     3084.1793                 3086.7499                 3111.7673            
     3113.8093                 3116.4960                 3130.8596            
     3138.3903                 3145.7587                 3175.0957            
Zero-point correction (Hartree): 0.160319

C5H11OO.tppt
-------------------
E(UM052X/6-311G(d,p)) (Hartree): -347.50369510 
Electronic state : 2-A
Cartesian coordinates (Angs):
     O       2.519684     -1.278025      -0.011583
     O       1.738753     -0.354634      -0.481265
     C       1.339828      0.579487       0.554357
     C       0.254576      1.462369      -0.022922
     C      -0.950103      0.681502      -0.553995
     C      -1.603881     -0.231270       0.481609
     C      -2.901370     -0.839874      -0.043892
     H       1.001338     -0.013161       1.401482
     H       2.227413      1.143362       0.836535
     H      -0.064353      2.145352       0.768454
     H       0.680945      2.071854      -0.821108
     H      -1.691407      1.397329      -0.917054
     H      -0.641500      0.083882      -1.413640
     H      -0.916783     -1.036122       0.751071
     H      -1.804391      0.335955       1.395511
     H      -2.714782     -1.408058      -0.956338
     H      -3.627144     -0.059881      -0.278703
     H      -3.351134     -1.512534       0.685636
Rotational constants (GHz):    4.4160300    1.3132800    1.1232400
Vibrational harmonic frequencies (cm-1):
       17.0601                   68.7174                   85.1964            
      199.6722                  207.3746                  247.5338            
      293.7594                  361.1478                  471.6196            
      559.7049                  735.6756                  789.6067            
      877.8585                  906.4534                  936.3030            
     1006.8165                 1028.6918                 1066.2845            
     1112.1467                 1155.6894                 1176.4683            
     1248.8383                 1270.0679                 1284.6225            
     1315.3709                 1336.4111                 1354.4169            
     1400.4347                 1418.4231                 1431.2403            
     1436.4004                 1494.9142                 1509.6998            
     1517.0011                 1521.7697                 1529.3678            
     1532.2066                 3054.1957                 3069.1520            
     3070.2870                 3080.5540                 3089.4337            
     3108.7257                 3120.6004                 3128.2713            
     3136.5664                 3147.5446                 3174.3782            
Zero-point correction (Hartree): 0.159665

C5H11OO.tptm
-------------------
E(UM052X/6-311G(d,p)) (Hartree): -347.50364264 
Electronic state : 2-A
Cartesian coordinates (Angs):
     O       3.299272     -0.351542       0.089437
     O       2.064872     -0.356519      -0.307776
     C       1.343090      0.799918       0.190413
     C      -0.092111      0.664275      -0.264244
     C      -0.801369     -0.524646       0.383647
     C      -2.199924     -0.771867      -0.181799
     C      -3.159593      0.395264       0.042658
     H       1.440232      0.792882       1.275691
     H       1.835358      1.679866      -0.219420
     H      -0.605098      1.596753      -0.023366
     H      -0.106872      0.559969      -1.352409
     H      -0.190836     -1.417608       0.241637
     H      -0.870878     -0.353391       1.462520
     H      -2.120658     -0.982157      -1.251507
     H      -2.611079     -1.670068       0.281812
     H      -2.849961      1.282862      -0.509232
     H      -3.206792      0.656766       1.101721
     H      -4.167125      0.140948      -0.284793
Rotational constants (GHz):    8.7573500    0.9791800    0.9261000
Vibrational harmonic frequencies (cm-1):
       45.0236                   79.7085                  107.4899            
      146.3841                  212.6966                  266.7116            
      286.3352                  363.3853                  442.9323            
      575.4220                  738.2975                  782.7424            
      864.5274                  898.9167                  937.2415            
     1006.0441                 1025.7603                 1079.3171            
     1110.3584                 1150.3555                 1181.3835            
     1245.3679                 1272.5229                 1284.3010            
     1309.6686                 1345.2437                 1357.3788            
     1395.9108                 1417.3990                 1431.0012            
     1437.3152                 1491.3289                 1510.3733            
     1513.7348                 1523.8427                 1524.6345            
     1532.7837                 3050.6977                 3064.0029            
     3071.1750                 3075.8892                 3097.0868            
     3101.5638                 3102.6045                 3125.9773            
     3137.8382                 3147.3959                 3158.3608            
Zero-point correction (Hartree): 0.159532

C5H11OO.tptp
-------------------
E(UM052X/6-311G(d,p)) (Hartree): -347.50351348 
Electronic state : 2-A
Cartesian coordinates (Angs):
     O       3.153951     -0.584299       0.263998
     O       1.894184     -0.584005      -0.043659
     C       1.420602      0.756399      -0.336145
     C      -0.072151      0.664204      -0.556657
     C      -0.824732      0.252425       0.708045
     C      -2.343749      0.250007       0.534621
     C      -2.835027     -0.773142      -0.488249
     H       1.680381      1.378522       0.519617
     H       1.959010      1.097195      -1.218853
     H      -0.424935      1.641396      -0.897022
     H      -0.256824     -0.044716      -1.365104
     H      -0.490501     -0.740941       1.015107
     H      -0.555150      0.939862       1.514437
     H      -2.804361      0.038996       1.501235
     H      -2.675390      1.250225       0.242961
     H      -2.463390     -1.769564      -0.243099
     H      -2.499875     -0.528961      -1.496055
     H      -3.923689     -0.814938      -0.505632
Rotational constants (GHz):    6.6736100    1.0276100    1.0005100
Vibrational harmonic frequencies (cm-1):
       39.5199                   85.5522                  104.2462            
      151.7463                  220.2761                  267.0371            
      295.3759                  358.2984                  438.0750            
      583.5924                  747.8915                  788.5143            
      859.8836                  901.2813                  937.5933            
     1005.7029                 1031.4652                 1073.9511            
     1114.0509                 1156.8435                 1181.3016            
     1242.1492                 1276.0415                 1284.4852            
     1320.8293                 1341.9280                 1363.0540            
     1396.8330                 1416.9441                 1435.8918            
     1439.3044                 1493.6877                 1510.8031            
     1515.0488                 1524.9582                 1529.0507            
     1532.0526                 3056.9323                 3063.8124            
     3069.8910                 3080.0211                 3097.6556            
     3105.7658                 3110.9272                 3129.6390            
     3137.5368                 3145.8461                 3170.4665            
Zero-point correction (Hartree): 0.159776

C5H11OO.tptt
-------------------
E(UM052X/6-311G(d,p)) (Hartree): -347.50433372 
Electronic state : 2-A
Cartesian coordinates (Angs):
     O       3.149767     -0.866071       0.028530
     O       1.987022     -0.461482      -0.379193
     C       1.555246      0.721907       0.341791
     C       0.160351      1.053555      -0.136967
     C      -0.863294     -0.015620       0.236068
     C      -2.262425      0.314053      -0.275113
     C      -3.282390     -0.753382       0.109846
     H       1.585368      0.476532       1.402919
     H       2.276868      1.506955       0.122912
     H      -0.127622      2.013475       0.298342
     H       0.183860      1.188073      -1.220935
     H      -0.544131     -0.978276      -0.169046
     H      -0.890776     -0.124868       1.324782
     H      -2.573768      1.283487       0.123090
     H      -2.230462      0.418761      -1.362528
     H      -3.345676     -0.853783       1.194502
     H      -2.996806     -1.723840      -0.298314
     H      -4.276086     -0.509164      -0.264165
Rotational constants (GHz):    7.0173000    0.9656800    0.8923500
Vibrational harmonic frequencies (cm-1):
       34.0215                   58.0373                   91.0444            
      139.8660                  190.8495                  231.8359            
      290.2363                  370.5757                  408.4633            
      569.9977                  735.2823                  781.2777            
      878.5684                  899.6809                  950.4549            
      999.3489                 1053.8826                 1082.7452            
     1102.6931                 1161.7018                 1186.1667            
     1250.6629                 1270.8917                 1280.0731            
     1313.7468                 1336.4276                 1348.5598            
     1388.9690                 1418.2167                 1431.7640            
     1438.4446                 1491.0158                 1507.6243            
     1515.6094                 1521.5974                 1524.4706            
     1528.1760                 3053.1838                 3060.1998            
     3067.3317                 3068.8177                 3086.1393            
     3097.8150                 3104.8050                 3119.8397            
     3134.9054                 3141.5828                 3161.2737            
Zero-point correction (Hartree): 0.159196

C5H11OO.ttpm
-------------------
E(UM052X/6-311G(d,p)) (Hartree): -347.50018909 
Electronic state : 2-A
Cartesian coordinates (Angs):
     O       3.101527      0.628745       0.149714
     O       2.182018     -0.094716      -0.411425
     C       0.966202     -0.108623       0.378414
     C      -0.042718     -0.959099      -0.362291
     C      -1.392345     -1.025615       0.373504
     C      -2.436086     -0.037103      -0.151417
     C      -2.018784      1.427399      -0.039864
     H       1.218543     -0.531126       1.350509
     H       0.650848      0.924885       0.501541
     H      -0.180748     -0.556814      -1.368476
     H       0.381189     -1.957123      -0.474289
     H      -1.797122     -2.033868       0.284557
     H      -1.237692     -0.851781       1.443214
     H      -2.648875     -0.273932      -1.196981
     H      -3.366858     -0.189214       0.398162
     H      -1.160476      1.648574      -0.675348
     H      -1.754963      1.680237       0.989075
     H      -2.829818      2.086173      -0.348349
Rotational constants (GHz):    5.4442700    1.1512800    1.0187900
Vibrational harmonic frequencies (cm-1):
       61.8351                  100.1344                  122.0152            
      132.0608                  205.3287                  283.6304            
      317.0384                  362.5286                  478.2335            
      515.6246                  765.5723                  791.2406            
      851.6541                  895.2970                  986.6929            
     1022.5774                 1035.4835                 1057.3539            
     1122.6720                 1150.8483                 1182.3167            
     1239.9468                 1270.8443                 1284.1029            
     1320.0606                 1329.3611                 1352.0797            
     1394.8463                 1402.6814                 1432.4890            
     1435.5885                 1511.4869                 1516.3253            
     1519.4925                 1527.5523                 1532.2565            
     1539.8488                 3056.2536                 3068.5553            
     3071.9311                 3085.9424                 3098.2735            
     3103.4144                 3118.5206                 3132.3270            
     3140.8307                 3143.7112                 3164.3131            
Zero-point correction (Hartree): 0.160003

C5H11OO.ttpp
-------------------
E(UM052X/6-311G(d,p)) (Hartree): -347.50271848 
Electronic state : 2-A
Cartesian coordinates (Angs):
     O      -3.079027     -0.664315       0.272337
     O      -2.211609      0.049006      -0.377522
     C      -0.940443      0.097416       0.317347
     C       0.031389      0.837179      -0.573966
     C       1.357799      1.113279       0.138667
     C       2.073202     -0.138266       0.656438
     C       2.361269     -1.163218      -0.438490
     H      -1.107040      0.615060       1.262537
     H      -0.647237     -0.932443       0.512261
     H       0.195028      0.259510      -1.484422
     H      -0.426248      1.781579      -0.872012
     H       2.018775      1.636319      -0.555866
     H       1.177410      1.795168       0.973421
     H       3.013143      0.171173       1.116497
     H       1.486730     -0.604187       1.452129
     H       2.898703     -0.699777      -1.267999
     H       1.444442     -1.597778      -0.838149
     H       2.972094     -1.980492      -0.056892
Rotational constants (GHz):    5.4389000    1.1331900    1.0472100
Vibrational harmonic frequencies (cm-1):
       58.2735                   89.5861                  115.3574            
      156.2164                  207.6462                  287.7140            
      303.6175                  386.7362                  492.2411            
      526.3051                  739.5435                  811.5764            
      861.3031                  879.3717                  985.1745            
     1013.5210                 1021.7730                 1052.6549            
     1125.6387                 1160.6186                 1174.5768            
     1236.6873                 1274.2857                 1285.0124            
     1318.1594                 1332.4043                 1356.4523            
     1397.4890                 1406.1415                 1436.2651            
     1442.9751                 1502.3394                 1517.5878            
     1521.5379                 1524.8850                 1531.0398            
     1544.8708                 3059.4349                 3065.8244            
     3074.0164                 3082.9266                 3093.4417            
     3096.0070                 3104.0154                 3123.3868            
     3139.3679                 3144.9797                 3161.0947            
Zero-point correction (Hartree): 0.159978

C5H11OO.ttpt
-------------------
E(UM052X/6-311G(d,p)) (Hartree): -347.50289579 
Electronic state : 2-A
Cartesian coordinates (Angs):
     O      -3.307924     -0.728020       0.104616
     O      -2.459078      0.208967      -0.186425
     C      -1.108274     -0.170386       0.178698
     C      -0.203931      0.982807      -0.195746
     C       1.229441      0.770990       0.293020
     C       1.918587     -0.449890      -0.316064
     C       3.391103     -0.525375       0.077469
     H      -1.105558     -0.363222       1.251706
     H      -0.881060     -1.088190      -0.359443
     H      -0.214553      1.109038      -1.280219
     H      -0.615591      1.893598       0.241684
     H       1.813667      1.661601       0.051285
     H       1.235121      0.682763       1.383588
     H       1.414704     -1.364643       0.003790
     H       1.827123     -0.405333      -1.404873
     H       3.498198     -0.580330       1.161946
     H       3.928167      0.359837      -0.266047
     H       3.874248     -1.401569      -0.353197
Rotational constants (GHz):    8.3345400    0.9127100    0.8583000
Vibrational harmonic frequencies (cm-1):
       44.0268                   84.4589                   87.1455            
      123.0006                  223.3805                  244.2860            
      275.6748                  311.3346                  514.2854            
      519.9951                  743.2799                  789.7646            
      870.6680                  882.6853                 1000.7774            
     1013.4334                 1021.3007                 1067.4477            
     1118.0805                 1164.2218                 1187.9280            
     1243.3644                 1277.3052                 1294.8093            
     1316.9674                 1338.0847                 1348.8015            
     1371.2075                 1422.8381                 1431.0441            
     1442.2333                 1506.3822                 1513.5446            
     1520.9652                 1522.0307                 1527.9047            
     1532.3983                 3056.4377                 3064.4314            
     3069.6229                 3081.0642                 3088.8447            
     3099.2248                 3114.6002                 3125.3196            
     3136.4520                 3145.7653                 3164.3727            
Zero-point correction (Hartree): 0.159570

C5H11OO.tttp
-------------------
E(UM052X/6-311G(d,p)) (Hartree): -347.50293059 
Electronic state : 2-A
Cartesian coordinates (Angs):
     O       3.513930     -0.136419       0.079424
     O       2.315089     -0.549329      -0.196092
     C       1.319822      0.434581       0.179296
     C      -0.033185     -0.107838      -0.217894
     C      -1.146014      0.856641       0.192129
     C      -2.524798      0.438613      -0.320524
     C      -2.985817     -0.912607       0.221966
     H       1.405675      0.586719       1.254967
     H       1.568127      1.358509      -0.341359
     H      -0.053387     -0.263865      -1.298960
     H      -0.171981     -1.080123       0.255901
     H      -1.174504      0.932129       1.283280
     H      -0.911874      1.855002      -0.186538
     H      -3.248644      1.205852      -0.040432
     H      -2.506081      0.409418      -1.412908
     H      -2.955295     -0.920202       1.313256
     H      -2.355908     -1.725973      -0.137349
     H      -4.008331     -1.127822      -0.086350
Rotational constants (GHz):    9.0262800    0.8887400    0.8438700
Vibrational harmonic frequencies (cm-1):
       69.4639                   86.3508                  118.8732            
      126.6490                  150.1449                  262.6074            
      289.0799                  379.3979                  429.0183            
      553.3188                  753.9170                  786.7581            
      860.3665                  898.4009                  993.4521            
     1005.5695                 1029.2816                 1086.6220            
     1115.5983                 1166.0922                 1184.2782            
     1235.3941                 1279.5789                 1291.4470            
     1311.7941                 1332.7165                 1343.2171            
     1394.8391                 1404.4067                 1436.6411            
     1440.9778                 1505.2676                 1510.3550            
     1522.1884                 1525.3385                 1534.0854            
     1535.9974                 3050.9855                 3061.0166            
     3071.0182                 3080.0525                 3087.6560            
     3097.3118                 3099.0423                 3131.8706            
     3138.2272                 3146.8642                 3160.0992            
Zero-point correction (Hartree): 0.159639

C5H11OO.tttt
-------------------
E(UM052X/6-311G(d,p)) (Hartree): -347.50355506 
Point group : CS
Electronic state : 2-A"
Cartesian coordinates (Angs):
     O      -3.538547      0.895507       0.000000
     O      -2.281602      1.216816       0.000000
     C      -1.437375      0.038701       0.000000
     C       0.000000      0.503595       0.000000
     C       0.961758     -0.682877       0.000000
     C       2.424647     -0.248337       0.000000
     C       3.378188     -1.439673       0.000000
     H      -1.688186     -0.537059       0.890178
     H      -1.688186     -0.537059      -0.890178
     H       0.174586      1.125982      -0.879819
     H       0.174586      1.125982       0.879819
     H       0.771878     -1.308471       0.877353
     H       0.771878     -1.308471      -0.877353
     H       2.612894      0.376656      -0.876366
     H       2.612894      0.376656       0.876366
     H       3.218369     -2.062157      -0.881630
     H       3.218369     -2.062157       0.881630
     H       4.418808     -1.116930       0.000000
Rotational constants (GHz):   14.8111500    0.7716900    0.7505200
Vibrational harmonic frequencies (cm-1):
       57.5515 (  A")            63.2871 (  A")           104.2324 (  A')     
      110.4405 (  A")           141.2410 (  A")           220.1680 (  A")     
      269.4180 (  A')           317.8402 (  A')           448.0604 (  A')     
      550.4221 (  A')           734.1675 (  A")           769.2852 (  A")     
      855.6414 (  A")           911.2396 (  A')           984.5904 (  A")     
     1010.6861 (  A')          1051.4044 (  A')          1089.9752 (  A')     
     1092.7608 (  A')          1169.3375 (  A')          1188.6054 (  A")     
     1242.5638 (  A")          1274.4644 (  A')          1282.8704 (  A')     
     1304.6423 (  A")          1329.2330 (  A")          1344.4262 (  A")     
     1358.8992 (  A')          1415.7964 (  A')          1425.9204 (  A')     
     1439.7054 (  A')          1504.4484 (  A')          1507.5478 (  A')     
     1517.1342 (  A")          1517.7477 (  A')          1524.9954 (  A')     
     1531.5744 (  A')          3045.1096 (  A')          3059.4988 (  A')     
     3064.7627 (  A')          3071.9847 (  A')          3072.6625 (  A")     
     3095.6256 (  A")          3115.6546 (  A")          3115.7645 (  A')     
     3128.6703 (  A")          3146.9579 (  A')          3174.5472 (  A")     
Zero-point correction (Hartree): 0.158910

C5H11OO.1-6Hshift.a.m
-------------------
E(CCSD(T)/Aug-CC-pVDZ) (Hartree): -346.58484144 
E(CCSD/Aug-CC-pVDZ) (Hartree): -346.54027865 
     T1 diagnostic:  0.017791 
E(MP2/Aug-CC-pVDZ) (Hartree): -346.46323558 
E(MP3/Aug-CC-pVDZ) (Hartree): -346.52239398 
E(PMP2/Aug-CC-pVDZ) (Hartree): -346.47030962 
E(PMP3/Aug-CC-pVDZ) (Hartree): -346.52638143 
E(PUHF/Aug-CC-pVDZ) (Hartree): -345.33715195 
E(UHF/Aug-CC-pVDZ) (Hartree): -345.32693269 
E(UM052X/6-311G(d,p)) (Hartree): -347.46520256 
Electronic state : 2-A
Cartesian coordinates (Angs):
     O      -0.487593     -1.575654       0.307395
     H       0.473786     -0.986681      -0.092608
     C       1.258919      0.015912      -0.414236
     O      -1.529207     -0.975885      -0.382434
     C       0.577401      1.178112       0.268230
     C      -1.831285      0.272404       0.239066
     C      -0.875429      1.382271      -0.177022
     H       1.141259      0.015076      -1.497878
     C       2.637995     -0.334533       0.076153
     H       0.611731      1.023841       1.350823
     H       1.147672      2.091443       0.063724
     H      -2.843409      0.500834      -0.093338
     H      -1.827423      0.123984       1.320567
     H      -1.252067      2.316096       0.246958
     H      -0.914420      1.483233      -1.264431
     H       2.635737     -0.499717       1.154251
     H       3.331780      0.487494      -0.130152
     H       3.024149     -1.228288      -0.410747
Rotational constants (GHz):    3.9023600    1.9530200    1.4263500
Vibrational harmonic frequencies (cm-1):
    i1827.7714                   96.8039                  158.3423            
      212.5883                  228.7275                  270.1643            
      324.9172                  379.0516                  475.8100            
      530.2083                  607.7526                  782.3803            
      815.4792                  882.1827                  907.1384            
      940.2217                  993.8614                 1011.3970            
     1067.1461                 1105.4927                 1129.0006            
     1136.6725                 1181.0466                 1234.4804            
     1259.9269                 1281.5728                 1330.1606            
     1340.9967                 1400.6213                 1417.0805            
     1424.9615                 1426.9823                 1487.5258            
     1491.2963                 1497.2815                 1501.9365            
     1509.2405                 1514.6124                 3036.1150            
     3044.2519                 3069.7419                 3080.4833            
     3082.8970                 3112.3942                 3117.1299            
     3126.0646                 3142.2910                 3153.4192            
Zero-point correction (Hartree): 0.153366

C5H11OO.1-6Hshift.a.p
-------------------
E(UM052X/6-311G(d,p)) (Hartree): -347.46562495 
Electronic state : 2-A
Cartesian coordinates (Angs):
     O      -0.746363     -1.445851       0.694516
     H       0.372367     -1.016638       0.721954
     C       1.365773     -0.175512       0.538509
     O      -1.267375     -0.900564      -0.467926
     C       0.675953      1.164805       0.681003
     C      -1.630157      0.459062      -0.216445
     C      -0.447957      1.410225      -0.334755
     C       1.906543     -0.541585      -0.819496
     H       2.029328     -0.406681       1.369222
     H       0.272455      1.251869       1.692466
     H       1.425810      1.956682       0.571449
     H      -2.378919      0.686224      -0.974766
     H      -2.088080      0.505881       0.772924
     H      -0.827695      2.425247      -0.196568
     H      -0.054090      1.357107      -1.351177
     H       2.567107      0.248255      -1.193707
     H       1.096908     -0.669327      -1.538608
     H       2.473783     -1.469264      -0.778800
Rotational constants (GHz):    3.2888000    2.3427200    1.7919700
Vibrational harmonic frequencies (cm-1):
    i1796.1102                  120.1030                  138.0703            
      197.3772                  274.2026                  321.3220            
      334.2989                  424.7880                  494.8645            
      551.3019                  593.4242                  802.1095            
      835.2428                  874.2708                  910.4071            
      926.9578                  986.6514                 1030.6157            
     1052.5696                 1081.2905                 1127.5290            
     1139.2705                 1170.7387                 1196.3648            
     1257.1601                 1276.5044                 1333.0138            
     1371.3742                 1391.6017                 1411.1303            
     1424.0613                 1432.1556                 1487.4569            
     1493.1539                 1499.5964                 1504.9290            
     1519.3281                 1530.7990                 3041.5479            
     3047.0936                 3078.1141                 3082.5176            
     3097.7060                 3118.6249                 3124.3504            
     3140.5388                 3144.8918                 3165.1119            
Zero-point correction (Hartree): 0.153905

C5H11OO.1-6Hshift.b.m
-------------------
E(UM052X/6-311G(d,p)) (Hartree): -347.46475270 
Electronic state : 2-A
Cartesian coordinates (Angs):
     O       0.497280     -1.478881       0.602577
     H      -0.492210     -0.790503       0.655388
     C      -1.317360      0.213830       0.465233
     O       1.079949     -1.028041      -0.569676
     C      -0.437325      1.236649      -0.224078
     C       1.845008      0.140122      -0.272597
     C       0.987517      1.242038       0.349177
     H      -1.557105      0.479717       1.494826
     C      -2.464054     -0.343931      -0.332806
     H      -0.403267      1.024471      -1.294854
     H      -0.890909      2.225587      -0.106726
     H       2.682595     -0.130856       0.371572
     H       2.220196      0.444524      -1.249702
     H       1.476462      2.198887       0.163756
     H       0.937083      1.108480       1.430389
     H      -2.094402     -0.804561      -1.249899
     H      -3.155398      0.456525      -0.617345
     H      -3.023600     -1.089149       0.229813
Rotational constants (GHz):    3.7772500    2.0888600    1.5812500
Vibrational harmonic frequencies (cm-1):
    i1783.8856                   71.0933                  155.4450            
      201.2553                  256.0418                  307.8824            
      362.1913                  391.6904                  445.3002            
      568.5327                  614.4451                  791.4513            
      844.5481                  888.4029                  901.7368            
      925.6489                  999.1791                 1038.3329            
     1067.5516                 1100.3902                 1126.1216            
     1159.5880                 1188.2295                 1199.8993            
     1260.9015                 1269.5490                 1316.2980            
     1333.4133                 1391.0406                 1411.7927            
     1417.4401                 1429.1074                 1495.6111            
     1502.8847                 1505.4417                 1508.7069            
     1518.1410                 1524.0232                 3040.2423            
     3062.3464                 3085.7344                 3091.9853            
     3104.6708                 3112.1963                 3128.1869            
     3131.6270                 3149.2836                 3156.6451            
Zero-point correction (Hartree): 0.153895

C5H11OO.1-6Hshift.b.p
-------------------
E(UM052X/6-311G(d,p)) (Hartree): -347.46351541 
Electronic state : 2-A
Cartesian coordinates (Angs):
     O      -0.656944     -1.520408      -0.271285
     H       0.389578     -1.083461       0.130839
     C       1.302921     -0.236658       0.555156
     O      -1.560383     -0.754763       0.447063
     C       0.524787      1.064342       0.642083
     C      -1.778234      0.468298      -0.255610
     C      -0.475704      1.223759      -0.514495
     C       2.411849     -0.288617      -0.464822
     H       1.569150     -0.666034       1.518499
     H      -0.007650      1.119386       1.591721
     H       1.238565      1.894393       0.621336
     H      -2.310712      0.262522      -1.185458
     H      -2.427197      1.027865       0.418289
     H      -0.719577      2.275953      -0.664918
     H      -0.023755      0.865299      -1.438709
     H       3.226281      0.378856      -0.164777
     H       2.068362      0.032877      -1.448180
     H       2.821858     -1.293036      -0.558737
Rotational constants (GHz):    3.9384700    2.0197000    1.6008200
Vibrational harmonic frequencies (cm-1):
    i1817.8123                  109.0051                  158.9211            
      203.2757                  242.6117                  294.8863            
      317.9934                  409.9105                  442.9135            
      596.2949                  626.4804                  780.2101            
      809.4930                  869.6258                  896.8753            
      924.0561                  995.3005                 1045.3187            
     1053.7587                 1071.3835                 1136.2397            
     1145.1784                 1175.3387                 1209.6192            
     1265.1854                 1282.9716                 1316.1969            
     1359.8602                 1375.4141                 1407.9760            
     1416.3619                 1429.1156                 1491.5767            
     1500.1968                 1504.4791                 1512.0332            
     1517.8851                 1520.8544                 3042.4562            
     3048.5419                 3079.9670                 3095.9929            
     3114.3057                 3122.3147                 3128.4260            
     3133.3564                 3147.4176                 3161.3991            
Zero-point correction (Hartree): 0.153751

#################################################################################
1-pentylperoxy (M06-2X/aug-cc-pVTZ geometry)
#################################################################################

C5H11OO.1-5Hshift.dm
--------------------
E(UM062X/Aug-CC-pVTZ) (Hartree): -347.40254802 
Electronic state : 2-A
Cartesian coordinates (Angs):
     C      -0.525786     -0.194137       0.519669
     C       0.122228      1.071359       0.018547
     C       1.650979      0.979194       0.114240
     O       2.067466     -0.189012      -0.560615
     O       1.668539     -1.275590       0.202770
     C      -1.720895     -0.712839      -0.234755
     H      -0.624631     -0.239429       1.604703
     H      -0.207097      1.943817       0.590657
     H      -0.144631      1.236106      -1.027008
     H       1.982754      0.935419       1.153904
     H       2.136377      1.808538      -0.397681
     H       0.501211     -1.034944       0.346418
     C      -2.925541      0.223748      -0.095814
     H      -1.460229     -0.817195      -1.290316
     H      -1.988080     -1.705404       0.128953
     H      -2.694943      1.214901      -0.487372
     H      -3.209600      0.334148       0.951148
     H      -3.785071     -0.163092      -0.641974
Rotational constants (GHz):    5.4100100    1.4321400    1.2360500
Vibrational harmonic frequencies (cm-1):
    i1840.3483                   70.8511                  104.1195            
      164.6086                  242.7838                  289.2275            
      393.1610                  399.0793                  482.9484            
      520.1791                  601.1835                  778.8224            
      824.2802                  873.1431                  912.9332            
      959.8429                  993.2674                 1002.0129            
     1032.8336                 1087.8876                 1116.3524            
     1147.8662                 1173.6105                 1188.0968            
     1221.5962                 1264.9883                 1299.4090            
     1326.8226                 1347.8237                 1380.3469            
     1393.5109                 1405.7599                 1469.4457            
     1485.5780                 1492.0584                 1501.3032            
     1508.9308                 1579.0956                 3044.0310            
     3058.6836                 3062.2447                 3065.8037            
     3092.3416                 3100.9111                 3112.5204            
     3132.5877                 3136.1100                 3140.5266            
Zero-point correction (Hartree): 0.152595

C5H11OO.1-5Hshift.dp
--------------------
E(UM062X/Aug-CC-pVTZ) (Hartree): -347.40241588 
Electronic state : 2-A
Cartesian coordinates (Angs):
     C      -0.527093      0.664224       0.746336
     C       0.371773      1.281150      -0.297721
     C       1.740728      0.583935      -0.341594
     O       1.529237     -0.808167      -0.443956
     O       1.045087     -1.242473       0.780427
     C      -1.942805      0.318741       0.352204
     H      -0.423380      1.108772       1.734500
     H       0.535561      2.342332      -0.092076
     H      -0.082731      1.199234      -1.284897
     H       2.323557      0.794404       0.557313
     H       2.306709      0.867399      -1.227550
     H       0.116791     -0.491961       0.928644
     C      -2.026364     -0.766266      -0.719365
     H      -2.494928      0.000518       1.236757
     H      -2.437509      1.228851      -0.009339
     H      -1.573131     -1.690443      -0.361549
     H      -1.499949     -0.476430      -1.628337
     H      -3.063010     -0.968260      -0.984393
Rotational constants (GHz):    3.8928000    1.8648300    1.5992400
Vibrational harmonic frequencies (cm-1):
    i1824.3060                   55.0340                   83.3627            
      165.1856                  252.0757                  302.3303            
      380.1344                  450.9787                  481.3515            
      519.6518                  613.3749                  764.0343            
      803.6035                  872.8014                  904.0306            
      948.8976                  989.2452                 1004.6152            
     1042.2544                 1110.1558                 1116.7834            
     1128.1057                 1166.5531                 1180.8967            
     1223.1334                 1269.6148                 1292.0463            
     1324.4112                 1359.5118                 1374.5619            
     1386.7529                 1420.6123                 1473.0726            
     1480.2648                 1487.3062                 1504.8088            
     1506.2923                 1577.8513                 3011.3432            
     3053.7423                 3068.3956                 3069.6439            
     3095.6299                 3111.3884                 3125.3828            
     3138.7735                 3142.0377                 3143.3594            
Zero-point correction (Hartree): 0.152581

C5H11OO.1-5Hshift.dt
--------------------
E(UM062X/Aug-CC-pVTZ) (Hartree): -347.40296929 
Electronic state : 2-A
Cartesian coordinates (Angs):
     C       0.525789     -0.454527       0.441943
     C      -0.647449     -1.295386       0.009477
     C      -1.964991     -0.520543       0.156600
     O      -1.834345      0.709443      -0.524440
     O      -0.964274      1.500722       0.209823
     C       1.765717     -0.474168      -0.409965
     H       0.717373     -0.468532       1.515441
     H      -0.718978     -2.212573       0.600904
     H      -0.535028     -1.578867      -1.037845
     H      -2.200096     -0.329869       1.205844
     H      -2.792532     -1.041220      -0.322534
     H      -0.025597      0.756624       0.323121
     C       2.822418      0.517093       0.058639
     H       2.180885     -1.489957      -0.405906
     H       1.486021     -0.267714      -1.445978
     H       3.122665      0.307224       1.085830
     H       2.433185      1.535015       0.025308
     H       3.712154      0.473735      -0.567413
Rotational constants (GHz):    4.6442400    1.5505100    1.2737100
Vibrational harmonic frequencies (cm-1):
    i1822.0987                   64.8749                   90.6480            
      144.4022                  243.4896                  301.3131            
      380.5368                  409.0095                  478.0645            
      502.4950                  602.2916                  754.0382            
      821.1408                  883.0599                  909.3346            
      952.3817                  987.6775                 1006.0461            
     1065.5207                 1110.7018                 1121.5302            
     1139.2725                 1171.9619                 1191.7668            
     1224.0600                 1265.9314                 1294.7366            
     1306.8864                 1354.3140                 1379.3215            
     1405.4533                 1416.4325                 1472.4540            
     1478.3512                 1486.9850                 1503.3166            
     1506.7745                 1578.6289                 3010.9873            
     3048.5574                 3062.3184                 3068.2165            
     3070.6449                 3096.4055                 3111.6804            
     3129.6136                 3140.8494                 3141.0343            
Zero-point correction (Hartree): 0.152376

C5H11OO.1-5Hshift.um
--------------------
E(UM062X/Aug-CC-pVTZ) (Hartree): -347.40234943 
Electronic state : 2-A
Cartesian coordinates (Angs):
     C      -0.534515      0.451138      -0.936697
     C       0.292569      1.331267      -0.028745
     C       1.283655      0.510435       0.819597
     O       1.988116     -0.366622      -0.031631
     O       1.095917     -1.340488      -0.451397
     C      -1.911717      0.035638      -0.479844
     H      -0.485226      0.725796      -1.987575
     H      -0.349064      1.898418       0.652833
     H       0.870058      2.042276      -0.616926
     H       0.768807     -0.068510       1.587531
     H       2.036717      1.150115       1.277132
     H       0.224003     -0.650983      -0.909823
     C      -1.954066     -0.577627       0.916701
     H      -2.561101      0.919648      -0.504845
     H      -2.331476     -0.665838      -1.202289
     H      -1.616298      0.131728       1.673441
     H      -1.314588     -1.458191       0.972924
     H      -2.969650     -0.872676       1.175755
Rotational constants (GHz):    3.9750200    1.8138500    1.6670800
Vibrational harmonic frequencies (cm-1):
    i1833.9843                  111.7205                  124.9164            
      183.9447                  266.4888                  295.3608            
      372.3340                  435.8744                  499.9872            
      519.9560                  662.5908                  767.5381            
      802.8910                  845.4774                  894.1749            
      930.9487                  983.9245                 1009.0324            
     1047.7226                 1092.4411                 1125.5829            
     1140.3305                 1146.2610                 1186.7413            
     1231.3229                 1279.6332                 1296.1340            
     1339.2689                 1354.8520                 1371.9852            
     1391.7077                 1418.9004                 1471.6582            
     1481.7968                 1487.5005                 1506.4259            
     1512.9691                 1581.5929                 3012.9644            
     3045.4538                 3063.5559                 3080.4957            
     3087.7797                 3117.5222                 3130.7625            
     3135.7942                 3142.2689                 3146.4416            
Zero-point correction (Hartree): 0.152945

C5H11OO.1-5Hshift.up
--------------------
E(UM062X/Aug-CC-pVTZ) (Hartree): -347.40255549 
Electronic state : 2-A
Cartesian coordinates (Angs):
     C       0.525454     -0.176762       0.673767
     C      -0.184743      1.121679       0.387158
     C      -1.394468      0.886422      -0.532972
     O      -2.220302     -0.094522       0.055138
     O      -1.549576     -1.304508      -0.023552
     C       1.567004     -0.626477      -0.319512
     H       0.799753     -0.334312       1.714970
     H       0.483924      1.832223      -0.110046
     H      -0.542089      1.582405       1.306427
     H      -1.081419      0.549903      -1.523798
     H      -2.009023      1.780714      -0.621557
     H      -0.502509     -1.011535       0.489194
     C       2.887510      0.129601      -0.150583
     H       1.749367     -1.696078      -0.204693
     H       1.185404     -0.482589      -1.333222
     H       3.302557     -0.038564       0.843340
     H       2.746501      1.203352      -0.276010
     H       3.622021     -0.200057      -0.884447
Rotational constants (GHz):    5.2938400    1.4894900    1.3018800
Vibrational harmonic frequencies (cm-1):
    i1842.4749                   82.0527                  121.7993            
      156.2709                  236.5663                  282.8926            
      370.2364                  416.6889                  485.8821            
      546.0514                  667.2778                  768.6106            
      817.8844                  854.8936                  898.6794            
      940.5527                  986.2716                 1003.1521            
     1034.4366                 1073.5795                 1119.9468            
     1132.1250                 1173.9137                 1182.3589            
     1234.4179                 1269.5364                 1295.1615            
     1329.1620                 1353.9843                 1376.1699            
     1396.3335                 1408.5479                 1470.1162            
     1484.7135                 1491.4571                 1503.0216            
     1508.7349                 1578.1912                 3040.1300            
     3059.0738                 3062.0675                 3068.5094            
     3095.2451                 3118.3264                 3129.7611            
     3134.3810                 3135.3437                 3143.5841            
Zero-point correction (Hartree): 0.152724

C5H11OO.1-5Hshift.ut
--------------------
E(CCSD(T)/Aug-CC-pVTZ) (Hartree): -346.89537069 
E(CCSD/Aug-CC-pVTZ) (Hartree): -346.83242138 
     T1 diagnostic:  0.018978 
E(MP2/Aug-CC-pVTZ) (Hartree): -346.77453726 
E(MP3/Aug-CC-pVTZ) (Hartree): -346.82157523 
E(PMP2/Aug-CC-pVTZ) (Hartree): -346.78185162 
E(PMP3/Aug-CC-pVTZ) (Hartree): -346.82569591 
E(PUHF/Aug-CC-pVTZ) (Hartree): -345.41667325 
E(UHF/Aug-CC-pVTZ) (Hartree): -345.40618707 
E(UM062X/Aug-CC-pVTZ) (Hartree): -347.40373026 
Electronic state : 2-A
Cartesian coordinates (Angs):
     C      -0.514175      0.524861      -0.629721
     C       0.725014      1.310088      -0.289702
     C       1.682653      0.466200       0.567673
     O       1.947124     -0.741859      -0.111765
     O       0.783704     -1.494942      -0.092761
     C      -1.622001      0.504730       0.389513
     H      -0.850870      0.603232      -1.661700
     H       0.468926      2.212629       0.275512
     H       1.253871      1.613580      -1.191631
     H       1.250523      0.244625       1.546008
     H       2.647080      0.956128       0.690449
     H       0.001361     -0.708376      -0.558752
     C      -2.685238     -0.542187       0.082704
     H      -1.195451      0.323112       1.379591
     H      -2.079216      1.500394       0.431976
     H      -2.249438     -1.541657       0.088254
     H      -3.121361     -0.372560      -0.902451
     H      -3.489564     -0.518848       0.816155
Rotational constants (GHz):    4.4069000    1.6903900    1.3743300
Vibrational harmonic frequencies (cm-1):
    i1831.6262                   80.8663                  132.1127            
      140.6109                  249.3976                  298.0139            
      348.1599                  423.3031                  506.4999            
      526.8880                  647.1325                  747.9089            
      830.5890                  850.8073                  898.0776            
      945.9749                  983.7227                 1035.0811            
     1050.1346                 1084.1155                 1116.3148            
     1127.9274                 1176.0459                 1189.1424            
     1241.0067                 1271.9539                 1290.7211            
     1315.1650                 1348.2953                 1379.0519            
     1405.8985                 1415.6585                 1469.8296            
     1476.8058                 1487.1881                 1503.7723            
     1507.4616                 1574.4385                 3019.4046            
     3036.9492                 3061.2138                 3066.8301            
     3071.5700                 3116.3208                 3127.8581            
     3130.2381                 3140.7381                 3143.6684            
Zero-point correction (Hartree): 0.152616

C5H11OO.1-6Hshift.a.m
---------------------
E(CCSD(T)/Aug-CC-pVTZ) (Hartree): -346.89623618 
E(CCSD/Aug-CC-pVTZ) (Hartree): -346.83389835 
     T1 diagnostic:  0.017118 
E(MP2/Aug-CC-pVTZ) (Hartree): -346.77562079 
E(MP3/Aug-CC-pVTZ) (Hartree): -346.82363149 
E(PMP2/Aug-CC-pVTZ) (Hartree): -346.78293379 
E(PMP3/Aug-CC-pVTZ) (Hartree): -346.82773006 
E(PUHF/Aug-CC-pVTZ) (Hartree): -345.42021330 
E(UHF/Aug-CC-pVTZ) (Hartree): -345.40967442 
E(UM062X/Aug-CC-pVTZ) (Hartree): -347.40516173 
Electronic state : 2-A
Cartesian coordinates (Angs):
     O      -0.495377     -1.583076       0.290302
     H       0.462515     -0.982676      -0.101221
     C       1.263791      0.016419      -0.415077
     O      -1.545516     -0.970513      -0.371309
     C       0.585846      1.182707       0.258400
     C      -1.822975      0.279368       0.247446
     C      -0.866741      1.382913      -0.179307
     H       1.154389      0.014173      -1.500209
     C       2.632979     -0.346069       0.084510
     H       0.626118      1.038565       1.342507
     H       1.156026      2.095002       0.048465
     H      -2.837826      0.517199      -0.072498
     H      -1.814242      0.138906       1.330986
     H      -1.242910      2.318847       0.239465
     H      -0.912320      1.480247      -1.266783
     H       2.620487     -0.523099       1.160703
     H       3.334312      0.474547      -0.101676
     H       3.023188     -1.235024      -0.407505
Rotational constants (GHz):    3.8927800    1.9533800    1.4231700
Vibrational harmonic frequencies (cm-1):
    i1921.7085                  102.3488                  154.4748            
      202.5034                  221.0683                  273.0098            
      328.5568                  380.3394                  473.4672            
      528.7374                  604.3971                  774.3654            
      809.2123                  874.6596                  900.2629            
      934.5977                  991.0127                 1001.8729            
     1062.7237                 1096.5954                 1122.5755            
     1131.8022                 1170.8691                 1220.5933            
     1246.8616                 1263.9927                 1316.4648            
     1328.4861                 1385.8162                 1400.7110            
     1407.9581                 1408.4121                 1471.1123            
     1475.5429                 1480.8072                 1485.1408            
     1487.9396                 1494.9995                 3020.2375            
     3030.3572                 3053.9154                 3061.6878            
     3066.1850                 3096.1597                 3100.5730            
     3106.2976                 3122.4498                 3143.4983            
Zero-point correction (Hartree): 0.152217

C5H11OO.1-6Hshift.a.p
---------------------
E(UM062X/Aug-CC-pVTZ) (Hartree): -347.40518270 
Electronic state : 2-A
Cartesian coordinates (Angs):
     O      -0.758768     -1.454092       0.676511
     H       0.354386     -1.014621       0.709820
     C       1.364924     -0.182144       0.539865
     O      -1.297353     -0.887624      -0.465361
     C       0.689653      1.163952       0.672696
     C      -1.628667      0.472714      -0.203454
     C      -0.437006      1.407697      -0.336750
     C       1.921733     -0.551544      -0.807474
     H       2.011848     -0.424913       1.380715
     H       0.293691      1.267324       1.685595
     H       1.444800      1.949224       0.551672
     H      -2.384993      0.716847      -0.949988
     H      -2.077360      0.530340       0.790669
     H      -0.806300      2.427876      -0.212031
     H      -0.050257      1.338866      -1.355374
     H       2.591377      0.233797      -1.175146
     H       1.124562     -0.672996      -1.542149
     H       2.483394     -1.482065      -0.762280
Rotational constants (GHz):    3.3022500    2.3267300    1.7749100
Vibrational harmonic frequencies (cm-1):
    i1911.6919                  117.6225                  141.2678            
      188.5807                  268.7141                  323.0096            
      335.7141                  422.7653                  490.6606            
      550.0902                  588.5838                  794.5135            
      827.1912                  867.1711                  903.9479            
      921.1206                  982.9670                 1021.2283            
     1047.7535                 1075.2612                 1112.9793            
     1134.3758                 1159.8540                 1179.5563            
     1243.7787                 1261.0391                 1320.2747            
     1356.6365                 1374.4565                 1395.8223            
     1408.2837                 1414.1593                 1470.4177            
     1476.7689                 1481.7855                 1486.9227            
     1491.8839                 1507.0542                 3022.4577            
     3028.6382                 3063.4908                 3065.1977            
     3080.5565                 3101.5716                 3107.1438            
     3120.0981                 3123.1663                 3148.5049            
Zero-point correction (Hartree): 0.152649

C5H11OO.1-6Hshift.b.m
---------------------
E(UM062X/Aug-CC-pVTZ) (Hartree): -347.40419080 
Electronic state : 2-A
Cartesian coordinates (Angs):
     O       0.509430     -1.487214       0.588152
     H      -0.481280     -0.807039       0.638295
     C      -1.319938      0.198333       0.459651
     O       1.109640     -1.022218      -0.567997
     C      -0.449613      1.228873      -0.223867
     C       1.846992      0.155574      -0.261000
     C       0.972912      1.251084       0.347349
     H      -1.545072      0.449959       1.496668
     C      -2.477325     -0.346492      -0.325906
     H      -0.414231      1.022593      -1.296090
     H      -0.913326      2.213496      -0.107952
     H       2.683928     -0.098771       0.392259
     H       2.233067      0.464345      -1.233359
     H       1.453347      2.210661       0.155219
     H       0.924708      1.130383       1.430358
     H      -2.126894     -0.797927      -1.255152
     H      -3.170659      0.458345      -0.593518
     H      -3.034315     -1.094813       0.234675
Rotational constants (GHz):    3.7851100    2.0743700    1.5687600
Vibrational harmonic frequencies (cm-1):
    i1916.0350                   78.4083                  151.6336            
      197.6447                  255.6998                  302.9115            
      358.5700                  386.0234                  445.5895            
      560.0980                  613.3233                  784.9160            
      832.8175                  880.8307                  895.2470            
      918.5686                  994.2716                 1034.9792            
     1062.1176                 1090.0489                 1121.7847            
     1142.9843                 1164.3567                 1181.4240            
     1242.1431                 1259.5602                 1304.2825            
     1320.4792                 1376.6195                 1395.8788
[truncated: 22,218,408 more chars]
