# Supplementary material for: H migration in peroxy radicals under atmospheric conditions
Source: Copernicus journal article supplement (doi:10.5194/acp-20-7429-2020), 2020-06-26
Supplement: Supplementary file 1 [file acp-20-7429-2020-supplement.zip › SARderivation.ods]

## Sheet: Plot Aliphatic
Aliphatic RO2
1,4 Hshift
	P1	1.26E+12	560000000000	5.67E+13		1.00E-02
	P2	16930	0.2	1.88E+04		4.007										Ea shift
	P3		34.2	5.26E+08		12964										-1.12E+03
-CH2OO. | -CH3	T	Miyoshi 2011	Sharma et al. 2010	Otkjaer et al. 2018 (incorrect)	Otkjaer et al. 2018	Zhang and Dibble 2011								T-dependence	Target	Final		1000/T	1/T	log(1/T)	log(-CH2OO. | -CH3)	log(T)	Replicate
	200	2.17E-25	1.71E-26			1.17E-21								1.63E-24		4.34E-22		5.00	5.00E-03	-2.30E+00	-2.14E+01	A	3.97E-22
	225	2.64E-21	2.49E-22			2.53E-18								1.18E-20		1.69E-18		4.44	4.44E-03	-2.35E+00	-1.78E+01	1.48E+11	0.92
	250	4.90E-18	5.34E-19			1.23E-15								1.47E-17		1.28E-15		4.00	4.00E-03	-2.40E+00	-1.49E+01	Ea
	260	6.62E-17	7.60E-18			1.05E-14								1.74E-16		1.28E-14		3.85	3.85E-03	-2.41E+00	-1.39E+01	1.50E+04
	270	7.39E-16	8.90E-17			7.77E-14								1.72E-15		1.08E-13		3.70	3.70E-03	-2.43E+00	-1.30E+01		1.03
	280	6.94E-15	8.73E-16			4.99E-13								1.45E-14		7.79E-13		3.57	3.57E-03	-2.45E+00	-1.21E+01		8.03E-13
	290	5.58E-14	7.32E-15	9.24E-06		2.84E-12								1.05E-13		4.93E-12		3.45	3.45E-03	-2.46E+00	-1.13E+01	-1.40E+00
	298	2.67E-13	3.62E-14	9.71E-06	3.72E-11	1.05E-11								4.67E-13	1.98E-11	1.98E-11		3.36	3.36E-03	-2.47E+00	-1.07E+01	-6.33E+03
	310	2.41E-12	3.42E-13	1.21E-05		6.63E-11								3.79E-12		1.39E-10		3.23	3.23E-03	-2.49E+00	-9.86E+00	7.08E+00
	320	1.33E-11	1.95E-12	1.62E-05		2.78E-10								1.93E-11		6.32E-10		3.13	3.13E-03	-2.51E+00	-9.20E+00	#N/A
	330	6.60E-11	1.00E-11			1.07E-09								8.92E-11		2.63E-09		3.03	3.03E-03	-2.52E+00	-8.58E+00	#N/A
	340	2.99E-10	4.67E-11			3.84E-09								3.77E-10		1.00E-08		2.94	2.94E-03	-2.53E+00	-8.00E+00	A	1.00E-08
	350	1.24E-09	1.99E-10			1.28E-08								1.47E-09		3.56E-08		2.86	2.86E-03	-2.54E+00	-7.45E+00	1.21E+07	1.00
	375	3.11E-08	5.37E-09			2.00E-07								3.22E-08		6.32E-07		2.67	2.67E-03	-2.57E+00	-6.20E+00	n
	400	5.23E-07	9.57E-08			2.25E-06								4.83E-07		7.86E-06		2.50	2.50E-03	-2.60E+00	-5.10E+00	1.40
	425	6.31E-06	1.22E-06			1.93E-05								5.29E-06		7.31E-05		2.35	2.35E-03	-2.63E+00	-4.14E+00	Ea	1.00
	450	5.77E-05	1.17E-05			1.32E-04								4.46E-05		5.33E-04		2.22	2.22E-03	-2.65E+00	-3.27E+00	14586	5.33E-04
	P1	1.02E+12	400000000000	4.77E+12	6.53E+12	4.67E+12
	P2	15130	1.1	1.68E+04	1.70E+04	1.69E+04										Ea shift
	P3		30.1	2.21E+08	2.28E+08	2.23E+08										-1.59E+03
-CH2OO. | -CH2-	T	Miyoshi 2011	Sharma et al. 2010	Otkjaer et al. 2018	Otkjaer et al. 2018	Otkjaer et al. 2018								T-dependence	Target	Final		1000/T	1/T	log(1/T)	log(-CH2OO. | -CH2-)	log(T)	Replicate
	200	1.43E-21	8.68E-23											3.52E-22		9.90E-19		5.00	5.00E-03	-2.30E+00	-1.80E+01	A	9.56E-19
	225	6.38E-18	4.47E-19											1.69E-18		1.96E-15		4.44	4.44E-03	-2.35E+00	-1.47E+01	5.73E+11	0.97
	250	5.31E-15	4.21E-16											1.50E-15		8.59E-13		4.00	4.00E-03	-2.40E+00	-1.21E+01	Ea
	260	5.45E-14	4.52E-15											1.57E-14		7.06E-12		3.85	3.85E-03	-2.41E+00	-1.12E+01	1.37E+04
	270	4.70E-13	4.08E-14											1.38E-13		4.97E-11		3.70	3.70E-03	-2.43E+00	-1.03E+01		1.01
	280	3.48E-12	3.15E-13											1.05E-12		3.04E-10		3.57	3.57E-03	-2.45E+00	-9.52E+00		3.08E-10
	290	2.24E-11	2.11E-12	2.85E-09	2.61E-09	2.14E-09								6.88E-12		1.65E-09		3.45	3.45E-03	-2.46E+00	-8.78E+00	-5.50E-01
	298	9.09E-11	8.85E-12	6.63E-09	6.05E-09	5.01E-09								2.84E-11	5.86E-09	5.86E-09		3.36	3.36E-03	-2.47E+00	-8.23E+00	-5.89E+03
	310	6.49E-10	6.61E-11	2.31E-08	2.10E-08	1.75E-08								2.07E-10		3.48E-08		3.23	3.23E-03	-2.49E+00	-7.46E+00	1.02E+01
	320	2.98E-09	3.15E-10	6.41E-08	5.82E-08	4.88E-08								9.70E-10		1.39E-07		3.13	3.13E-03	-2.51E+00	-6.86E+00	#N/A
	330	1.25E-08	1.37E-09											4.14E-09		5.09E-07		3.03	3.03E-03	-2.52E+00	-6.29E+00	#N/A
	340	4.81E-08	5.46E-09											1.62E-08		1.73E-06		2.94	2.94E-03	-2.53E+00	-5.76E+00	A	1.73E-06
	350	1.72E-07	2.01E-08											5.88E-08		5.50E-06		2.86	2.86E-03	-2.54E+00	-5.26E+00	1.43E+10	1.00
	375	3.06E-06	3.89E-07											1.09E-06		7.54E-05		2.67	2.67E-03	-2.57E+00	-4.12E+00	n
	400	3.81E-05	5.21E-06											1.41E-05		7.48E-04		2.50	2.50E-03	-2.60E+00	-3.13E+00	0.55
	425	3.53E-04	5.17E-05											1.35E-04		5.67E-03		2.35	2.35E-03	-2.63E+00	-2.25E+00	Ea	1.00
	450	2.55E-03	3.99E-04											1.01E-03		3.44E-02		2.22	2.22E-03	-2.65E+00	-1.46E+00	13551	3.44E-02
	P1	6.95E+11	580000000000	1.94E+12
	P2	13660	0.8	1.54E+04												Ea shift
	P3		27.1	2.05E+08												-1.03E+03
-CH2OO. | >CH-	T	Miyoshi 2011	Sharma et al. 2010	Otkjaer et al. 2018										T-dependence	Target	Final		1000/T	1/T	log(1/T)	log(-CH2OO. | >CH-)	log(T)	Replicate
	200	1.51E-18	3.88E-19											7.66E-19		1.35E-16		5.00	5.00E-03	-2.30E+00	-1.59E+01	A	1.32E-16
	225	2.99E-15	8.32E-16											1.58E-15		1.57E-13		4.44	4.44E-03	-2.35E+00	-1.28E+01	5.86E+11	0.98
	250	1.29E-12	3.88E-13											7.09E-13		4.45E-11		4.00	4.00E-03	-2.40E+00	-1.04E+01	Ea
	260	1.06E-11	3.27E-12											5.88E-12		3.15E-10		3.85	3.85E-03	-2.41E+00	-9.50E+00	1.27E+04
	270	7.41E-11	2.35E-11											4.17E-11		1.93E-09		3.70	3.70E-03	-2.43E+00	-8.71E+00		1.01
	280	4.51E-10	1.47E-10											2.57E-10		1.04E-08		3.57	3.57E-03	-2.45E+00	-7.98E+00		1.05E-08
	290	2.43E-09	8.10E-10	7.51E-08										1.40E-09		4.97E-08		3.45	3.45E-03	-2.46E+00	-7.30E+00	-4.00E-01
	298	8.60E-09	2.93E-09	1.62E-07										5.02E-09	1.62E-07	1.62E-07		3.36	3.36E-03	-2.47E+00	-6.79E+00	-5.48E+03
	310	5.07E-08	1.78E-08	5.03E-07										3.00E-08		8.46E-07		3.23	3.23E-03	-2.49E+00	-6.07E+00	1.06E+01
	320	2.01E-07	7.20E-08	1.27E-06										1.20E-07		3.05E-06		3.13	3.13E-03	-2.51E+00	-5.52E+00	#N/A
	330	7.33E-07	2.69E-07											4.44E-07		1.02E-05		3.03	3.03E-03	-2.52E+00	-4.99E+00	#N/A
	340	2.47E-06	9.28E-07											1.52E-06		3.18E-05		2.94	2.94E-03	-2.53E+00	-4.50E+00	A	3.18E-05
	350	7.80E-06	2.99E-06											4.83E-06		9.29E-05		2.86	2.86E-03	-2.54E+00	-4.03E+00	4.01E+10	1.00
	375	1.05E-04	4.24E-05											6.68E-05		1.06E-03		2.67	2.67E-03	-2.57E+00	-2.98E+00	n
	400	1.03E-03	4.34E-04											6.67E-04		8.86E-03		2.50	2.50E-03	-2.60E+00	-2.05E+00	0.40
	425	7.64E-03	3.38E-03											5.08E-03		5.81E-02		2.35	2.35E-03	-2.63E+00	-1.24E+00	Ea	1.00
	450	4.56E-02	2.11E-02											3.10E-02		3.09E-01		2.22	2.22E-03	-2.65E+00	-5.10E-01	12614	3.09E-01
	P1	1.54E+12	9.70E+11
	P2	16720.0	1.1													Ea shift
	P3		33.5													0.00E+00
>CHOO. | -CH3	T	Miyoshi 2011	Sharma et al. 2010											T-dependence	Target	Final		1000/T	1/T	log(1/T)	log(>CHOO. | -CH3)	log(T)	Replicate
	200	7.59E-25	4.05E-26											1.75E-25		1.75E-25		5.00	5.00E-03	-2.30E+00	-2.48E+01	A	1.70E-25
	225	8.22E-21	5.39E-22											2.10E-21		2.10E-21		4.44	4.44E-03	-2.35E+00	-2.07E+01	1.10E+12	0.97
	250	1.39E-17	1.09E-18											3.88E-18		3.88E-18		4.00	4.00E-03	-2.40E+00	-1.74E+01	Ea
	260	1.82E-16	1.52E-17											5.25E-17		5.25E-17		3.85	3.85E-03	-2.41E+00	-1.63E+01	1.70E+04
	270	1.97E-15	1.75E-16											5.86E-16		5.86E-16		3.70	3.70E-03	-2.43E+00	-1.52E+01		1.01
	280	1.79E-14	1.69E-15											5.51E-15		5.51E-15		3.57	3.57E-03	-2.45E+00	-1.43E+01		5.58E-15
	290	1.41E-13	1.40E-14											4.44E-14		4.44E-14		3.45	3.45E-03	-2.46E+00	-1.34E+01	-5.50E-01
	298	6.61E-13	6.88E-14											2.13E-13	2.13E-13	2.13E-13		3.36	3.36E-03	-2.47E+00	-1.27E+01	-7.29E+03
	310	5.80E-12	6.42E-13											1.93E-12		1.93E-12		3.23	3.23E-03	-2.49E+00	-1.17E+01	1.04E+01
	320	3.13E-11	3.64E-12											1.07E-11		1.07E-11		3.13	3.13E-03	-2.51E+00	-1.10E+01	#N/A
	330	1.52E-10	1.86E-11											5.32E-11		5.32E-11		3.03	3.03E-03	-2.52E+00	-1.03E+01	#N/A
	340	6.77E-10	8.63E-11											2.42E-10		2.42E-10		2.94	2.94E-03	-2.53E+00	-9.62E+00	A	2.42E-10
	350	2.76E-09	3.67E-10											1.01E-09		1.01E-09		2.86	2.86E-03	-2.54E+00	-9.00E+00	2.74E+10	1.00
	375	6.66E-08	9.84E-09											2.56E-08		2.56E-08		2.67	2.67E-03	-2.57E+00	-7.59E+00	n
	400	1.08E-06	1.75E-07											4.36E-07		4.36E-07		2.50	2.50E-03	-2.60E+00	-6.36E+00	0.55
	425	1.26E-05	2.24E-06											5.32E-06		5.32E-06		2.35	2.35E-03	-2.63E+00	-5.27E+00	Ea	1.00
	450	1.12E-04	2.16E-05											4.93E-05		4.93E-05		2.22	2.22E-03	-2.65E+00	-4.31E+00	16790	4.93E-05
	P1	8.50E+11	430000000000
	P2	15310	0.9													Ea shift
	P3		29.5													0.00E+00
>CHOO. | -CH2-	T	Miyoshi 2011	Sharma et al. 2010											T-dependence	Target	Final		1000/T	1/T	log(1/T)	log(>CHOO. | -CH2-)	log(T)	Replicate
	200	4.83E-22	5.83E-22											5.31E-22		5.31E-22		5.00	5.00E-03	-2.30E+00	-2.13E+01	A	5.16E-22
	225	2.39E-18	2.48E-18											2.43E-18		2.43E-18		4.44	4.44E-03	-2.35E+00	-1.76E+01	5.53E+11	0.97
	250	2.15E-15	2.00E-15											2.07E-15		2.07E-15		4.00	4.00E-03	-2.40E+00	-1.47E+01	Ea
	260	2.27E-14	2.03E-14											2.15E-14		2.15E-14		3.85	3.85E-03	-2.41E+00	-1.37E+01	1.52E+04
	270	2.01E-13	1.74E-13											1.87E-13		1.87E-13		3.70	3.70E-03	-2.43E+00	-1.27E+01		1.01
	280	1.52E-12	1.28E-12											1.40E-12		1.40E-12		3.57	3.57E-03	-2.45E+00	-1.19E+01		1.41E-12
	290	1.00E-11	8.24E-12											9.10E-12		9.10E-12		3.45	3.45E-03	-2.46E+00	-1.10E+01	-4.50E-01
	298	4.14E-11	3.34E-11											3.72E-11	3.72E-11	3.72E-11		3.36	3.36E-03	-2.47E+00	-1.04E+01	-6.55E+03
	310	3.03E-10	2.38E-10											2.68E-10		2.68E-10		3.23	3.23E-03	-2.49E+00	-9.57E+00	1.04E+01
	320	1.42E-09	1.09E-09											1.24E-09		1.24E-09		3.13	3.13E-03	-2.51E+00	-8.90E+00	#N/A
	330	6.04E-09	4.59E-09											5.26E-09		5.26E-09		3.03	3.03E-03	-2.52E+00	-8.28E+00	#N/A
	340	2.36E-08	1.77E-08											2.04E-08		2.04E-08		2.94	2.94E-03	-2.53E+00	-7.69E+00	A	2.04E-08
	350	8.55E-08	6.32E-08											7.35E-08		7.35E-08		2.86	2.86E-03	-2.54E+00	-7.13E+00	2.70E+10	1.00
	375	1.58E-06	1.14E-06											1.34E-06		1.34E-06		2.67	2.67E-03	-2.57E+00	-5.87E+00	n
	400	2.03E-05	1.43E-05											1.70E-05		1.70E-05		2.50	2.50E-03	-2.60E+00	-4.77E+00	0.45
	425	1.93E-04	1.34E-04											1.61E-04		1.61E-04		2.35	2.35E-03	-2.63E+00	-3.79E+00	Ea	1.00
	450	1.42E-03	9.84E-04											1.18E-03		1.18E-03		2.22	2.22E-03	-2.65E+00	-2.93E+00	15078	1.18E-03
	P1	5.41E+11	470000000000
	P2	13690	0.6													Ea shift
	P3		27.3													0.00E+00
>CHOO. | >CH-	T	Miyoshi 2011	Sharma et al. 2010											T-dependence	Target	Final		1000/T	1/T	log(1/T)	log(>CHOO. | >CH-)	log(T)	Replicate
	200	1.01E-18	2.62E-19											5.15E-19		5.15E-19		5.00	5.00E-03	-2.30E+00	-1.83E+01	A	5.06E-19
	225	2.04E-15	5.81E-16											1.09E-15		1.09E-15		4.44	4.44E-03	-2.35E+00	-1.50E+01	4.75E+11	0.98
	250	8.94E-13	2.77E-13											4.98E-13		4.98E-13		4.00	4.00E-03	-2.40E+00	-1.23E+01	Ea
	260	7.34E-12	2.35E-12											4.16E-12		4.16E-12		3.85	3.85E-03	-2.41E+00	-1.14E+01	1.38E+04
	270	5.16E-11	1.70E-11											2.97E-11		2.97E-11		3.70	3.70E-03	-2.43E+00	-1.05E+01		1.01
	280	3.16E-10	1.07E-10											1.84E-10		1.84E-10		3.57	3.57E-03	-2.45E+00	-9.74E+00		1.85E-10
	290	1.70E-09	5.94E-10											1.01E-09		1.01E-09		3.45	3.45E-03	-2.46E+00	-9.00E+00	-3.00E-01
	298	6.05E-09	2.16E-09											3.61E-09	3.61E-09	3.61E-09		3.36	3.36E-03	-2.47E+00	-8.44E+00	-5.96E+03
	310	3.58E-08	1.31E-08											2.17E-08		2.17E-08		3.23	3.23E-03	-2.49E+00	-7.66E+00	1.08E+01
	320	1.42E-07	5.35E-08											8.73E-08		8.73E-08		3.13	3.13E-03	-2.51E+00	-7.06E+00	#N/A
	330	5.21E-07	2.00E-07											3.23E-07		3.23E-07		3.03	3.03E-03	-2.52E+00	-6.49E+00	#N/A
	340	1.76E-06	6.94E-07											1.11E-06		1.11E-06		2.94	2.94E-03	-2.53E+00	-5.96E+00	A	1.11E-06
	350	5.57E-06	2.24E-06											3.53E-06		3.53E-06		2.86	2.86E-03	-2.54E+00	-5.45E+00	6.35E+10	1.00
	375	7.56E-05	3.20E-05											4.92E-05		4.92E-05		2.67	2.67E-03	-2.57E+00	-4.31E+00	n
	400	7.40E-04	3.28E-04											4.93E-04		4.93E-04		2.50	2.50E-03	-2.60E+00	-3.31E+00	0.30
	425	5.54E-03	2.57E-03											3.77E-03		3.77E-03		2.35	2.35E-03	-2.63E+00	-2.42E+00	Ea	1.00
	450	3.32E-02	1.60E-02											2.30E-02		2.30E-02		2.22	2.22E-03	-2.65E+00	-1.64E+00	13715	2.30E-02
	P1	1.80E+12	2000000000000
	P2	16810	1.2													Ea shift
	P3		33.5													0.00E+00
>C(OO.)- | -CH3	T	Miyoshi 2011	Sharma et al. 2010											T-dependence	Target	Final		1000/T	1/T	log(1/T)	log(>C(OO.)- | -CH3)	log(T)	Replicate
	200	5.66E-25	7.11E-26											2.01E-25		2.01E-25		5.00	5.00E-03	-2.30E+00	-2.47E+01	A	1.93E-25
	225	6.44E-21	9.58E-22											2.48E-21		2.48E-21		4.44	4.44E-03	-2.35E+00	-2.06E+01	1.68E+12	0.96
	250	1.13E-17	1.95E-18											4.70E-18		4.70E-18		4.00	4.00E-03	-2.40E+00	-1.73E+01	Ea
	260	1.50E-16	2.74E-17											6.41E-17		6.41E-17		3.85	3.85E-03	-2.41E+00	-1.62E+01	1.70E+04
	270	1.65E-15	3.16E-16											7.21E-16		7.21E-16		3.70	3.70E-03	-2.43E+00	-1.51E+01		1.01
	280	1.52E-14	3.07E-15											6.84E-15		6.84E-15		3.57	3.57E-03	-2.45E+00	-1.42E+01		6.93E-15
	290	1.21E-13	2.56E-14											5.55E-14		5.55E-14		3.45	3.45E-03	-2.46E+00	-1.33E+01	-6.00E-01
	298	5.71E-13	1.26E-13											2.68E-13	2.68E-13	2.68E-13		3.36	3.36E-03	-2.47E+00	-1.26E+01	-7.31E+03
	310	5.07E-12	1.18E-12											2.44E-12		2.44E-12		3.23	3.23E-03	-2.49E+00	-1.16E+01	1.05E+01
	320	2.76E-11	6.70E-12											1.36E-11		1.36E-11		3.13	3.13E-03	-2.51E+00	-1.09E+01	#N/A
	330	1.36E-10	3.43E-11											6.82E-11		6.82E-11		3.03	3.03E-03	-2.52E+00	-1.02E+01	#N/A
	340	6.07E-10	1.60E-10											3.11E-10		3.11E-10		2.94	2.94E-03	-2.53E+00	-9.51E+00	A	3.11E-10
	350	2.49E-09	6.82E-10											1.30E-09		1.30E-09		2.86	2.86E-03	-2.54E+00	-8.88E+00	3.01E+10	1.00
	375	6.13E-08	1.84E-08											3.36E-08		3.36E-08		2.67	2.67E-03	-2.57E+00	-7.47E+00	n
	400	1.01E-06	3.30E-07											5.77E-07		5.77E-07		2.50	2.50E-03	-2.60E+00	-6.24E+00	0.60
	425	1.20E-05	4.23E-06											7.12E-06		7.12E-06		2.35	2.35E-03	-2.63E+00	-5.15E+00	Ea	1.00
	450	1.08E-04	4.11E-05											6.65E-05		6.65E-05		2.22	2.22E-03	-2.65E+00	-4.18E+00	16835	6.65E-05
	P1	1.44E+12	410000000000
	P2	14510	0.7													Ea shift
	P3		30.1													0.00E+00
>C(OO.)- | -CH2-	T	Miyoshi 2011	Sharma et al. 2010											T-dependence	Target	Final		1000/T	1/T	log(1/T)	log(>C(OO.)- | -CH2-)	log(T)	Replicate
	200	4.47E-20	1.69E-22											2.75E-21		2.75E-21		5.00	5.00E-03	-2.30E+00	-2.06E+01	A	2.69E-21
	225	1.42E-16	8.31E-19											1.09E-17		1.09E-17		4.44	4.44E-03	-2.35E+00	-1.70E+01	7.17E+11	0.98
	250	8.95E-14	7.51E-16											8.20E-15		8.20E-15		4.00	4.00E-03	-2.40E+00	-1.41E+01	Ea
	260	8.34E-13	7.94E-15											8.14E-14		8.14E-14		3.85	3.85E-03	-2.41E+00	-1.31E+01	1.49E+04
	270	6.59E-12	7.05E-14											6.82E-13		6.82E-13		3.70	3.70E-03	-2.43E+00	-1.22E+01		1.01
	280	4.49E-11	5.37E-13											4.91E-12		4.91E-12		3.57	3.57E-03	-2.45E+00	-1.13E+01		4.95E-12
	290	2.68E-10	3.55E-12											3.09E-11		3.09E-11		3.45	3.45E-03	-2.46E+00	-1.05E+01	-3.50E-01
	298	1.03E-09	1.47E-11											1.23E-10	1.23E-10	1.23E-10		3.36	3.36E-03	-2.47E+00	-9.91E+00	-6.44E+03
	310	6.77E-09	1.08E-10											8.56E-10		8.56E-10		3.23	3.23E-03	-2.49E+00	-9.07E+00	1.08E+01
	320	2.92E-08	5.10E-10											3.86E-09		3.86E-09		3.13	3.13E-03	-2.51E+00	-8.41E+00	#N/A
	330	1.15E-07	2.19E-09											1.59E-08		1.59E-08		3.03	3.03E-03	-2.52E+00	-7.80E+00	#N/A
	340	4.21E-07	8.61E-09											6.02E-08		6.02E-08		2.94	2.94E-03	-2.53E+00	-7.22E+00	A	6.02E-08
	350	1.42E-06	3.14E-08											2.11E-07		2.11E-07		2.86	2.86E-03	-2.54E+00	-6.67E+00	6.85E+10	1.00
	375	2.26E-05	5.90E-07											3.65E-06		3.65E-06		2.67	2.67E-03	-2.57E+00	-5.44E+00	n
	400	2.54E-04	7.71E-06											4.42E-05		4.42E-05		2.50	2.50E-03	-2.60E+00	-4.35E+00	0.35
	425	2.14E-03	7.46E-05											4.00E-04		4.00E-04		2.35	2.35E-03	-2.63E+00	-3.40E+00	Ea	1.00
	450	1.43E-02	5.63E-04											2.83E-03		2.83E-03		2.22	2.22E-03	-2.65E+00	-2.55E+00	14829	2.83E-03
	P1	9.76E+11	550000000000
	P2	12980	0.4													Ea shift
	P3		26.4													0.00E+00
>C(OO.)- | >CH-	T	Miyoshi 2011	Sharma et al. 2010											T-dependence	Target	Final		1000/T	1/T	log(1/T)	log(>C(OO.)- | >CH-)	log(T)	Replicate
	200	6.36E-17	4.07E-18											1.61E-17		1.61E-17		5.00	5.00E-03	-2.30E+00	-1.68E+01	A	1.59E-17
	225	8.62E-14	6.85E-15											2.43E-14		2.43E-14		4.44	4.44E-03	-2.35E+00	-1.36E+01	7.04E+11	0.99
	250	2.76E-11	2.62E-12											8.51E-12		8.51E-12		4.00	4.00E-03	-2.40E+00	-1.11E+01	Ea
	260	2.03E-10	2.06E-11											6.47E-11		6.47E-11		3.85	3.85E-03	-2.41E+00	-1.02E+01	1.32E+04
	270	1.29E-09	1.39E-10											4.23E-10		4.23E-10		3.70	3.70E-03	-2.43E+00	-9.37E+00		1.00
	280	7.19E-09	8.15E-10											2.42E-09		2.42E-09		3.57	3.57E-03	-2.45E+00	-8.62E+00		2.43E-09
	290	3.56E-08	4.25E-09											1.23E-08		1.23E-08		3.45	3.45E-03	-2.46E+00	-7.91E+00	-2.00E-01
	298	1.18E-07	1.47E-08											4.17E-08	4.17E-08	4.17E-08		3.36	3.36E-03	-2.47E+00	-7.38E+00	-5.70E+03
	310	6.38E-07	8.38E-08											2.31E-07		2.31E-07		3.23	3.23E-03	-2.49E+00	-6.64E+00	1.13E+01
	320	2.36E-06	3.24E-07											8.75E-07		8.75E-07		3.13	3.13E-03	-2.51E+00	-6.06E+00	#N/A
	330	8.08E-06	1.15E-06											3.05E-06		3.05E-06		3.03	3.03E-03	-2.52E+00	-5.52E+00	#N/A
	340	2.57E-05	3.82E-06											9.90E-06		9.90E-06		2.94	2.94E-03	-2.53E+00	-5.00E+00	A	9.90E-06
	350	7.64E-05	1.18E-05											3.00E-05		3.00E-05		2.86	2.86E-03	-2.54E+00	-4.52E+00	1.84E+11	1.00
	375	9.06E-04	1.52E-04											3.71E-04		3.71E-04		2.67	2.67E-03	-2.57E+00	-3.43E+00	n
	400	7.88E-03	1.43E-03											3.36E-03		3.36E-03		2.50	2.50E-03	-2.60E+00	-2.47E+00	0.20
	425	5.32E-02	1.03E-02											2.35E-02		2.35E-02		2.35	2.35E-03	-2.63E+00	-1.63E+00	Ea	1.00
	450	2.90E-01	6.01E-02											1.32E-01		1.32E-01		2.22	2.22E-03	-2.65E+00	-8.79E-01	13133	1.32E-01
1,5 Hshift
	Average Temperature dependence															1.45E+02
	T	-CH2OO. | -CH3	-CH2OO. | -CH2-	-CH2OO. | >CH-	>CHOO. | -CH3	>CHOO. | -CH2-	>CHOO. | >CH-	>C(OO.)- | >CH-						T-dependence	Target	Final		1000/T	1/T	log(1/T)	log()	log(T)	Replicate
	200	4.82E-12	1.36E-09	1.26E-07	2.29E-11	3.73E-09	5.39E-06	6.25E-10						2.18E-09		1.06E-09		5.00	5.00E-03	-2.30E+00	-8.97E+00	A	5.39E-10
	225	4.59E-10	9.63E-08	8.09E-06	2.38E-09	2.23E-07	1.12E-04	5.72E-08						1.43E-07		7.51E-08		4.44	4.44E-03	-2.35E+00	-7.12E+00	2.11E+09	0.51
	250	2.05E-08	3.25E-06	2.37E-04	1.12E-07	6.66E-06	1.50E-03	2.34E-06						4.57E-06		2.56E-06		4.00	4.00E-03	-2.40E+00	-5.59E+00	Ea
	260	7.93E-08	1.13E-05	7.74E-04	4.41E-07	2.23E-05	3.84E-03	8.66E-06						1.56E-05		8.95E-06		3.85	3.85E-03	-2.41E+00	-5.05E+00	8.56E+03
	270	2.83E-07	3.62E-05	2.33E-03	1.59E-06	6.92E-05	9.37E-03	2.95E-05						4.95E-05		2.90E-05		3.70	3.70E-03	-2.43E+00	-4.54E+00		1.27
	280	9.41E-07	1.08E-04	6.50E-03	5.34E-06	2.01E-04	2.19E-02	9.28E-05						1.47E-04		8.74E-05		3.57	3.57E-03	-2.45E+00	-4.06E+00		1.11E-04
	290	2.93E-06	3.05E-04	1.70E-02	1.67E-05	5.51E-04	4.90E-02	2.73E-04						4.08E-04		2.48E-04		3.45	3.45E-03	-2.46E+00	-3.61E+00	-1.08E+01
	298	6.95E-06	6.68E-04	3.52E-02	3.99E-05	1.19E-03	9.11E-02	6.20E-04						8.88E-04	5.47E-04	5.47E-04		3.36	3.36E-03	-2.47E+00	-3.26E+00	-2.34E+03
	310	2.38E-05	2.03E-03	9.81E-02	1.37E-04	3.54E-03	2.21E-01	1.98E-03						2.69E-03		1.68E-03		3.23	3.23E-03	-2.49E+00	-2.77E+00	-2.21E+01
	320	6.29E-05	4.88E-03	2.19E-01	3.62E-04	8.35E-03	4.49E-01	4.92E-03						6.42E-03		4.08E-03		3.13	3.13E-03	-2.51E+00	-2.39E+00	#N/A
	330	1.59E-04	1.12E-02	4.66E-01	9.13E-04	1.89E-02	8.84E-01	1.17E-02						1.47E-02		9.47E-03		3.03	3.03E-03	-2.52E+00	-2.02E+00	#N/A
	340	3.84E-04	2.47E-02	9.53E-01	2.21E-03	4.12E-02	1.69E+00	2.65E-02						3.23E-02		2.11E-02		2.94	2.94E-03	-2.53E+00	-1.68E+00	A	2.11E-02
	350	8.94E-04	5.25E-02	1.88E+00	5.12E-03	8.68E-02	3.17E+00	5.78E-02						6.86E-02		4.54E-02		2.86	2.86E-03	-2.54E+00	-1.34E+00	7.45E-23	1.00
	375	6.35E-03	3.00E-01	8.87E+00	3.59E-02	4.87E-01	1.38E+01	3.49E-01						3.92E-01		2.66E-01		2.67	2.67E-03	-2.57E+00	-5.74E-01	n
	400	3.74E-02	1.43E+00	3.52E+01	2.08E-01	2.31E+00	5.30E+01	1.75E+00						1.88E+00		1.31E+00		2.50	2.50E-03	-2.60E+00	1.18E-01	10.79
	425	1.88E-01	5.91E+00	1.20E+02	1.03E+00	9.50E+00	1.84E+02	7.47E+00						7.83E+00		5.57E+00		2.35	2.35E-03	-2.63E+00	7.46E-01	Ea	1.00
	450	8.29E-01	2.15E+01	3.65E+02	4.42E+00	3.46E+01	5.85E+02	2.79E+01						2.88E+01		2.09E+01		2.22	2.22E-03	-2.65E+00	1.32E+00	5382	2.09E+01
	P1	307000000000	245000000000	3.87E+11	6.20E-34	1.63824628690528E-31	1.80E+06
	P2	11560	1.36666666666667	1.27E+04	1.43E+01	13.5503066231724	1.729									Ea shift
	P3		21.3666666666667	8.36E+07	5108.24812232782	5380.74425382971	10167									-5.00E+01
-CH2OO. | -CH3	T	Miyoshi 2011	Sharma et al. 2010	Otkjaer et al. 2018	Vereecken 2019	Vereecken 2019	Zhang and Dibble 2011							T-dependence	Target	Final		1000/T	1/T	log(1/T)	log(-CH2OO. | -CH3)	log(T)	Replicate
	200	2.43E-14	1.21E-13		4.54E-12	5.13E-12	1.43E-12							4.82E-12		6.19E-12		5.00	5.00E-03	-2.30E+00	-1.12E+01	A	2.59E-12
	225	1.49E-11	5.60E-11		4.19E-10	5.03E-10	4.98E-10							4.59E-10		5.73E-10		4.44	4.44E-03	-2.35E+00	-9.24E+00	4.08E+08	0.42
	250	2.54E-09	7.69E-09		1.83E-08	2.29E-08	5.48E-08							2.05E-08		2.50E-08		4.00	4.00E-03	-2.40E+00	-7.60E+00	Ea
	260	1.51E-08	4.24E-08		7.06E-08	8.92E-08	2.80E-07							7.93E-08		9.62E-08		3.85	3.85E-03	-2.41E+00	-7.02E+00	9.30E+03
	270	7.81E-08	2.07E-07		2.51E-07	3.20E-07	1.27E-06							2.83E-07		3.41E-07		3.70	3.70E-03	-2.43E+00	-6.47E+00		1.36
	280	3.61E-07	9.01E-07		8.30E-07	1.07E-06	5.20E-06							9.41E-07		1.13E-06		3.57	3.57E-03	-2.45E+00	-5.95E+00		1.53E-06
	290	1.50E-06	3.55E-06	1.14E-06	2.57E-06	3.33E-06	1.93E-05							2.93E-06		3.48E-06		3.45	3.45E-03	-2.46E+00	-5.46E+00	-1.39E+01
	298	4.37E-06	9.98E-06	2.83E-06	6.10E-06	7.93E-06	5.19E-05							6.95E-06	8.22E-06	8.22E-06		3.36	3.36E-03	-2.47E+00	-5.08E+00	-2.26E+03
	310	1.96E-05	4.26E-05	1.03E-05	2.08E-05	2.72E-05	2.08E-04							2.38E-05		2.80E-05		3.23	3.23E-03	-2.49E+00	-4.55E+00	-3.20E+01
	320	6.28E-05	1.31E-04	2.88E-05	5.50E-05	7.20E-05	6.13E-04							6.29E-05		7.36E-05		3.13	3.13E-03	-2.51E+00	-4.13E+00	#N/A
	330	1.88E-04	3.80E-04		1.39E-04	1.82E-04	1.69E-03							1.59E-04		1.85E-04		3.03	3.03E-03	-2.52E+00	-3.73E+00	#N/A
	340	5.26E-04	1.03E-03		3.35E-04	4.40E-04	4.41E-03							3.84E-04		4.45E-04		2.94	2.94E-03	-2.53E+00	-3.35E+00	A	4.45E-04
	350	1.39E-03	2.65E-03		7.80E-04	1.02E-03	1.09E-02							8.94E-04		1.03E-03		2.86	2.86E-03	-2.54E+00	-2.99E+00	1.01E-32	1.00
	375	1.26E-02	2.26E-02		5.54E-03	7.27E-03	8.52E-02							6.35E-03		7.25E-03		2.67	2.67E-03	-2.57E+00	-2.14E+00	n
	400	8.63E-02	1.48E-01		3.27E-02	4.28E-02	5.19E-01							3.74E-02		4.24E-02		2.50	2.50E-03	-2.60E+00	-1.37E+00	13.94
	425	4.72E-01	7.81E-01		1.65E-01	2.15E-01	2.57E+00							1.88E-01		2.12E-01		2.35	2.35E-03	-2.63E+00	-6.74E-01	Ea	1.00
	450	2.14E+00	3.45E+00		7.31E-01	9.40E-01	1.07E+01							8.29E-01		9.26E-01		2.22	2.22E-03	-2.65E+00	-3.33E-02	5195	9.26E-01
	P1	224000000000	54000000000	5.34E+11	7.56E+11	4.14E+11	6.64E-22	1.69473765638329E-20	1.97E-19	6.89E-40	205.306284784063	4.62E+06	7.60E+06
	P2	9900	1.3	1.12E+04	1.14E+04	1.14E+04	1.04E+01	9.96049953726765	9.61E+00	1.62E+01	2.84868907106971	1.558	1.472			Ea shift
	P3		18.2	8.01E+07	8.15E+07	8.56E+07	5556.29201924762	5659.92250331609	5689.57292965947	2325.84102971706	8723.40574882679	8821	8756			-5.75E+01
-CH2OO. | -CH2-	T	Miyoshi 2011	Sharma et al. 2010	Otkjaer et al. 2018	Otkjaer et al. 2018	Otkjaer et al. 2018	Vereecken 2019	Vereecken 2019	Vereecken 2019	Vereecken 2019	Vereecken 2019	Zhang and Dibble 2011	Zhang and Dibble 2011	T-dependence	Target	Final		1000/T	1/T	log(1/T)	log(-CH2OO. | -CH2-)	log(T)	Replicate
	200	7.12E-11	8.59E-11				4.99E-10	7.21E-10	1.12E-09	1.37E-07	8.41E-11	1.24E-09	1.80E-09	1.36E-09		1.81E-09		5.00	5.00E-03	-2.30E+00	-8.74E+00	A	9.80E-10
	225	1.74E-08	1.62E-08				3.72E-08	5.41E-08	8.17E-08	3.37E-06	1.50E-08	2.01E-07	2.77E-07	9.63E-08		1.24E-07		4.44	4.44E-03	-2.35E+00	-6.91E+00	1.93E+09	0.54
	250	1.42E-06	1.09E-06				1.32E-06	1.91E-06	2.82E-06	5.23E-05	9.76E-07	1.19E-05	1.58E-05	3.25E-06		4.09E-06		4.00	4.00E-03	-2.40E+00	-5.39E+00	Ea
	260	6.51E-06	4.70E-06				4.65E-06	6.75E-06	9.86E-06	1.42E-04	4.17E-06	4.93E-05	6.45E-05	1.13E-05		1.41E-05		3.85	3.85E-03	-2.41E+00	-4.85E+00	8.42E+03
	270	2.67E-05	1.82E-05				1.52E-05	2.20E-05	3.19E-05	3.64E-04	1.61E-05	1.84E-04	2.38E-04	3.62E-05		4.48E-05		3.70	3.70E-03	-2.43E+00	-4.35E+00		1.24
	280	9.88E-05	6.41E-05				4.63E-05	6.69E-05	9.60E-05	8.93E-04	5.66E-05	6.24E-04	7.98E-04	1.08E-04		1.33E-04		3.57	3.57E-03	-2.45E+00	-3.88E+00		1.65E-04
	290	3.34E-04	2.07E-04	2.41E-04	1.81E-04	1.17E-04	1.32E-04	1.90E-04	2.71E-04	2.10E-03	1.83E-04	1.95E-03	2.47E-03	3.05E-04		3.71E-04		3.45	3.45E-03	-2.46E+00	-3.43E+00	-9.81E+00
	298	8.36E-04	5.01E-04	5.24E-04	4.00E-04	2.56E-04	2.93E-04	4.22E-04	5.96E-04	4.05E-03	4.44E-04	4.61E-03	5.78E-03	6.68E-04	8.10E-04	8.10E-04		3.36	3.36E-03	-2.47E+00	-3.09E+00	-2.40E+03
	310	3.03E-03	1.73E-03	1.60E-03	1.25E-03	7.84E-04	9.11E-04	1.30E-03	1.82E-03	1.04E-02	1.54E-03	1.54E-02	1.91E-02	2.03E-03		2.45E-03		3.23	3.23E-03	-2.49E+00	-2.61E+00	-1.93E+01
	320	8.21E-03	4.55E-03	3.88E-03	3.07E-03	1.90E-03	2.22E-03	3.16E-03	4.39E-03	2.20E-02	4.07E-03	3.94E-02	4.84E-02	4.88E-03		5.84E-03		3.13	3.13E-03	-2.51E+00	-2.23E+00	#N/A
	330	2.10E-02	1.13E-02				5.17E-03	7.35E-03	1.01E-02	4.52E-02	1.02E-02	9.53E-02	1.16E-01	1.12E-02		1.33E-02		3.03	3.03E-03	-2.52E+00	-1.88E+00	#N/A
	340	5.07E-02	2.65E-02				1.16E-02	1.64E-02	2.24E-02	9.03E-02	2.40E-02	2.19E-01	2.65E-01	2.47E-02		2.93E-02		2.94	2.94E-03	-2.53E+00	-1.53E+00	A	2.93E-02
	350	1.16E-01	5.94E-02				2.50E-02	3.52E-02	4.77E-02	1.76E-01	5.44E-02	4.81E-01	5.77E-01	5.25E-02		6.19E-02		2.86	2.86E-03	-2.54E+00	-1.21E+00	5.00E-20	1.00
	375	7.67E-01	3.72E-01				1.47E-01	2.06E-01	2.73E-01	8.39E-01	3.49E-01	2.88E+00	3.38E+00	3.00E-01		3.50E-01		2.67	2.67E-03	-2.57E+00	-4.57E-01	n
	400	3.99E+00	1.86E+00				7.29E-01	1.00E+00	1.31E+00	3.52E+00	1.79E+00	1.38E+01	1.60E+01	1.43E+00		1.66E+00		2.50	2.50E-03	-2.60E+00	2.19E-01	9.81
	425	1.71E+01	7.75E+00				3.10E+00	4.22E+00	5.42E+00	1.33E+01	7.69E+00	5.56E+01	6.34E+01	5.91E+00		6.77E+00		2.35	2.35E-03	-2.63E+00	8.31E-01	Ea	1.00
	450	6.25E+01	2.77E+01				1.16E+01	1.56E+01	1.98E+01	4.55E+01	2.83E+01	1.93E+02	2.17E+02	2.15E+01		2.45E+01		2.22	2.22E-03	-2.65E+00	1.39E+00	5534	2.45E+01
	P1	131000000000	49000000000	2.34E+11	1.25E-02	0.000252313143753
	P2	8300	1.2	1.02E+04	4.02E+00	4.76310686919991										Ea shift
	P3		15.4	8.16E+07	6576.70824800215	6546.82489230779										1.40E+00
-CH2OO. | >CH-	T	Miyoshi 2011	Sharma et al. 2010	Otkjaer et al. 2018	Vereecken 2019	Vereecken 2019								T-dependence	Target	Final		1000/T	1/T	log(1/T)	log(-CH2OO. | >CH-)	log(T)	Replicate
	200	1.24E-07	1.05E-07		1.13E-07	1.40E-07								1.26E-07		1.25E-07		5.00	5.00E-03	-2.30E+00	-6.90E+00	A	9.50E-08
	225	1.25E-05	8.98E-06		7.03E-06	9.31E-06								8.09E-06		8.04E-06		4.44	4.44E-03	-2.35E+00	-5.09E+00	1.09E+10	0.76
	250	5.00E-04	3.19E-04		2.00E-04	2.82E-04								2.37E-04		2.36E-04		4.00	4.00E-03	-2.40E+00	-3.63E+00	Ea
	260	1.79E-03	1.10E-03		6.43E-04	9.31E-04								7.74E-04		7.70E-04		3.85	3.85E-03	-2.41E+00	-3.11E+00	7.86E+03
	270	5.84E-03	3.48E-03		1.91E-03	2.83E-03								2.33E-03		2.31E-03		3.70	3.70E-03	-2.43E+00	-2.64E+00		1.10
	280	1.75E-02	1.01E-02		5.27E-03	8.01E-03								6.50E-03		6.46E-03		3.57	3.57E-03	-2.45E+00	-2.19E+00		7.12E-03
	290	4.87E-02	2.74E-02	3.52E-03	1.36E-02	2.12E-02								1.70E-02		1.69E-02		3.45	3.45E-03	-2.46E+00	-1.77E+00	-4.39E+00
	298	1.05E-01	5.81E-02	6.97E-03	2.80E-02	4.42E-02								3.52E-02	3.50E-02	3.50E-02		3.36	3.36E-03	-2.47E+00	-1.46E+00	-2.85E+03
	310	3.09E-01	1.67E-01	1.86E-02	7.70E-02	1.25E-01								9.81E-02		9.77E-02		3.23	3.23E-03	-2.49E+00	-1.01E+00	-2.75E+00
	320	7.12E-01	3.78E-01	4.05E-02	1.70E-01	2.81E-01								2.19E-01		2.18E-01		3.13	3.13E-03	-2.51E+00	-6.62E-01	#N/A
	330	1.56E+00	8.18E-01		3.58E-01	6.05E-01								4.66E-01		4.64E-01		3.03	3.03E-03	-2.52E+00	-3.34E-01	#N/A
	340	3.28E+00	1.69E+00		7.26E-01	1.25E+00								9.53E-01		9.49E-01		2.94	2.94E-03	-2.53E+00	-2.29E-02	A	9.49E-01
	350	6.58E+00	3.36E+00		1.42E+00	2.49E+00								1.88E+00		1.87E+00		2.86	2.86E-03	-2.54E+00	2.72E-01	1.77E-03	1.00
	375	3.20E+01	1.60E+01		6.54E+00	1.20E+01								8.87E+00		8.84E+00		2.67	2.67E-03	-2.57E+00	9.46E-01	n
	400	1.28E+02	6.28E+01		2.54E+01	4.87E+01								3.52E+01		3.50E+01		2.50	2.50E-03	-2.60E+00	1.54E+00	4.39
	425	4.32E+02	2.11E+02		8.51E+01	1.70E+02								1.20E+02		1.20E+02		2.35	2.35E-03	-2.63E+00	2.08E+00	Ea	1.00
	450	1.28E+03	6.23E+02		2.53E+02	5.26E+02								3.65E+02		3.64E+02		2.22	2.22E-03	-2.65E+00	2.56E+00	6563	3.64E+02
	P1	392000000000	76000000000	1.31E-27
	P2	11360	1.4	1.25E+01												Ea shift
	P3		20.8	5.72E+03												2.92E+02
>CHOO. | -CH3	T	Miyoshi 2011	Sharma et al. 2010	Vereecken 2019										T-dependence	Target	Final		1000/T	1/T	log(1/T)	log(>CHOO. | -CH3)	log(T)	Replicate
	200	8.42E-14	1.48E-13	2.29E-11										2.29E-11		5.33E-12		5.00	5.00E-03	-2.30E+00	-1.13E+01	A	2.44E-12
	225	4.64E-11	5.87E-11	2.38E-09										2.38E-09		6.51E-10		4.44	4.44E-03	-2.35E+00	-9.19E+00	2.57E+09	0.46
	250	7.23E-09	7.13E-09	1.12E-07										1.12E-07		3.50E-08		4.00	4.00E-03	-2.40E+00	-7.46E+00	Ea
	260	4.15E-08	3.77E-08	4.41E-07										4.41E-07		1.44E-07		3.85	3.85E-03	-2.41E+00	-6.84E+00	9.68E+03
	270	2.09E-07	1.77E-07	1.59E-06										1.59E-06		5.42E-07		3.70	3.70E-03	-2.43E+00	-6.27E+00		1.31
	280	9.40E-07	7.42E-07	5.34E-06										5.34E-06		1.89E-06		3.57	3.57E-03	-2.45E+00	-5.72E+00		2.48E-06
	290	3.81E-06	2.83E-06	1.67E-05										1.67E-05		6.12E-06		3.45	3.45E-03	-2.46E+00	-5.21E+00	-1.25E+01
	298	1.09E-05	7.74E-06	3.99E-05										3.99E-05	1.50E-05	1.50E-05		3.36	3.36E-03	-2.47E+00	-4.82E+00	-2.61E+03
	310	4.77E-05	3.19E-05	1.37E-04										1.37E-04		5.35E-05		3.23	3.23E-03	-2.49E+00	-4.27E+00	-2.69E+01
	320	1.50E-04	9.57E-05	3.62E-04										3.62E-04		1.46E-04		3.13	3.13E-03	-2.51E+00	-3.84E+00	#N/A
	330	4.40E-04	2.69E-04	9.13E-04										9.13E-04		3.77E-04		3.03	3.03E-03	-2.52E+00	-3.42E+00	#N/A
	340	1.21E-03	7.14E-04	2.21E-03										2.21E-03		9.35E-04		2.94	2.94E-03	-2.53E+00	-3.03E+00	A	9.35E-04
	350	3.14E-03	1.79E-03	5.12E-03										5.12E-03		2.22E-03		2.86	2.86E-03	-2.54E+00	-2.65E+00	1.31E-27	1.00
	375	2.74E-02	1.45E-02	3.59E-02										3.59E-02		1.65E-02		2.67	2.67E-03	-2.57E+00	-1.78E+00	n
	400	1.82E-01	9.08E-02	2.08E-01										2.08E-01		1.00E-01		2.50	2.50E-03	-2.60E+00	-9.98E-01	12.46
	425	9.66E-01	4.61E-01	1.03E+00										1.03E+00		5.17E-01		2.35	2.35E-03	-2.63E+00	-2.86E-01	Ea	1.00
	450	4.26E+00	1.96E+00	4.42E+00										4.42E+00		2.31E+00		2.22	2.22E-03	-2.65E+00	3.64E-01	6010	2.31E+00
	P1	526000000000	140000000000	6.18E+11	8.68E-19	1.00E-29
	P2	9970	0.2	1.13E+04	9.46E+00	1.31E+01										Ea shift
	P3		18.5	8.00E+07	5.72E+03	4.23E+03										-1.03E+01
>CHOO. | -CH2-	T	Miyoshi 2011	Sharma et al. 2010	Otkjaer et al. 2018	Vereecken 2019	Vereecken 2019								T-dependence	Target	Final		1000/T	1/T	log(1/T)	log(>CHOO. | -CH2-)	log(T)	Replicate
	200	1.18E-10	6.15E-10		1.92E-09	7.21E-09								3.73E-09		3.92E-09		5.00	5.00E-03	-2.30E+00	-8.41E+00	A	1.94E-09
	225	3.00E-08	1.11E-07		1.40E-07	3.53E-07								2.23E-07		2.33E-07		4.44	4.44E-03	-2.35E+00	-6.63E+00	1.89E+09	0.49
	250	2.52E-06	7.11E-06		4.83E-06	9.19E-06								6.66E-06		6.94E-06		4.00	4.00E-03	-2.40E+00	-5.16E+00	Ea
	260	1.17E-05	3.00E-05		1.69E-05	2.94E-05								2.23E-05		2.32E-05		3.85	3.85E-03	-2.41E+00	-4.64E+00	8.28E+03
	270	4.83E-05	1.14E-04		5.44E-05	8.80E-05								6.92E-05		7.19E-05		3.70	3.70E-03	-2.43E+00	-4.14E+00		1.28
	280	1.81E-04	3.93E-04		1.63E-04	2.48E-04								2.01E-04		2.09E-04		3.57	3.57E-03	-2.45E+00	-3.68E+00		2.67E-04
	290	6.17E-04	1.25E-03	1.96E-04	4.61E-04	6.60E-04								5.51E-04		5.71E-04		3.45	3.45E-03	-2.46E+00	-3.24E+00	-1.13E+01
	298	1.55E-03	2.97E-03	4.32E-04	1.01E-03	1.39E-03								1.19E-03	1.23E-03	1.23E-03		3.36	3.36E-03	-2.47E+00	-2.91E+00	-2.16E+03
	310	5.67E-03	1.00E-02	1.34E-03	3.09E-03	4.05E-03								3.54E-03		3.65E-03		3.23	3.23E-03	-2.49E+00	-2.44E+00	-2.35E+01
	320	1.55E-02	2.58E-02	3.28E-03	7.42E-03	9.39E-03								8.35E-03		8.62E-03		3.13	3.13E-03	-2.51E+00	-2.06E+00	#N/A
	330	3.98E-02	6.26E-02		1.71E-02	2.10E-02								1.89E-02		1.95E-02		3.03	3.03E-03	-2.52E+00	-1.71E+00	#N/A
	340	9.68E-02	1.44E-01		3.76E-02	4.52E-02								4.12E-02		4.25E-02		2.94	2.94E-03	-2.53E+00	-1.37E+00	A	4.25E-02
	350	2.24E-01	3.18E-01		8.01E-02	9.41E-02								8.68E-02		8.94E-02		2.86	2.86E-03	-2.54E+00	-1.05E+00	2.95E-24	1.00
	375	1.49E+00	1.90E+00		4.57E-01	5.19E-01								4.87E-01		5.01E-01		2.67	2.67E-03	-2.57E+00	-3.01E-01	n
	400	7.87E+00	9.07E+00		2.18E+00	2.44E+00								2.31E+00		2.37E+00		2.50	2.50E-03	-2.60E+00	3.75E-01	11.26
	425	3.41E+01	3.61E+01		8.97E+00	1.01E+01								9.50E+00		9.73E+00		2.35	2.35E-03	-2.63E+00	9.88E-01	Ea	1.00
	450	1.26E+02	1.23E+02		3.25E+01	3.69E+01								3.46E+01		3.54E+01		2.22	2.22E-03	-2.65E+00	1.55E+00	4966	3.54E+01
	P1	242000000000	5.79E+11	1.64E-35
	P2	8480	1.01E+04	1.50E+01												Ea shift
	P3		7.69E+07	2285.95658527482												1.35E+02
>CHOO. | >CH-	T	Miyoshi 2011	Otkjaer et al. 2018	Vereecken 2019										T-dependence	Target	Final		1000/T	1/T	log(1/T)	log(>CHOO. | >CH-)	log(T)	Replicate
	200	9.33E-08		5.39E-06										5.39E-06		2.75E-06		5.00	5.00E-03	-2.30E+00	-5.56E+00	A	1.08E-06
	225	1.04E-05		1.12E-04										1.12E-04		6.17E-05		4.44	4.44E-03	-2.35E+00	-4.21E+00	7.54E+08	0.39
	250	4.49E-04		1.50E-03										1.50E-03		8.77E-04		4.00	4.00E-03	-2.40E+00	-3.06E+00	Ea
	260	1.66E-03		3.84E-03										3.84E-03		2.29E-03		3.85	3.85E-03	-2.41E+00	-2.64E+00	6.84E+03
	270	5.54E-03		9.37E-03										9.37E-03		5.69E-03		3.70	3.70E-03	-2.43E+00	-2.24E+00		1.39
	280	1.70E-02		2.19E-02										2.19E-02		1.35E-02		3.57	3.57E-03	-2.45E+00	-1.87E+00		1.88E-02
	290	4.84E-02	1.02E-02	4.90E-02										4.90E-02		3.08E-02		3.45	3.45E-03	-2.46E+00	-1.51E+00	-1.50E+01
	298	1.06E-01	2.02E-02	9.11E-02										9.11E-02	5.80E-02	5.80E-02		3.36	3.36E-03	-2.47E+00	-1.24E+00	-1.05E+03
	310	3.19E-01	5.42E-02	2.21E-01										2.21E-01		1.43E-01		3.23	3.23E-03	-2.49E+00	-8.43E-01	-3.48E+01
	320	7.50E-01	1.19E-01	4.49E-01										4.49E-01		2.95E-01		3.13	3.13E-03	-2.51E+00	-5.31E-01	#N/A
	330	1.67E+00		8.84E-01										8.84E-01		5.88E-01		3.03	3.03E-03	-2.52E+00	-2.31E-01	#N/A
	340	3.56E+00		1.69E+00										1.69E+00		1.14E+00		2.94	2.94E-03	-2.53E+00	5.72E-02	A	1.14E+00
	350	7.27E+00		3.17E+00										3.17E+00		2.16E+00		2.86	2.86E-03	-2.54E+00	3.34E-01	1.64E-35	1.00
	375	3.66E+01		1.38E+01										1.38E+01		9.63E+00		2.67	2.67E-03	-2.57E+00	9.83E-01	n
	400	1.50E+02		5.30E+01										5.30E+01		3.79E+01		2.50	2.50E-03	-2.60E+00	1.58E+00	14.99
	425	5.23E+02		1.84E+02										1.84E+02		1.34E+02		2.35	2.35E-03	-2.63E+00	2.13E+00	Ea	1.00
	450	1.58E+03		5.85E+02										5.85E+02		4.34E+02		2.22	2.22E-03	-2.65E+00	2.64E+00	2420	4.34E+02
	P1	505000000000	140000000000
	P2	11310	0.2													Ea shift
	P3		18.5													4.13E+02
>C(OO.)- | -CH3	T	Miyoshi 2011	Sharma et al. 2010											T-dependence	Target	Final		1000/T	1/T	log(1/T)	log(>C(OO.)- | -CH3)	log(T)	Replicate
	200	1.39E-13	6.15E-10											2.18E-09		2.77E-10		5.00	5.00E-03	-2.30E+00	-9.56E+00	A	1.41E-10
	225	7.46E-11	1.11E-07											1.43E-07		2.28E-08		4.44	4.44E-03	-2.35E+00	-7.64E+00	2.11E+09	0.51
	250	1.14E-08	7.11E-06											4.57E-06		8.75E-07		4.00	4.00E-03	-2.40E+00	-6.06E+00	Ea
	260	6.48E-08	3.00E-05											1.56E-05		3.19E-06		3.85	3.85E-03	-2.41E+00	-5.50E+00	8.83E+03
	270	3.24E-07	1.14E-04											4.95E-05		1.07E-05		3.70	3.70E-03	-2.43E+00	-4.97E+00		1.27
	280	1.45E-06	3.93E-04											1.47E-04		3.35E-05		3.57	3.57E-03	-2.45E+00	-4.48E+00		4.24E-05
	290	5.83E-06	1.25E-03											4.08E-04		9.81E-05		3.45	3.45E-03	-2.46E+00	-4.01E+00	-1.08E+01
	298	1.66E-05	2.97E-03											8.88E-04	2.22E-04	2.22E-04		3.36	3.36E-03	-2.47E+00	-3.65E+00	-2.45E+03
	310	7.22E-05	1.00E-02											2.69E-03		7.08E-04		3.23	3.23E-03	-2.49E+00	-3.15E+00	-2.21E+01
	320	2.26E-04	2.58E-02											6.42E-03		1.76E-03		3.13	3.13E-03	-2.51E+00	-2.75E+00	#N/A
	330	6.59E-04	6.26E-02											1.47E-02		4.20E-03		3.03	3.03E-03	-2.52E+00	-2.38E+00	#N/A
	340	1.81E-03	1.44E-01											3.23E-02		9.59E-03		2.94	2.94E-03	-2.53E+00	-2.02E+00	A	9.59E-03
	350	4.67E-03	3.18E-01											6.86E-02		2.11E-02		2.86	2.86E-03	-2.54E+00	-1.68E+00	7.45E-23	1.00
	375	4.03E-02	1.90E+00											3.92E-01		1.30E-01		2.67	2.67E-03	-2.57E+00	-8.85E-01	n
	400	2.65E-01	9.07E+00											1.88E+00		6.70E-01		2.50	2.50E-03	-2.60E+00	-1.74E-01	10.79
	425	1.40E+00	3.61E+01											7.83E+00		2.96E+00		2.35	2.35E-03	-2.63E+00	4.71E-01	Ea	1.00
	450	6.14E+00	1.23E+02											2.88E+01		1.15E+01		2.22	2.22E-03	-2.65E+00	1.06E+00	5650	1.15E+01
	P1	348000000000	1.43E+12	1.43E+12
	P2	9960	1.16E+04	1.16E+04												Ea shift
	P3		7.53E+07	7.53E+07												2.04E+02
>C(OO.)- | -CH2-	T	Miyoshi 2011	Otkjaer et al. 2018	Praske et al. 2019										T-dependence	Target	Final		1000/T	1/T	log(1/T)	log(>C(OO.)- | -CH2-)	log(T)	Replicate
	200	8.20E-11												2.18E-09		7.89E-10		5.00	5.00E-03	-2.30E+00	-9.10E+00	A	4.02E-10
	225	2.07E-08												1.43E-07		5.78E-08		4.44	4.44E-03	-2.35E+00	-7.24E+00	2.11E+09	0.51
	250	1.73E-06												4.57E-06		2.02E-06		4.00	4.00E-03	-2.40E+00	-5.69E+00	Ea
	260	8.03E-06												1.56E-05		7.14E-06		3.85	3.85E-03	-2.41E+00	-5.15E+00	8.62E+03
	270	3.32E-05												4.95E-05		2.33E-05		3.70	3.70E-03	-2.43E+00	-4.63E+00		1.27
	280	1.24E-04												1.47E-04		7.08E-05		3.57	3.57E-03	-2.45E+00	-4.15E+00		8.97E-05
	290	4.22E-04	1.33E-04	1.21E-04										4.08E-04		2.02E-04		3.45	3.45E-03	-2.46E+00	-3.69E+00	-1.08E+01
	298	1.06E-03	3.06E-04	2.78E-04										8.88E-04	4.49E-04	4.49E-04		3.36	3.36E-03	-2.47E+00	-3.35E+00	-2.36E+03
	310	3.87E-03	1.00E-03	9.16E-04										2.69E-03		1.39E-03		3.23	3.23E-03	-2.49E+00	-2.86E+00	-2.21E+01
	320	1.06E-02	2.57E-03	2.35E-03										6.42E-03		3.40E-03		3.13	3.13E-03	-2.51E+00	-2.47E+00	#N/A
	330	2.72E-02												1.47E-02		7.93E-03		3.03	3.03E-03	-2.52E+00	-2.10E+00	#N/A
	340	6.60E-02												3.23E-02		1.78E-02		2.94	2.94E-03	-2.53E+00	-1.75E+00	A	1.78E-02
	350	1.52E-01												6.86E-02		3.84E-02		2.86	2.86E-03	-2.54E+00	-1.42E+00	7.45E-23	1.00
	375	1.02E+00												3.92E-01		2.28E-01		2.67	2.67E-03	-2.57E+00	-6.42E-01	n
	400	5.34E+00												1.88E+00		1.13E+00		2.50	2.50E-03	-2.60E+00	5.39E-02	10.79
	425	2.31E+01												7.83E+00		4.85E+00		2.35	2.35E-03	-2.63E+00	6.86E-01	Ea	1.00
	450	8.50E+01												2.88E+01		1.83E+01		2.22	2.22E-03	-2.65E+00	1.26E+00	5440	1.83E+01
	P1	357000000000	245.151593338579	2.33384991776809E-74	0.001225092329708
	P2	8500	2.92027374960677	27.5094879231455	4.48344150168447											Ea shift
	P3		9386.41569755721	-1229.47022118214	8464.98188880682											0.00E+00
>C(OO.)- | >CH-	T	Miyoshi 2011	Vereecken 2019	Vereecken 2019	Vereecken 2019									T-dependence	Target	Final		1000/T	1/T	log(1/T)	log(>C(OO.)- | >CH-)	log(T)	Replicate
	200	1.24E-07	5.33E-12	2.18E-08	1.05E-11									6.25E-10		6.25E-10		5.00	5.00E-03	-2.30E+00	-9.20E+00	A	3.62E-10
	225	1.40E-05	1.38E-09	2.81E-07	1.97E-09									5.72E-08		5.72E-08		4.44	4.44E-03	-2.35E+00	-7.24E+00	6.05E+09	0.58
	250	6.12E-04	1.22E-07	2.95E-06	1.36E-07									2.34E-06		2.34E-06		4.00	4.00E-03	-2.40E+00	-5.63E+00	Ea
	260	2.26E-03	5.80E-07	7.18E-06	5.97E-07									8.66E-06		8.66E-06		3.85	3.85E-03	-2.41E+00	-5.06E+00	8.85E+03
	270	7.59E-03	2.46E-06	1.70E-05	2.36E-06									2.95E-05		2.95E-05		3.70	3.70E-03	-2.43E+00	-4.53E+00		1.21
	280	2.34E-02	9.48E-06	3.94E-05	8.52E-06									9.28E-05		9.28E-05		3.57	3.57E-03	-2.45E+00	-4.03E+00		1.12E-04
	290	6.66E-02	3.34E-05	8.88E-05	2.83E-05									2.73E-04		2.73E-04		3.45	3.45E-03	-2.46E+00	-3.56E+00	-8.73E+00
	298	1.46E-01	8.62E-05	1.68E-04	6.99E-05									6.20E-04	6.20E-04	6.20E-04		3.36	3.36E-03	-2.47E+00	-3.21E+00	-2.73E+03
	310	4.41E-01	3.27E-04	4.23E-04	2.51E-04									1.98E-03		1.98E-03		3.23	3.23E-03	-2.49E+00	-2.70E+00	-1.57E+01
	320	1.04E+00	9.25E-04	8.96E-04	6.78E-04									4.92E-03		4.92E-03		3.13	3.13E-03	-2.51E+00	-2.31E+00	#N/A
	330	2.32E+00	2.46E-03	1.86E-03	1.74E-03									1.17E-02		1.17E-02		3.03	3.03E-03	-2.52E+00	-1.93E+00	#N/A
	340	4.96E+00	6.20E-03	3.79E-03	4.22E-03									2.65E-02		2.65E-02		2.94	2.94E-03	-2.53E+00	-1.58E+00	A	2.65E-02
	350	1.01E+01	1.49E-02	7.58E-03	9.79E-03									5.78E-02		5.78E-02		2.86	2.86E-03	-2.54E+00	-1.24E+00	2.24E-16	1.00
	375	5.11E+01	1.09E-01	4.00E-02	6.69E-02									3.49E-01		3.49E-01		2.67	2.67E-03	-2.57E+00	-4.57E-01	n
	400	2.11E+02	6.27E-01	1.92E-01	3.66E-01									1.75E+00		1.75E+00		2.50	2.50E-03	-2.60E+00	2.42E-01	8.73
	425	7.36E+02	2.97E+00	8.51E-01	1.67E+00									7.47E+00		7.47E+00		2.35	2.35E-03	-2.63E+00	8.73E-01	Ea	1.00
	450	2.24E+03	1.20E+01	3.49E+00	6.52E+00									2.79E+01		2.79E+01		2.22	2.22E-03	-2.65E+00	1.45E+00	6280	2.79E+01
1,6 Hshift
	Average Temperature dependence															1.14E+02
	T	-CH2OO. | -CH3	-CH2OO. | -CH2-	-CH2OO. | >CH-	>CHOO. | -CH3	>CHOO. | >CH-								T-dependence	Target	Final		1000/T	1/T	log(1/T)	log()	log(T)	Replicate
	200	1.36E-12	3.88E-09	9.86E-08	1.28E-11	1.45E-05								2.49E-09		1.41E-09		5.00	5.00E-03	-2.30E+00	-8.85E+00	A	7.99E-10
	225	1.92E-10	2.64E-07	5.94E-06	1.37E-09	2.16E-04								1.55E-07		9.32E-08		4.44	4.44E-03	-2.35E+00	-7.03E+00	8.23E+08	0.57
	250	1.11E-08	8.36E-06	1.65E-04	6.50E-08	2.21E-03								4.66E-06		2.95E-06		4.00	4.00E-03	-2.40E+00	-5.53E+00	Ea
	260	4.61E-08	2.82E-05	5.29E-04	2.54E-07	5.16E-03								1.55E-05		1.00E-05		3.85	3.85E-03	-2.41E+00	-5.00E+00	8.30E+03
	270	1.75E-07	8.78E-05	1.56E-03	9.14E-07	1.15E-02								4.79E-05		3.14E-05		3.70	3.70E-03	-2.43E+00	-4.50E+00		1.22
	280	6.10E-07	2.55E-04	4.30E-03	3.04E-06	2.48E-02								1.38E-04		9.18E-05		3.57	3.57E-03	-2.45E+00	-4.04E+00		1.12E-04
	290	1.97E-06	6.92E-04	1.11E-02	9.42E-06	5.15E-02								3.74E-04		2.52E-04		3.45	3.45E-03	-2.46E+00	-3.60E+00	-9.05E+00
	298	4.80E-06	1.48E-03	2.26E-02	2.22E-05	9.03E-02								7.97E-04	5.43E-04	5.43E-04		3.36	3.36E-03	-2.47E+00	-3.26E+00	-2.44E+03
	310	1.69E-05	4.31E-03	6.21E-02	7.53E-05	2.03E-01								2.33E-03		1.61E-03		3.23	3.23E-03	-2.49E+00	-2.79E+00	-1.75E+01
	320	4.54E-05	9.99E-03	1.37E-01	1.96E-04	3.85E-01								5.42E-03		3.79E-03		3.13	3.13E-03	-2.51E+00	-2.42E+00	#N/A
	330	1.16E-04	2.22E-02	2.87E-01	4.87E-04	7.15E-01								1.21E-02		8.54E-03		3.03	3.03E-03	-2.52E+00	-2.07E+00	#N/A
	340	2.81E-04	4.72E-02	5.81E-01	1.16E-03	1.30E+00								2.59E-02		1.85E-02		2.94	2.94E-03	-2.53E+00	-1.73E+00	A	1.85E-02
	350	6.55E-04	9.68E-02	1.13E+00	2.64E-03	2.30E+00								5.34E-02		3.85E-02		2.86	2.86E-03	-2.54E+00	-1.41E+00	3.47E-18	1.00
	375	4.57E-03	5.05E-01	5.21E+00	1.77E-02	8.85E+00								2.85E-01		2.10E-01		2.67	2.67E-03	-2.57E+00	-6.77E-01	n
	400	2.59E-02	2.21E+00	2.02E+01	9.81E-02	3.06E+01								1.28E+00		9.64E-01		2.50	2.50E-03	-2.60E+00	-1.61E-02	9.05
	425	1.24E-01	8.34E+00	6.77E+01	4.61E-01	9.65E+01								4.99E+00		3.82E+00		2.35	2.35E-03	-2.63E+00	5.82E-01	Ea	1.00
	450	5.10E-01	2.78E+01	2.01E+02	1.89E+00	2.81E+02								1.72E+01		1.34E+01		2.22	2.22E-03	-2.65E+00	1.13E+00	5628	1.34E+01
	P1	43600000000	13000000000	1.30E+11	5.66E-17
	P2	11020	1.5	1.23E+04	8.59E+00											Ea shift
	P3		20	8.04E+07	7085.72330495518											5.17E+01
-CH2OO. | -CH3	T	Miyoshi 2011	Sharma et al. 2010	Otkjaer et al. 2018	Vereecken 2019									T-dependence	Target	Final		1000/T	1/T	log(1/T)	log(-CH2OO. | -CH3)	log(T)	Replicate
	200	5.13E-14	1.62E-13		1.36E-12									1.36E-12		1.05E-12		5.00	5.00E-03	-2.30E+00	-1.20E+01	A	6.14E-13
	225	2.34E-11	5.18E-11		1.92E-10									1.92E-10		1.52E-10		4.44	4.44E-03	-2.35E+00	-9.82E+00	6.08E+08	0.58
	250	3.13E-09	5.31E-09		1.11E-08									1.11E-08		8.99E-09		4.00	4.00E-03	-2.40E+00	-8.05E+00	Ea
	260	1.71E-08	2.65E-08		4.61E-08									4.61E-08		3.78E-08		3.85	3.85E-03	-2.41E+00	-7.42E+00	9.67E+03
	270	8.20E-08	1.18E-07		1.75E-07									1.75E-07		1.44E-07		3.70	3.70E-03	-2.43E+00	-6.84E+00		1.21
	280	3.52E-07	4.71E-07		6.10E-07									6.10E-07		5.07E-07		3.57	3.57E-03	-2.45E+00	-6.29E+00		6.12E-07
	290	1.37E-06	1.71E-06	1.34E-06	1.97E-06									1.97E-06		1.65E-06		3.45	3.45E-03	-2.46E+00	-5.78E+00	-8.59E+00
	298	3.80E-06	4.53E-06	3.22E-06	4.80E-06									4.80E-06	4.04E-06	4.04E-06		3.36	3.36E-03	-2.47E+00	-5.39E+00	-3.10E+03
	310	1.59E-05	1.78E-05	1.13E-05	1.69E-05									1.69E-05		1.43E-05		3.23	3.23E-03	-2.49E+00	-4.84E+00	-1.62E+01
	320	4.82E-05	5.14E-05	3.06E-05	4.54E-05									4.54E-05		3.86E-05		3.13	3.13E-03	-2.51E+00	-4.41E+00	#N/A
	330	1.37E-04	1.40E-04		1.16E-04									1.16E-04		9.90E-05		3.03	3.03E-03	-2.52E+00	-4.00E+00	#N/A
	340	3.66E-04	3.58E-04		2.81E-04									2.81E-04		2.42E-04		2.94	2.94E-03	-2.53E+00	-3.62E+00	A	2.42E-04
	350	9.23E-04	8.72E-04		6.55E-04									6.55E-04		5.65E-04		2.86	2.86E-03	-2.54E+00	-3.25E+00	5.66E-17	1.00
	375	7.53E-03	6.58E-03		4.57E-03									4.57E-03		3.98E-03		2.67	2.67E-03	-2.57E+00	-2.40E+00	n
	400	4.73E-02	3.88E-02		2.59E-02									2.59E-02		2.28E-02		2.50	2.50E-03	-2.60E+00	-1.64E+00	8.59
	425	2.39E-01	1.87E-01		1.24E-01									1.24E-01		1.09E-01		2.35	2.35E-03	-2.63E+00	-9.61E-01	Ea	1.00
	450	1.01E+00	7.58E-01		5.10E-01									5.10E-01		4.54E-01		2.22	2.22E-03	-2.65E+00	-3.43E-01	7137	4.54E-01
	P1	33900000000	7400000000	1.17E+11	1.17E+11	1.39E+11	8.32E-15	1.37862846159067E-13	1.59E-27	4.33E+06
	P2	9220	1.2	1.09E+04	1.09E+04	1.08E+04	7.90E+00	7.50521477104948	1.20E+01	1.32E+00						Ea shift
	P3		16.6	8.07E+07	8.07E+07	7.69E+07	5.94E+03	5990.30095583598	3576.37560431752	8771.96692234863						1.53E+02
-CH2OO. | -CH2-	T	Miyoshi 2011	Sharma et al. 2010	Otkjaer et al. 2018	Otkjaer et al. 2018	Otkjaer et al. 2018	Vereecken 2019	Vereecken 2019	Vereecken 2019	Vereecken 2019				T-dependence	Target	Final		1000/T	1/T	log(1/T)	log(-CH2OO. | -CH2-)	log(T)	Replicate
	200	3.23E-10	7.75E-10				1.55E-09	2.52E-09	1.39E-07	4.20E-10				3.88E-09		1.81E-09		5.00	5.00E-03	-2.30E+00	-8.74E+00	A	1.15E-09
	225	5.42E-08	9.26E-08				1.07E-07	1.70E-07	4.17E-06	6.42E-08				2.64E-07		1.34E-07		4.44	4.44E-03	-2.35E+00	-6.87E+00	1.50E+09	0.64
	250	3.26E-06	4.30E-06				3.44E-06	5.37E-06	7.27E-05	3.64E-06				8.36E-06		4.53E-06		4.00	4.00E-03	-2.40E+00	-5.34E+00	Ea
	260	1.35E-05	1.63E-05				1.17E-05	1.81E-05	2.02E-04	1.48E-05				2.82E-05		1.56E-05		3.85	3.85E-03	-2.41E+00	-4.81E+00	8.34E+03
	270	5.01E-05	5.61E-05				3.67E-05	5.65E-05	5.30E-04	5.41E-05				8.78E-05		4.98E-05		3.70	3.70E-03	-2.43E+00	-4.30E+00		1.17
	280	1.70E-04	1.77E-04				1.07E-04	1.64E-04	1.32E-03	1.81E-04				2.55E-04		1.47E-04		3.57	3.57E-03	-2.45E+00	-3.83E+00		1.72E-04
	290	5.28E-04	5.16E-04	1.52E-04	1.52E-04	2.18E-04	2.94E-04	4.46E-04	3.12E-03	5.59E-04				6.92E-04		4.08E-04		3.45	3.45E-03	-2.46E+00	-3.39E+00	-7.19E+00
	298	1.24E-03	1.16E-03	3.22E-04	3.22E-04	4.63E-04	6.32E-04	9.53E-04	6.04E-03	1.31E-03				1.48E-03	8.83E-04	8.83E-04		3.36	3.36E-03	-2.47E+00	-3.05E+00	-2.70E+03
	310	4.11E-03	3.59E-03	9.42E-04	9.42E-04	1.36E-03	1.87E-03	2.79E-03	1.55E-02	4.30E-03				4.31E-03		2.63E-03		3.23	3.23E-03	-2.49E+00	-2.58E+00	-1.18E+01
	320	1.04E-02	8.65E-03	2.21E-03	2.21E-03	3.20E-03	4.37E-03	6.48E-03	3.25E-02	1.09E-02				9.99E-03		6.19E-03		3.13	3.13E-03	-2.51E+00	-2.21E+00	#N/A
	330	2.49E-02	1.98E-02				9.78E-03	1.44E-02	6.60E-02	2.59E-02				2.22E-02		1.39E-02		3.03	3.03E-03	-2.52E+00	-1.86E+00	#N/A
	340	5.66E-02	4.32E-02				2.10E-02	3.07E-02	1.30E-01	5.90E-02				4.72E-02		3.01E-02		2.94	2.94E-03	-2.53E+00	-1.52E+00	A	3.01E-02
	350	1.23E-01	9.03E-02				4.35E-02	6.31E-02	2.49E-01	1.28E-01				9.68E-02		6.25E-02		2.86	2.86E-03	-2.54E+00	-1.20E+00	1.68E-12	1.00
	375	7.12E-01	4.82E-01				2.33E-01	3.32E-01	1.13E+00	7.45E-01				5.05E-01		3.36E-01		2.67	2.67E-03	-2.57E+00	-4.74E-01	n
	400	3.31E+00	2.09E+00				1.04E+00	1.46E+00	4.46E+00	3.50E+00				2.21E+00		1.51E+00		2.50	2.50E-03	-2.60E+00	1.78E-01	7.19
	425	1.28E+01	7.70E+00				4.04E+00	5.56E+00	1.57E+01	1.38E+01				8.34E+00		5.82E+00		2.35	2.35E-03	-2.63E+00	7.65E-01	Ea	1.00
	450	4.29E+01	2.46E+01				1.38E+01	1.87E+01	4.97E+01	4.68E+01				2.78E+01		1.98E+01		2.22	2.22E-03	-2.65E+00	1.30E+00	6223	1.98E+01
	P1	15300000000	6800000000	9.59E+10	1.88E-03
	P2	7720	1.2	9.62E+03	4.25E+00											Ea shift
	P3		13.8	7.32E+07	6476.06265083502											-1.91E+02
-CH2OO. | >CH-	T	Miyoshi 2011	Sharma et al. 2010	Otkjaer et al. 2018	Vereecken 2019									T-dependence	Target	Final		1000/T	1/T	log(1/T)	log(-CH2OO. | >CH-)	log(T)	Replicate
	200	2.64E-07	8.18E-07		9.86E-08									9.86E-08		2.56E-07		5.00	5.00E-03	-2.30E+00	-6.59E+00	A	1.96E-07
	225	1.92E-05	4.46E-05		5.94E-06									5.94E-06		1.39E-05		4.44	4.44E-03	-2.35E+00	-4.86E+00	4.59E+09	0.77
	250	5.94E-04	1.11E-03		1.65E-04									1.65E-04		3.55E-04		4.00	4.00E-03	-2.40E+00	-3.45E+00	Ea
	260	1.95E-03	3.39E-03		5.29E-04									5.29E-04		1.10E-03		3.85	3.85E-03	-2.41E+00	-2.96E+00	7.54E+03
	270	5.85E-03	9.53E-03		1.56E-03									1.56E-03		3.17E-03		3.70	3.70E-03	-2.43E+00	-2.50E+00		1.10
	280	1.62E-02	2.49E-02		4.30E-03									4.30E-03		8.49E-03		3.57	3.57E-03	-2.45E+00	-2.07E+00		9.32E-03
	290	4.20E-02	6.12E-02	7.56E-03	1.11E-02									1.11E-02		2.14E-02		3.45	3.45E-03	-2.46E+00	-1.67E+00	-4.25E+00
	298	8.59E-02	1.20E-01	1.46E-02	2.26E-02									2.26E-02	4.30E-02	4.30E-02		3.36	3.36E-03	-2.47E+00	-1.37E+00	-2.73E+03
	310	2.34E-01	3.11E-01	3.73E-02	6.21E-02									6.21E-02		1.15E-01		3.23	3.23E-03	-2.49E+00	-9.40E-01	-2.73E+00
	320	5.10E-01	6.50E-01	7.87E-02	1.37E-01									1.37E-01		2.48E-01		3.13	3.13E-03	-2.51E+00	-6.06E-01	#N/A
	330	1.06E+00	1.30E+00		2.87E-01									2.87E-01		5.12E-01		3.03	3.03E-03	-2.52E+00	-2.90E-01	#N/A
	340	2.11E+00	2.51E+00		5.81E-01									5.81E-01		1.02E+00		2.94	2.94E-03	-2.53E+00	7.92E-03	A	1.02E+00
	350	4.03E+00	4.65E+00		1.13E+00									1.13E+00		1.95E+00		2.86	2.86E-03	-2.54E+00	2.91E-01	1.88E-03	1.00
	375	1.75E+01	1.90E+01		5.21E+00									5.21E+00		8.67E+00		2.67	2.67E-03	-2.57E+00	9.38E-01	n
	400	6.35E+01	6.52E+01		2.02E+01									2.02E+01		3.25E+01		2.50	2.50E-03	-2.60E+00	1.51E+00	4.25
	425	1.98E+02	1.95E+02		6.77E+01									6.77E+01		1.06E+02		2.35	2.35E-03	-2.63E+00	2.03E+00	Ea	1.00
	450	5.42E+02	5.17E+02		2.01E+02									2.01E+02		3.08E+02		2.22	2.22E-03	-2.65E+00	2.49E+00	6285	3.08E+02
	P1	92700000000	7.28043072177615E-16	6.75E-29
	P2	11210	8.30655708576072	1.27E+01												Ea shift
	P3		7182.78398304102	5.20E+03												1.64E+02
>CHOO. | -CH3	T	Miyoshi 2011	Vereecken 2019	Vereecken 2019										T-dependence	Target	Final		1000/T	1/T	log(1/T)	log(>CHOO. | -CH3)	log(T)	Replicate
	200	4.22E-14	2.39E-12	6.81E-11										1.28E-11		5.62E-12		5.00	5.00E-03	-2.30E+00	-1.13E+01	A	2.91E-12
	225	2.14E-11	3.44E-10	5.47E-09										1.37E-09		6.61E-10		4.44	4.44E-03	-2.35E+00	-9.18E+00	9.77E+08	0.52
	250	3.11E-09	2.01E-08	2.10E-07										6.50E-08		3.37E-08		4.00	4.00E-03	-2.40E+00	-7.47E+00	Ea
	260	1.75E-08	8.40E-08	7.71E-07										2.54E-07		1.35E-07		3.85	3.85E-03	-2.41E+00	-6.87E+00	9.45E+03
	270	8.63E-08	3.20E-07	2.61E-06										9.14E-07		4.98E-07		3.70	3.70E-03	-2.43E+00	-6.30E+00		1.26
	280	3.80E-07	1.12E-06	8.25E-06										3.04E-06		1.69E-06		3.57	3.57E-03	-2.45E+00	-5.77E+00		2.13E-06
	290	1.51E-06	3.63E-06	2.45E-05										9.42E-06		5.35E-06		3.45	3.45E-03	-2.46E+00	-5.27E+00	-1.05E+01
	298	4.27E-06	8.84E-06	5.59E-05										2.22E-05	1.28E-05	1.28E-05		3.36	3.36E-03	-2.47E+00	-4.89E+00	-2.76E+03
	310	1.83E-05	3.12E-05	1.82E-04										7.53E-05		4.43E-05		3.23	3.23E-03	-2.49E+00	-4.35E+00	-2.17E+01
	320	5.67E-05	8.38E-05	4.59E-04										1.96E-04		1.17E-04		3.13	3.13E-03	-2.51E+00	-3.93E+00	#N/A
	330	1.64E-04	2.14E-04	1.11E-03										4.87E-04		2.96E-04		3.03	3.03E-03	-2.52E+00	-3.53E+00	#N/A
	340	4.45E-04	5.19E-04	2.58E-03										1.16E-03		7.15E-04		2.94	2.94E-03	-2.53E+00	-3.15E+00	A	7.15E-04
	350	1.14E-03	1.21E-03	5.78E-03										2.64E-03		1.65E-03		2.86	2.86E-03	-2.54E+00	-2.78E+00	2.22E-22	1.00
	375	9.65E-03	8.41E-03	3.74E-02										1.77E-02		1.15E-02		2.67	2.67E-03	-2.57E+00	-1.94E+00	n
	400	6.25E-02	4.76E-02	2.02E-01										9.81E-02		6.51E-02		2.50	2.50E-03	-2.60E+00	-1.19E+00	10.52
	425	3.25E-01	2.27E-01	9.39E-01										4.61E-01		3.14E-01		2.35	2.35E-03	-2.63E+00	-5.04E-01	Ea	1.00
	450	1.41E+00	9.31E-01	3.83E+00										1.89E+00		1.31E+00		2.22	2.22E-03	-2.65E+00	1.18E-01	6353	1.31E+00
	P1	79300000000
	P2	9610														Ea shift
	P3															5.28E+00
>CHOO. | -CH2-	T	Miyoshi 2011												T-dependence	Target	Final		1000/T	1/T	log(1/T)	log(>CHOO. | -CH2-)	log(T)	Replicate
	200	1.08E-10												2.49E-09		2.43E-09		5.00	5.00E-03	-2.30E+00	-8.61E+00	A	1.38E-09
	225	2.24E-08												1.55E-07		1.51E-07		4.44	4.44E-03	-2.35E+00	-6.82E+00	8.23E+08	0.57
	250	1.60E-06												4.66E-06		4.56E-06		4.00	4.00E-03	-2.40E+00	-5.34E+00	Ea
	260	7.03E-06												1.55E-05		1.52E-05		3.85	3.85E-03	-2.41E+00	-4.82E+00	8.19E+03
	270	2.76E-05												4.79E-05		4.70E-05		3.70	3.70E-03	-2.43E+00	-4.33E+00		1.22
	280	9.86E-05												1.38E-04		1.36E-04		3.57	3.57E-03	-2.45E+00	-3.87E+00		1.65E-04
	290	3.22E-04												3.74E-04		3.67E-04		3.45	3.45E-03	-2.46E+00	-3.43E+00	-9.05E+00
	298	7.83E-04												7.97E-04	7.83E-04	7.83E-04		3.36	3.36E-03	-2.47E+00	-3.11E+00	-2.40E+03
	310	2.73E-03												2.33E-03		2.29E-03		3.23	3.23E-03	-2.49E+00	-2.64E+00	-1.75E+01
	320	7.19E-03												5.42E-03		5.33E-03		3.13	3.13E-03	-2.51E+00	-2.27E+00	#N/A
	330	1.79E-02												1.21E-02		1.19E-02		3.03	3.03E-03	-2.52E+00	-1.93E+00	#N/A
	340	4.21E-02												2.59E-02		2.55E-02		2.94	2.94E-03	-2.53E+00	-1.59E+00	A	2.55E-02
	350	9.44E-02												5.34E-02		5.26E-02		2.86	2.86E-03	-2.54E+00	-1.28E+00	3.47E-18	1.00
	375	5.89E-01												2.85E-01		2.81E-01		2.67	2.67E-03	-2.57E+00	-5.51E-01	n
	400	2.92E+00												1.28E+00		1.27E+00		2.50	2.50E-03	-2.60E+00	1.02E-01	9.05
	425	1.20E+01												4.99E+00		4.93E+00		2.35	2.35E-03	-2.63E+00	6.93E-01	Ea	1.00
	450	4.21E+01												1.72E+01		1.70E+01		2.22	2.22E-03	-2.65E+00	1.23E+00	5519	1.70E+01
	P1	32800000000	1.28E-35
	P2	8100	1.47E+01													Ea shift
	P3		1746.57241952675													8.39E+01
>CHOO. | >CH-	T	Miyoshi 2011	Vereecken 2019											T-dependence	Target	Final		1000/T	1/T	log(1/T)	log(>CHOO. | >CH-)	log(T)	Replicate
	200	8.45E-08	1.45E-05											1.45E-05		9.53E-06		5.00	5.00E-03	-2.30E+00	-5.02E+00	A	3.79E-06
	225	7.61E-06	2.16E-04											2.16E-04		1.49E-04		4.44	4.44E-03	-2.35E+00	-3.83E+00	9.25E+07	0.40
	250	2.78E-04	2.21E-03											2.21E-03		1.58E-03		4.00	4.00E-03	-2.40E+00	-2.80E+00	Ea
	260	9.68E-04	5.16E-03											5.16E-03		3.73E-03		3.85	3.85E-03	-2.41E+00	-2.43E+00	6.17E+03
	270	3.07E-03	1.15E-02											1.15E-02		8.44E-03		3.70	3.70E-03	-2.43E+00	-2.07E+00		1.38
	280	8.96E-03	2.48E-02											2.48E-02		1.84E-02		3.57	3.57E-03	-2.45E+00	-1.74E+00		2.54E-02
	290	2.43E-02	5.15E-02											5.15E-02		3.86E-02		3.45	3.45E-03	-2.46E+00	-1.41E+00	-1.47E+01
	298	5.14E-02	9.03E-02											9.03E-02	6.82E-02	6.82E-02		3.36	3.36E-03	-2.47E+00	-1.17E+00	-7.95E+02
	310	1.47E-01	2.03E-01											2.03E-01		1.55E-01		3.23	3.23E-03	-2.49E+00	-8.11E-01	-3.49E+01
	320	3.33E-01	3.85E-01											3.85E-01		2.96E-01		3.13	3.13E-03	-2.51E+00	-5.28E-01	#N/A
	330	7.18E-01	7.15E-01											7.15E-01		5.54E-01		3.03	3.03E-03	-2.52E+00	-2.56E-01	#N/A
	340	1.48E+00	1.30E+00											1.30E+00		1.01E+00		2.94	2.94E-03	-2.53E+00	5.40E-03	A	1.01E+00
	350	2.92E+00	2.30E+00											2.30E+00		1.81E+00		2.86	2.86E-03	-2.54E+00	2.57E-01	1.28E-35	1.00
	375	1.36E+01	8.85E+00											8.85E+00		7.07E+00		2.67	2.67E-03	-2.57E+00	8.50E-01	n
	400	5.27E+01	3.06E+01											3.06E+01		2.48E+01		2.50	2.50E-03	-2.60E+00	1.39E+00	14.71
	425	1.73E+02	9.65E+01											9.65E+01		7.92E+01		2.35	2.35E-03	-2.63E+00	1.90E+00	Ea	1.00
	450	5.00E+02	2.81E+02											2.81E+02		2.33E+02		2.22	2.22E-03	-2.65E+00	2.37E+00	1831	2.33E+02
	P1	50400000000	4.50E+11
	P2	11420	12528													Ea shift
	P3		8.12E+07													1.72E+03
>C(OO.)- | -CH3	T	Miyoshi 2011	Praske et al. 2019											T-dependence	Target	Final		1000/T	1/T	log(1/T)	log(>C(OO.)- | -CH3)	log(T)	Replicate
	200	8.02E-15												2.49E-09		4.57E-13		5.00	5.00E-03	-2.30E+00	-1.23E+01	A	2.59E-13
	225	4.57E-12												1.55E-07		7.38E-11		4.44	4.44E-03	-2.35E+00	-1.01E+01	8.23E+08	0.57
	250	7.31E-10												4.66E-06		4.77E-09		4.00	4.00E-03	-2.40E+00	-8.32E+00	Ea
	260	4.24E-09												1.55E-05		2.07E-08		3.85	3.85E-03	-2.41E+00	-7.68E+00	9.90E+03
	270	2.15E-08												4.79E-05		8.17E-08		3.70	3.70E-03	-2.43E+00	-7.09E+00		1.22
	280	9.76E-08												1.38E-04		2.96E-07		3.57	3.57E-03	-2.45E+00	-6.53E+00		3.61E-07
	290	3.98E-07	2.18E-06											3.74E-04		9.90E-07		3.45	3.45E-03	-2.46E+00	-6.00E+00	-9.05E+00
	298	1.15E-06	5.34E-06											7.97E-04	2.48E-06	2.48E-06		3.36	3.36E-03	-2.47E+00	-5.61E+00	-3.14E+03
	310	5.05E-06	1.93E-05											2.33E-03		9.06E-06		3.23	3.23E-03	-2.49E+00	-5.04E+00	-1.75E+01
	320	1.60E-05	5.33E-05											5.42E-03		2.50E-05		3.13	3.13E-03	-2.51E+00	-4.60E+00	#N/A
	330	4.71E-05												1.21E-02		6.56E-05		3.03	3.03E-03	-2.52E+00	-4.18E+00	#N/A
	340	1.30E-04												2.59E-02		1.64E-04		2.94	2.94E-03	-2.53E+00	-3.79E+00	A	1.64E-04
	350	3.40E-04												5.34E-02		3.91E-04		2.86	2.86E-03	-2.54E+00	-3.41E+00	3.47E-18	1.00
	375	3.00E-03												2.85E-01		2.90E-03		2.67	2.67E-03	-2.57E+00	-2.54E+00	n
	400	2.01E-02												1.28E+00		1.74E-02		2.50	2.50E-03	-2.60E+00	-1.76E+00	9.05
	425	1.08E-01												4.99E+00		8.70E-02		2.35	2.35E-03	-2.63E+00	-1.06E+00	Ea	1.00
	450	4.80E-01												1.72E+01		3.76E-01		2.22	2.22E-03	-2.65E+00	-4.25E-01	7235	3.76E-01
	P1	57800000000
	P2	9790														Ea shift
	P3															2.80E+02
>C(OO.)- | -CH2-	T	Miyoshi 2011												T-dependence	Target	Final		1000/T	1/T	log(1/T)	log(>C(OO.)- | -CH2-)	log(T)	Replicate
	200	3.19E-11												2.49E-09		6.16E-10		5.00	5.00E-03	-2.30E+00	-9.21E+00	A	3.50E-10
	225	7.33E-09												1.55E-07		4.47E-08		4.44	4.44E-03	-2.35E+00	-7.35E+00	8.23E+08	0.57
	250	5.69E-07												4.66E-06		1.52E-06		4.00	4.00E-03	-2.40E+00	-5.82E+00	Ea
	260	2.56E-06												1.55E-05		5.30E-06		3.85	3.85E-03	-2.41E+00	-5.28E+00	8.46E+03
	270	1.03E-05												4.79E-05		1.70E-05		3.70	3.70E-03	-2.43E+00	-4.77E+00		1.22
	280	3.78E-05												1.38E-04		5.09E-05		3.57	3.57E-03	-2.45E+00	-4.29E+00		6.21E-05
	290	1.26E-04												3.74E-04		1.43E-04		3.45	3.45E-03	-2.46E+00	-3.85E+00	-9.05E+00
	298	3.12E-04												7.97E-04	3.12E-04	3.12E-04		3.36	3.36E-03	-2.47E+00	-3.51E+00	-2.52E+03
	310	1.11E-03												2.33E-03		9.47E-04		3.23	3.23E-03	-2.49E+00	-3.02E+00	-1.75E+01
	320	2.99E-03												5.42E-03		2.26E-03		3.13	3.13E-03	-2.51E+00	-2.65E+00	#N/A
	330	7.55E-03												1.21E-02		5.18E-03		3.03	3.03E-03	-2.52E+00	-2.29E+00	#N/A
	340	1.81E-02												2.59E-02		1.14E-02		2.94	2.94E-03	-2.53E+00	-1.94E+00	A	1.14E-02
	350	4.11E-02												5.34E-02		2.40E-02		2.86	2.86E-03	-2.54E+00	-1.62E+00	3.47E-18	1.00
	375	2.65E-01												2.85E-01		1.35E-01		2.67	2.67E-03	-2.57E+00	-8.69E-01	n
	400	1.36E+00												1.28E+00		6.37E-01		2.50	2.50E-03	-2.60E+00	-1.96E-01	9.05
	425	5.73E+00												4.99E+00		2.59E+00		2.35	2.35E-03	-2.63E+00	4.13E-01	Ea	1.00
	450	2.06E+01												1.72E+01		9.25E+00		2.22	2.22E-03	-2.65E+00	9.66E-01	5793	9.25E+00
	P1	32700000000
	P2	8320														Ea shift
	P3															-1.02E+03
>C(OO.)- | >CH-	T	Miyoshi 2011												T-dependence	Target	Final		1000/T	1/T	log(1/T)	log(>C(OO.)- | >CH-)	log(T)	Replicate
	200	2.80E-08												2.49E-09		4.10E-07		5.00	5.00E-03	-2.30E+00	-6.39E+00	A	2.33E-07
	225	2.85E-06												1.55E-07		1.45E-05		4.44	4.44E-03	-2.35E+00	-4.84E+00	8.23E+08	0.57
	250	1.15E-04												4.66E-06		2.76E-04		4.00	4.00E-03	-2.40E+00	-3.56E+00	Ea
	260	4.14E-04												1.55E-05		7.87E-04		3.85	3.85E-03	-2.41E+00	-3.10E+00	7.16E+03
	270	1.35E-03												4.79E-05		2.10E-03		3.70	3.70E-03	-2.43E+00	-2.68E+00		1.22
	280	4.07E-03												1.38E-04		5.29E-03		3.57	3.57E-03	-2.45E+00	-2.28E+00		6.45E-03
	290	1.13E-02												3.74E-04		1.26E-02		3.45	3.45E-03	-2.46E+00	-1.90E+00	-9.05E+00
	298	2.45E-02												7.97E-04	2.45E-02	2.45E-02		3.36	3.36E-03	-2.47E+00	-1.61E+00	-1.95E+03
	310	7.22E-02												2.33E-03		6.28E-02		3.23	3.23E-03	-2.49E+00	-1.20E+00	-1.75E+01
	320	1.67E-01												5.42E-03		1.32E-01		3.13	3.13E-03	-2.51E+00	-8.81E-01	#N/A
	330	3.67E-01												1.21E-02		2.66E-01		3.03	3.03E-03	-2.52E+00	-5.75E-01	#N/A
	340	7.71E-01												2.59E-02		5.21E-01		2.94	2.94E-03	-2.53E+00	-2.84E-01	A	5.21E-01
	350	1.55E+00												5.34E-02		9.87E-01		2.86	2.86E-03	-2.54E+00	-5.63E-03	3.47E-18	1.00
	375	7.57E+00												2.85E-01		4.34E+00		2.67	2.67E-03	-2.57E+00	6.37E-01	n
	400	3.03E+01												1.28E+00		1.64E+01		2.50	2.50E-03	-2.60E+00	1.22E+00	9.05
	425	1.03E+02												4.99E+00		5.51E+01		2.35	2.35E-03	-2.63E+00	1.74E+00	Ea	1.00
	450	3.05E+02												1.72E+01		1.66E+02		2.22	2.22E-03	-2.65E+00	2.22E+00	4493	1.66E+02
1,7 Hshift																Ea shift
	Average Temperature dependence															-2.33E+02
	T	-CH2OO. | -CH3	-CH2OO. | -CH2-	-CH2OO. | >CH-	>CHOO. | -CH3									T-dependence	Target	Final		1000/T	1/T	log(1/T)	log()	log(T)	Replicate
	200	1.91E-12	1.40E-09	3.34E-06	7.18E-11									8.95E-10		2.87E-09		5.00	5.00E-03	-2.30E+00	-8.54E+00	A	1.72E-09
	225	2.20E-10	1.12E-07	8.12E-05	4.43E-09									5.46E-08		1.54E-07		4.44	4.44E-03	-2.35E+00	-6.81E+00	1.84E+08	0.60
	250	1.08E-08	3.90E-06	1.15E-03	1.36E-07									1.60E-06		4.07E-06		4.00	4.00E-03	-2.40E+00	-5.39E+00	Ea
	260	4.24E-08	1.35E-05	2.96E-03	4.57E-07									5.27E-06		1.29E-05		3.85	3.85E-03	-2.41E+00	-4.89E+00	7.84E+03
	270	1.53E-07	4.30E-05	7.17E-03	1.43E-06									1.61E-05		3.81E-05		3.70	3.70E-03	-2.43E+00	-4.42E+00		1.20
	280	5.06E-07	1.27E-04	1.65E-02	4.17E-06									4.58E-05		1.05E-04		3.57	3.57E-03	-2.45E+00	-3.98E+00		1.26E-04
	290	1.56E-06	3.48E-04	3.63E-02	1.15E-05									1.23E-04		2.74E-04		3.45	3.45E-03	-2.46E+00	-3.56E+00	-8.19E+00
	298	3.67E-06	7.48E-04	6.61E-02	2.48E-05									2.59E-04	5.66E-04	5.66E-04		3.36	3.36E-03	-2.47E+00	-3.25E+00	-2.36E+03
	310	1.23E-05	2.20E-03	1.55E-01	7.42E-05									7.47E-04		1.58E-03		3.23	3.23E-03	-2.49E+00	-2.80E+00	-1.56E+01
	320	3.16E-05	5.11E-03	3.04E-01	1.76E-04									1.71E-03		3.55E-03		3.13	3.13E-03	-2.51E+00	-2.45E+00	#N/A
	330	7.76E-05	1.13E-02	5.76E-01	3.99E-04									3.77E-03		7.64E-03		3.03	3.03E-03	-2.52E+00	-2.12E+00	#N/A
	340	1.82E-04	2.40E-02	1.06E+00	8.72E-04									7.97E-03		1.58E-02		2.94	2.94E-03	-2.53E+00	-1.80E+00	A	1.58E-02
	350	4.09E-04	4.90E-02	1.90E+00	1.84E-03									1.63E-02		3.17E-02		2.86	2.86E-03	-2.54E+00	-1.50E+00	2.52E-16	1.00
	375	2.64E-03	2.51E-01	7.33E+00	1.03E-02									8.42E-02		1.57E-01		2.67	2.67E-03	-2.57E+00	-8.05E-01	n
	400	1.39E-02	1.07E+00	2.48E+01	4.91E-02									3.67E-01		6.57E-01		2.50	2.50E-03	-2.60E+00	-1.83E-01	8.19
	425	6.24E-02	3.89E+00	7.52E+01	2.02E-01									1.39E+00		2.40E+00		2.35	2.35E-03	-2.63E+00	3.80E-01	Ea	1.00
	450	2.43E-01	1.25E+01	2.08E+02	7.37E-01									4.64E+00		7.79E+00		2.22	2.22E-03	-2.65E+00	8.91E-01	5429	7.79E+00
	P1	19400000000	3100000000	1.47E-16
	P2	11610	1.5	8.21E+00												Ea shift
	P3		19.9	6807.64931090907												3.78E+02
-CH2OO. | -CH3	T	Miyoshi 2011	Sharma et al. 2010	Vereecken 2019										T-dependence	Target	Final		1000/T	1/T	log(1/T)	log(-CH2OO. | -CH3)	log(T)	Replicate
	200	1.19E-15	4.96E-14	1.91E-12										1.91E-12		2.88E-13		5.00	5.00E-03	-2.30E+00	-1.25E+01	A	1.72E-13
	225	7.55E-13	1.54E-11	2.20E-10										2.20E-10		4.10E-11		4.44	4.44E-03	-2.35E+00	-1.04E+01	1.24E+08	0.60
	250	1.32E-10	1.55E-09	1.08E-08										1.08E-08		2.38E-09		4.00	4.00E-03	-2.40E+00	-8.62E+00	Ea
	260	7.85E-10	7.67E-09	4.24E-08										4.24E-08		9.91E-09		3.85	3.85E-03	-2.41E+00	-8.00E+00	9.61E+03
	270	4.10E-09	3.38E-08	1.53E-07										1.53E-07		3.76E-08		3.70	3.70E-03	-2.43E+00	-7.42E+00		1.20
	280	1.91E-08	1.34E-07	5.06E-07										5.06E-07		1.31E-07		3.57	3.57E-03	-2.45E+00	-6.88E+00		1.57E-07
	290	7.96E-08	4.86E-07	1.56E-06										1.56E-06		4.24E-07		3.45	3.45E-03	-2.46E+00	-6.37E+00	-8.21E+00
	298	2.33E-07	1.28E-06	3.67E-06										3.67E-06	1.03E-06	1.03E-06		3.36	3.36E-03	-2.47E+00	-5.99E+00	-3.12E+03
	310	1.05E-06	4.99E-06	1.23E-05										1.23E-05		3.62E-06		3.23	3.23E-03	-2.49E+00	-5.44E+00	-1.58E+01
	320	3.40E-06	1.44E-05	3.16E-05										3.16E-05		9.71E-06		3.13	3.13E-03	-2.51E+00	-5.01E+00	#N/A
	330	1.02E-05	3.88E-05	7.76E-05										7.76E-05		2.47E-05		3.03	3.03E-03	-2.52E+00	-4.61E+00	#N/A
	340	2.87E-05	9.91E-05	1.82E-04										1.82E-04		5.98E-05		2.94	2.94E-03	-2.53E+00	-4.22E+00	A	5.98E-05
	350	7.61E-05	2.40E-04	4.09E-04										4.09E-04		1.39E-04		2.86	2.86E-03	-2.54E+00	-3.86E+00	1.47E-16	1.00
	375	6.95E-04	1.79E-03	2.64E-03										2.64E-03		9.62E-04		2.67	2.67E-03	-2.57E+00	-3.02E+00	n
	400	4.81E-03	1.05E-02	1.39E-02										1.39E-02		5.41E-03		2.50	2.50E-03	-2.60E+00	-2.27E+00	8.21
	425	2.65E-02	5.01E-02	6.24E-02										6.24E-02		2.56E-02		2.35	2.35E-03	-2.63E+00	-1.59E+00	Ea	1.00
	450	1.21E-01	2.02E-01	2.43E-01										2.43E-01		1.05E-01		2.22	2.22E-03	-2.65E+00	-9.80E-01	7186	1.05E-01
	P1	11900000000	1300000000	3.25E+10	3.25E+10	6.41E+09	1.10E-18	1260974038.28735
	P2	9700	1	1.06E+04	1.06E+04	1.18E+04	8.91E+00	0.283646954443283								Ea shift
	P3		18.2	8.12E+07	8.12E+07	8.39E+07	5.17E+03	8639.9045172246								6.28E+02
-CH2OO. | -CH2-	T	Miyoshi 2011	Sharma et al. 2010	Otkjaer et al. 2018	Otkjaer et al. 2018	Otkjaer et al. 2018	Vereecken 2019	Vereecken 2019						T-dependence	Target	Final		1000/T	1/T	log(1/T)	log(-CH2OO. | -CH2-)	log(T)	Replicate
	200	1.03E-11	3.35E-12				2.00E-09	9.82E-10						1.40E-09		6.05E-11		5.00	5.00E-03	-2.30E+00	-1.02E+01	A	4.54E-11
	225	2.25E-09	6.12E-10				1.01E-07	1.23E-07						1.12E-07		6.83E-09		4.44	4.44E-03	-2.35E+00	-8.17E+00	9.08E+08	0.75
	250	1.68E-07	3.98E-08				2.57E-06	5.91E-06						3.90E-06		3.16E-07		4.00	4.00E-03	-2.40E+00	-6.50E+00	Ea
	260	7.46E-07	1.69E-07				8.08E-06	2.26E-05						1.35E-05		1.20E-06		3.85	3.85E-03	-2.41E+00	-5.92E+00	8.89E+03
	270	2.97E-06	6.49E-07				2.36E-05	7.82E-05						4.30E-05		4.19E-06		3.70	3.70E-03	-2.43E+00	-5.38E+00		1.11
	280	1.07E-05	2.26E-06				6.48E-05	2.48E-04						1.27E-04		1.34E-05		3.57	3.57E-03	-2.45E+00	-4.87E+00		1.48E-05
	290	3.54E-05	7.23E-06	1.21E-04	1.21E-04	4.26E-07	1.67E-04	7.25E-04						3.48E-04		3.99E-05		3.45	3.45E-03	-2.46E+00	-4.40E+00	-4.59E+00
	298	8.69E-05	1.74E-05	2.49E-04	2.49E-04	9.70E-07	3.44E-04	1.63E-03						7.48E-04	9.08E-05	9.08E-05		3.36	3.36E-03	-2.47E+00	-4.04E+00	-3.27E+03
	310	3.06E-04	5.93E-05	7.01E-04	7.01E-04	3.15E-06	9.58E-04	5.05E-03						2.20E-03		2.90E-04		3.23	3.23E-03	-2.49E+00	-3.54E+00	-4.43E+00
	320	8.15E-04	1.54E-04	1.59E-03	1.59E-03	8.02E-06	2.14E-03	1.22E-02						5.11E-03		7.16E-04		3.13	3.13E-03	-2.51E+00	-3.14E+00	#N/A
	330	2.04E-03	3.79E-04				4.59E-03	2.78E-02						1.13E-02		1.68E-03		3.03	3.03E-03	-2.52E+00	-2.77E+00	#N/A
	340	4.85E-03	8.82E-04				9.51E-03	6.06E-02						2.40E-02		3.78E-03		2.94	2.94E-03	-2.53E+00	-2.42E+00	A	3.78E-03
	350	1.09E-02	1.96E-03				1.90E-02	1.26E-01						4.90E-02		8.14E-03		2.86	2.86E-03	-2.54E+00	-2.09E+00	3.72E-05	1.00
	375	6.95E-02	1.20E-02				9.41E-02	6.68E-01						2.51E-01		4.69E-02		2.67	2.67E-03	-2.57E+00	-1.33E+00	n
	400	3.50E-01	5.90E-02				3.96E-01	2.87E+00						1.07E+00		2.22E-01		2.50	2.50E-03	-2.60E+00	-6.55E-01	4.59
	425	1.46E+00	2.41E-01				1.45E+00	1.04E+01						3.89E+00		8.86E-01		2.35	2.35E-03	-2.63E+00	-5.23E-02	Ea	1.00
	450	5.18E+00	8.46E-01				4.75E+00	3.27E+01						1.25E+01		3.09E+00		2.22	2.22E-03	-2.65E+00	4.89E-01	7535	3.09E+00
	P1	5730000000	1100000000	2.94E+10	5.21E-11	1.07419307125744E-41	0.00740741880495
	P2	8.43E+03	1.1	9.67E+03	6.54E+00	16.2805725319656	4.10642408187749									Ea shift
	P3		14.3	8.09E+07	4482.57972181773	375.412961246719	6660.35488846064									3.79E+02
-CH2OO. | >CH-	T	Miyoshi 2011	Sharma et al. 2010	Otkjaer et al. 2018	Vereecken 2019	Vereecken 2019	Vereecken 2019							T-dependence	Target	Final		1000/T	1/T	log(1/T)	log(-CH2OO. | >CH-)	log(T)	Replicate
	200	2.84E-09	4.41E-08		1.09E-05	4.76E-05	7.18E-08							3.34E-06		5.03E-07		5.00	5.00E-03	-2.30E+00	-6.30E+00	A	2.87E-07
	225	3.07E-07	2.74E-06		2.85E-04	3.99E-04	4.71E-06							8.12E-05		1.51E-05		4.44	4.44E-03	-2.35E+00	-4.82E+00	2.30E+08	0.57
	250	1.30E-05	7.53E-05		4.16E-03	2.62E-03	1.40E-04							1.15E-03		2.53E-04		4.00	4.00E-03	-2.40E+00	-3.60E+00	Ea
	260	4.75E-05	2.38E-04		1.07E-02	5.26E-03	4.59E-04							2.96E-03		6.89E-04		3.85	3.85E-03	-2.41E+00	-3.16E+00	6.86E+03
	270	1.58E-04	6.92E-04		2.60E-02	1.03E-02	1.38E-03							7.17E-03		1.76E-03		3.70	3.70E-03	-2.43E+00	-2.75E+00		1.22
	280	4.82E-04	1.87E-03		5.96E-02	1.95E-02	3.87E-03							1.65E-02		4.27E-03		3.57	3.57E-03	-2.45E+00	-2.37E+00		5.20E-03
	290	1.36E-03	4.70E-03	2.68E-03	1.30E-01	3.62E-02	1.02E-02							3.63E-02		9.84E-03		3.45	3.45E-03	-2.46E+00	-2.01E+00	-8.98E+00
	298	2.97E-03	9.43E-03	5.05E-03	2.36E-01	5.83E-02	2.11E-02							6.61E-02	1.86E-02	1.86E-02		3.36	3.36E-03	-2.47E+00	-1.73E+00	-1.83E+03
	310	8.87E-03	2.51E-02	1.26E-02	5.46E-01	1.16E-01	5.88E-02							1.55E-01		4.58E-02		3.23	3.23E-03	-2.49E+00	-1.34E+00	-1.78E+01
	320	2.08E-02	5.37E-02	2.61E-02	1.06E+00	2.03E-01	1.31E-01							3.04E-01		9.31E-02		3.13	3.13E-03	-2.51E+00	-1.03E+00	#N/A
	330	4.61E-02	1.10E-01		1.98E+00	3.47E-01	2.80E-01							5.76E-01		1.83E-01		3.03	3.03E-03	-2.52E+00	-7.38E-01	#N/A
	340	9.78E-02	2.15E-01		3.58E+00	5.83E-01	5.72E-01							1.06E+00		3.48E-01		2.94	2.94E-03	-2.53E+00	-4.58E-01	A	3.48E-01
	350	1.99E-01	4.07E-01		6.31E+00	9.64E-01	1.13E+00							1.90E+00		6.44E-01		2.86	2.86E-03	-2.54E+00	-1.91E-01	1.61E-18	1.00
	375	9.89E-01	1.73E+00		2.33E+01	3.18E+00	5.32E+00							7.33E+00		2.67E+00		2.67	2.67E-03	-2.57E+00	4.27E-01	n
	400	4.03E+00	6.16E+00		7.49E+01	9.69E+00	2.11E+01							2.48E+01		9.63E+00		2.50	2.50E-03	-2.60E+00	9.84E-01	8.98
	425	1.39E+01	1.90E+01		2.15E+02	2.75E+01	7.19E+01							7.52E+01		3.09E+01		2.35	2.35E-03	-2.63E+00	1.49E+00	Ea	1.00
	450	4.19E+01	5.18E+01		5.63E+02	7.32E+01	2.17E+02							2.08E+02		8.95E+01		2.22	2.22E-03	-2.65E+00	1.95E+00	4218	8.95E+01
	P1	45300000000	4.57205109991858E-25
	P2	1.20E+04	10.9766338725493													Ea shift
	P3		5093.99920242372													7.79E+02
>CHOO. | -CH3	T	Miyoshi 2011	Vereecken 2019											T-dependence	Target	Final		1000/T	1/T	log(1/T)	log(>CHOO. | -CH3)	log(T)	Replicate
	200	3.41E-16	7.18E-11											7.18E-11		1.46E-12		5.00	5.00E-03	-2.30E+00	-1.18E+01	A	7.35E-13
	225	2.73E-13	4.43E-09											4.43E-09		1.39E-10		4.44	4.44E-03	-2.35E+00	-9.86E+00	4.40E+07	0.50
	250	5.73E-11	1.36E-07											1.36E-07		6.01E-09		4.00	4.00E-03	-2.40E+00	-8.22E+00	Ea
	260	3.64E-10	4.57E-07											4.57E-07		2.28E-08		3.85	3.85E-03	-2.41E+00	-7.64E+00	9.11E+03
	270	2.02E-09	1.43E-06											1.43E-06		7.97E-08		3.70	3.70E-03	-2.43E+00	-7.10E+00		1.27
	280	9.93E-09	4.17E-06											4.17E-06		2.58E-07		3.57	3.57E-03	-2.45E+00	-6.59E+00		3.29E-07
	290	4.37E-08	1.15E-05											1.15E-05		7.83E-07		3.45	3.45E-03	-2.46E+00	-6.11E+00	-1.10E+01
	298	1.33E-07	2.48E-05											2.48E-05	1.82E-06	1.82E-06		3.36	3.36E-03	-2.47E+00	-5.74E+00	-2.55E+03
	310	6.35E-07	7.42E-05											7.42E-05		6.01E-06		3.23	3.23E-03	-2.49E+00	-5.22E+00	-2.43E+01
	320	2.13E-06	1.76E-04											1.76E-04		1.54E-05		3.13	3.13E-03	-2.51E+00	-4.81E+00	#N/A
	330	6.67E-06	3.99E-04											3.99E-04		3.76E-05		3.03	3.03E-03	-2.52E+00	-4.42E+00	#N/A
	340	1.95E-05	8.72E-04											8.72E-04		8.82E-05		2.94	2.94E-03	-2.53E+00	-4.05E+00	A	8.82E-05
	350	5.36E-05	1.84E-03											1.84E-03		1.99E-04		2.86	2.86E-03	-2.54E+00	-3.70E+00	4.57E-25	1.00
	375	5.30E-04	1.03E-02											1.03E-02		1.30E-03		2.67	2.67E-03	-2.57E+00	-2.89E+00	n
	400	3.93E-03	4.91E-02											4.91E-02		7.00E-03		2.50	2.50E-03	-2.60E+00	-2.15E+00	10.98
	425	2.31E-02	2.02E-01											2.02E-01		3.23E-02		2.35	2.35E-03	-2.63E+00	-1.49E+00	Ea	1.00
	450	1.11E-01	7.37E-01											7.37E-01		1.30E-01		2.22	2.22E-03	-2.65E+00	-8.85E-01	5873	1.30E-01
	P1	27700000000
	P2	10400														Ea shift
	P3															7.74E+02
>CHOO. | -CH2-	T	Miyoshi 2011												T-dependence	Target	Final		1000/T	1/T	log(1/T)	log(>CHOO. | -CH2-)	log(T)	Replicate
	200	7.23E-13												8.95E-10		1.87E-11		5.00	5.00E-03	-2.30E+00	-1.07E+01	A	1.12E-11
	225	2.34E-10												5.46E-08		1.75E-09		4.44	4.44E-03	-2.35E+00	-8.76E+00	1.84E+08	0.60
	250	2.38E-08												1.60E-06		7.25E-08		4.00	4.00E-03	-2.40E+00	-7.14E+00	Ea
	260	1.18E-07												5.27E-06		2.69E-07		3.85	3.85E-03	-2.41E+00	-6.57E+00	8.85E+03
	270	5.18E-07												1.61E-05		9.17E-07		3.70	3.70E-03	-2.43E+00	-6.04E+00		1.20
	280	2.05E-06												4.58E-05		2.89E-06		3.57	3.57E-03	-2.45E+00	-5.54E+00		3.46E-06
	290	7.38E-06												1.23E-04		8.52E-06		3.45	3.45E-03	-2.46E+00	-5.07E+00	-8.19E+00
	298	1.93E-05												2.59E-04	1.93E-05	1.93E-05		3.36	3.36E-03	-2.47E+00	-4.71E+00	-2.79E+03
	310	7.46E-05												7.47E-04		6.16E-05		3.23	3.23E-03	-2.49E+00	-4.21E+00	-1.56E+01
	320	2.13E-04												1.71E-03		1.53E-04		3.13	3.13E-03	-2.51E+00	-3.82E+00	#N/A
	330	5.70E-04												3.77E-03		3.62E-04		3.03	3.03E-03	-2.52E+00	-3.44E+00	#N/A
	340	1.44E-03												7.97E-03		8.19E-04		2.94	2.94E-03	-2.53E+00	-3.09E+00	A	8.19E-04
	350	3.45E-03												1.63E-02		1.78E-03		2.86	2.86E-03	-2.54E+00	-2.75E+00	2.52E-16	1.00
	375	2.50E-02												8.42E-02		1.07E-02		2.67	2.67E-03	-2.57E+00	-1.97E+00	n
	400	1.42E-01												3.67E-01		5.30E-02		2.50	2.50E-03	-2.60E+00	-1.28E+00	8.19
	425	6.53E-01												1.39E+00		2.24E-01		2.35	2.35E-03	-2.63E+00	-6.49E-01	Ea	1.00
	450	2.54E+00												4.64E+00		8.31E-01		2.22	2.22E-03	-2.65E+00	-8.02E-02	6435	8.31E-01
	P1	16100000000
	P2	8900														Ea shift
	P3															-5.65E+02
>CHOO. | >CH-	T	Miyoshi 2011												T-dependence	Target	Final		1000/T	1/T	log(1/T)	log(>CHOO. | >CH-)	log(T)	Replicate
	200	7.60E-10												8.95E-10		1.51E-08		5.00	5.00E-03	-2.30E+00	-7.82E+00	A	9.02E-09
	225	1.07E-07												5.46E-08		6.71E-07		4.44	4.44E-03	-2.35E+00	-6.17E+00	1.84E+08	0.60
	250	5.57E-06												1.60E-06		1.53E-05		4.00	4.00E-03	-2.40E+00	-4.81E+00	Ea
	260	2.19E-05												5.27E-06		4.63E-05		3.85	3.85E-03	-2.41E+00	-4.33E+00	7.51E+03
	270	7.78E-05												1.61E-05		1.30E-04		3.70	3.70E-03	-2.43E+00	-3.89E+00		1.20
	280	2.53E-04												4.58E-05		3.44E-04		3.57	3.57E-03	-2.45E+00	-3.46E+00		4.12E-04
	290	7.56E-04												1.23E-04		8.60E-04		3.45	3.45E-03	-2.46E+00	-3.07E+00	-8.19E+00
	298	1.72E-03												2.59E-04	1.72E-03	1.72E-03		3.36	3.36E-03	-2.47E+00	-2.76E+00	-2.21E+03
	310	5.47E-03												7.47E-04		4.62E-03		3.23	3.23E-03	-2.49E+00	-2.34E+00	-1.56E+01
	320	1.34E-02												1.71E-03		1.00E-02		3.13	3.13E-03	-2.51E+00	-2.00E+00	#N/A
	330	3.12E-02												3.77E-03		2.09E-02		3.03	3.03E-03	-2.52E+00	-1.68E+00	#N/A
	340	6.89E-02												7.97E-03		4.20E-02		2.94	2.94E-03	-2.53E+00	-1.38E+00	A	4.20E-02
	350	1.46E-01												1.63E-02		8.17E-02		2.86	2.86E-03	-2.54E+00	-1.09E+00	2.52E-16	1.00
	375	7.94E-01												8.42E-02		3.79E-01		2.67	2.67E-03	-2.57E+00	-4.21E-01	n
	400	3.50E+00												3.67E-01		1.51E+00		2.50	2.50E-03	-2.60E+00	1.78E-01	8.19
	425	1.29E+01												1.39E+00		5.23E+00		2.35	2.35E-03	-2.63E+00	7.19E-01	Ea	1.00
	450	4.14E+01												4.64E+00		1.63E+01		2.22	2.22E-03	-2.65E+00	1.21E+00	5097	1.63E+01
	P1	28100000000
	P2	12530														Ea shift
	P3															2.90E+03
>C(OO.)- | -CH3	T	Miyoshi 2011												T-dependence	Target	Final		1000/T	1/T	log(1/T)	log(>C(OO.)- | -CH3)	log(T)	Replicate
	200	1.74E-17												8.95E-10		4.53E-16		5.00	5.00E-03	-2.30E+00	-1.53E+01	A	2.71E-16
	225	1.83E-14												5.46E-08		1.38E-13		4.44	4.44E-03	-2.35E+00	-1.29E+01	1.84E+08	0.60
	250	4.81E-12												1.60E-06		1.47E-11		4.00	4.00E-03	-2.40E+00	-1.08E+01	Ea
	260	3.30E-11												5.27E-06		7.57E-11		3.85	3.85E-03	-2.41E+00	-1.01E+01	1.10E+04
	270	1.97E-10												1.61E-05		3.49E-10		3.70	3.70E-03	-2.43E+00	-9.46E+00		1.20
	280	1.03E-09												4.58E-05		1.46E-09		3.57	3.57E-03	-2.45E+00	-8.84E+00		1.75E-09
	290	4.83E-09												1.23E-04		5.58E-09		3.45	3.45E-03	-2.46E+00	-8.25E+00	-8.19E+00
	298	1.54E-08												2.59E-04	1.54E-08	1.54E-08		3.36	3.36E-03	-2.47E+00	-7.81E+00	-3.72E+03
	310	7.85E-08												7.47E-04		6.48E-08		3.23	3.23E-03	-2.49E+00	-7.19E+00	-1.56E+01
	320	2.78E-07												1.71E-03		1.99E-07		3.13	3.13E-03	-2.51E+00	-6.70E+00	#N/A
	330	9.09E-07												3.77E-03		5.76E-07		3.03	3.03E-03	-2.52E+00	-6.24E+00	#N/A
	340	2.78E-06												7.97E-03		1.58E-06		2.94	2.94E-03	-2.53E+00	-5.80E+00	A	1.58E-06
	350	7.96E-06												1.63E-02		4.11E-06		2.86	2.86E-03	-2.54E+00	-5.39E+00	2.52E-16	1.00
	375	8.66E-05												8.42E-02		3.69E-05		2.67	2.67E-03	-2.57E+00	-4.43E+00	n
	400	6.99E-04												3.67E-01		2.61E-04		2.50	2.50E-03	-2.60E+00	-3.58E+00	8.19
	425	4.41E-03												1.39E+00		1.51E-03		2.35	2.35E-03	-2.63E+00	-2.82E+00	Ea	1.00
	450	2.27E-02												4.64E+00		7.38E-03		2.22	2.22E-03	-2.65E+00	-2.13E+00	8561	7.38E-03
	P1	19400000000
	P2	10740														Ea shift
	P3															1.22E+03
>C(OO.)- | -CH2-	T	Miyoshi 2011												T-dependence	Target	Final		1000/T	1/T	log(1/T)	log(>C(OO.)- | -CH2-)	log(T)	Replicate
	200	9.25E-14												8.95E-10		2.01E-12		5.00	5.00E-03	-2.30E+00	-1.17E+01	A	1.20E-12
	225	3.61E-11												5.46E-08		2.41E-10		4.44	4.44E-03	-2.35E+00	-9.62E+00	1.84E+08	0.60
	250	4.27E-09												1.60E-06		1.22E-08		4.00	4.00E-03	-2.40E+00	-7.91E+00	Ea
	260	2.23E-08												5.27E-06		4.84E-08		3.85	3.85E-03	-2.41E+00	-7.32E+00	9.29E+03
	270	1.03E-07												1.61E-05		1.76E-07		3.70	3.70E-03	-2.43E+00	-6.76E+00		1.20
	280	4.26E-07												4.58E-05		5.88E-07		3.57	3.57E-03	-2.45E+00	-6.23E+00		7.04E-07
	290	1.60E-06												1.23E-04		1.83E-06		3.45	3.45E-03	-2.46E+00	-5.74E+00	-8.19E+00
	298	4.32E-06												2.59E-04	4.32E-06	4.32E-06		3.36	3.36E-03	-2.47E+00	-5.36E+00	-2.99E+03
	310	1.74E-05												7.47E-04		1.46E-05		3.23	3.23E-03	-2.49E+00	-4.84E+00	-1.56E+01
	320	5.15E-05												1.71E-03		3.79E-05		3.13	3.13E-03	-2.51E+00	-4.42E+00	#N/A
	330	1.42E-04												3.77E-03		9.35E-05		3.03	3.03E-03	-2.52E+00	-4.03E+00	#N/A
	340	3.71E-04												7.97E-03		2.21E-04		2.94	2.94E-03	-2.53E+00	-3.66E+00	A	2.21E-04
	350	9.14E-04												1.63E-02		4.99E-04		2.86	2.86E-03	-2.54E+00	-3.30E+00	2.52E-16	1.00
	375	7.07E-03												8.42E-02		3.25E-03		2.67	2.67E-03	-2.57E+00	-2.49E+00	n
	400	4.24E-02												3.67E-01		1.74E-02		2.50	2.50E-03	-2.60E+00	-1.76E+00	8.19
	425	2.06E-01												1.39E+00		7.86E-02		2.35	2.35E-03	-2.63E+00	-1.10E+00	Ea	1.00
	450	8.37E-01												4.64E+00		3.08E-01		2.22	2.22E-03	-2.65E+00	-5.11E-01	6882	3.08E-01
	P1	10200000000
	P2	9260														Ea shift
	P3															-6.87E+01
>C(OO.)- | >CH-	T	Miyoshi 2011												T-dependence	Target	Final		1000/T	1/T	log(1/T)	log(>C(OO.)- | >CH-)	log(T)	Replicate
	200	7.96E-11												8.95E-10		1.26E-09		5.00	5.00E-03	-2.30E+00	-8.90E+00	A	7.56E-10
	225	1.36E-08												5.46E-08		7.40E-08		4.44	4.44E-03	-2.35E+00	-7.13E+00	1.84E+08	0.60
	250	8.36E-07												1.60E-06		2.11E-06		4.00	4.00E-03	-2.40E+00	-5.68E+00	Ea
	260	3.48E-06												5.27E-06		6.87E-06		3.85	3.85E-03	-2.41E+00	-5.16E+00	8.01E+03
	270	1.30E-05												1.61E-05		2.08E-05		3.70	3.70E-03	-2.43E+00	-4.68E+00		1.20
	280	4.42E-05												4.58E-05		5.86E-05		3.57	3.57E-03	-2.45E+00	-4.23E+00		7.01E-05
	290	1.38E-04												1.23E-04		1.56E-04		3.45	3.45E-03	-2.46E+00	-3.81E+00	-8.19E+00
	298	3.26E-04												2.59E-04	3.26E-04	3.26E-04		3.36	3.36E-03	-2.47E+00	-3.49E+00	-2.43E+03
	310	1.09E-03												7.47E-04		9.32E-04		3.23	3.23E-03	-2.49E+00	-3.03E+00	-1.56E+01
	320	2.76E-03												1.71E-03		2.12E-03		3.13	3.13E-03	-2.51E+00	-2.67E+00	#N/A
	330	6.64E-03												3.77E-03		4.64E-03		3.03	3.03E-03	-2.52E+00	-2.33E+00	#N/A
	340	1.52E-02												7.97E-03		9.76E-03		2.94	2.94E-03	-2.53E+00	-2.01E+00	A	9.76E-03
	350	3.30E-02												1.63E-02		1.98E-02		2.86	2.86E-03	-2.54E+00	-1.70E+00	2.52E-16	1.00
	375	1.92E-01												8.42E-02		1.01E-01		2.67	2.67E-03	-2.57E+00	-9.95E-01	n
	400	9.01E-01												3.67E-01		4.36E-01		2.50	2.50E-03	-2.60E+00	-3.61E-01	8.19
	425	3.52E+00												1.39E+00		1.63E+00		2.35	2.35E-03	-2.63E+00	2.12E-01	Ea	1.00
	450	1.18E+01												4.64E+00		5.40E+00		2.22	2.22E-03	-2.65E+00	7.33E-01	5593	5.40E+00
1,8 Hshift
	Average Temperature dependence															0.00E+00
	T	-CH2OO. | -CH3	-CH2OO. | -CH2-	-CH2OO. | >CH-										T-dependence	Target	Final		1000/T	1/T	log(1/T)	log()	log(T)	Replicate
	200	4.13E-14	3.80E-12	2.28E-15										7.10E-14		7.10E-14		5.00	5.00E-03	-2.30E+00	-1.31E+01	A	4.26E-14
	225	4.64E-12	5.78E-10	4.56E-13										1.07E-11		1.07E-11		4.44	4.44E-03	-2.35E+00	-1.10E+01	4.98E+07	0.60
	250	2.30E-10	3.33E-08	3.53E-11										6.47E-10		6.47E-10		4.00	4.00E-03	-2.40E+00	-9.19E+00	Ea
	260	9.19E-10	1.37E-07	1.64E-10										2.74E-09		2.74E-09		3.85	3.85E-03	-2.41E+00	-8.56E+00	9.70E+03
	270	3.36E-09	5.07E-07	6.86E-10										1.05E-08		1.05E-08		3.70	3.70E-03	-2.43E+00	-7.98E+00		1.20
	280	1.14E-08	1.72E-06	2.63E-09										3.72E-08		3.72E-08		3.57	3.57E-03	-2.45E+00	-7.43E+00		4.45E-08
	290	3.59E-08	5.38E-06	9.33E-09										1.22E-07		1.22E-07		3.45	3.45E-03	-2.46E+00	-6.91E+00	-8.18E+00
	298	8.60E-08	1.27E-05	2.44E-08										2.99E-07	2.99E-07	2.99E-07		3.36	3.36E-03	-2.47E+00	-6.52E+00	-3.17E+03
	310	2.97E-07	4.27E-05	9.48E-08										1.06E-06		1.06E-06		3.23	3.23E-03	-2.49E+00	-5.97E+00	-1.61E+01
	320	7.88E-07	1.10E-04	2.75E-07										2.88E-06		2.88E-06		3.13	3.13E-03	-2.51E+00	-5.54E+00	#N/A
	330	1.99E-06	2.67E-04	7.56E-07										7.38E-06		7.38E-06		3.03	3.03E-03	-2.52E+00	-5.13E+00	#N/A
	340	4.81E-06	6.17E-04	1.98E-06										1.80E-05		1.80E-05		2.94	2.94E-03	-2.53E+00	-4.74E+00	A	1.80E-05
	350	1.12E-05	1.37E-03	4.93E-06										4.22E-05		4.22E-05		2.86	2.86E-03	-2.54E+00	-4.37E+00	7.49E-17	1.00
	375	7.82E-05	8.34E-03	4.04E-05										2.98E-04		2.98E-04		2.67	2.67E-03	-2.57E+00	-3.53E+00	n
	400	4.50E-04	4.11E-02	2.66E-04										1.70E-03		1.70E-03		2.50	2.50E-03	-2.60E+00	-2.77E+00	8.18
	425	2.20E-03	1.70E-01	1.45E-03										8.16E-03		8.16E-03		2.35	2.35E-03	-2.63E+00	-2.09E+00	Ea	1.00
	450	9.33E-03	6.07E-01	6.81E-03										3.38E-02		3.38E-02		2.22	2.22E-03	-2.65E+00	-1.47E+00	7293	3.38E-02
	P1	1220000000	4.72980135481287E-25	3.20E-29
	P2	12440	10.7009093395004	1.21E+01												Ea shift
	P3		6488.75246815018	5678.22749389422												0.00E+00
-CH2OO. | -CH3	T	Miyoshi 2011	Vereecken 2019	Vereecken 2019										T-dependence	Target	Final		1000/T	1/T	log(1/T)	log(-CH2OO. | -CH3)	log(T)	Replicate
	200	1.18E-18	1.61E-14	1.06E-13										4.13E-14		4.13E-14		5.00	5.00E-03	-2.30E+00	-1.34E+01	A	2.02E-14
	225	1.19E-15	2.09E-12	1.03E-11										4.64E-12		4.64E-12		4.44	4.44E-03	-2.35E+00	-1.13E+01	6.48E+06	0.49
	250	2.99E-13	1.16E-10	4.59E-10										2.30E-10		2.30E-10		4.00	4.00E-03	-2.40E+00	-9.64E+00	Ea
	260	2.03E-12	4.77E-10	1.77E-09										9.19E-10		9.19E-10		3.85	3.85E-03	-2.41E+00	-9.04E+00	9.44E+03
	270	1.19E-11	1.80E-09	6.27E-09										3.36E-09		3.36E-09		3.70	3.70E-03	-2.43E+00	-8.47E+00		1.28
	280	6.18E-11	6.27E-09	2.06E-08										1.14E-08		1.14E-08		3.57	3.57E-03	-2.45E+00	-7.94E+00		1.46E-08
	290	2.86E-10	2.03E-08	6.35E-08										3.59E-08		3.59E-08		3.45	3.45E-03	-2.46E+00	-7.44E+00	-1.14E+01
	298	9.05E-10	4.95E-08	1.49E-07										8.60E-08	8.60E-08	8.60E-08		3.36	3.36E-03	-2.47E+00	-7.07E+00	-2.64E+03
	310	4.56E-09	1.75E-07	5.04E-07										2.97E-07		2.97E-07		3.23	3.23E-03	-2.49E+00	-6.53E+00	-2.64E+01
	320	1.60E-08	4.74E-07	1.31E-06										7.88E-07		7.88E-07		3.13	3.13E-03	-2.51E+00	-6.10E+00	#N/A
	330	5.19E-08	1.22E-06	3.26E-06										1.99E-06		1.99E-06		3.03	3.03E-03	-2.52E+00	-5.70E+00	#N/A
	340	1.57E-07	2.99E-06	7.75E-06										4.81E-06		4.81E-06		2.94	2.94E-03	-2.53E+00	-5.32E+00	A	4.81E-06
	350	4.47E-07	7.03E-06	1.77E-05										1.12E-05		1.12E-05		2.86	2.86E-03	-2.54E+00	-4.95E+00	3.89E-27	1.00
	375	4.78E-06	5.06E-05	1.21E-04										7.82E-05		7.82E-05		2.67	2.67E-03	-2.57E+00	-4.11E+00	n
	400	3.80E-05	2.98E-04	6.79E-04										4.50E-04		4.50E-04		2.50	2.50E-03	-2.60E+00	-3.35E+00	11.40
	425	2.37E-04	1.48E-03	3.26E-03										2.20E-03		2.20E-03		2.35	2.35E-03	-2.63E+00	-2.66E+00	Ea	1.00
	450	1.20E-03	6.37E-03	1.37E-02										9.33E-03		9.33E-03		2.22	2.22E-03	-2.65E+00	-2.03E+00	6083	9.33E-03
	P1	825000000	5.63E+09	6.83E-01
	P2	10880	1.20E+04	3.04E+00												Ea shift
	P3		9.79E+07	8.40E+03												7.50E+02
-CH2OO. | -CH2-	T	Miyoshi 2011	Otkjaer et al. 2018	Vereecken 2019										T-dependence	Target	Final		1000/T	1/T	log(1/T)	log(-CH2OO. | -CH2-)	log(T)	Replicate
	200	1.95E-15		3.80E-12										3.80E-12		8.93E-14		5.00	5.00E-03	-2.30E+00	-1.30E+01	A	7.39E-14
	225	8.24E-13		5.78E-10										5.78E-10		2.06E-11		4.44	4.44E-03	-2.35E+00	-1.07E+01	4.80E+08	0.83
	250	1.04E-10		3.33E-08										3.33E-08		1.66E-09		4.00	4.00E-03	-2.40E+00	-8.78E+00	Ea
	260	5.53E-10		1.37E-07										1.37E-07		7.63E-09		3.85	3.85E-03	-2.41E+00	-8.12E+00	1.00E+04
	270	2.61E-09		5.07E-07										5.07E-07		3.15E-08		3.70	3.70E-03	-2.43E+00	-7.50E+00		1.07
	280	1.10E-08		1.72E-06										1.72E-06		1.18E-07		3.57	3.57E-03	-2.45E+00	-6.93E+00		1.26E-07
	290	4.20E-08	3.33E-07	5.38E-06										5.38E-06		4.05E-07		3.45	3.45E-03	-2.46E+00	-6.39E+00	-3.04E+00
	298	1.15E-07	7.39E-07	1.27E-05										1.27E-05	1.03E-06	1.03E-06		3.36	3.36E-03	-2.47E+00	-5.99E+00	-3.97E+03
	310	4.72E-07	2.32E-06	4.27E-05										4.27E-05		3.80E-06		3.23	3.23E-03	-2.49E+00	-5.42E+00	-1.66E-01
	320	1.41E-06	5.78E-06	1.10E-04										1.10E-04		1.05E-05		3.13	3.13E-03	-2.51E+00	-4.98E+00	#N/A
	330	3.96E-06		2.67E-04										2.67E-04		2.75E-05		3.03	3.03E-03	-2.52E+00	-4.56E+00	#N/A
	340	1.04E-05		6.17E-04										6.17E-04		6.80E-05		2.94	2.94E-03	-2.53E+00	-4.17E+00	A	6.80E-05
	350	2.61E-05		1.37E-03										1.37E-03		1.60E-04		2.86	2.86E-03	-2.54E+00	-3.80E+00	6.83E-01	1.00
	375	2.07E-04		8.34E-03										8.34E-03		1.13E-03		2.67	2.67E-03	-2.57E+00	-2.95E+00	n
	400	1.27E-03		4.11E-02										4.11E-02		6.31E-03		2.50	2.50E-03	-2.60E+00	-2.20E+00	3.04
	425	6.29E-03		1.70E-01										1.70E-01		2.91E-02		2.35	2.35E-03	-2.63E+00	-1.54E+00	Ea	1.00
	450	2.61E-02		6.07E-01										6.07E-01		1.15E-01		2.22	2.22E-03	-2.65E+00	-9.41E-01	9150	1.15E-01
	P1	1.58E-22
	P2	1.01E+01														Ea shift
	P3	7394.87377608764														0.00E+00
-CH2OO. | >CH-	T	Vereecken 2019												T-dependence	Target	Final		1000/T	1/T	log(1/T)	log(-CH2OO. | >CH-)	log(T)	Replicate
	200	2.28E-15												2.28E-15		2.28E-15		5.00	5.00E-03	-2.30E+00	-1.46E+01	A	1.21E-15
	225	4.56E-13												4.56E-13		4.56E-13		4.44	4.44E-03	-2.35E+00	-1.23E+01	3.96E+07	0.53
	250	3.53E-11												3.53E-11		3.53E-11		4.00	4.00E-03	-2.40E+00	-1.05E+01	Ea
	260	1.64E-10												1.64E-10		1.64E-10		3.85	3.85E-03	-2.41E+00	-9.79E+00	1.04E+04
	270	6.86E-10												6.86E-10		6.86E-10		3.70	3.70E-03	-2.43E+00	-9.16E+00		1.25
	280	2.63E-09												2.63E-09		2.63E-09		3.57	3.57E-03	-2.45E+00	-8.58E+00		3.29E-09
	290	9.33E-09												9.33E-09		9.33E-09		3.45	3.45E-03	-2.46E+00	-8.03E+00	-1.01E+01
	298	2.44E-08												2.44E-08	2.44E-08	2.44E-08		3.36	3.36E-03	-2.47E+00	-7.61E+00	-3.21E+03
	310	9.48E-08												9.48E-08		9.48E-08		3.23	3.23E-03	-2.49E+00	-7.02E+00	-2.18E+01
	320	2.75E-07												2.75E-07		2.75E-07		3.13	3.13E-03	-2.51E+00	-6.56E+00	#N/A
	330	7.56E-07												7.56E-07		7.56E-07		3.03	3.03E-03	-2.52E+00	-6.12E+00	#N/A
	340	1.98E-06												1.98E-06		1.98E-06		2.94	2.94E-03	-2.53E+00	-5.70E+00	A	1.98E-06
	350	4.93E-06												4.93E-06		4.93E-06		2.86	2.86E-03	-2.54E+00	-5.31E+00	1.58E-22	1.00
	375	4.04E-05												4.04E-05		4.04E-05		2.67	2.67E-03	-2.57E+00	-4.39E+00	n
	400	2.66E-04												2.66E-04		2.66E-04		2.50	2.50E-03	-2.60E+00	-3.58E+00	10.09
	425	1.45E-03												1.45E-03		1.45E-03		2.35	2.35E-03	-2.63E+00	-2.84E+00	Ea	1.00
	450	6.81E-03												6.81E-03		6.81E-03		2.22	2.22E-03	-2.65E+00	-2.17E+00	7395	6.81E-03
	P1	2260000000
	P2	12910														Ea shift
	P3															2.01E+03
>CHOO. | -CH3	T	Miyoshi 2011												T-dependence	Target	Final		1000/T	1/T	log(1/T)	log(>CHOO. | -CH3)	log(T)	Replicate
	200	2.09E-19												7.10E-14		3.00E-18		5.00	5.00E-03	-2.30E+00	-1.75E+01	A	1.80E-18
	225	2.72E-16												1.07E-11		1.38E-15		4.44	4.44E-03	-2.35E+00	-1.49E+01	4.98E+07	0.60
	250	8.46E-14												6.47E-10		2.05E-13		4.00	4.00E-03	-2.40E+00	-1.27E+01	Ea
	260	6.16E-13												2.74E-09		1.18E-12		3.85	3.85E-03	-2.41E+00	-1.19E+01	1.17E+04
	270	3.88E-12												1.05E-08		6.06E-12		3.70	3.70E-03	-2.43E+00	-1.12E+01		1.20
	280	2.14E-11												3.72E-08		2.79E-11		3.57	3.57E-03	-2.45E+00	-1.06E+01		3.34E-11
	290	1.05E-10												1.22E-07		1.17E-10		3.45	3.45E-03	-2.46E+00	-9.93E+00	-8.18E+00
	298	3.46E-10												2.99E-07	3.46E-10	3.46E-10		3.36	3.36E-03	-2.47E+00	-9.46E+00	-4.04E+03
	310	1.85E-09												1.06E-06		1.60E-09		3.23	3.23E-03	-2.49E+00	-8.80E+00	-1.61E+01
	320	6.81E-09												2.88E-06		5.31E-09		3.13	3.13E-03	-2.51E+00	-8.28E+00	#N/A
	330	2.31E-08												7.38E-06		1.65E-08		3.03	3.03E-03	-2.52E+00	-7.78E+00	#N/A
	340	7.31E-08												1.80E-05		4.82E-08		2.94	2.94E-03	-2.53E+00	-7.32E+00	A	4.82E-08
	350	2.16E-07												4.22E-05		1.34E-07		2.86	2.86E-03	-2.54E+00	-6.87E+00	7.49E-17	1.00
	375	2.53E-06												2.98E-04		1.38E-06		2.67	2.67E-03	-2.57E+00	-5.86E+00	n
	400	2.17E-05												1.70E-03		1.11E-05		2.50	2.50E-03	-2.60E+00	-4.96E+00	8.18
	425	1.45E-04												8.16E-03		7.13E-05		2.35	2.35E-03	-2.63E+00	-4.15E+00	Ea	1.00
	450	7.85E-04												3.38E-02		3.84E-04		2.22	2.22E-03	-2.65E+00	-3.42E+00	9307	3.84E-04
	P1	1500000000
	P2	11250														Ea shift
	P3															4.76E+02
>CHOO. | -CH2-	T	Miyoshi 2011												T-dependence	Target	Final		1000/T	1/T	log(1/T)	log(>CHOO. | -CH2-)	log(T)	Replicate
	200	5.59E-16												7.10E-14		6.56E-15		5.00	5.00E-03	-2.30E+00	-1.42E+01	A	3.93E-15
	225	2.89E-13												1.07E-11		1.29E-12		4.44	4.44E-03	-2.35E+00	-1.19E+01	4.98E+07	0.60
	250	4.29E-11												6.47E-10		9.62E-11		4.00	4.00E-03	-2.40E+00	-1.00E+01	Ea
	260	2.42E-10												2.74E-09		4.38E-10		3.85	3.85E-03	-2.41E+00	-9.36E+00	1.02E+04
	270	1.20E-09												1.05E-08		1.80E-09		3.70	3.70E-03	-2.43E+00	-8.74E+00		1.20
	280	5.33E-09												3.72E-08		6.79E-09		3.57	3.57E-03	-2.45E+00	-8.17E+00		8.12E-09
	290	2.13E-08												1.22E-07		2.35E-08		3.45	3.45E-03	-2.46E+00	-7.63E+00	-8.18E+00
	298	6.04E-08												2.99E-07	6.04E-08	6.04E-08		3.36	3.36E-03	-2.47E+00	-7.22E+00	-3.37E+03
	310	2.60E-07												1.06E-06		2.29E-07		3.23	3.23E-03	-2.49E+00	-6.64E+00	-1.61E+01
	320	8.09E-07												2.88E-06		6.49E-07		3.13	3.13E-03	-2.51E+00	-6.19E+00	#N/A
	330	2.35E-06												7.38E-06		1.74E-06		3.03	3.03E-03	-2.52E+00	-5.76E+00	#N/A
	340	6.40E-06												1.80E-05		4.44E-06		2.94	2.94E-03	-2.53E+00	-5.35E+00	A	4.44E-06
	350	1.65E-05												4.22E-05		1.08E-05		2.86	2.86E-03	-2.54E+00	-4.97E+00	7.49E-17	1.00
	375	1.40E-04												2.98E-04		8.35E-05		2.67	2.67E-03	-2.57E+00	-4.08E+00	n
	400	9.15E-04												1.70E-03		5.17E-04		2.50	2.50E-03	-2.60E+00	-3.29E+00	8.18
	425	4.79E-03												8.16E-03		2.66E-03		2.35	2.35E-03	-2.63E+00	-2.58E+00	Ea	1.00
	450	2.08E-02												3.38E-02		1.17E-02		2.22	2.22E-03	-2.65E+00	-1.93E+00	7769	1.17E-02

## Sheet: Plot exo-O2R=C
Unsaturated RO2 with exo-cyclic double bond
1,4 Hshift
	Average temperature dependence															Ea shift
																0.00E+00
	T	-CH2OO. | -CH2-												T-dependence	Target	Final		1000/T	1/T	log(1/T)	log()	log(T)	Replicate
	200	1.53E-12												1.53E-12		1.53E-12		5.00	5.00E-03	-2.30E+00	-1.18E+01	A	1.30E-12
	225	3.41E-10												3.41E-10		3.41E-10		4.44	4.44E-03	-2.35E+00	-9.47E+00	5.35E+09	0.85
	250	2.66E-08												2.66E-08		2.66E-08		4.00	4.00E-03	-2.40E+00	-7.57E+00	Ea
	260	1.21E-07												1.21E-07		1.21E-07		3.85	3.85E-03	-2.41E+00	-6.92E+00	9.95E+03
	270	4.95E-07												4.95E-07		4.95E-07		3.70	3.70E-03	-2.43E+00	-6.31E+00		1.06
	280	1.83E-06												1.83E-06		1.83E-06		3.57	3.57E-03	-2.45E+00	-5.74E+00		1.94E-06
	290	6.22E-06												6.22E-06		6.22E-06		3.45	3.45E-03	-2.46E+00	-5.21E+00	-2.65E+00
	298	1.56E-05												1.56E-05	1.56E-05	1.56E-05		3.36	3.36E-03	-2.47E+00	-4.81E+00	-3.98E+03
	310	5.72E-05												5.72E-05		5.72E-05		3.23	3.23E-03	-2.49E+00	-4.24E+00	1.99E+00
	320	1.57E-04												1.57E-04		1.57E-04		3.13	3.13E-03	-2.51E+00	-3.80E+00	#N/A
	330	4.06E-04												4.06E-04		4.06E-04		3.03	3.03E-03	-2.52E+00	-3.39E+00	#N/A
	340	9.94E-04												9.94E-04		9.94E-04		2.94	2.94E-03	-2.53E+00	-3.00E+00	A	9.94E-04
	350	2.32E-03												2.32E-03		2.32E-03		2.86	2.86E-03	-2.54E+00	-2.63E+00	9.82E+01	1.00
	375	1.60E-02												1.60E-02		1.60E-02		2.67	2.67E-03	-2.57E+00	-1.80E+00	n
	400	8.75E-02												8.75E-02		8.75E-02		2.50	2.50E-03	-2.60E+00	-1.06E+00	2.65
	425	3.96E-01												3.96E-01		3.96E-01		2.35	2.35E-03	-2.63E+00	-4.02E-01	Ea	1.00
	450	1.53E+00												1.53E+00		1.53E+00		2.22	2.22E-03	-2.65E+00	1.85E-01	9172	1.53E+00
		s
	P1	9.82E+01
	P2	2.655														Ea shift
	P3	9.17E+03														0.00E+00
-CH2OO. | -CH2-	T	Zhang and Dibble 2011												T-dependence	Target	Final		1000/T	1/T	log(1/T)	log(-CH2OO. | -CH2-)	log(T)	Replicate
	200	1.53E-12												1.53E-12		1.53E-12		5.00	5.00E-03	-2.30E+00	-1.18E+01	A	1.30E-12
	225	3.41E-10												3.41E-10		3.41E-10		4.44	4.44E-03	-2.35E+00	-9.47E+00	5.35E+09	0.85
	250	2.66E-08												2.66E-08		2.66E-08		4.00	4.00E-03	-2.40E+00	-7.57E+00	Ea
	260	1.21E-07												1.21E-07		1.21E-07		3.85	3.85E-03	-2.41E+00	-6.92E+00	9.95E+03
	270	4.95E-07												4.95E-07		4.95E-07		3.70	3.70E-03	-2.43E+00	-6.31E+00		1.06
	280	1.83E-06												1.83E-06		1.83E-06		3.57	3.57E-03	-2.45E+00	-5.74E+00		1.94E-06
	290	6.22E-06												6.22E-06		6.22E-06		3.45	3.45E-03	-2.46E+00	-5.21E+00	-2.65E+00
	298	1.56E-05												1.56E-05	1.56E-05	1.56E-05		3.36	3.36E-03	-2.47E+00	-4.81E+00	-3.98E+03
	310	5.72E-05												5.72E-05		5.72E-05		3.23	3.23E-03	-2.49E+00	-4.24E+00	1.99E+00
	320	1.57E-04												1.57E-04		1.57E-04		3.13	3.13E-03	-2.51E+00	-3.80E+00	#N/A
	330	4.06E-04												4.06E-04		4.06E-04		3.03	3.03E-03	-2.52E+00	-3.39E+00	#N/A
	340	9.94E-04												9.94E-04		9.94E-04		2.94	2.94E-03	-2.53E+00	-3.00E+00	A	9.94E-04
	350	2.32E-03												2.32E-03		2.32E-03		2.86	2.86E-03	-2.54E+00	-2.63E+00	9.82E+01	1.00
	375	1.60E-02												1.60E-02		1.60E-02		2.67	2.67E-03	-2.57E+00	-1.80E+00	n
	400	8.75E-02												8.75E-02		8.75E-02		2.50	2.50E-03	-2.60E+00	-1.06E+00	2.65
	425	3.96E-01												3.96E-01		3.96E-01		2.35	2.35E-03	-2.63E+00	-4.02E-01	Ea	1.00
	450	1.53E+00												1.53E+00		1.53E+00		2.22	2.22E-03	-2.65E+00	1.85E-01	9172	1.53E+00
		p
	P1	2.42E+12
	P2	1.45E+04														Ea shift
	P3	2.88E+08												use average		-5.38E+02
-CH2OO. | >CH-	T	Otkjaer et al. 2018												T-dependence	Target	Final		1000/T	1/T	log(1/T)	log(-CH2OO. | >CH-)	log(T)	Replicate
	200													1.53E-12		2.25E-11		5.00	5.00E-03	-2.30E+00	-1.06E+01	A	1.91E-11
	225													3.41E-10		3.73E-09		4.44	4.44E-03	-2.35E+00	-8.43E+00	5.35E+09	0.85
	250													2.66E-08		2.29E-07		4.00	4.00E-03	-2.40E+00	-6.64E+00	Ea
	260													1.21E-07		9.60E-07		3.85	3.85E-03	-2.41E+00	-6.02E+00	9.42E+03
	270													4.95E-07		3.63E-06		3.70	3.70E-03	-2.43E+00	-5.44E+00		1.06
	280													1.83E-06		1.25E-05		3.57	3.57E-03	-2.45E+00	-4.90E+00		1.33E-05
	290	6.27E-05												6.22E-06		3.98E-05		3.45	3.45E-03	-2.46E+00	-4.40E+00	-2.65E+00
	298	9.52E-05												1.56E-05	9.52E-05	9.52E-05		3.36	3.36E-03	-2.47E+00	-4.02E+00	-3.75E+03
	310	1.86E-04												5.72E-05		3.24E-04		3.23	3.23E-03	-2.49E+00	-3.49E+00	1.99E+00
	320	3.33E-04												1.57E-04		8.43E-04		3.13	3.13E-03	-2.51E+00	-3.07E+00	#N/A
	330													4.06E-04		2.07E-03		3.03	3.03E-03	-2.52E+00	-2.68E+00	#N/A
	340													9.94E-04		4.84E-03		2.94	2.94E-03	-2.53E+00	-2.32E+00	A	4.84E-03
	350													2.32E-03		1.08E-02		2.86	2.86E-03	-2.54E+00	-1.97E+00	9.82E+01	1.00
	375													1.60E-02		6.72E-02		2.67	2.67E-03	-2.57E+00	-1.17E+00	n
	400													8.75E-02		3.36E-01		2.50	2.50E-03	-2.60E+00	-4.74E-01	2.65
	425													3.96E-01		1.41E+00		2.35	2.35E-03	-2.63E+00	1.48E-01	Ea	1.00
	450													1.53E+00		5.06E+00		2.22	2.22E-03	-2.65E+00	7.04E-01	8634	5.06E+00
	P1
	P2															Ea shift
	P3															2.10E+02
>CHOO. | -CH2-	T													T-dependence	Target	Final		1000/T	1/T	log(1/T)	log(>CHOO. | -CH2-)	log(T)	Replicate
	200													1.53E-12		5.35E-13		5.00	5.00E-03	-2.30E+00	-1.23E+01	A	4.53E-13
	225													3.41E-10		1.34E-10		4.44	4.44E-03	-2.35E+00	-9.87E+00	5.35E+09	0.85
	250													2.66E-08		1.15E-08		4.00	4.00E-03	-2.40E+00	-7.94E+00	Ea
	260													1.21E-07		5.40E-08		3.85	3.85E-03	-2.41E+00	-7.27E+00	1.02E+04
	270													4.95E-07		2.27E-07		3.70	3.70E-03	-2.43E+00	-6.64E+00		1.06
	280													1.83E-06		8.65E-07		3.57	3.57E-03	-2.45E+00	-6.06E+00		9.17E-07
	290													6.22E-06		3.01E-06		3.45	3.45E-03	-2.46E+00	-5.52E+00	-2.65E+00
	298													1.56E-05	7.72E-06	7.72E-06		3.36	3.36E-03	-2.47E+00	-5.11E+00	-4.07E+03
	310													5.72E-05		2.90E-05		3.23	3.23E-03	-2.49E+00	-4.54E+00	1.99E+00
	320													1.57E-04		8.13E-05		3.13	3.13E-03	-2.51E+00	-4.09E+00	#N/A
	330													4.06E-04		2.14E-04		3.03	3.03E-03	-2.52E+00	-3.67E+00	#N/A
	340													9.94E-04		5.36E-04		2.94	2.94E-03	-2.53E+00	-3.27E+00	A	5.36E-04
	350													2.32E-03		1.27E-03		2.86	2.86E-03	-2.54E+00	-2.90E+00	9.82E+01	1.00
	375													1.60E-02		9.13E-03		2.67	2.67E-03	-2.57E+00	-2.04E+00	n
	400													8.75E-02		5.17E-02		2.50	2.50E-03	-2.60E+00	-1.29E+00	2.65
	425													3.96E-01		2.42E-01		2.35	2.35E-03	-2.63E+00	-6.17E-01	Ea	1.00
	450													1.53E+00		9.58E-01		2.22	2.22E-03	-2.65E+00	-1.84E-02	9382	9.58E-01
	P1
	P2															Ea shift
	P3															-1.15E+03
>CHOO. | >CH-	T													T-dependence	Target	Final		1000/T	1/T	log(1/T)	log(>CHOO. | >CH-)	log(T)	Replicate
	200													1.53E-12		4.89E-10		5.00	5.00E-03	-2.30E+00	-9.31E+00	A	4.14E-10
	225													3.41E-10		5.75E-08		4.44	4.44E-03	-2.35E+00	-7.24E+00	5.35E+09	0.85
	250													2.66E-08		2.68E-06		4.00	4.00E-03	-2.40E+00	-5.57E+00	Ea
	260													1.21E-07		1.02E-05		3.85	3.85E-03	-2.41E+00	-4.99E+00	8.80E+03
	270													4.95E-07		3.54E-05		3.70	3.70E-03	-2.43E+00	-4.45E+00		1.06
	280													1.83E-06		1.13E-04		3.57	3.57E-03	-2.45E+00	-3.95E+00		1.19E-04
	290													6.22E-06		3.32E-04		3.45	3.45E-03	-2.46E+00	-3.48E+00	-2.65E+00
	298													1.56E-05	7.50E-04	7.50E-04		3.36	3.36E-03	-2.47E+00	-3.12E+00	-3.48E+03
	310													5.72E-05		2.36E-03		3.23	3.23E-03	-2.49E+00	-2.63E+00	1.99E+00
	320													1.57E-04		5.76E-03		3.13	3.13E-03	-2.51E+00	-2.24E+00	#N/A
	330													4.06E-04		1.34E-02		3.03	3.03E-03	-2.52E+00	-1.87E+00	#N/A
	340													9.94E-04		2.96E-02		2.94	2.94E-03	-2.53E+00	-1.53E+00	A	2.96E-02
	350													2.32E-03		6.26E-02		2.86	2.86E-03	-2.54E+00	-1.20E+00	9.82E+01	1.00
	375													1.60E-02		3.46E-01		2.67	2.67E-03	-2.57E+00	-4.60E-01	n
	400													8.75E-02		1.56E+00		2.50	2.50E-03	-2.60E+00	1.94E-01	2.65
	425													3.96E-01		5.98E+00		2.35	2.35E-03	-2.63E+00	7.76E-01	Ea	1.00
	450													1.53E+00		1.98E+01		2.22	2.22E-03	-2.65E+00	1.30E+00	8019	1.98E+01
	P1
	P2															Ea shift
	P3															-1.46E+02
>C(OO.)- | -CH2-	T													T-dependence	Target	Final		1000/T	1/T	log(1/T)	log(>C(OO.)- | -CH2-)	log(T)	Replicate
	200													1.53E-12		3.18E-12		5.00	5.00E-03	-2.30E+00	-1.15E+01	A	2.69E-12
	225													3.41E-10		6.54E-10		4.44	4.44E-03	-2.35E+00	-9.18E+00	5.35E+09	0.85
	250													2.66E-08		4.78E-08		4.00	4.00E-03	-2.40E+00	-7.32E+00	Ea
	260													1.21E-07		2.13E-07		3.85	3.85E-03	-2.41E+00	-6.67E+00	9.81E+03
	270													4.95E-07		8.50E-07		3.70	3.70E-03	-2.43E+00	-6.07E+00		1.06
	280													1.83E-06		3.09E-06		3.57	3.57E-03	-2.45E+00	-5.51E+00		3.27E-06
	290													6.22E-06		1.03E-05		3.45	3.45E-03	-2.46E+00	-4.99E+00	-2.65E+00
	298													1.56E-05	2.55E-05	2.55E-05		3.36	3.36E-03	-2.47E+00	-4.59E+00	-3.92E+03
	310													5.72E-05		9.16E-05		3.23	3.23E-03	-2.49E+00	-4.04E+00	1.99E+00
	320													1.57E-04		2.48E-04		3.13	3.13E-03	-2.51E+00	-3.61E+00	#N/A
	330													4.06E-04		6.32E-04		3.03	3.03E-03	-2.52E+00	-3.20E+00	#N/A
	340													9.94E-04		1.53E-03		2.94	2.94E-03	-2.53E+00	-2.82E+00	A	1.53E-03
	350													2.32E-03		3.52E-03		2.86	2.86E-03	-2.54E+00	-2.45E+00	9.82E+01	1.00
	375													1.60E-02		2.36E-02		2.67	2.67E-03	-2.57E+00	-1.63E+00	n
	400													8.75E-02		1.26E-01		2.50	2.50E-03	-2.60E+00	-8.99E-01	2.65
	425													3.96E-01		5.59E-01		2.35	2.35E-03	-2.63E+00	-2.53E-01	Ea	1.00
	450													1.53E+00		2.12E+00		2.22	2.22E-03	-2.65E+00	3.26E-01	9026	2.12E+00
	P1
	P2															Ea shift
	P3															-1.88E+03
>C(OO.)- | >CH-	T													T-dependence	Target	Final		1000/T	1/T	log(1/T)	log(>C(OO.)- | >CH-)	log(T)	Replicate
	200													1.53E-12		1.87E-08		5.00	5.00E-03	-2.30E+00	-7.73E+00	A	1.58E-08
	225													3.41E-10		1.47E-06		4.44	4.44E-03	-2.35E+00	-5.83E+00	5.35E+09	0.85
	250													2.66E-08		4.96E-05		4.00	4.00E-03	-2.40E+00	-4.30E+00	Ea
	260													1.21E-07		1.69E-04		3.85	3.85E-03	-2.41E+00	-3.77E+00	8.07E+03
	270													4.95E-07		5.27E-04		3.70	3.70E-03	-2.43E+00	-3.28E+00		1.06
	280													1.83E-06		1.52E-03		3.57	3.57E-03	-2.45E+00	-2.82E+00		1.61E-03
	290													6.22E-06		4.10E-03		3.45	3.45E-03	-2.46E+00	-2.39E+00	-2.65E+00
	298													1.56E-05	8.66E-03	8.66E-03		3.36	3.36E-03	-2.47E+00	-2.06E+00	-3.17E+03
	310													5.72E-05		2.48E-02		3.23	3.23E-03	-2.49E+00	-1.61E+00	1.99E+00
	320													1.57E-04		5.62E-02		3.13	3.13E-03	-2.51E+00	-1.25E+00	#N/A
	330													4.06E-04		1.22E-01		3.03	3.03E-03	-2.52E+00	-9.15E-01	#N/A
	340													9.94E-04		2.52E-01		2.94	2.94E-03	-2.53E+00	-5.98E-01	A	2.52E-01
	350													2.32E-03		5.03E-01		2.86	2.86E-03	-2.54E+00	-2.99E-01	9.82E+01	1.00
	375													1.60E-02		2.42E+00		2.67	2.67E-03	-2.57E+00	3.84E-01	n
	400													8.75E-02		9.68E+00		2.50	2.50E-03	-2.60E+00	9.86E-01	2.65
	425													3.96E-01		3.32E+01		2.35	2.35E-03	-2.63E+00	1.52E+00	Ea	1.00
	450													1.53E+00		1.00E+02		2.22	2.22E-03	-2.65E+00	2.00E+00	7290	1.00E+02
1,5 Hshift
	Average temperature dependence															Ea shift
																0.00E+00
	T	-CH2OO. | -CH2-	ts special											T-dependence	Target	Final		1000/T	1/T	log(1/T)	log()	log(T)	Replicate
	200	3.91E-03	1.59E-11											2.49E-07		2.49E-07		5.00	5.00E-03	-2.30E+00	-6.60E+00	A	1.23E-07
	225	2.60E-02	2.27E-09											7.68E-06		7.68E-06		4.44	4.44E-03	-2.35E+00	-5.11E+00	3.21E+08	0.50
	250	1.46E-01	1.25E-07											1.35E-04		1.35E-04		4.00	4.00E-03	-2.40E+00	-3.87E+00	Ea
	260	2.78E-01	5.08E-07											3.76E-04		3.76E-04		3.85	3.85E-03	-2.41E+00	-3.42E+00	7.10E+03
	270	5.20E-01	1.87E-06											9.86E-04		9.86E-04		3.70	3.70E-03	-2.43E+00	-3.01E+00		1.28
	280	9.53E-01	6.29E-06											2.45E-03		2.45E-03		3.57	3.57E-03	-2.45E+00	-2.61E+00		3.13E-03
	290	1.71E+00	1.96E-05											5.79E-03		5.79E-03		3.45	3.45E-03	-2.46E+00	-2.24E+00	-1.12E+01
	298	2.71E+00	4.60E-05											1.12E-02	1.12E-02	1.12E-02		3.36	3.36E-03	-2.47E+00	-1.95E+00	-1.65E+03
	310	5.26E+00	1.54E-04											2.84E-02		2.84E-02		3.23	3.23E-03	-2.49E+00	-1.55E+00	-2.42E+01
	320	8.99E+00	3.94E-04											5.95E-02		5.95E-02		3.13	3.13E-03	-2.51E+00	-1.23E+00	#N/A
	330	1.51E+01	9.58E-04											1.20E-01		1.20E-01		3.03	3.03E-03	-2.52E+00	-9.19E-01	#N/A
	340	2.52E+01	2.22E-03											2.36E-01		2.36E-01		2.94	2.94E-03	-2.53E+00	-6.27E-01	A	2.36E-01
	350	4.12E+01	4.90E-03											4.49E-01		4.49E-01		2.86	2.86E-03	-2.54E+00	-3.47E-01	6.10E-25	1.00
	375	1.34E+02	3.00E-02											2.01E+00		2.01E+00		2.67	2.67E-03	-2.57E+00	3.03E-01	n
	400	4.08E+02	1.49E-01											7.79E+00		7.79E+00		2.50	2.50E-03	-2.60E+00	8.92E-01	11.23
	425	1.16E+03	6.22E-01											2.69E+01		2.69E+01		2.35	2.35E-03	-2.63E+00	1.43E+00	Ea	1.00
	450	3.14E+03	2.24E+00											8.38E+01		8.38E+01		2.22	2.22E-03	-2.65E+00	1.92E+00	3790	8.38E+01
		s	s	s	p	p
	P1	8.16337694314091E-53	1.54325908845767E-61	8.20169750105824E-62	4.43134353085492E-63	112100
	P2	20.4136340211219	23.3073018748375	23.3132858854	23.7685505556068	2.01E+00										Ea shift
	P3	-1.19E+03	-2.41E+03	-2.53E+03	-2.59E+03	6.11E+03										0.00E+00
-CH2OO. | -CH2-	T	Vereecken 2019	Vereecken 2019	Vereecken 2019	Vereecken 2019	Zhang and Dibble 2011								T-dependence	Target	Final		1000/T	1/T	log(1/T)	log(-CH2OO. | -CH2-)	log(T)	Replicate
	200	3.01E-03	1.13E-02	1.12E-02	9.40E-03	2.55E-04								3.91E-03		3.91E-03		5.00	5.00E-03	-2.30E+00	-2.41E+00	A	1.22E-03
	225	1.72E-02	4.61E-02	4.29E-02	3.66E-02	9.59E-03								2.60E-02		2.60E-02		4.44	4.44E-03	-2.35E+00	-1.58E+00	6.69E+07	0.31
	250	8.67E-02	1.84E-01	1.63E-01	1.41E-01	1.79E-01								1.46E-01		1.46E-01		4.00	4.00E-03	-2.40E+00	-8.37E-01	Ea
	260	1.61E-01	3.17E-01	2.75E-01	2.41E-01	4.94E-01								2.78E-01		2.78E-01		3.85	3.85E-03	-2.41E+00	-5.56E-01	4.94E+03
	270	2.93E-01	5.42E-01	4.62E-01	4.08E-01	1.27E+00								5.20E-01		5.20E-01		3.70	3.70E-03	-2.43E+00	-2.84E-01		1.50
	280	5.25E-01	9.20E-01	7.72E-01	6.86E-01	3.07E+00								9.53E-01		9.53E-01		3.57	3.57E-03	-2.45E+00	-2.09E-02		1.43E+00
	290	9.28E-01	1.55E+00	1.28E+00	1.15E+00	6.98E+00								1.71E+00		1.71E+00		3.45	3.45E-03	-2.46E+00	2.34E-01	-1.86E+01
	298	1.45E+00	2.34E+00	1.91E+00	1.72E+00	1.30E+01								2.71E+00	2.71E+00	2.71E+00		3.36	3.36E-03	-2.47E+00	4.32E-01	2.28E+02
	310	2.78E+00	4.29E+00	3.46E+00	3.15E+00	3.10E+01								5.26E+00		5.26E+00		3.23	3.23E-03	-2.49E+00	7.21E-01	-4.63E+01
	320	4.71E+00	7.05E+00	5.62E+00	5.15E+00	6.12E+01								8.99E+00		8.99E+00		3.13	3.13E-03	-2.51E+00	9.54E-01	#N/A
	330	7.88E+00	1.15E+01	9.06E+00	8.37E+00	1.16E+02								1.51E+01		1.51E+01		3.03	3.03E-03	-2.52E+00	1.18E+00	#N/A
	340	1.30E+01	1.86E+01	1.45E+01	1.35E+01	2.12E+02								2.52E+01		2.52E+01		2.94	2.94E-03	-2.53E+00	1.40E+00	A	2.52E+01
	350	2.13E+01	2.98E+01	2.30E+01	2.16E+01	3.76E+02								4.12E+01		4.12E+01		2.86	2.86E-03	-2.54E+00	1.62E+00	5.52E-47	1.00
	375	6.93E+01	9.41E+01	7.11E+01	6.80E+01	1.38E+03								1.34E+02		1.34E+02		2.67	2.67E-03	-2.57E+00	2.13E+00	n
	400	2.12E+02	2.83E+02	2.10E+02	2.05E+02	4.35E+03								4.08E+02		4.08E+02		2.50	2.50E-03	-2.60E+00	2.61E+00	18.56
	425	6.13E+02	8.17E+02	5.95E+02	5.90E+02	1.21E+04								1.16E+03		1.16E+03		2.35	2.35E-03	-2.63E+00	3.07E+00	Ea	1.00
	450	1.69E+03	2.26E+03	1.62E+03	1.64E+03	3.00E+04								3.14E+03		3.14E+03		2.22	2.22E-03	-2.65E+00	3.50E+00	-525	3.14E+03
		p
	P1	1.23E+11
	P2	9.41E+03														Ea shift
	P3	1.47E+08														-1.19E+03
-CH2OO. | >CH-	T	Otkjaer et al. 2018												T-dependence	Target	Final		1000/T	1/T	log(1/T)	log(-CH2OO. | >CH-)	log(T)	Replicate
	200													2.49E-07		9.78E-05		5.00	5.00E-03	-2.30E+00	-4.01E+00	A	4.84E-05
	225													7.68E-06		1.55E-03		4.44	4.44E-03	-2.35E+00	-2.81E+00	3.21E+08	0.50
	250													1.35E-04		1.61E-02		4.00	4.00E-03	-2.40E+00	-1.79E+00	Ea
	260													3.76E-04		3.72E-02		3.85	3.85E-03	-2.41E+00	-1.43E+00	5.90E+03
	270													9.86E-04		8.22E-02		3.70	3.70E-03	-2.43E+00	-1.08E+00		1.28
	280													2.45E-03		1.74E-01		3.57	3.57E-03	-2.45E+00	-7.58E-01		2.23E-01
	290	4.13E-01												5.79E-03		3.56E-01		3.45	3.45E-03	-2.46E+00	-4.49E-01	-1.12E+01
	298	6.15E-01												1.12E-02	6.15E-01	6.15E-01		3.36	3.36E-03	-2.47E+00	-2.11E-01	-1.13E+03
	310	1.12E+00												2.84E-02		1.34E+00		3.23	3.23E-03	-2.49E+00	1.27E-01	-2.42E+01
	320	1.85E+00												5.95E-02		2.49E+00		3.13	3.13E-03	-2.51E+00	3.96E-01	#N/A
	330													1.20E-01		4.50E+00		3.03	3.03E-03	-2.52E+00	6.53E-01	#N/A
	340													2.36E-01		7.92E+00		2.94	2.94E-03	-2.53E+00	8.99E-01	A	7.92E+00
	350													4.49E-01		1.36E+01		2.86	2.86E-03	-2.54E+00	1.13E+00	6.10E-25	1.00
	375													2.01E+00		4.85E+01		2.67	2.67E-03	-2.57E+00	1.69E+00	n
	400													7.79E+00		1.54E+02		2.50	2.50E-03	-2.60E+00	2.19E+00	11.23
	425													2.69E+01		4.47E+02		2.35	2.35E-03	-2.63E+00	2.65E+00	Ea	1.00
	450													8.38E+01		1.19E+03		2.22	2.22E-03	-2.65E+00	3.08E+00	2595	1.19E+03
	P1
	P2															Ea shift
	P3															-2.50E+02
>CHOO. | -CH2-	T													T-dependence	Target	Final		1000/T	1/T	log(1/T)	log(>CHOO. | -CH2-)	log(T)	Replicate
	200													2.49E-07		8.69E-07		5.00	5.00E-03	-2.30E+00	-6.06E+00	A	4.30E-07
	225													7.68E-06		2.33E-05		4.44	4.44E-03	-2.35E+00	-4.63E+00	3.21E+08	0.50
	250													1.35E-04		3.67E-04		4.00	4.00E-03	-2.40E+00	-3.44E+00	Ea
	260													3.76E-04		9.83E-04		3.85	3.85E-03	-2.41E+00	-3.01E+00	6.85E+03
	270													9.86E-04		2.49E-03		3.70	3.70E-03	-2.43E+00	-2.60E+00		1.28
	280													2.45E-03		5.97E-03		3.57	3.57E-03	-2.45E+00	-2.22E+00		7.64E-03
	290													5.79E-03		1.37E-02		3.45	3.45E-03	-2.46E+00	-1.86E+00	-1.12E+01
	298													1.12E-02	2.58E-02	2.58E-02		3.36	3.36E-03	-2.47E+00	-1.59E+00	-1.54E+03
	310													2.84E-02		6.37E-02		3.23	3.23E-03	-2.49E+00	-1.20E+00	-2.42E+01
	320													5.95E-02		1.30E-01		3.13	3.13E-03	-2.51E+00	-8.86E-01	#N/A
	330													1.20E-01		2.57E-01		3.03	3.03E-03	-2.52E+00	-5.90E-01	#N/A
	340													2.36E-01		4.92E-01		2.94	2.94E-03	-2.53E+00	-3.08E-01	A	4.92E-01
	350													4.49E-01		9.18E-01		2.86	2.86E-03	-2.54E+00	-3.73E-02	6.10E-25	1.00
	375													2.01E+00		3.91E+00		2.67	2.67E-03	-2.57E+00	5.92E-01	n
	400													7.79E+00		1.46E+01		2.50	2.50E-03	-2.60E+00	1.16E+00	11.23
	425													2.69E+01		4.84E+01		2.35	2.35E-03	-2.63E+00	1.68E+00	Ea	1.00
	450													8.38E+01		1.46E+02		2.22	2.22E-03	-2.65E+00	2.16E+00	3540	1.46E+02
		p	p
	P1	4.58E+11	2.62E+11
	P2	9.64E+03	9.02E+03													Ea shift
	P3	1.43E+08	1.41E+08													-1.53E+03
>CHOO. | >CH-	T	Otkjaer et al. 2018	Otkjaer et al. 2018											T-dependence	Target	Final		1000/T	1/T	log(1/T)	log(>CHOO. | >CH-)	log(T)	Replicate
	200													2.49E-07		5.15E-04		5.00	5.00E-03	-2.30E+00	-3.29E+00	A	2.55E-04
	225													7.68E-06		6.80E-03		4.44	4.44E-03	-2.35E+00	-2.17E+00	3.21E+08	0.50
	250													1.35E-04		6.07E-02		4.00	4.00E-03	-2.40E+00	-1.22E+00	Ea
	260													3.76E-04		1.33E-01		3.85	3.85E-03	-2.41E+00	-8.75E-01	5.57E+03
	270													9.86E-04		2.82E-01		3.70	3.70E-03	-2.43E+00	-5.50E-01		1.28
	280													2.45E-03		5.71E-01		3.57	3.57E-03	-2.45E+00	-2.43E-01		7.31E-01
	290	5.90E-01	2.64E+00											5.79E-03		1.12E+00		3.45	3.45E-03	-2.46E+00	4.90E-02	-1.12E+01
	298	9.09E-01	3.86E+00											1.12E-02	1.87E+00	1.87E+00		3.36	3.36E-03	-2.47E+00	2.73E-01	-9.83E+02
	310	1.74E+00	6.87E+00											2.84E-02		3.92E+00		3.23	3.23E-03	-2.49E+00	5.93E-01	-2.42E+01
	320	2.97E+00	1.11E+01											5.95E-02		7.03E+00		3.13	3.13E-03	-2.51E+00	8.47E-01	#N/A
	330													1.20E-01		1.23E+01		3.03	3.03E-03	-2.52E+00	1.09E+00	#N/A
	340													2.36E-01		2.10E+01		2.94	2.94E-03	-2.53E+00	1.32E+00	A	2.10E+01
	350													4.49E-01		3.52E+01		2.86	2.86E-03	-2.54E+00	1.55E+00	6.10E-25	1.00
	375													2.01E+00		1.18E+02		2.67	2.67E-03	-2.57E+00	2.07E+00	n
	400													7.79E+00		3.54E+02		2.50	2.50E-03	-2.60E+00	2.55E+00	11.23
	425													2.69E+01		9.76E+02		2.35	2.35E-03	-2.63E+00	2.99E+00	Ea	1.00
	450													8.38E+01		2.49E+03		2.22	2.22E-03	-2.65E+00	3.40E+00	2263	2.49E+03
		t(6cyc)
	P1	0.006743019571777
	P2	3.89826817956792														Ea shift
	P3	8.10E+03														0.00E+00
>C(OO.)- | -CH2-	T	Vereecken 2019												T-dependence	Target	Final		1000/T	1/T	log(1/T)	log(>C(OO.)- | -CH2-)	log(T)	Replicate
	200	1.59E-11												1.59E-11		1.59E-11		5.00	5.00E-03	-2.30E+00	-1.08E+01	A	1.24E-11
	225	2.27E-09												2.27E-09		2.27E-09		4.44	4.44E-03	-2.35E+00	-8.64E+00	1.54E+09	0.78
	250	1.25E-07												1.25E-07		1.25E-07		4.00	4.00E-03	-2.40E+00	-6.90E+00	Ea
	260	5.08E-07												5.08E-07		5.08E-07		3.85	3.85E-03	-2.41E+00	-6.29E+00	9.25E+03
	270	1.87E-06												1.87E-06		1.87E-06		3.70	3.70E-03	-2.43E+00	-5.73E+00		1.09
	280	6.29E-06												6.29E-06		6.29E-06		3.57	3.57E-03	-2.45E+00	-5.20E+00		6.85E-06
	290	1.96E-05												1.96E-05		1.96E-05		3.45	3.45E-03	-2.46E+00	-4.71E+00	-3.90E+00
	298	4.60E-05												4.60E-05	4.60E-05	4.60E-05		3.36	3.36E-03	-2.47E+00	-4.34E+00	-3.52E+03
	310	1.54E-04												1.54E-04		1.54E-04		3.23	3.23E-03	-2.49E+00	-3.81E+00	-2.17E+00
	320	3.94E-04												3.94E-04		3.94E-04		3.13	3.13E-03	-2.51E+00	-3.40E+00	#N/A
	330	9.58E-04												9.58E-04		9.58E-04		3.03	3.03E-03	-2.52E+00	-3.02E+00	#N/A
	340	2.22E-03												2.22E-03		2.22E-03		2.94	2.94E-03	-2.53E+00	-2.65E+00	A	2.22E-03
	350	4.90E-03												4.90E-03		4.90E-03		2.86	2.86E-03	-2.54E+00	-2.31E+00	6.74E-03	1.00
	375	3.00E-02												3.00E-02		3.00E-02		2.67	2.67E-03	-2.57E+00	-1.52E+00	n
	400	1.49E-01												1.49E-01		1.49E-01		2.50	2.50E-03	-2.60E+00	-8.27E-01	3.90
	425	6.22E-01												6.22E-01		6.22E-01		2.35	2.35E-03	-2.63E+00	-2.06E-01	Ea	1.00
	450	2.24E+00												2.24E+00		2.24E+00		2.22	2.22E-03	-2.65E+00	3.50E-01	8104	2.24E+00
	P1
	P2															Ea shift
	P3															-4.59E+01
>C(OO.)- | >CH-	T													T-dependence	Target	Final		1000/T	1/T	log(1/T)	log(>C(OO.)- | >CH-)	log(T)	Replicate
	200													2.49E-07		3.13E-07		5.00	5.00E-03	-2.30E+00	-6.50E+00	A	1.55E-07
	225													7.68E-06		9.42E-06		4.44	4.44E-03	-2.35E+00	-5.03E+00	3.21E+08	0.50
	250													1.35E-04		1.62E-04		4.00	4.00E-03	-2.40E+00	-3.79E+00	Ea
	260													3.76E-04		4.49E-04		3.85	3.85E-03	-2.41E+00	-3.35E+00	7.05E+03
	270													9.86E-04		1.17E-03		3.70	3.70E-03	-2.43E+00	-2.93E+00		1.28
	280													2.45E-03		2.88E-03		3.57	3.57E-03	-2.45E+00	-2.54E+00		3.69E-03
	290													5.79E-03		6.78E-03		3.45	3.45E-03	-2.46E+00	-2.17E+00	-1.12E+01
	298													1.12E-02	1.30E-02	1.30E-02		3.36	3.36E-03	-2.47E+00	-1.89E+00	-1.63E+03
	310													2.84E-02		3.30E-02		3.23	3.23E-03	-2.49E+00	-1.48E+00	-2.42E+01
	320													5.95E-02		6.87E-02		3.13	3.13E-03	-2.51E+00	-1.16E+00	#N/A
	330													1.20E-01		1.38E-01		3.03	3.03E-03	-2.52E+00	-8.59E-01	#N/A
	340													2.36E-01		2.70E-01		2.94	2.94E-03	-2.53E+00	-5.68E-01	A	2.70E-01
	350													4.49E-01		5.12E-01		2.86	2.86E-03	-2.54E+00	-2.90E-01	6.10E-25	1.00
	375													2.01E+00		2.27E+00		2.67	2.67E-03	-2.57E+00	3.56E-01	n
	400													7.79E+00		8.74E+00		2.50	2.50E-03	-2.60E+00	9.42E-01	11.23
	425													2.69E+01		2.99E+01		2.35	2.35E-03	-2.63E+00	1.48E+00	Ea	1.00
	450													8.38E+01		9.28E+01		2.22	2.22E-03	-2.65E+00	1.97E+00	3744	9.28E+01
1,6 Hshift
	Average temperature dependence															Ea shift
																0.00E+00
	T	-CH2OO. | -CH2-	ts special	tt special										T-dependence	Target	Final		1000/T	1/T	log(1/T)	log()	log(T)	Replicate
	200	3.60E-02	1.97E-02	1.06E-08										1.96E-04		1.96E-04		5.00	5.00E-03	-2.30E+00	-3.71E+00	A	7.64E-05
	225	1.27E-01	8.96E-02	7.37E-07										2.03E-03		2.03E-03		4.44	4.44E-03	-2.35E+00	-2.69E+00	5.38E+07	0.39
	250	4.40E-01	3.67E-01	2.36E-05										1.56E-02		1.56E-02		4.00	4.00E-03	-2.40E+00	-1.81E+00	Ea
	260	7.16E-01	6.28E-01	7.98E-05										3.30E-02		3.30E-02		3.85	3.85E-03	-2.41E+00	-1.48E+00	5.46E+03
	270	1.16E+00	1.06E+00	2.49E-04										6.73E-02		6.73E-02		3.70	3.70E-03	-2.43E+00	-1.17E+00		1.39
	280	1.86E+00	1.76E+00	7.21E-04										1.33E-01		1.33E-01		3.57	3.57E-03	-2.45E+00	-8.75E-01		1.85E-01
	290	2.97E+00	2.90E+00	1.96E-03										2.56E-01		2.56E-01		3.45	3.45E-03	-2.46E+00	-5.91E-01	-1.50E+01
	298	4.29E+00	4.27E+00	4.17E-03										4.24E-01	4.24E-01	4.24E-01		3.36	3.36E-03	-2.47E+00	-3.72E-01	-4.44E+02
	310	7.39E+00	7.53E+00	1.21E-02										8.77E-01		8.77E-01		3.23	3.23E-03	-2.49E+00	-5.68E-02	-3.61E+01
	320	1.15E+01	1.19E+01	2.80E-02										1.57E+00		1.57E+00		3.13	3.13E-03	-2.51E+00	1.95E-01	#N/A
	330	1.79E+01	1.87E+01	6.19E-02										2.74E+00		2.74E+00		3.03	3.03E-03	-2.52E+00	4.39E-01	#N/A
	340	2.75E+01	2.90E+01	1.31E-01										4.71E+00		4.71E+00		2.94	2.94E-03	-2.53E+00	6.73E-01	A	4.71E+00
	350	4.20E+01	4.45E+01	2.68E-01										7.94E+00		7.94E+00		2.86	2.86E-03	-2.54E+00	9.00E-01	7.71E-37	1.00
	375	1.17E+02	1.25E+02	1.38E+00										2.72E+01		2.72E+01		2.67	2.67E-03	-2.57E+00	1.44E+00	n
	400	3.15E+02	3.31E+02	5.95E+00										8.53E+01		8.53E+01		2.50	2.50E-03	-2.60E+00	1.93E+00	15.05
	425	8.13E+02	8.37E+02	2.21E+01										2.47E+02		2.47E+02		2.35	2.35E-03	-2.63E+00	2.39E+00	Ea	1.00
	450	2.02E+03	2.02E+03	7.26E+01										6.67E+02		6.67E+02		2.22	2.22E-03	-2.65E+00	2.82E+00	1022	6.67E+02
		s	s	p	p
	P1	4.681626428154E-55	6.96612155210062E-53	1.8766178793688E-56	2.61E+10
	P2	20.9601185317883	20.187221091819	21.3839281065272	9.40E+03											Ea shift
	P3	-2.10E+03	-2.06E+03	-2.28E+03	1.60E+08											2.21E+02
-CH2OO. | -CH2-	T	Vereecken 2019	Vereecken 2019	Vereecken 2019	Otkjaer et al. 2018									T-dependence	Target	Final		1000/T	1/T	log(1/T)	log(-CH2OO. | -CH2-)	log(T)	Replicate
	200	2.95E-02	5.98E-02	2.65E-02										3.60E-02		1.19E-02		5.00	5.00E-03	-2.30E+00	-1.92E+00	A	3.24E-03
	225	1.08E-01	2.05E-01	9.30E-02										1.27E-01		4.76E-02		4.44	4.44E-03	-2.35E+00	-1.32E+00	4.59E+06	0.27
	250	3.87E-01	6.86E-01	3.21E-01										4.40E-01		1.82E-01		4.00	4.00E-03	-2.40E+00	-7.41E-01	Ea
	260	6.36E-01	1.10E+00	5.24E-01										7.16E-01		3.06E-01		3.85	3.85E-03	-2.41E+00	-5.14E-01	4.21E+03
	270	1.04E+00	1.76E+00	8.49E-01										1.16E+00		5.11E-01		3.70	3.70E-03	-2.43E+00	-2.92E-01		1.58
	280	1.69E+00	2.79E+00	1.37E+00										1.86E+00		8.44E-01		3.57	3.57E-03	-2.45E+00	-7.34E-02		1.33E+00
	290	2.72E+00	4.40E+00	2.19E+00	1.54E-01									2.97E+00		1.38E+00		3.45	3.45E-03	-2.46E+00	1.41E-01	-2.08E+01
	298	3.96E+00	6.29E+00	3.17E+00	2.20E-01									4.29E+00	2.04E+00	2.04E+00		3.36	3.36E-03	-2.47E+00	3.10E-01	8.37E+02
	310	6.88E+00	1.07E+01	5.48E+00	3.80E-01									7.39E+00		3.62E+00		3.23	3.23E-03	-2.49E+00	5.59E-01	-5.41E+01
	320	1.08E+01	1.65E+01	8.60E+00	6.02E-01									1.15E+01		5.78E+00		3.13	3.13E-03	-2.51E+00	7.62E-01	#N/A
	330	1.69E+01	2.52E+01	1.34E+01										1.79E+01		9.14E+00		3.03	3.03E-03	-2.52E+00	9.61E-01	#N/A
	340	2.62E+01	3.83E+01	2.07E+01										2.75E+01		1.43E+01		2.94	2.94E-03	-2.53E+00	1.16E+00	A	1.43E+01
	350	4.03E+01	5.78E+01	3.17E+01										4.20E+01		2.23E+01		2.86	2.86E-03	-2.54E+00	1.35E+00	8.49E-55	1.00
	375	1.15E+02	1.57E+02	8.99E+01										1.17E+02		6.51E+01		2.67	2.67E-03	-2.57E+00	1.81E+00	n
	400	3.12E+02	4.10E+02	2.45E+02										3.15E+02		1.81E+02		2.50	2.50E-03	-2.60E+00	2.26E+00	20.84
	425	8.17E+02	1.03E+03	6.40E+02										8.13E+02		4.83E+02		2.35	2.35E-03	-2.63E+00	2.68E+00	Ea	1.00
	450	2.06E+03	2.49E+03	1.61E+03										2.02E+03		1.24E+03		2.22	2.22E-03	-2.65E+00	3.09E+00	-1928	1.24E+03
		p
	P1	4.42E+10
	P2	8.96E+03														Ea shift
	P3	1.39E+08														-1.65E+02
-CH2OO. | >CH-	T	Otkjaer et al. 2018												T-dependence	Target	Final		1000/T	1/T	log(1/T)	log(-CH2OO. | >CH-)	log(T)	Replicate
	200													1.96E-04		4.48E-04		5.00	5.00E-03	-2.30E+00	-3.35E+00	A	1.75E-04
	225													2.03E-03		4.24E-03		4.44	4.44E-03	-2.35E+00	-2.37E+00	5.38E+07	0.39
	250													1.56E-02		3.03E-02		4.00	4.00E-03	-2.40E+00	-1.52E+00	Ea
	260													3.30E-02		6.23E-02		3.85	3.85E-03	-2.41E+00	-1.21E+00	5.29E+03
	270													6.73E-02		1.24E-01		3.70	3.70E-03	-2.43E+00	-9.06E-01		1.39
	280													1.33E-01		2.41E-01		3.57	3.57E-03	-2.45E+00	-6.19E-01		3.34E-01
	290	5.04E-01												2.56E-01		4.53E-01		3.45	3.45E-03	-2.46E+00	-3.44E-01	-1.50E+01
	298	7.39E-01												4.24E-01	7.39E-01	7.39E-01		3.36	3.36E-03	-2.47E+00	-1.31E-01	-3.72E+02
	310	1.32E+00												8.77E-01		1.50E+00		3.23	3.23E-03	-2.49E+00	1.75E-01	-3.61E+01
	320	2.13E+00												1.57E+00		2.63E+00		3.13	3.13E-03	-2.51E+00	4.20E-01	#N/A
	330													2.74E+00		4.53E+00		3.03	3.03E-03	-2.52E+00	6.56E-01	#N/A
	340													4.71E+00		7.66E+00		2.94	2.94E-03	-2.53E+00	8.84E-01	A	7.66E+00
	350													7.94E+00		1.27E+01		2.86	2.86E-03	-2.54E+00	1.11E+00	7.71E-37	1.00
	375													2.72E+01		4.23E+01		2.67	2.67E-03	-2.57E+00	1.63E+00	n
	400													8.53E+01		1.29E+02		2.50	2.50E-03	-2.60E+00	2.11E+00	15.05
	425													2.47E+02		3.64E+02		2.35	2.35E-03	-2.63E+00	2.56E+00	Ea	1.00
	450													6.67E+02		9.63E+02		2.22	2.22E-03	-2.65E+00	2.98E+00	857	9.63E+02
	P1
	P2															Ea shift
	P3															5.09E+02
>CHOO. | -CH2-	T													T-dependence	Target	Final		1000/T	1/T	log(1/T)	log(>CHOO. | -CH2-)	log(T)	Replicate
	200													1.96E-04		1.54E-05		5.00	5.00E-03	-2.30E+00	-4.81E+00	A	5.99E-06
	225													2.03E-03		2.12E-04		4.44	4.44E-03	-2.35E+00	-3.67E+00	5.38E+07	0.39
	250													1.56E-02		2.04E-03		4.00	4.00E-03	-2.40E+00	-2.69E+00	Ea
	260													3.30E-02		4.66E-03		3.85	3.85E-03	-2.41E+00	-2.33E+00	5.97E+03
	270													6.73E-02		1.02E-02		3.70	3.70E-03	-2.43E+00	-1.99E+00		1.39
	280													1.33E-01		2.16E-02		3.57	3.57E-03	-2.45E+00	-1.66E+00		3.01E-02
	290													2.56E-01		4.43E-02		3.45	3.45E-03	-2.46E+00	-1.35E+00	-1.50E+01
	298													4.24E-01	7.68E-02	7.68E-02		3.36	3.36E-03	-2.47E+00	-1.11E+00	-6.65E+02
	310													8.77E-01		1.70E-01		3.23	3.23E-03	-2.49E+00	-7.70E-01	-3.61E+01
	320													1.57E+00		3.20E-01		3.13	3.13E-03	-2.51E+00	-4.95E-01	#N/A
	330													2.74E+00		5.87E-01		3.03	3.03E-03	-2.52E+00	-2.31E-01	#N/A
	340													4.71E+00		1.05E+00		2.94	2.94E-03	-2.53E+00	2.29E-02	A	1.05E+00
	350													7.94E+00		1.85E+00		2.86	2.86E-03	-2.54E+00	2.68E-01	7.71E-37	1.00
	375													2.72E+01		7.01E+00		2.67	2.67E-03	-2.57E+00	8.46E-01	n
	400													8.53E+01		2.39E+01		2.50	2.50E-03	-2.60E+00	1.38E+00	15.05
	425													2.47E+02		7.45E+01		2.35	2.35E-03	-2.63E+00	1.87E+00	Ea	1.00
	450													6.67E+02		2.15E+02		2.22	2.22E-03	-2.65E+00	2.33E+00	1531	2.15E+02
	P1
	P2															Ea shift
	P3															-8.22E+02
>CHOO. | >CH-	T													T-dependence	Target	Final		1000/T	1/T	log(1/T)	log(>CHOO. | >CH-)	log(T)	Replicate
	200													1.96E-04		1.19E-02		5.00	5.00E-03	-2.30E+00	-1.92E+00	A	4.65E-03
	225													2.03E-03		7.84E-02		4.44	4.44E-03	-2.35E+00	-1.11E+00	5.38E+07	0.39
	250													1.56E-02		4.18E-01		4.00	4.00E-03	-2.40E+00	-3.79E-01	Ea
	260													3.30E-02		7.78E-01		3.85	3.85E-03	-2.41E+00	-1.09E-01	4.63E+03
	270													6.73E-02		1.41E+00		3.70	3.70E-03	-2.43E+00	1.50E-01		1.39
	280													1.33E-01		2.51E+00		3.57	3.57E-03	-2.45E+00	3.99E-01		3.49E+00
	290													2.56E-01		4.36E+00		3.45	3.45E-03	-2.46E+00	6.39E-01	-1.50E+01
	298													4.24E-01	6.69E+00	6.69E+00		3.36	3.36E-03	-2.47E+00	8.25E-01	-8.69E+01
	310													8.77E-01		1.24E+01		3.23	3.23E-03	-2.49E+00	1.09E+00	-3.61E+01
	320													1.57E+00		2.05E+01		3.13	3.13E-03	-2.51E+00	1.31E+00	#N/A
	330													2.74E+00		3.31E+01		3.03	3.03E-03	-2.52E+00	1.52E+00	#N/A
	340													4.71E+00		5.28E+01		2.94	2.94E-03	-2.53E+00	1.72E+00	A	5.28E+01
	350													7.94E+00		8.31E+01		2.86	2.86E-03	-2.54E+00	1.92E+00	7.71E-37	1.00
	375													2.72E+01		2.44E+02		2.67	2.67E-03	-2.57E+00	2.39E+00	n
	400													8.53E+01		6.66E+02		2.50	2.50E-03	-2.60E+00	2.82E+00	15.05
	425													2.47E+02		1.71E+03		2.35	2.35E-03	-2.63E+00	3.23E+00	Ea	1.00
	450													6.67E+02		4.14E+03		2.22	2.22E-03	-2.65E+00	3.62E+00	200	4.14E+03
		s(6cyc)
	P1	7.71553152042948E-46
	P2	17.8631423478716														Ea shift
	P3	-1.06E+03														0.00E+00
>C(OO.)- | -CH2-	T	Vereecken 2019												T-dependence	Target	Final		1000/T	1/T	log(1/T)	log(>C(OO.)- | -CH2-)	log(T)	Replicate
	200	1.97E-02												1.97E-02		1.97E-02		5.00	5.00E-03	-2.30E+00	-1.71E+00	A	6.44E-03
	225	8.96E-02												8.96E-02		8.96E-02		4.44	4.44E-03	-2.35E+00	-1.05E+00	8.63E+06	0.33
	250	3.67E-01												3.67E-01		3.67E-01		4.00	4.00E-03	-2.40E+00	-4.35E-01	Ea
	260	6.28E-01												6.28E-01		6.28E-01		3.85	3.85E-03	-2.41E+00	-2.02E-01	4.20E+03
	270	1.06E+00												1.06E+00		1.06E+00		3.70	3.70E-03	-2.43E+00	2.54E-02		1.48
	280	1.76E+00												1.76E+00		1.76E+00		3.57	3.57E-03	-2.45E+00	2.47E-01		2.61E+00
	290	2.90E+00												2.90E+00		2.90E+00		3.45	3.45E-03	-2.46E+00	4.62E-01	-1.79E+01
	298	4.27E+00												4.27E+00	4.27E+00	4.27E+00		3.36	3.36E-03	-2.47E+00	6.31E-01	4.61E+02
	310	7.53E+00												7.53E+00		7.53E+00		3.23	3.23E-03	-2.49E+00	8.77E-01	-4.51E+01
	320	1.19E+01												1.19E+01		1.19E+01		3.13	3.13E-03	-2.51E+00	1.08E+00	#N/A
	330	1.87E+01												1.87E+01		1.87E+01		3.03	3.03E-03	-2.52E+00	1.27E+00	#N/A
	340	2.90E+01												2.90E+01		2.90E+01		2.94	2.94E-03	-2.53E+00	1.46E+00	A	2.90E+01
	350	4.45E+01												4.45E+01		4.45E+01		2.86	2.86E-03	-2.54E+00	1.65E+00	7.72E-46	1.00
	375	1.25E+02												1.25E+02		1.25E+02		2.67	2.67E-03	-2.57E+00	2.10E+00	n
	400	3.31E+02												3.31E+02		3.31E+02		2.50	2.50E-03	-2.60E+00	2.52E+00	17.86
	425	8.37E+02												8.37E+02		8.37E+02		2.35	2.35E-03	-2.63E+00	2.92E+00	Ea	1.00
	450	2.02E+03												2.02E+03		2.02E+03		2.22	2.22E-03	-2.65E+00	3.31E+00	-1061	2.02E+03
		s(6cyc)
	P1	6.9855309115121E-10
	P2	6.43474905744144														Ea shift
	P3	6.28E+03														0.00E+00
>C(OO.)- | >CH-	T	Vereecken 2019												T-dependence	Target	Final		1000/T	1/T	log(1/T)	log(>C(OO.)- | >CH-)	log(T)	Replicate
	200	1.06E-08												1.06E-08		1.06E-08		5.00	5.00E-03	-2.30E+00	-7.98E+00	A	7.07E-09
	225	7.37E-07												7.37E-07		7.37E-07		4.44	4.44E-03	-2.35E+00	-6.13E+00	3.92E+09	0.67
	250	2.36E-05												2.36E-05		2.36E-05		4.00	4.00E-03	-2.40E+00	-4.63E+00	Ea
	260	7.98E-05												7.98E-05		7.98E-05		3.85	3.85E-03	-2.41E+00	-4.10E+00	8.17E+03
	270	2.49E-04												2.49E-04		2.49E-04		3.70	3.70E-03	-2.43E+00	-3.60E+00		1.15
	280	7.21E-04												7.21E-04		7.21E-04		3.57	3.57E-03	-2.45E+00	-3.14E+00		8.30E-04
	290	1.96E-03												1.96E-03		1.96E-03		3.45	3.45E-03	-2.46E+00	-2.71E+00	-6.43E+00
	298	4.17E-03												4.17E-03	4.17E-03	4.17E-03		3.36	3.36E-03	-2.47E+00	-2.38E+00	-2.73E+03
	310	1.21E-02												1.21E-02		1.21E-02		3.23	3.23E-03	-2.49E+00	-1.92E+00	-9.16E+00
	320	2.80E-02												2.80E-02		2.80E-02		3.13	3.13E-03	-2.51E+00	-1.55E+00	#N/A
	330	6.19E-02												6.19E-02		6.19E-02		3.03	3.03E-03	-2.52E+00	-1.21E+00	#N/A
	340	1.31E-01												1.31E-01		1.31E-01		2.94	2.94E-03	-2.53E+00	-8.82E-01	A	1.31E-01
	350	2.68E-01												2.68E-01		2.68E-01		2.86	2.86E-03	-2.54E+00	-5.72E-01	6.99E-10	1.00
	375	1.38E+00												1.38E+00		1.38E+00		2.67	2.67E-03	-2.57E+00	1.40E-01	n
	400	5.95E+00												5.95E+00		5.95E+00		2.50	2.50E-03	-2.60E+00	7.75E-01	6.43
	425	2.21E+01												2.21E+01		2.21E+01		2.35	2.35E-03	-2.63E+00	1.34E+00	Ea	1.00
	450	7.26E+01												7.26E+01		7.26E+01		2.22	2.22E-03	-2.65E+00	1.86E+00	6275	7.26E+01
1,7 Hshift
	Average temperature dependence															Ea shift
																0.00E+00
	T	-CH2OO. | -CH2-												T-dependence	Target	Final		1000/T	1/T	log(1/T)	log()	log(T)	Replicate
	200	5.81E-02												5.81E-02		5.81E-02		5.00	5.00E-03	-2.30E+00	-1.24E+00	A	1.81E-02
	225	2.26E-01												2.26E-01		2.26E-01		4.44	4.44E-03	-2.35E+00	-6.46E-01	8.07E+06	0.31
	250	8.24E-01												8.24E-01		8.24E-01		4.00	4.00E-03	-2.40E+00	-8.43E-02	Ea
	260	1.36E+00												1.36E+00		1.36E+00		3.85	3.85E-03	-2.41E+00	1.32E-01	3.98E+03
	270	2.21E+00												2.21E+00		2.21E+00		3.70	3.70E-03	-2.43E+00	3.44E-01		1.50
	280	3.57E+00												3.57E+00		3.57E+00		3.57	3.57E-03	-2.45E+00	5.52E-01		5.36E+00
	290	5.70E+00												5.70E+00		5.70E+00		3.45	3.45E-03	-2.46E+00	7.55E-01	-1.86E+01
	298	8.22E+00												8.22E+00	8.22E+00	8.22E+00		3.36	3.36E-03	-2.47E+00	9.15E-01	6.53E+02
	310	1.41E+01												1.41E+01		1.41E+01		3.23	3.23E-03	-2.49E+00	1.15E+00	-4.73E+01
	320	2.19E+01												2.19E+01		2.19E+01		3.13	3.13E-03	-2.51E+00	1.34E+00	#N/A
	330	3.37E+01												3.37E+01		3.37E+01		3.03	3.03E-03	-2.52E+00	1.53E+00	#N/A
	340	5.13E+01												5.13E+01		5.13E+01		2.94	2.94E-03	-2.53E+00	1.71E+00	A	5.13E+01
	350	7.76E+01												7.76E+01		7.76E+01		2.86	2.86E-03	-2.54E+00	1.89E+00	4.62E-48	1.00
	375	2.11E+02												2.11E+02		2.11E+02		2.67	2.67E-03	-2.57E+00	2.32E+00	n
	400	5.45E+02												5.45E+02		5.45E+02		2.50	2.50E-03	-2.60E+00	2.74E+00	18.62
	425	1.35E+03												1.35E+03		1.35E+03		2.35	2.35E-03	-2.63E+00	3.13E+00	Ea	1.00
	450	3.22E+03												3.22E+03		3.22E+03		2.22	2.22E-03	-2.65E+00	3.51E+00	-1503	3.22E+03
		p	s	p
	P1	3.18491020066021E-43	3.94308278755832E-45	7.84912776362116E-56
	P2	17.0181219362243	17.6808733761355	21.1491632122146												Ea shift
	P3	-7.61E+02	-1.25E+03	-2.50E+03												0.00E+00
-CH2OO. | -CH2-	T	Vereecken 2019	Vereecken 2019	Vereecken 2019										T-dependence	Target	Final		1000/T	1/T	log(1/T)	log(-CH2OO. | -CH2-)	log(T)	Replicate
	200	2.06E-02	9.94E-02	9.58E-02										5.81E-02		5.81E-02		5.00	5.00E-03	-2.30E+00	-1.24E+00	A	1.81E-02
	225	1.00E-01	3.98E-01	2.89E-01										2.26E-01		2.26E-01		4.44	4.44E-03	-2.35E+00	-6.46E-01	8.07E+06	0.31
	250	4.30E-01	1.47E+00	8.84E-01										8.24E-01		8.24E-01		4.00	4.00E-03	-2.40E+00	-8.43E-02	Ea
	260	7.45E-01	2.43E+00	1.38E+00										1.36E+00		1.36E+00		3.85	3.85E-03	-2.41E+00	1.32E-01	3.98E+03
	270	1.27E+00	3.96E+00	2.15E+00										2.21E+00		2.21E+00		3.70	3.70E-03	-2.43E+00	3.44E-01		1.50
	280	2.13E+00	6.38E+00	3.33E+00										3.57E+00		3.57E+00		3.57	3.57E-03	-2.45E+00	5.52E-01		5.36E+00
	290	3.53E+00	1.02E+01	5.15E+00										5.70E+00		5.70E+00		3.45	3.45E-03	-2.46E+00	7.55E-01	-1.86E+01
	298	5.23E+00	1.46E+01	7.26E+00										8.22E+00	8.22E+00	8.22E+00		3.36	3.36E-03	-2.47E+00	9.15E-01	6.53E+02
	310	9.28E+00	2.50E+01	1.21E+01										1.41E+01		1.41E+01		3.23	3.23E-03	-2.49E+00	1.15E+00	-4.73E+01
	320	1.47E+01	3.87E+01	1.84E+01										2.19E+01		2.19E+01		3.13	3.13E-03	-2.51E+00	1.34E+00	#N/A
	330	2.32E+01	5.92E+01	2.79E+01										3.37E+01		3.37E+01		3.03	3.03E-03	-2.52E+00	1.53E+00	#N/A
	340	3.60E+01	8.97E+01	4.19E+01										5.13E+01		5.13E+01		2.94	2.94E-03	-2.53E+00	1.71E+00	A	5.13E+01
	350	5.53E+01	1.35E+02	6.28E+01										7.76E+01		7.76E+01		2.86	2.86E-03	-2.54E+00	1.89E+00	4.62E-48	1.00
	375	1.55E+02	3.60E+02	1.68E+02										2.11E+02		2.11E+02		2.67	2.67E-03	-2.57E+00	2.32E+00	n
	400	4.09E+02	9.14E+02	4.33E+02										5.45E+02		5.45E+02		2.50	2.50E-03	-2.60E+00	2.74E+00	18.62
	425	1.03E+03	2.22E+03	1.08E+03										1.35E+03		1.35E+03		2.35	2.35E-03	-2.63E+00	3.13E+00	Ea	1.00
	450	2.46E+03	5.18E+03	2.62E+03										3.22E+03		3.22E+03		2.22	2.22E-03	-2.65E+00	3.51E+00	-1503	3.22E+03
		p
	P1	2.15E+10
	P2	8.94E+03														Ea shift
	P3	1.37E+08														9.35E+02
-CH2OO. | >CH-	T	Otkjaer et al. 2018												T-dependence	Target	Final		1000/T	1/T	log(1/T)	log(-CH2OO. | >CH-)	log(T)	Replicate
	200													5.81E-02		5.41E-04		5.00	5.00E-03	-2.30E+00	-3.27E+00	A	1.69E-04
	225													2.26E-01		3.54E-03		4.44	4.44E-03	-2.35E+00	-2.45E+00	8.07E+06	0.31
	250													8.24E-01		1.95E-02		4.00	4.00E-03	-2.40E+00	-1.71E+00	Ea
	260													1.36E+00		3.71E-02		3.85	3.85E-03	-2.41E+00	-1.43E+00	4.92E+03
	270													2.21E+00		6.92E-02		3.70	3.70E-03	-2.43E+00	-1.16E+00		1.50
	280													3.57E+00		1.26E-01		3.57	3.57E-03	-2.45E+00	-8.99E-01		1.90E-01
	290	2.42E-01												5.70E+00		2.26E-01		3.45	3.45E-03	-2.46E+00	-6.45E-01	-1.86E+01
	298	3.56E-01												8.22E+00	3.56E-01	3.56E-01		3.36	3.36E-03	-2.47E+00	-4.48E-01	2.47E+02
	310	6.38E-01												1.41E+01		6.90E-01		3.23	3.23E-03	-2.49E+00	-1.61E-01	-4.73E+01
	320	1.04E+00												2.19E+01		1.18E+00		3.13	3.13E-03	-2.51E+00	7.09E-02	#N/A
	330													3.37E+01		1.98E+00		3.03	3.03E-03	-2.52E+00	2.96E-01	#N/A
	340													5.13E+01		3.28E+00		2.94	2.94E-03	-2.53E+00	5.16E-01	A	3.28E+00
	350													7.76E+01		5.36E+00		2.86	2.86E-03	-2.54E+00	7.29E-01	4.62E-48	1.00
	375													2.11E+02		1.74E+01		2.67	2.67E-03	-2.57E+00	1.24E+00	n
	400													5.45E+02		5.26E+01		2.50	2.50E-03	-2.60E+00	1.72E+00	18.62
	425													1.35E+03		1.50E+02		2.35	2.35E-03	-2.63E+00	2.17E+00	Ea	1.00
	450													3.22E+03		4.02E+02		2.22	2.22E-03	-2.65E+00	2.60E+00	-568	4.02E+02
	P1
	P2															Ea shift
	P3															1.72E+03
>CHOO. | -CH2-	T													T-dependence	Target	Final		1000/T	1/T	log(1/T)	log(>CHOO. | -CH2-)	log(T)	Replicate
	200													5.81E-02		1.06E-05		5.00	5.00E-03	-2.30E+00	-4.97E+00	A	3.31E-06
	225													2.26E-01		1.07E-04		4.44	4.44E-03	-2.35E+00	-3.97E+00	8.07E+06	0.31
	250													8.24E-01		8.41E-04		4.00	4.00E-03	-2.40E+00	-3.08E+00	Ea
	260													1.36E+00		1.81E-03		3.85	3.85E-03	-2.41E+00	-2.74E+00	5.70E+03
	270													2.21E+00		3.76E-03		3.70	3.70E-03	-2.43E+00	-2.42E+00		1.50
	280													3.57E+00		7.62E-03		3.57	3.57E-03	-2.45E+00	-2.12E+00		1.15E-02
	290													5.70E+00		1.50E-02		3.45	3.45E-03	-2.46E+00	-1.82E+00	-1.86E+01
	298													8.22E+00	2.55E-02	2.55E-02		3.36	3.36E-03	-2.47E+00	-1.59E+00	-9.50E+01
	310													1.41E+01		5.47E-02		3.23	3.23E-03	-2.49E+00	-1.26E+00	-4.73E+01
	320													2.19E+01		1.01E-01		3.13	3.13E-03	-2.51E+00	-9.96E-01	#N/A
	330													3.37E+01		1.83E-01		3.03	3.03E-03	-2.52E+00	-7.38E-01	#N/A
	340													5.13E+01		3.25E-01		2.94	2.94E-03	-2.53E+00	-4.89E-01	A	3.25E-01
	350													7.76E+01		5.67E-01		2.86	2.86E-03	-2.54E+00	-2.46E-01	4.62E-48	1.00
	375													2.11E+02		2.14E+00		2.67	2.67E-03	-2.57E+00	3.30E-01	n
	400													5.45E+02		7.37E+00		2.50	2.50E-03	-2.60E+00	8.67E-01	18.62
	425													1.35E+03		2.35E+01		2.35	2.35E-03	-2.63E+00	1.37E+00	Ea	1.00
	450													3.22E+03		7.01E+01		2.22	2.22E-03	-2.65E+00	1.85E+00	219	7.01E+01
	P1
	P2															Ea shift
	P3															3.83E+02
>CHOO. | >CH-	T													T-dependence	Target	Final		1000/T	1/T	log(1/T)	log(>CHOO. | >CH-)	log(T)	Replicate
	200													5.81E-02		8.55E-03		5.00	5.00E-03	-2.30E+00	-2.07E+00	A	2.67E-03
	225													2.26E-01		4.11E-02		4.44	4.44E-03	-2.35E+00	-1.39E+00	8.07E+06	0.31
	250													8.24E-01		1.78E-01		4.00	4.00E-03	-2.40E+00	-7.50E-01	Ea
	260													1.36E+00		3.11E-01		3.85	3.85E-03	-2.41E+00	-5.08E-01	4.37E+03
	270													2.21E+00		5.34E-01		3.70	3.70E-03	-2.43E+00	-2.72E-01		1.50
	280													3.57E+00		9.07E-01		3.57	3.57E-03	-2.45E+00	-4.24E-02		1.36E+00
	290													5.70E+00		1.52E+00		3.45	3.45E-03	-2.46E+00	1.81E-01	-1.86E+01
	298													8.22E+00	2.27E+00	2.27E+00		3.36	3.36E-03	-2.47E+00	3.56E-01	4.86E+02
	310													1.41E+01		4.10E+00		3.23	3.23E-03	-2.49E+00	6.12E-01	-4.73E+01
	320													2.19E+01		6.61E+00		3.13	3.13E-03	-2.51E+00	8.20E-01	#N/A
	330													3.37E+01		1.05E+01		3.03	3.03E-03	-2.52E+00	1.02E+00	#N/A
	340													5.13E+01		1.66E+01		2.94	2.94E-03	-2.53E+00	1.22E+00	A	1.66E+01
	350													7.76E+01		2.60E+01		2.86	2.86E-03	-2.54E+00	1.41E+00	4.62E-48	1.00
	375													2.11E+02		7.58E+01		2.67	2.67E-03	-2.57E+00	1.88E+00	n
	400													5.45E+02		2.09E+02		2.50	2.50E-03	-2.60E+00	2.32E+00	18.62
	425													1.35E+03		5.48E+02		2.35	2.35E-03	-2.63E+00	2.74E+00	Ea	1.00
	450													3.22E+03		1.37E+03		2.22	2.22E-03	-2.65E+00	3.14E+00	-1120	1.37E+03
	P1
	P2															Ea shift
	P3															2.17E+03
>C(OO.)- | -CH2-	T													T-dependence	Target	Final		1000/T	1/T	log(1/T)	log(>C(OO.)- | -CH2-)	log(T)	Replicate
	200													5.81E-02		1.14E-06		5.00	5.00E-03	-2.30E+00	-5.94E+00	A	3.56E-07
	225													2.26E-01		1.48E-05		4.44	4.44E-03	-2.35E+00	-4.83E+00	8.07E+06	0.31
	250													8.24E-01		1.41E-04		4.00	4.00E-03	-2.40E+00	-3.85E+00	Ea
	260													1.36E+00		3.25E-04		3.85	3.85E-03	-2.41E+00	-3.49E+00	6.15E+03
	270													2.21E+00		7.21E-04		3.70	3.70E-03	-2.43E+00	-3.14E+00		1.50
	280													3.57E+00		1.55E-03		3.57	3.57E-03	-2.45E+00	-2.81E+00		2.33E-03
	290													5.70E+00		3.23E-03		3.45	3.45E-03	-2.46E+00	-2.49E+00	-1.86E+01
	298													8.22E+00	5.70E-03	5.70E-03		3.36	3.36E-03	-2.47E+00	-2.24E+00	-2.89E+02
	310													1.41E+01		1.30E-02		3.23	3.23E-03	-2.49E+00	-1.89E+00	-4.73E+01
	320													2.19E+01		2.50E-02		3.13	3.13E-03	-2.51E+00	-1.60E+00	#N/A
	330													3.37E+01		4.73E-02		3.03	3.03E-03	-2.52E+00	-1.33E+00	#N/A
	340													5.13E+01		8.74E-02		2.94	2.94E-03	-2.53E+00	-1.06E+00	A	8.74E-02
	350													7.76E+01		1.59E-01		2.86	2.86E-03	-2.54E+00	-8.00E-01	4.62E-48	1.00
	375													2.11E+02		6.50E-01		2.67	2.67E-03	-2.57E+00	-1.87E-01	n
	400													5.45E+02		2.41E+00		2.50	2.50E-03	-2.60E+00	3.83E-01	18.62
	425													1.35E+03		8.23E+00		2.35	2.35E-03	-2.63E+00	9.15E-01	Ea	1.00
	450													3.22E+03		2.60E+01		2.22	2.22E-03	-2.65E+00	1.42E+00	665	2.60E+01
	P1
	P2															Ea shift
	P3															8.79E+02
>C(OO.)- | >CH-	T													T-dependence	Target	Final		1000/T	1/T	log(1/T)	log(>C(OO.)- | >CH-)	log(T)	Replicate
	200													5.81E-02		7.16E-04		5.00	5.00E-03	-2.30E+00	-3.15E+00	A	2.23E-04
	225													2.26E-01		4.54E-03		4.44	4.44E-03	-2.35E+00	-2.34E+00	8.07E+06	0.31
	250													8.24E-01		2.44E-02		4.00	4.00E-03	-2.40E+00	-1.61E+00	Ea
	260													1.36E+00		4.61E-02		3.85	3.85E-03	-2.41E+00	-1.34E+00	4.86E+03
	270													2.21E+00		8.51E-02		3.70	3.70E-03	-2.43E+00	-1.07E+00		1.50
	280													3.57E+00		1.54E-01		3.57	3.57E-03	-2.45E+00	-8.12E-01		2.32E-01
	290													5.70E+00		2.75E-01		3.45	3.45E-03	-2.46E+00	-5.61E-01	-1.86E+01
	298													8.22E+00	4.30E-01	4.30E-01		3.36	3.36E-03	-2.47E+00	-3.66E-01	2.71E+02
	310													1.41E+01		8.27E-01		3.23	3.23E-03	-2.49E+00	-8.24E-02	-4.73E+01
	320													2.19E+01		1.40E+00		3.13	3.13E-03	-2.51E+00	1.47E-01	#N/A
	330													3.37E+01		2.34E+00		3.03	3.03E-03	-2.52E+00	3.70E-01	#N/A
	340													5.13E+01		3.87E+00		2.94	2.94E-03	-2.53E+00	5.87E-01	A	3.87E+00
	350													7.76E+01		6.29E+00		2.86	2.86E-03	-2.54E+00	7.99E-01	4.62E-48	1.00
	375													2.11E+02		2.02E+01		2.67	2.67E-03	-2.57E+00	1.31E+00	n
	400													5.45E+02		6.05E+01		2.50	2.50E-03	-2.60E+00	1.78E+00	18.62
	425													1.35E+03		1.71E+02		2.35	2.35E-03	-2.63E+00	2.23E+00	Ea	1.00
	450													3.22E+03		4.56E+02		2.22	2.22E-03	-2.65E+00	2.66E+00	-624	4.56E+02

## Sheet: Plot endo-O2R=C
Unsaturated RO2 with endo-cyclic double bond
1,5 Hshift
	Average temperature dependence															Ea shift
																0.00E+00
	T	>CHOO. | -CH3	>CHOO. | -CH2-	>CHOO. | >CH-	>C(OO.)- | -CH3									T-dependence	Target	Final		1000/T	1/T	log(1/T)	log()	log(T)	Replicate
	200	7.88E-08	1.19E-04	6.33E-04	6.69E-07									7.94E-06		7.94E-06		5.00	5.00E-03	-2.30E+00	-5.10E+00	A	1.06E-06
	225	8.03E-07	5.21E-04	4.69E-03	6.56E-06									5.99E-05		5.99E-05		4.44	4.44E-03	-2.35E+00	-4.22E+00	5.02E+07	0.13
	250	7.59E-06	2.49E-03	3.11E-02	5.89E-05									4.31E-04		4.31E-04		4.00	4.00E-03	-2.40E+00	-3.37E+00	Ea
	260	1.82E-05	4.72E-03	6.42E-02	1.38E-04									9.34E-04		9.34E-04		3.85	3.85E-03	-2.41E+00	-3.03E+00	6.30E+03
	270	4.29E-05	8.93E-03	1.31E-01	3.19E-04									2.00E-03		2.00E-03		3.70	3.70E-03	-2.43E+00	-2.70E+00		2.02
	280	9.98E-05	1.69E-02	2.61E-01	7.23E-04									4.23E-03		4.23E-03		3.57	3.57E-03	-2.45E+00	-2.37E+00		8.56E-03
	290	2.29E-04	3.20E-02	5.14E-01	1.62E-03									8.83E-03		8.83E-03		3.45	3.45E-03	-2.46E+00	-2.05E+00	-3.22E+01
	298	4.39E-04	5.32E-02	8.73E-01	3.04E-03									1.58E-02	1.58E-02	1.58E-02		3.36	3.36E-03	-2.47E+00	-1.80E+00	1.39E+03
	310	1.15E-03	1.14E-01	1.90E+00	7.71E-03									3.72E-02		3.72E-02		3.23	3.23E-03	-2.49E+00	-1.43E+00	-8.61E+01
	320	2.51E-03	2.12E-01	3.58E+00	1.65E-02									7.49E-02		7.49E-02		3.13	3.13E-03	-2.51E+00	-1.13E+00	#N/A
	330	5.43E-03	3.96E-01	6.65E+00	3.47E-02									1.49E-01		1.49E-01		3.03	3.03E-03	-2.52E+00	-8.26E-01	#N/A
	340	1.16E-02	7.32E-01	1.22E+01	7.20E-02									2.94E-01		2.94E-01		2.94	2.94E-03	-2.53E+00	-5.32E-01	A	2.94E-01
	350	2.43E-02	1.35E+00	2.21E+01	1.47E-01									5.71E-01		5.71E-01		2.86	2.86E-03	-2.54E+00	-2.43E-01	7.61E-87	1.00
	375	1.46E-01	6.00E+00	9.22E+01	8.34E-01									2.87E+00		2.87E+00		2.67	2.67E-03	-2.57E+00	4.57E-01	n
	400	8.17E-01	2.57E+01	3.59E+02	4.36E+00									1.35E+01		1.35E+01		2.50	2.50E-03	-2.60E+00	1.13E+00	32.20
	425	4.23E+00	1.05E+02	1.31E+03	2.12E+01									5.93E+01		5.93E+01		2.35	2.35E-03	-2.63E+00	1.77E+00	Ea	1.00
	450	2.05E+01	4.11E+02	4.51E+03	9.66E+01									2.46E+02		2.46E+02		2.22	2.22E-03	-2.65E+00	2.39E+00	-3190	2.46E+02
		CHOOH	CHOOH
	P1	1.91458152442863E-95	3966
	P2	35.0128932557778	2.392													Ea shift
	P3	-3.25E+03	9.40E+03													2.83E+02
>CHOO. | -CH3	T	Vereecken 2019	Zhang and Dibble 2011											T-dependence	Target	Final		1000/T	1/T	log(1/T)	log(>CHOO. | -CH3)	log(T)	Replicate
	200	7.88E-08	4.90E-12											7.88E-08		1.92E-08		5.00	5.00E-03	-2.30E+00	-7.72E+00	A	2.14E-09
	225	8.03E-07	1.20E-09											8.03E-07		2.28E-07		4.44	4.44E-03	-2.35E+00	-6.64E+00	2.00E+07	0.11
	250	7.59E-06	1.01E-07											7.59E-06		2.45E-06		4.00	4.00E-03	-2.40E+00	-5.61E+00	Ea
	260	1.82E-05	4.72E-07											1.82E-05		6.12E-06		3.85	3.85E-03	-2.41E+00	-5.21E+00	7.35E+03
	270	4.29E-05	1.97E-06											4.29E-05		1.50E-05		3.70	3.70E-03	-2.43E+00	-4.82E+00		2.15
	280	9.98E-05	7.45E-06											9.98E-05		3.63E-05		3.57	3.57E-03	-2.45E+00	-4.44E+00		7.82E-05
	290	2.29E-04	2.58E-05											2.29E-04		8.62E-05		3.45	3.45E-03	-2.46E+00	-4.06E+00	-3.50E+01
	298	4.39E-04	6.57E-05											4.39E-04	1.70E-04	1.70E-04		3.36	3.36E-03	-2.47E+00	-3.77E+00	1.29E+03
	310	1.15E-03	2.45E-04											1.15E-03		4.60E-04		3.23	3.23E-03	-2.49E+00	-3.34E+00	-9.47E+01
	320	2.51E-03	6.81E-04											2.51E-03		1.04E-03		3.13	3.13E-03	-2.51E+00	-2.98E+00	#N/A
	330	5.43E-03	1.79E-03											5.43E-03		2.30E-03		3.03	3.03E-03	-2.52E+00	-2.64E+00	#N/A
	340	1.16E-02	4.43E-03											1.16E-02		5.03E-03		2.94	2.94E-03	-2.53E+00	-2.30E+00	A	5.03E-03
	350	2.43E-02	1.05E-02											2.43E-02		1.08E-02		2.86	2.86E-03	-2.54E+00	-1.97E+00	1.91E-95	1.00
	375	1.46E-01	7.40E-02											1.46E-01		6.89E-02		2.67	2.67E-03	-2.57E+00	-1.16E+00	n
	400	8.17E-01	4.14E-01											8.17E-01		4.03E-01		2.50	2.50E-03	-2.60E+00	-3.95E-01	35.01
	425	4.23E+00	1.90E+00											4.23E+00		2.18E+00		2.35	2.35E-03	-2.63E+00	3.38E-01	Ea	1.00
	450	2.05E+01	7.46E+00											2.05E+01		1.09E+01		2.22	2.22E-03	-2.65E+00	1.04E+00	-2963	1.09E+01
		CHOOH	CHOOH
	P1	2.30645682607467E-94	67920
	P2	34.5766241196897	2.058													Ea shift
	P3	-4.67E+03	8.31E+03													3.14E+02
>CHOO. | -CH2-	T	Vereecken 2019	Zhang and Dibble 2011											T-dependence	Target	Final		1000/T	1/T	log(1/T)	log(>CHOO. | -CH2-)	log(T)	Replicate
	200	1.19E-04	3.31E-09											1.19E-04		2.48E-05		5.00	5.00E-03	-2.30E+00	-4.60E+00	A	2.85E-06
	225	5.21E-04	4.27E-07											5.21E-04		1.29E-04		4.44	4.44E-03	-2.35E+00	-3.89E+00	1.29E+07	0.11
	250	2.49E-03	2.13E-05											2.49E-03		7.11E-04		4.00	4.00E-03	-2.40E+00	-3.15E+00	Ea
	260	4.72E-03	8.31E-05											4.72E-03		1.41E-03		3.85	3.85E-03	-2.41E+00	-2.85E+00	5.83E+03
	270	8.93E-03	2.93E-04											8.93E-03		2.80E-03		3.70	3.70E-03	-2.43E+00	-2.55E+00		2.13
	280	1.69E-02	9.49E-04											1.69E-02		5.52E-03		3.57	3.57E-03	-2.45E+00	-2.26E+00		1.18E-02
	290	3.20E-02	2.84E-03											3.20E-02		1.09E-02		3.45	3.45E-03	-2.46E+00	-1.96E+00	-3.46E+01
	298	5.32E-02	6.48E-03											5.32E-02	1.86E-02	1.86E-02		3.36	3.36E-03	-2.47E+00	-1.73E+00	1.89E+03
	310	1.14E-01	2.07E-02											1.14E-01		4.13E-02		3.23	3.23E-03	-2.49E+00	-1.38E+00	-9.36E+01
	320	2.12E-01	5.11E-02											2.12E-01		7.97E-02		3.13	3.13E-03	-2.51E+00	-1.10E+00	#N/A
	330	3.96E-01	1.20E-01											3.96E-01		1.53E-01		3.03	3.03E-03	-2.52E+00	-8.16E-01	#N/A
	340	7.32E-01	2.67E-01											7.32E-01		2.91E-01		2.94	2.94E-03	-2.53E+00	-5.36E-01	A	2.91E-01
	350	1.35E+00	5.69E-01											1.35E+00		5.49E-01		2.86	2.86E-03	-2.54E+00	-2.60E-01	2.31E-94	1.00
	375	6.00E+00	3.19E+00											6.00E+00		2.60E+00		2.67	2.67E-03	-2.57E+00	4.15E-01	n
	400	2.57E+01	1.46E+01											2.57E+01		1.17E+01		2.50	2.50E-03	-2.60E+00	1.07E+00	34.58
	425	1.05E+02	5.60E+01											1.05E+02		5.02E+01		2.35	2.35E-03	-2.63E+00	1.70E+00	Ea	1.00
	450	4.11E+02	1.87E+02											4.11E+02		2.05E+02		2.22	2.22E-03	-2.65E+00	2.31E+00	-4361	2.05E+02
		CHOOH
	P1	7.44048561520314E-68
	P2	25.9849915156887														Ea shift
	P3	-1.91E+03														0.00E+00
>CHOO. | >CH-	T	Vereecken 2019												T-dependence	Target	Final		1000/T	1/T	log(1/T)	log(>CHOO. | >CH-)	log(T)	Replicate
	200	6.33E-04												6.33E-04		6.33E-04		5.00	5.00E-03	-2.30E+00	-3.20E+00	A	1.25E-04
	225	4.69E-03												4.69E-03		4.69E-03		4.44	4.44E-03	-2.35E+00	-2.33E+00	3.85E+08	0.20
	250	3.11E-02												3.11E-02		3.11E-02		4.00	4.00E-03	-2.40E+00	-1.51E+00	Ea
	260	6.42E-02												6.42E-02		6.42E-02		3.85	3.85E-03	-2.41E+00	-1.19E+00	5.75E+03
	270	1.31E-01												1.31E-01		1.31E-01		3.70	3.70E-03	-2.43E+00	-8.84E-01		1.77
	280	2.61E-01												2.61E-01		2.61E-01		3.57	3.57E-03	-2.45E+00	-5.83E-01		4.61E-01
	290	5.14E-01												5.14E-01		5.14E-01		3.45	3.45E-03	-2.46E+00	-2.89E-01	-2.60E+01
	298	8.73E-01												8.73E-01	8.73E-01	8.73E-01		3.36	3.36E-03	-2.47E+00	-5.88E-02	8.28E+02
	310	1.90E+00												1.90E+00		1.90E+00		3.23	3.23E-03	-2.49E+00	2.79E-01	-6.71E+01
	320	3.58E+00												3.58E+00		3.58E+00		3.13	3.13E-03	-2.51E+00	5.54E-01	#N/A
	330	6.65E+00												6.65E+00		6.65E+00		3.03	3.03E-03	-2.52E+00	8.23E-01	#N/A
	340	1.22E+01												1.22E+01		1.22E+01		2.94	2.94E-03	-2.53E+00	1.09E+00	A	1.22E+01
	350	2.21E+01												2.21E+01		2.21E+01		2.86	2.86E-03	-2.54E+00	1.34E+00	7.44E-68	1.00
	375	9.22E+01												9.22E+01		9.22E+01		2.67	2.67E-03	-2.57E+00	1.96E+00	n
	400	3.59E+02												3.59E+02		3.59E+02		2.50	2.50E-03	-2.60E+00	2.56E+00	25.98
	425	1.31E+03												1.31E+03		1.31E+03		2.35	2.35E-03	-2.63E+00	3.12E+00	Ea	1.00
	450	4.51E+03												4.51E+03		4.51E+03		2.22	2.22E-03	-2.65E+00	3.65E+00	-1906	4.51E+03
		C(CH3)OOH
	P1	1.01915132983945E-89
	P2	33.2217861784454														Ea shift
	P3	-2.93E+03														0.00E+00
>C(OO.)- | -CH3	T	Vereecken 2019												T-dependence	Target	Final		1000/T	1/T	log(1/T)	log(>C(OO.)- | -CH3)	log(T)	Replicate
	200	6.69E-07												6.69E-07		6.69E-07		5.00	5.00E-03	-2.30E+00	-6.17E+00	A	8.37E-08
	225	6.56E-06												6.56E-06		6.56E-06		4.44	4.44E-03	-2.35E+00	-5.18E+00	6.42E+07	0.13
	250	5.89E-05												5.89E-05		5.89E-05		4.00	4.00E-03	-2.40E+00	-4.23E+00	Ea
	260	1.38E-04												1.38E-04		1.38E-04		3.85	3.85E-03	-2.41E+00	-3.86E+00	6.85E+03
	270	3.19E-04												3.19E-04		3.19E-04		3.70	3.70E-03	-2.43E+00	-3.50E+00		2.07
	280	7.23E-04												7.23E-04		7.23E-04		3.57	3.57E-03	-2.45E+00	-3.14E+00		1.50E-03
	290	1.62E-03												1.62E-03		1.62E-03		3.45	3.45E-03	-2.46E+00	-2.79E+00	-3.32E+01
	298	3.04E-03												3.04E-03	3.04E-03	3.04E-03		3.36	3.36E-03	-2.47E+00	-2.52E+00	1.27E+03
	310	7.71E-03												7.71E-03		7.71E-03		3.23	3.23E-03	-2.49E+00	-2.11E+00	-8.90E+01
	320	1.65E-02												1.65E-02		1.65E-02		3.13	3.13E-03	-2.51E+00	-1.78E+00	#N/A
	330	3.47E-02												3.47E-02		3.47E-02		3.03	3.03E-03	-2.52E+00	-1.46E+00	#N/A
	340	7.20E-02												7.20E-02		7.20E-02		2.94	2.94E-03	-2.53E+00	-1.14E+00	A	7.20E-02
	350	1.47E-01												1.47E-01		1.47E-01		2.86	2.86E-03	-2.54E+00	-8.32E-01	1.02E-89	1.00
	375	8.34E-01												8.34E-01		8.34E-01		2.67	2.67E-03	-2.57E+00	-7.90E-02	n
	400	4.36E+00												4.36E+00		4.36E+00		2.50	2.50E-03	-2.60E+00	6.40E-01	33.22
	425	2.12E+01												2.12E+01		2.12E+01		2.35	2.35E-03	-2.63E+00	1.33E+00	Ea	1.00
	450	9.66E+01												9.66E+01		9.66E+01		2.22	2.22E-03	-2.65E+00	1.99E+00	-2935	9.66E+01
	P1
	P2															Ea shift
	P3															2.81E+02
>C(OO.)- | -CH2-	T													T-dependence	Target	Final		1000/T	1/T	log(1/T)	log(>C(OO.)- | -CH2-)	log(T)	Replicate
	200													7.94E-06		1.95E-06		5.00	5.00E-03	-2.30E+00	-5.71E+00	A	2.60E-07
	225													5.99E-05		1.72E-05		4.44	4.44E-03	-2.35E+00	-4.76E+00	5.02E+07	0.13
	250													4.31E-04		1.40E-04		4.00	4.00E-03	-2.40E+00	-3.85E+00	Ea
	260													9.34E-04		3.17E-04		3.85	3.85E-03	-2.41E+00	-3.50E+00	6.58E+03
	270													2.00E-03		7.06E-04		3.70	3.70E-03	-2.43E+00	-3.15E+00		2.02
	280													4.23E-03		1.55E-03		3.57	3.57E-03	-2.45E+00	-2.81E+00		3.14E-03
	290													8.83E-03		3.35E-03		3.45	3.45E-03	-2.46E+00	-2.47E+00	-3.22E+01
	298													1.58E-02	6.15E-03	6.15E-03		3.36	3.36E-03	-2.47E+00	-2.21E+00	1.26E+03
	310													3.72E-02		1.50E-02		3.23	3.23E-03	-2.49E+00	-1.82E+00	-8.61E+01
	320													7.49E-02		3.12E-02		3.13	3.13E-03	-2.51E+00	-1.51E+00	#N/A
	330													1.49E-01		6.37E-02		3.03	3.03E-03	-2.52E+00	-1.20E+00	#N/A
	340													2.94E-01		1.29E-01		2.94	2.94E-03	-2.53E+00	-8.91E-01	A	1.29E-01
	350													5.71E-01		2.56E-01		2.86	2.86E-03	-2.54E+00	-5.92E-01	7.61E-87	1.00
	375													2.87E+00		1.36E+00		2.67	2.67E-03	-2.57E+00	1.32E-01	n
	400													1.35E+01		6.67E+00		2.50	2.50E-03	-2.60E+00	8.24E-01	32.20
	425													5.93E+01		3.06E+01		2.35	2.35E-03	-2.63E+00	1.49E+00	Ea	1.00
	450													2.46E+02		1.32E+02		2.22	2.22E-03	-2.65E+00	2.12E+00	-2910	1.32E+02
	P1
	P2															Ea shift
	P3															1.84E+02
>C(OO.)- | >CH-	T													T-dependence	Target	Final		1000/T	1/T	log(1/T)	log(>C(OO.)- | >CH-)	log(T)	Replicate
	200													7.94E-06		3.16E-06		5.00	5.00E-03	-2.30E+00	-5.50E+00	A	4.21E-07
	225													5.99E-05		2.64E-05		4.44	4.44E-03	-2.35E+00	-4.58E+00	5.02E+07	0.13
	250													4.31E-04		2.06E-04		4.00	4.00E-03	-2.40E+00	-3.69E+00	Ea
	260													9.34E-04		4.59E-04		3.85	3.85E-03	-2.41E+00	-3.34E+00	6.48E+03
	270													2.00E-03		1.01E-03		3.70	3.70E-03	-2.43E+00	-3.00E+00		2.02
	280													4.23E-03		2.19E-03		3.57	3.57E-03	-2.45E+00	-2.66E+00		4.43E-03
	290													8.83E-03		4.67E-03		3.45	3.45E-03	-2.46E+00	-2.33E+00	-3.22E+01
	298													1.58E-02	8.50E-03	8.50E-03		3.36	3.36E-03	-2.47E+00	-2.07E+00	1.31E+03
	310													3.72E-02		2.05E-02		3.23	3.23E-03	-2.49E+00	-1.69E+00	-8.61E+01
	320													7.49E-02		4.21E-02		3.13	3.13E-03	-2.51E+00	-1.38E+00	#N/A
	330													1.49E-01		8.53E-02		3.03	3.03E-03	-2.52E+00	-1.07E+00	#N/A
	340													2.94E-01		1.71E-01		2.94	2.94E-03	-2.53E+00	-7.68E-01	A	1.71E-01
	350													5.71E-01		3.37E-01		2.86	2.86E-03	-2.54E+00	-4.72E-01	7.61E-87	1.00
	375													2.87E+00		1.75E+00		2.67	2.67E-03	-2.57E+00	2.44E-01	n
	400													1.35E+01		8.49E+00		2.50	2.50E-03	-2.60E+00	9.29E-01	32.20
	425													5.93E+01		3.84E+01		2.35	2.35E-03	-2.63E+00	1.58E+00	Ea	1.00
	450													2.46E+02		1.63E+02		2.22	2.22E-03	-2.65E+00	2.21E+00	-3006	1.63E+02
1,6 Hshift
	Average temperature dependence															Ea shift
																0.00E+00
	T	-CH2OO. | -CH3	-CH2OO. | -CH2-	-CH2OO. | >CH-										T-dependence	Target	Final		1000/T	1/T	log(1/T)	log()	log(T)	Replicate
	200	9.33E-05	2.83E-04	8.72E-02										1.32E-03		1.32E-03		5.00	5.00E-03	-2.30E+00	-2.88E+00	A	2.75E-04
	225	4.13E-04	1.27E-03	3.33E-01										5.59E-03		5.59E-03		4.44	4.44E-03	-2.35E+00	-2.25E+00	3.81E+06	0.21
	250	1.84E-03	5.66E-03	1.24E+00										2.35E-02		2.35E-02		4.00	4.00E-03	-2.40E+00	-1.63E+00	Ea
	260	3.34E-03	1.02E-02	2.07E+00										4.13E-02		4.13E-02		3.85	3.85E-03	-2.41E+00	-1.38E+00	4.67E+03
	270	6.02E-03	1.82E-02	3.44E+00										7.22E-02		7.22E-02		3.70	3.70E-03	-2.43E+00	-1.14E+00		1.73
	280	1.08E-02	3.23E-02	5.66E+00										1.25E-01		1.25E-01		3.57	3.57E-03	-2.45E+00	-9.02E-01		2.17E-01
	290	1.92E-02	5.69E-02	9.26E+00										2.16E-01		2.16E-01		3.45	3.45E-03	-2.46E+00	-6.65E-01	-2.51E+01
	298	3.03E-02	8.90E-02	1.37E+01										3.33E-01	3.33E-01	3.33E-01		3.36	3.36E-03	-2.47E+00	-4.78E-01	1.18E+03
	310	5.97E-02	1.72E-01	2.42E+01										6.29E-01		6.29E-01		3.23	3.23E-03	-2.49E+00	-2.01E-01	-6.65E+01
	320	1.04E-01	2.96E-01	3.87E+01										1.06E+00		1.06E+00		3.13	3.13E-03	-2.51E+00	2.55E-02	#N/A
	330	1.80E-01	5.05E-01	6.14E+01										1.77E+00		1.77E+00		3.03	3.03E-03	-2.52E+00	2.49E-01	#N/A
	340	3.09E-01	8.53E-01	9.65E+01										2.94E+00		2.94E+00		2.94	2.94E-03	-2.53E+00	4.69E-01	A	2.94E+00
	350	5.27E-01	1.43E+00	1.51E+02										4.84E+00		4.84E+00		2.86	2.86E-03	-2.54E+00	6.85E-01	3.42E-67	1.00
	375	1.93E+00	5.02E+00	4.45E+02										1.63E+01		1.63E+01		2.67	2.67E-03	-2.57E+00	1.21E+00	n
	400	6.74E+00	1.68E+01	1.25E+03										5.22E+01		5.22E+01		2.50	2.50E-03	-2.60E+00	1.72E+00	25.07
	425	2.25E+01	5.36E+01	3.39E+03										1.60E+02		1.60E+02		2.35	2.35E-03	-2.63E+00	2.20E+00	Ea	1.00
	450	7.19E+01	1.64E+02	8.82E+03										4.70E+02		4.70E+02		2.22	2.22E-03	-2.65E+00	2.67E+00	-2717	4.70E+02
		s	t
	P1	3.93907321129368E-75	5.48704979444612E-75
	P2	27.5685734146347	27.5592818237417													Ea shift
	P3	-3.12E+03	-3.22E+03													0.00E+00
-CH2OO. | -CH3	T	Vereecken 2019	Vereecken 2019											T-dependence	Target	Final		1000/T	1/T	log(1/T)	log(-CH2OO. | -CH3)	log(T)	Replicate
	200	6.25E-05	1.39E-04											9.33E-05		9.33E-05		5.00	5.00E-03	-2.30E+00	-4.03E+00	A	1.66E-05
	225	2.85E-04	5.98E-04											4.13E-04		4.13E-04		4.44	4.44E-03	-2.35E+00	-3.38E+00	9.58E+05	0.18
	250	1.30E-03	2.61E-03											1.84E-03		1.84E-03		4.00	4.00E-03	-2.40E+00	-2.73E+00	Ea
	260	2.38E-03	4.69E-03											3.34E-03		3.34E-03		3.85	3.85E-03	-2.41E+00	-2.48E+00	4.96E+03
	270	4.32E-03	8.39E-03											6.02E-03		6.02E-03		3.70	3.70E-03	-2.43E+00	-2.22E+00		1.83
	280	7.79E-03	1.49E-02											1.08E-02		1.08E-02		3.57	3.57E-03	-2.45E+00	-1.97E+00		1.97E-02
	290	1.40E-02	2.64E-02											1.92E-02		1.92E-02		3.45	3.45E-03	-2.46E+00	-1.72E+00	-2.76E+01
	298	2.22E-02	4.15E-02											3.03E-02	3.03E-02	3.03E-02		3.36	3.36E-03	-2.47E+00	-1.52E+00	1.38E+03
	310	4.39E-02	8.11E-02											5.97E-02		5.97E-02		3.23	3.23E-03	-2.49E+00	-1.22E+00	-7.43E+01
	320	7.70E-02	1.41E-01											1.04E-01		1.04E-01		3.13	3.13E-03	-2.51E+00	-9.83E-01	#N/A
	330	1.34E-01	2.42E-01											1.80E-01		1.80E-01		3.03	3.03E-03	-2.52E+00	-7.45E-01	#N/A
	340	2.31E-01	4.14E-01											3.09E-01		3.09E-01		2.94	2.94E-03	-2.53E+00	-5.10E-01	A	3.09E-01
	350	3.95E-01	7.02E-01											5.27E-01		5.27E-01		2.86	2.86E-03	-2.54E+00	-2.78E-01	4.65E-75	1.00
	375	1.46E+00	2.54E+00											1.93E+00		1.93E+00		2.67	2.67E-03	-2.57E+00	2.86E-01	n
	400	5.16E+00	8.81E+00											6.74E+00		6.74E+00		2.50	2.50E-03	-2.60E+00	8.29E-01	27.56
	425	1.74E+01	2.92E+01											2.25E+01		2.25E+01		2.35	2.35E-03	-2.63E+00	1.35E+00	Ea	1.00
	450	5.59E+01	9.26E+01											7.19E+01		7.19E+01		2.22	2.22E-03	-2.65E+00	1.86E+00	-3167	7.19E+01
		s	s (rel)	s
	P1	2.2926500484689E-69	2.2681985879878E-70	44670
	P2	25.7413395870727	26.0244218442032	1.292												Ea shift
	P3	-3.27E+03	-2.29E+03	7.17E+03												-5.93E+02
-CH2OO. | -CH2-	T	Vereecken 2019	Vereecken 2019 (relative)	Zhang and Dibble 2011										T-dependence	Target	Final		1000/T	1/T	log(1/T)	log(-CH2OO. | -CH2-)	log(T)	Replicate
	200	4.88E-03	1.64E-05	1.13E-08										2.83E-04		5.48E-03		5.00	5.00E-03	-2.30E+00	-2.26E+00	A	1.08E-03
	225	1.65E-02	9.86E-05	7.07E-07										1.27E-03		1.77E-02		4.44	4.44E-03	-2.35E+00	-1.75E+00	1.88E+06	0.20
	250	5.81E-02	5.52E-04	1.96E-05										5.66E-03		6.06E-02		4.00	4.00E-03	-2.40E+00	-1.22E+00	Ea
	260	9.64E-02	1.08E-03	6.22E-05										1.02E-02		9.95E-02		3.85	3.85E-03	-2.41E+00	-1.00E+00	4.25E+03
	270	1.60E-01	2.08E-03	1.81E-04										1.82E-02		1.63E-01		3.70	3.70E-03	-2.43E+00	-7.87E-01		1.76
	280	2.65E-01	3.95E-03	4.91E-04										3.23E-02		2.68E-01		3.57	3.57E-03	-2.45E+00	-5.71E-01		4.73E-01
	290	4.37E-01	7.42E-03	1.24E-03										5.69E-02		4.39E-01		3.45	3.45E-03	-2.46E+00	-3.57E-01	-2.59E+01
	298	6.50E-01	1.22E-02	2.50E-03	Zhang and Dibble value is strongly different due to missed low-energy TS conformer. The Vereecken relative value is not used for k(298K)									8.90E-02	6.50E-01	6.50E-01		3.36	3.36E-03	-2.47E+00	-1.87E-01	1.46E+03
	310	1.17E+00	2.53E-02	6.67E-03										1.72E-01		1.17E+00		3.23	3.23E-03	-2.49E+00	6.64E-02	-6.91E+01
	320	1.91E+00	4.58E-02	1.43E-02										2.96E-01		1.89E+00		3.13	3.13E-03	-2.51E+00	2.76E-01	#N/A
	330	3.10E+00	8.22E-02	2.94E-02										5.05E-01		3.04E+00		3.03	3.03E-03	-2.52E+00	4.83E-01	#N/A
	340	5.00E+00	1.46E-01	5.78E-02										8.53E-01		4.87E+00		2.94	2.94E-03	-2.53E+00	6.88E-01	A	4.87E+00
	350	8.00E+00	2.56E-01	1.10E-01										1.43E+00		7.77E+00		2.86	2.86E-03	-2.54E+00	8.91E-01	7.21E-70	1.00
	375	2.54E+01	9.95E-01	4.70E-01										5.02E+00		2.44E+01		2.67	2.67E-03	-2.57E+00	1.39E+00	n
	400	7.75E+01	3.64E+00	1.69E+00										1.68E+01		7.39E+01		2.50	2.50E-03	-2.60E+00	1.87E+00	25.88
	425	2.28E+02	1.26E+01	5.24E+00										5.36E+01		2.16E+02		2.35	2.35E-03	-2.63E+00	2.33E+00	Ea	1.00
	450	6.48E+02	4.13E+01	1.44E+01										1.64E+02		6.10E+02		2.22	2.22E-03	-2.65E+00	2.79E+00	-3373	6.10E+02
		s
	P1	1.19713226477867E-56
	P2	21.7622670257588														Ea shift
	P3	-2.20E+03														0.00E+00
-CH2OO. | >CH-	T	Vereecken 2019												T-dependence	Target	Final		1000/T	1/T	log(1/T)	log(-CH2OO. | >CH-)	log(T)	Replicate
	200	8.72E-02												8.72E-02		8.72E-02		5.00	5.00E-03	-2.30E+00	-1.06E+00	A	2.23E-02
	225	3.33E-01												3.33E-01		3.33E-01		4.44	4.44E-03	-2.35E+00	-4.78E-01	3.07E+07	0.26
	250	1.24E+00												1.24E+00		1.24E+00		4.00	4.00E-03	-2.40E+00	9.23E-02	Ea
	260	2.07E+00												2.07E+00		2.07E+00		3.85	3.85E-03	-2.41E+00	3.16E-01	4.21E+03
	270	3.44E+00												3.44E+00		3.44E+00		3.70	3.70E-03	-2.43E+00	5.36E-01		1.61
	280	5.66E+00												5.66E+00		5.66E+00		3.57	3.57E-03	-2.45E+00	7.53E-01		9.12E+00
	290	9.26E+00												9.26E+00		9.26E+00		3.45	3.45E-03	-2.46E+00	9.67E-01	-2.18E+01
	298	1.37E+01												1.37E+01	1.37E+01	1.37E+01		3.36	3.36E-03	-2.47E+00	1.14E+00	9.57E+02
	310	2.42E+01												2.42E+01		2.42E+01		3.23	3.23E-03	-2.49E+00	1.38E+00	-5.59E+01
	320	3.87E+01												3.87E+01		3.87E+01		3.13	3.13E-03	-2.51E+00	1.59E+00	#N/A
	330	6.14E+01												6.14E+01		6.14E+01		3.03	3.03E-03	-2.52E+00	1.79E+00	#N/A
	340	9.65E+01												9.65E+01		9.65E+01		2.94	2.94E-03	-2.53E+00	1.98E+00	A	9.65E+01
	350	1.51E+02												1.51E+02		1.51E+02		2.86	2.86E-03	-2.54E+00	2.18E+00	1.20E-56	1.00
	375	4.45E+02												4.45E+02		4.45E+02		2.67	2.67E-03	-2.57E+00	2.65E+00	n
	400	1.25E+03												1.25E+03		1.25E+03		2.50	2.50E-03	-2.60E+00	3.10E+00	21.76
	425	3.39E+03												3.39E+03		3.39E+03		2.35	2.35E-03	-2.63E+00	3.53E+00	Ea	1.00
	450	8.82E+03												8.82E+03		8.82E+03		2.22	2.22E-03	-2.65E+00	3.95E+00	-2204	8.82E+03
	P1
	P2															Ea shift
	P3															9.14E+02
>CHOO. | -CH3	T													T-dependence	Target	Final		1000/T	1/T	log(1/T)	log(>CHOO. | -CH3)	log(T)	Replicate
	200													1.32E-03		1.37E-05		5.00	5.00E-03	-2.30E+00	-4.86E+00	A	2.84E-06
	225													5.59E-03		9.61E-05		4.44	4.44E-03	-2.35E+00	-4.02E+00	3.81E+06	0.21
	250													2.35E-02		6.05E-04		4.00	4.00E-03	-2.40E+00	-3.22E+00	Ea
	260													4.13E-02		1.23E-03		3.85	3.85E-03	-2.41E+00	-2.91E+00	5.58E+03
	270													7.22E-02		2.44E-03		3.70	3.70E-03	-2.43E+00	-2.61E+00		1.73
	280													1.25E-01		4.79E-03		3.57	3.57E-03	-2.45E+00	-2.32E+00		8.30E-03
	290													2.16E-01		9.25E-03		3.45	3.45E-03	-2.46E+00	-2.03E+00	-2.51E+01
	298													3.33E-01	1.55E-02	1.55E-02		3.36	3.36E-03	-2.47E+00	-1.81E+00	7.83E+02
	310													6.29E-01		3.30E-02		3.23	3.23E-03	-2.49E+00	-1.48E+00	-6.65E+01
	320													1.06E+00		6.09E-02		3.13	3.13E-03	-2.51E+00	-1.22E+00	#N/A
	330													1.77E+00		1.11E-01		3.03	3.03E-03	-2.52E+00	-9.54E-01	#N/A
	340													2.94E+00		2.00E-01		2.94	2.94E-03	-2.53E+00	-6.99E-01	A	2.00E-01
	350													4.84E+00		3.55E-01		2.86	2.86E-03	-2.54E+00	-4.49E-01	3.42E-67	1.00
	375													1.63E+01		1.42E+00		2.67	2.67E-03	-2.57E+00	1.53E-01	n
	400													5.22E+01		5.31E+00		2.50	2.50E-03	-2.60E+00	7.25E-01	25.07
	425													1.60E+02		1.86E+01		2.35	2.35E-03	-2.63E+00	1.27E+00	Ea	1.00
	450													4.70E+02		6.16E+01		2.22	2.22E-03	-2.65E+00	1.79E+00	-1803	6.16E+01
	P1
	P2															Ea shift
	P3															-3.11E+02
>CHOO. | -CH2-	T													T-dependence	Target	Final		1000/T	1/T	log(1/T)	log(>CHOO. | -CH2-)	log(T)	Replicate
	200													1.32E-03		6.26E-03		5.00	5.00E-03	-2.30E+00	-2.20E+00	A	1.30E-03
	225													5.59E-03		2.23E-02		4.44	4.44E-03	-2.35E+00	-1.65E+00	3.81E+06	0.21
	250													2.35E-02		8.14E-02		4.00	4.00E-03	-2.40E+00	-1.09E+00	Ea
	260													4.13E-02		1.37E-01		3.85	3.85E-03	-2.41E+00	-8.64E-01	4.36E+03
	270													7.22E-02		2.29E-01		3.70	3.70E-03	-2.43E+00	-6.41E-01		1.73
	280													1.25E-01		3.81E-01		3.57	3.57E-03	-2.45E+00	-4.19E-01		6.60E-01
	290													2.16E-01		6.33E-01		3.45	3.45E-03	-2.46E+00	-1.99E-01	-2.51E+01
	298													3.33E-01	9.46E-01	9.46E-01		3.36	3.36E-03	-2.47E+00	-2.43E-02	1.32E+03
	310													6.29E-01		1.72E+00		3.23	3.23E-03	-2.49E+00	2.35E-01	-6.65E+01
	320													1.06E+00		2.80E+00		3.13	3.13E-03	-2.51E+00	4.48E-01	#N/A
	330													1.77E+00		4.55E+00		3.03	3.03E-03	-2.52E+00	6.58E-01	#N/A
	340													2.94E+00		7.35E+00		2.94	2.94E-03	-2.53E+00	8.66E-01	A	7.35E+00
	350													4.84E+00		1.18E+01		2.86	2.86E-03	-2.54E+00	1.07E+00	3.42E-67	1.00
	375													1.63E+01		3.73E+01		2.67	2.67E-03	-2.57E+00	1.57E+00	n
	400													5.22E+01		1.14E+02		2.50	2.50E-03	-2.60E+00	2.06E+00	25.07
	425													1.60E+02		3.33E+02		2.35	2.35E-03	-2.63E+00	2.52E+00	Ea	1.00
	450													4.70E+02		9.38E+02		2.22	2.22E-03	-2.65E+00	2.97E+00	-3028	9.38E+02
	P1
	P2															Ea shift
	P3															-1.64E+03
>CHOO. | >CH-	T													T-dependence	Target	Final		1000/T	1/T	log(1/T)	log(>CHOO. | >CH-)	log(T)	Replicate
	200													1.32E-03		4.86E+00		5.00	5.00E-03	-2.30E+00	6.86E-01	A	1.01E+00
	225													5.59E-03		8.26E+00		4.44	4.44E-03	-2.35E+00	9.17E-01	3.81E+06	0.21
	250													2.35E-02		1.67E+01		4.00	4.00E-03	-2.40E+00	1.22E+00	Ea
	260													4.13E-02		2.28E+01		3.85	3.85E-03	-2.41E+00	1.36E+00	3.03E+03
	270													7.22E-02		3.16E+01		3.70	3.70E-03	-2.43E+00	1.50E+00		1.73
	280													1.25E-01		4.42E+01		3.57	3.57E-03	-2.45E+00	1.65E+00		7.65E+01
	290													2.16E-01		6.23E+01		3.45	3.45E-03	-2.46E+00	1.79E+00	-2.51E+01
	298													3.33E-01	8.23E+01	8.23E+01		3.36	3.36E-03	-2.47E+00	1.92E+00	1.89E+03
	310													6.29E-01		1.26E+02		3.23	3.23E-03	-2.49E+00	2.10E+00	-6.65E+01
	320													1.06E+00		1.79E+02		3.13	3.13E-03	-2.51E+00	2.25E+00	#N/A
	330													1.77E+00		2.57E+02		3.03	3.03E-03	-2.52E+00	2.41E+00	#N/A
	340													2.94E+00		3.68E+02		2.94	2.94E-03	-2.53E+00	2.57E+00	A	3.68E+02
	350													4.84E+00		5.28E+02		2.86	2.86E-03	-2.54E+00	2.72E+00	3.42E-67	1.00
	375													1.63E+01		1.30E+03		2.67	2.67E-03	-2.57E+00	3.11E+00	n
	400													5.22E+01		3.16E+03		2.50	2.50E-03	-2.60E+00	3.50E+00	25.07
	425													1.60E+02		7.62E+03		2.35	2.35E-03	-2.63E+00	3.88E+00	Ea	1.00
	450													4.70E+02		1.81E+04		2.22	2.22E-03	-2.65E+00	4.26E+00	-4359	1.81E+04
	P1
	P2															Ea shift
	P3															1.40E+03
>C(OO.)- | -CH3	T													T-dependence	Target	Final		1000/T	1/T	log(1/T)	log(>C(OO.)- | -CH3)	log(T)	Replicate
	200													1.32E-03		1.18E-06		5.00	5.00E-03	-2.30E+00	-5.93E+00	A	2.45E-07
	225													5.59E-03		1.09E-05		4.44	4.44E-03	-2.35E+00	-4.96E+00	3.81E+06	0.21
	250													2.35E-02		8.52E-05		4.00	4.00E-03	-2.40E+00	-4.07E+00	Ea
	260													4.13E-02		1.86E-04		3.85	3.85E-03	-2.41E+00	-3.73E+00	6.07E+03
	270													7.22E-02		3.98E-04		3.70	3.70E-03	-2.43E+00	-3.40E+00		1.73
	280													1.25E-01		8.32E-04		3.57	3.57E-03	-2.45E+00	-3.08E+00		1.44E-03
	290													2.16E-01		1.71E-03		3.45	3.45E-03	-2.46E+00	-2.77E+00	-2.51E+01
	298													3.33E-01	2.99E-03	2.99E-03		3.36	3.36E-03	-2.47E+00	-2.52E+00	5.70E+02
	310													6.29E-01		6.78E-03		3.23	3.23E-03	-2.49E+00	-2.17E+00	-6.65E+01
	320													1.06E+00		1.32E-02		3.13	3.13E-03	-2.51E+00	-1.88E+00	#N/A
	330													1.77E+00		2.51E-02		3.03	3.03E-03	-2.52E+00	-1.60E+00	#N/A
	340													2.94E+00		4.73E-02		2.94	2.94E-03	-2.53E+00	-1.33E+00	A	4.73E-02
	350													4.84E+00		8.76E-02		2.86	2.86E-03	-2.54E+00	-1.06E+00	3.42E-67	1.00
	375													1.63E+01		3.84E-01		2.67	2.67E-03	-2.57E+00	-4.15E-01	n
	400													5.22E+01		1.56E+00		2.50	2.50E-03	-2.60E+00	1.93E-01	25.07
	425													1.60E+02		5.87E+00		2.35	2.35E-03	-2.63E+00	7.69E-01	Ea	1.00
	450													4.70E+02		2.07E+01		2.22	2.22E-03	-2.65E+00	1.32E+00	-1313	2.07E+01
	P1
	P2															Ea shift
	P3															-3.69E+01
>C(OO.)- | -CH2-	T													T-dependence	Target	Final		1000/T	1/T	log(1/T)	log(>C(OO.)- | -CH2-)	log(T)	Replicate
	200													1.32E-03		1.59E-03		5.00	5.00E-03	-2.30E+00	-2.80E+00	A	3.31E-04
	225													5.59E-03		6.59E-03		4.44	4.44E-03	-2.35E+00	-2.18E+00	3.81E+06	0.21
	250													2.35E-02		2.72E-02		4.00	4.00E-03	-2.40E+00	-1.57E+00	Ea
	260													4.13E-02		4.76E-02		3.85	3.85E-03	-2.41E+00	-1.32E+00	4.63E+03
	270													7.22E-02		8.28E-02		3.70	3.70E-03	-2.43E+00	-1.08E+00		1.73
	280													1.25E-01		1.43E-01		3.57	3.57E-03	-2.45E+00	-8.44E-01		2.48E-01
	290													2.16E-01		2.46E-01		3.45	3.45E-03	-2.46E+00	-6.10E-01	-2.51E+01
	298													3.33E-01	3.77E-01	3.77E-01		3.36	3.36E-03	-2.47E+00	-4.24E-01	1.20E+03
	310													6.29E-01		7.09E-01		3.23	3.23E-03	-2.49E+00	-1.49E-01	-6.65E+01
	320													1.06E+00		1.19E+00		3.13	3.13E-03	-2.51E+00	7.56E-02	#N/A
	330													1.77E+00		1.98E+00		3.03	3.03E-03	-2.52E+00	2.97E-01	#N/A
	340													2.94E+00		3.28E+00		2.94	2.94E-03	-2.53E+00	5.16E-01	A	3.28E+00
	350													4.84E+00		5.38E+00		2.86	2.86E-03	-2.54E+00	7.31E-01	3.42E-67	1.00
	375													1.63E+01		1.80E+01		2.67	2.67E-03	-2.57E+00	1.25E+00	n
	400													5.22E+01		5.72E+01		2.50	2.50E-03	-2.60E+00	1.76E+00	25.07
	425													1.60E+02		1.74E+02		2.35	2.35E-03	-2.63E+00	2.24E+00	Ea	1.00
	450													4.70E+02		5.10E+02		2.22	2.22E-03	-2.65E+00	2.71E+00	-2754	5.10E+02
	P1
	P2															Ea shift
	P3															-1.34E+03
>C(OO.)- | >CH-	T													T-dependence	Target	Final		1000/T	1/T	log(1/T)	log(>C(OO.)- | >CH-)	log(T)	Replicate
	200													1.32E-03		1.06E+00		5.00	5.00E-03	-2.30E+00	2.45E-02	A	2.20E-01
	225													5.59E-03		2.13E+00		4.44	4.44E-03	-2.35E+00	3.29E-01	3.81E+06	0.21
	250													2.35E-02		4.93E+00		4.00	4.00E-03	-2.40E+00	6.93E-01	Ea
	260													4.13E-02		7.07E+00		3.85	3.85E-03	-2.41E+00	8.49E-01	3.33E+03
	270													7.22E-02		1.02E+01		3.70	3.70E-03	-2.43E+00	1.01E+00		1.73
	280													1.25E-01		1.49E+01		3.57	3.57E-03	-2.45E+00	1.17E+00		2.58E+01
	290													2.16E-01		2.18E+01		3.45	3.45E-03	-2.46E+00	1.34E+00	-2.51E+01
	298													3.33E-01	2.96E+01	2.96E+01		3.36	3.36E-03	-2.47E+00	1.47E+00	1.76E+03
	310													6.29E-01		4.70E+01		3.23	3.23E-03	-2.49E+00	1.67E+00	-6.65E+01
	320													1.06E+00		6.92E+01		3.13	3.13E-03	-2.51E+00	1.84E+00	#N/A
	330													1.77E+00		1.02E+02		3.03	3.03E-03	-2.52E+00	2.01E+00	#N/A
	340													2.94E+00		1.50E+02		2.94	2.94E-03	-2.53E+00	2.18E+00	A	1.50E+02
	350													4.84E+00		2.21E+02		2.86	2.86E-03	-2.54E+00	2.34E+00	3.42E-67	1.00
	375													1.63E+01		5.76E+02		2.67	2.67E-03	-2.57E+00	2.76E+00	n
	400													5.22E+01		1.48E+03		2.50	2.50E-03	-2.60E+00	3.17E+00	25.07
	425													1.60E+02		3.72E+03		2.35	2.35E-03	-2.63E+00	3.57E+00	Ea	1.00
	450													4.70E+02		9.17E+03		2.22	2.22E-03	-2.65E+00	3.96E+00	-4054	9.17E+03
1,7 Hshift
	Average temperature dependence
																Ea shift
																0.00E+00
	T	-CH2OO. | -CH3	-CH2OO. | -CH2-											T-dependence	Target	Final		1000/T	1/T	log(1/T)	log()	log(T)	Replicate
	200	1.18E-02	1.26E-02											1.22E-02		1.22E-02		5.00	5.00E-03	-2.30E+00	-1.91E+00	A	3.52E-03
	225	3.85E-02	6.14E-02											4.86E-02		4.86E-02		4.44	4.44E-03	-2.35E+00	-1.31E+00	3.31E+06	0.29
	250	1.27E-01	2.65E-01											1.83E-01		1.83E-01		4.00	4.00E-03	-2.40E+00	-7.37E-01	Ea
	260	2.04E-01	4.60E-01											3.07E-01		3.07E-01		3.85	3.85E-03	-2.41E+00	-5.13E-01	4.13E+03
	270	3.28E-01	7.88E-01											5.08E-01		5.08E-01		3.70	3.70E-03	-2.43E+00	-2.94E-01		1.55
	280	5.23E-01	1.33E+00											8.33E-01		8.33E-01		3.57	3.57E-03	-2.45E+00	-7.93E-02		1.29E+00
	290	8.31E-01	2.20E+00											1.35E+00		1.35E+00		3.45	3.45E-03	-2.46E+00	1.31E-01	-1.99E+01
	298	1.20E+00	3.28E+00											1.98E+00	1.98E+00	1.98E+00		3.36	3.36E-03	-2.47E+00	2.97E-01	7.49E+02
	310	2.06E+00	5.84E+00											3.47E+00		3.47E+00		3.23	3.23E-03	-2.49E+00	5.40E-01	-5.14E+01
	320	3.22E+00	9.32E+00											5.48E+00		5.48E+00		3.13	3.13E-03	-2.51E+00	7.39E-01	#N/A
	330	5.01E+00	1.47E+01											8.58E+00		8.58E+00		3.03	3.03E-03	-2.52E+00	9.34E-01	#N/A
	340	7.73E+00	2.30E+01											1.33E+01		1.33E+01		2.94	2.94E-03	-2.53E+00	1.12E+00	A	1.33E+01
	350	1.19E+01	3.54E+01											2.05E+01		2.05E+01		2.86	2.86E-03	-2.54E+00	1.31E+00	3.95E-52	1.00
	375	3.38E+01	1.00E+02											5.82E+01		5.82E+01		2.67	2.67E-03	-2.57E+00	1.76E+00	n
	400	9.24E+01	2.68E+02											1.57E+02		1.57E+02		2.50	2.50E-03	-2.60E+00	2.20E+00	19.88
	425	2.44E+02	6.81E+02											4.08E+02		4.08E+02		2.35	2.35E-03	-2.63E+00	2.61E+00	Ea	1.00
	450	6.23E+02	1.65E+03											1.01E+03		1.01E+03		2.22	2.22E-03	-2.65E+00	3.01E+00	-1726	1.01E+03
		s
	P1	8.53893779536344E-60
	P2	22.364943401985														Ea shift
	P3	-2.62E+03														0.00E+00
-CH2OO. | -CH3	T	Vereecken 2019												T-dependence	Target	Final		1000/T	1/T	log(1/T)	log(-CH2OO. | -CH3)	log(T)	Replicate
	200	1.18E-02												1.18E-02		1.18E-02		5.00	5.00E-03	-2.30E+00	-1.93E+00	A	2.92E-03
	225	3.85E-02												3.85E-02		3.85E-02		4.44	4.44E-03	-2.35E+00	-1.41E+00	1.25E+06	0.25
	250	1.27E-01												1.27E-01		1.27E-01		4.00	4.00E-03	-2.40E+00	-8.96E-01	Ea
	260	2.04E-01												2.04E-01		2.04E-01		3.85	3.85E-03	-2.41E+00	-6.89E-01	3.98E+03
	270	3.28E-01												3.28E-01		3.28E-01		3.70	3.70E-03	-2.43E+00	-4.85E-01		1.63
	280	5.23E-01												5.23E-01		5.23E-01		3.57	3.57E-03	-2.45E+00	-2.82E-01		8.54E-01
	290	8.31E-01												8.31E-01		8.31E-01		3.45	3.45E-03	-2.46E+00	-8.06E-02	-2.24E+01
	298	1.20E+00												1.20E+00	1.20E+00	1.20E+00		3.36	3.36E-03	-2.47E+00	7.85E-02	1.14E+03
	310	2.06E+00												2.06E+00		2.06E+00		3.23	3.23E-03	-2.49E+00	3.14E-01	-5.91E+01
	320	3.22E+00												3.22E+00		3.22E+00		3.13	3.13E-03	-2.51E+00	5.08E-01	#N/A
	330	5.01E+00												5.01E+00		5.01E+00		3.03	3.03E-03	-2.52E+00	7.00E-01	#N/A
	340	7.73E+00												7.73E+00		7.73E+00		2.94	2.94E-03	-2.53E+00	8.88E-01	A	7.73E+00
	350	1.19E+01												1.19E+01		1.19E+01		2.86	2.86E-03	-2.54E+00	1.07E+00	8.54E-60	1.00
	375	3.38E+01												3.38E+01		3.38E+01		2.67	2.67E-03	-2.57E+00	1.53E+00	n
	400	9.24E+01												9.24E+01		9.24E+01		2.50	2.50E-03	-2.60E+00	1.97E+00	22.36
	425	2.44E+02												2.44E+02		2.44E+02		2.35	2.35E-03	-2.63E+00	2.39E+00	Ea	1.00
	450	6.23E+02												6.23E+02		6.23E+02		2.22	2.22E-03	-2.65E+00	2.79E+00	-2615	6.23E+02
		s
	P1	1.82504863527759E-44
	P2	17.3937663987873														Ea shift
	P3	-8.36E+02														0.00E+00
-CH2OO. | -CH2-	T	Vereecken 2019												T-dependence	Target	Final		1000/T	1/T	log(1/T)	log(-CH2OO. | -CH2-)	log(T)	Replicate
	200	1.26E-02												1.26E-02		1.26E-02		5.00	5.00E-03	-2.30E+00	-1.90E+00	A	4.24E-03
	225	6.14E-02												6.14E-02		6.14E-02		4.44	4.44E-03	-2.35E+00	-1.21E+00	8.75E+06	0.34
	250	2.65E-01												2.65E-01		2.65E-01		4.00	4.00E-03	-2.40E+00	-5.78E-01	Ea
	260	4.60E-01												4.60E-01		4.60E-01		3.85	3.85E-03	-2.41E+00	-3.37E-01	4.29E+03
	270	7.88E-01												7.88E-01		7.88E-01		3.70	3.70E-03	-2.43E+00	-1.04E-01		1.46
	280	1.33E+00												1.33E+00		1.33E+00		3.57	3.57E-03	-2.45E+00	1.23E-01		1.94E+00
	290	2.20E+00												2.20E+00		2.20E+00		3.45	3.45E-03	-2.46E+00	3.43E-01	-1.74E+01
	298	3.28E+00												3.28E+00	3.28E+00	3.28E+00		3.36	3.36E-03	-2.47E+00	5.15E-01	3.63E+02
	310	5.84E+00												5.84E+00		5.84E+00		3.23	3.23E-03	-2.49E+00	7.66E-01	-4.37E+01
	320	9.32E+00												9.32E+00		9.32E+00		3.13	3.13E-03	-2.51E+00	9.70E-01	#N/A
	330	1.47E+01												1.47E+01		1.47E+01		3.03	3.03E-03	-2.52E+00	1.17E+00	#N/A
	340	2.30E+01												2.30E+01		2.30E+01		2.94	2.94E-03	-2.53E+00	1.36E+00	A	2.30E+01
	350	3.54E+01												3.54E+01		3.54E+01		2.86	2.86E-03	-2.54E+00	1.55E+00	1.83E-44	1.00
	375	1.00E+02												1.00E+02		1.00E+02		2.67	2.67E-03	-2.57E+00	2.00E+00	n
	400	2.68E+02												2.68E+02		2.68E+02		2.50	2.50E-03	-2.60E+00	2.43E+00	17.39
	425	6.81E+02												6.81E+02		6.81E+02		2.35	2.35E-03	-2.63E+00	2.83E+00	Ea	1.00
	450	1.65E+03												1.65E+03		1.65E+03		2.22	2.22E-03	-2.65E+00	3.22E+00	-836	1.65E+03
	P1
	P2															Ea shift
	P3															-2.25E+03
-CH2OO. | >CH-	T													T-dependence	Target	Final		1000/T	1/T	log(1/T)	log(-CH2OO. | >CH-)	log(T)	Replicate
	200													1.22E-02		9.51E+02		5.00	5.00E-03	-2.30E+00	2.98E+00	A	2.74E+02
	225													4.86E-02		1.08E+03		4.44	4.44E-03	-2.35E+00	3.04E+00	3.31E+06	0.29
	250													1.83E-01		1.50E+03		4.00	4.00E-03	-2.40E+00	3.18E+00	Ea
	260													3.07E-01		1.78E+03		3.85	3.85E-03	-2.41E+00	3.25E+00	1.88E+03
	270													5.08E-01		2.14E+03		3.70	3.70E-03	-2.43E+00	3.33E+00		1.55
	280													8.33E-01		2.60E+03		3.57	3.57E-03	-2.45E+00	3.41E+00		4.02E+03
	290													1.35E+00		3.20E+03		3.45	3.45E-03	-2.46E+00	3.51E+00	-1.99E+01
	298													1.98E+00	3.80E+03	3.80E+03		3.36	3.36E-03	-2.47E+00	3.58E+00	1.73E+03
	310													3.47E+00		4.97E+03		3.23	3.23E-03	-2.49E+00	3.70E+00	-5.14E+01
	320													5.48E+00		6.26E+03		3.13	3.13E-03	-2.51E+00	3.80E+00	#N/A
	330													8.58E+00		7.91E+03		3.03	3.03E-03	-2.52E+00	3.90E+00	#N/A
	340													1.33E+01		1.01E+04		2.94	2.94E-03	-2.53E+00	4.00E+00	A	1.01E+04
	350													2.05E+01		1.28E+04		2.86	2.86E-03	-2.54E+00	4.11E+00	3.95E-52	1.00
	375													5.82E+01		2.36E+04		2.67	2.67E-03	-2.57E+00	4.37E+00	n
	400													1.57E+02		4.40E+04		2.50	2.50E-03	-2.60E+00	4.64E+00	19.88
	425													4.08E+02		8.17E+04		2.35	2.35E-03	-2.63E+00	4.91E+00	Ea	1.00
	450													1.01E+03		1.51E+05		2.22	2.22E-03	-2.65E+00	5.18E+00	-3978	1.51E+05
	P1
	P2															Ea shift
	P3															4.98E+02
>CHOO. | -CH3	T													T-dependence	Target	Final		1000/T	1/T	log(1/T)	log(>CHOO. | -CH3)	log(T)	Replicate
	200													1.22E-02		1.01E-03		5.00	5.00E-03	-2.30E+00	-3.00E+00	A	2.91E-04
	225													4.86E-02		5.31E-03		4.44	4.44E-03	-2.35E+00	-2.27E+00	3.31E+06	0.29
	250													1.83E-01		2.50E-02		4.00	4.00E-03	-2.40E+00	-1.60E+00	Ea
	260													3.07E-01		4.51E-02		3.85	3.85E-03	-2.41E+00	-1.35E+00	4.63E+03
	270													5.08E-01		8.03E-02		3.70	3.70E-03	-2.43E+00	-1.10E+00		1.55
	280													8.33E-01		1.41E-01		3.57	3.57E-03	-2.45E+00	-8.52E-01		2.17E-01
	290													1.35E+00		2.43E-01		3.45	3.45E-03	-2.46E+00	-6.15E-01	-1.99E+01
	298													1.98E+00	3.72E-01	3.72E-01		3.36	3.36E-03	-2.47E+00	-4.29E-01	5.33E+02
	310													3.47E+00		6.96E-01		3.23	3.23E-03	-2.49E+00	-1.58E-01	-5.14E+01
	320													5.48E+00		1.16E+00		3.13	3.13E-03	-2.51E+00	6.28E-02	#N/A
	330													8.58E+00		1.90E+00		3.03	3.03E-03	-2.52E+00	2.78E-01	#N/A
	340													1.33E+01		3.08E+00		2.94	2.94E-03	-2.53E+00	4.88E-01	A	3.08E+00
	350													2.05E+01		4.94E+00		2.86	2.86E-03	-2.54E+00	6.94E-01	3.95E-52	1.00
	375													5.82E+01		1.54E+01		2.67	2.67E-03	-2.57E+00	1.19E+00	n
	400													1.57E+02		4.53E+01		2.50	2.50E-03	-2.60E+00	1.66E+00	19.88
	425													4.08E+02		1.26E+02		2.35	2.35E-03	-2.63E+00	2.10E+00	Ea	1.00
	450													1.01E+03		3.35E+02		2.22	2.22E-03	-2.65E+00	2.53E+00	-1227	3.35E+02
	P1
	P2															Ea shift
	P3															-2.06E+02
>CHOO. | -CH2-	T													T-dependence	Target	Final		1000/T	1/T	log(1/T)	log(>CHOO. | -CH2-)	log(T)	Replicate
	200													1.22E-02		3.42E-02		5.00	5.00E-03	-2.30E+00	-1.47E+00	A	9.85E-03
	225													4.86E-02		1.22E-01		4.44	4.44E-03	-2.35E+00	-9.15E-01	3.31E+06	0.29
	250													1.83E-01		4.18E-01		4.00	4.00E-03	-2.40E+00	-3.79E-01	Ea
	260													3.07E-01		6.78E-01		3.85	3.85E-03	-2.41E+00	-1.69E-01	3.93E+03
	270													5.08E-01		1.09E+00		3.70	3.70E-03	-2.43E+00	3.74E-02		1.55
	280													8.33E-01		1.74E+00		3.57	3.57E-03	-2.45E+00	2.40E-01		2.69E+00
	290													1.35E+00		2.75E+00		3.45	3.45E-03	-2.46E+00	4.40E-01	-1.99E+01
	298													1.98E+00	3.96E+00	3.96E+00		3.36	3.36E-03	-2.47E+00	5.97E-01	8.39E+02
	310													3.47E+00		6.75E+00		3.23	3.23E-03	-2.49E+00	8.29E-01	-5.14E+01
	320													5.48E+00		1.04E+01		3.13	3.13E-03	-2.51E+00	1.02E+00	#N/A
	330													8.58E+00		1.60E+01		3.03	3.03E-03	-2.52E+00	1.20E+00	#N/A
	340													1.33E+01		2.44E+01		2.94	2.94E-03	-2.53E+00	1.39E+00	A	2.44E+01
	350													2.05E+01		3.70E+01		2.86	2.86E-03	-2.54E+00	1.57E+00	3.95E-52	1.00
	375													5.82E+01		1.01E+02		2.67	2.67E-03	-2.57E+00	2.00E+00	n
	400													1.57E+02		2.64E+02		2.50	2.50E-03	-2.60E+00	2.42E+00	19.88
	425													4.08E+02		6.62E+02		2.35	2.35E-03	-2.63E+00	2.82E+00	Ea	1.00
	450													1.01E+03		1.60E+03		2.22	2.22E-03	-2.65E+00	3.20E+00	-1932	1.60E+03
	P1
	P2															Ea shift
	P3															-1.54E+03
>CHOO. | >CH-	T													T-dependence	Target	Final		1000/T	1/T	log(1/T)	log(>CHOO. | >CH-)	log(T)	Replicate
	200													1.22E-02		2.75E+01		5.00	5.00E-03	-2.30E+00	1.44E+00	A	7.94E+00
	225													4.86E-02		4.65E+01		4.44	4.44E-03	-2.35E+00	1.67E+00	3.31E+06	0.29
	250													1.83E-01		8.84E+01		4.00	4.00E-03	-2.40E+00	1.95E+00	Ea
	260													3.07E-01		1.17E+02		3.85	3.85E-03	-2.41E+00	2.07E+00	2.59E+03
	270													5.08E-01		1.55E+02		3.70	3.70E-03	-2.43E+00	2.19E+00		1.55
	280													8.33E-01		2.07E+02		3.57	3.57E-03	-2.45E+00	2.32E+00		3.20E+02
	290													1.35E+00		2.78E+02		3.45	3.45E-03	-2.46E+00	2.44E+00	-1.99E+01
	298													1.98E+00	3.53E+02	3.53E+02		3.36	3.36E-03	-2.47E+00	2.55E+00	1.42E+03
	310													3.47E+00		5.06E+02		3.23	3.23E-03	-2.49E+00	2.70E+00	-5.14E+01
	320													5.48E+00		6.84E+02		3.13	3.13E-03	-2.51E+00	2.84E+00	#N/A
	330													8.58E+00		9.25E+02		3.03	3.03E-03	-2.52E+00	2.97E+00	#N/A
	340													1.33E+01		1.25E+03		2.94	2.94E-03	-2.53E+00	3.10E+00	A	1.25E+03
	350													2.05E+01		1.69E+03		2.86	2.86E-03	-2.54E+00	3.23E+00	3.95E-52	1.00
	375													5.82E+01		3.58E+03		2.67	2.67E-03	-2.57E+00	3.55E+00	n
	400													1.57E+02		7.48E+03		2.50	2.50E-03	-2.60E+00	3.87E+00	19.88
	425													4.08E+02		1.54E+04		2.35	2.35E-03	-2.63E+00	4.19E+00	Ea	1.00
	450													1.01E+03		3.14E+04		2.22	2.22E-03	-2.65E+00	4.50E+00	-3270	3.14E+04
	P1
	P2															Ea shift
	P3															1.92E+03
>C(OO.)- | -CH3	T													T-dependence	Target	Final		1000/T	1/T	log(1/T)	log(>C(OO.)- | -CH3)	log(T)	Replicate
	200													1.22E-02		8.28E-07		5.00	5.00E-03	-2.30E+00	-6.08E+00	A	2.39E-07
	225													4.86E-02		9.59E-06		4.44	4.44E-03	-2.35E+00	-5.02E+00	3.31E+06	0.29
	250													1.83E-01		8.49E-05		4.00	4.00E-03	-2.40E+00	-4.07E+00	Ea
	260													3.07E-01		1.91E-04		3.85	3.85E-03	-2.41E+00	-3.72E+00	6.05E+03
	270													5.08E-01		4.15E-04		3.70	3.70E-03	-2.43E+00	-3.38E+00		1.55
	280													8.33E-01		8.78E-04		3.57	3.57E-03	-2.45E+00	-3.06E+00		1.36E-03
	290													1.35E+00		1.81E-03		3.45	3.45E-03	-2.46E+00	-2.74E+00	-1.99E+01
	298													1.98E+00	3.16E-03	3.16E-03		3.36	3.36E-03	-2.47E+00	-2.50E+00	-8.43E+01
	310													3.47E+00		7.10E-03		3.23	3.23E-03	-2.49E+00	-2.15E+00	-5.14E+01
	320													5.48E+00		1.36E-02		3.13	3.13E-03	-2.51E+00	-1.87E+00	#N/A
	330													8.58E+00		2.55E-02		3.03	3.03E-03	-2.52E+00	-1.59E+00	#N/A
	340													1.33E+01		4.71E-02		2.94	2.94E-03	-2.53E+00	-1.33E+00	A	4.71E-02
	350													2.05E+01		8.51E-02		2.86	2.86E-03	-2.54E+00	-1.07E+00	3.95E-52	1.00
	375													5.82E+01		3.48E-01		2.67	2.67E-03	-2.57E+00	-4.58E-01	n
	400													1.57E+02		1.30E+00		2.50	2.50E-03	-2.60E+00	1.13E-01	19.88
	425													4.08E+02		4.45E+00		2.35	2.35E-03	-2.63E+00	6.49E-01	Ea	1.00
	450													1.01E+03		1.42E+01		2.22	2.22E-03	-2.65E+00	1.15E+00	194	1.42E+01
	P1
	P2															Ea shift
	P3															2.40E+02
>C(OO.)- | -CH2-	T													T-dependence	Target	Final		1000/T	1/T	log(1/T)	log(>C(OO.)- | -CH2-)	log(T)	Replicate
	200													1.22E-02		3.67E-03		5.00	5.00E-03	-2.30E+00	-2.43E+00	A	1.06E-03
	225													4.86E-02		1.67E-02		4.44	4.44E-03	-2.35E+00	-1.78E+00	3.31E+06	0.29
	250													1.83E-01		7.02E-02		4.00	4.00E-03	-2.40E+00	-1.15E+00	Ea
	260													3.07E-01		1.22E-01		3.85	3.85E-03	-2.41E+00	-9.14E-01	4.37E+03
	270													5.08E-01		2.09E-01		3.70	3.70E-03	-2.43E+00	-6.80E-01		1.55
	280													8.33E-01		3.54E-01		3.57	3.57E-03	-2.45E+00	-4.52E-01		5.46E-01
	290													1.35E+00		5.91E-01		3.45	3.45E-03	-2.46E+00	-2.28E-01	-1.99E+01
	298													1.98E+00	8.85E-01	8.85E-01		3.36	3.36E-03	-2.47E+00	-5.29E-02	6.45E+02
	310													3.47E+00		1.60E+00		3.23	3.23E-03	-2.49E+00	2.04E-01	-5.14E+01
	320													5.48E+00		2.59E+00		3.13	3.13E-03	-2.51E+00	4.13E-01	#N/A
	330													8.58E+00		4.15E+00		3.03	3.03E-03	-2.52E+00	6.18E-01	#N/A
	340													1.33E+01		6.58E+00		2.94	2.94E-03	-2.53E+00	8.18E-01	A	6.58E+00
	350													2.05E+01		1.03E+01		2.86	2.86E-03	-2.54E+00	1.01E+00	3.95E-52	1.00
	375													5.82E+01		3.07E+01		2.67	2.67E-03	-2.57E+00	1.49E+00	n
	400													1.57E+02		8.64E+01		2.50	2.50E-03	-2.60E+00	1.94E+00	19.88
	425													4.08E+02		2.32E+02		2.35	2.35E-03	-2.63E+00	2.37E+00	Ea	1.00
	450													1.01E+03		5.95E+02		2.22	2.22E-03	-2.65E+00	2.77E+00	-1486	5.95E+02
	P1
	P2															Ea shift
	P3															-1.05E+03
>C(OO.)- | >CH-	T													T-dependence	Target	Final		1000/T	1/T	log(1/T)	log(>C(OO.)- | >CH-)	log(T)	Replicate
	200													1.22E-02		2.31E+00		5.00	5.00E-03	-2.30E+00	3.63E-01	A	6.65E-01
	225													4.86E-02		5.13E+00		4.44	4.44E-03	-2.35E+00	7.10E-01	3.31E+06	0.29
	250													1.83E-01		1.22E+01		4.00	4.00E-03	-2.40E+00	1.08E+00	Ea
	260													3.07E-01		1.73E+01		3.85	3.85E-03	-2.41E+00	1.24E+00	3.08E+03
	270													5.08E-01		2.47E+01		3.70	3.70E-03	-2.43E+00	1.39E+00		1.55
	280													8.33E-01		3.52E+01		3.57	3.57E-03	-2.45E+00	1.55E+00		5.44E+01
	290													1.35E+00		5.03E+01		3.45	3.45E-03	-2.46E+00	1.70E+00	-1.99E+01
	298													1.98E+00	6.68E+01	6.68E+01		3.36	3.36E-03	-2.47E+00	1.82E+00	1.20E+03
	310													3.47E+00		1.02E+02		3.23	3.23E-03	-2.49E+00	2.01E+00	-5.14E+01
	320													5.48E+00		1.45E+02		3.13	3.13E-03	-2.51E+00	2.16E+00	#N/A
	330													8.58E+00		2.06E+02		3.03	3.03E-03	-2.52E+00	2.31E+00	#N/A
	340													1.33E+01		2.91E+02		2.94	2.94E-03	-2.53E+00	2.46E+00	A	2.91E+02
	350													2.05E+01		4.10E+02		2.86	2.86E-03	-2.54E+00	2.61E+00	3.95E-52	1.00
	375													5.82E+01		9.53E+02		2.67	2.67E-03	-2.57E+00	2.98E+00	n
	400													1.57E+02		2.16E+03		2.50	2.50E-03	-2.60E+00	3.34E+00	19.88
	425													4.08E+02		4.80E+03		2.35	2.35E-03	-2.63E+00	3.68E+00	Ea	1.00
	450													1.01E+03		1.04E+04		2.22	2.22E-03	-2.65E+00	4.02E+00	-2774	1.04E+04

## Sheet: Plot O2QOOH
RO2 migration of α-OOH hydrogen atoms
1,4 Hshift
	P0			2
	P1	1.83E+11	4.70E+11	-4.79E+00
	P2	1.33E+04	-2.40E-01	5.07												Ea shift
	P3		28	2.28E+01												0.00E+00
-CH2OO. | -CH2-	T	Miyoshi 2011	Sharma et al. 2010	Mohamed et al. 2018a										T-dependence	Target	Final		1000/T	1/T	log(1/T)	log(-CH2OO. | -CH2-)	log(T)	Replicate
	200	1.97E-18	1.74E-19	9.34E-16										6.84E-18		6.84E-18		5.00	5.00E-03	-2.30E+00	-1.72E+01	A	6.19E-18
	225	3.26E-15	4.25E-16	9.96E-13										1.11E-14		1.11E-14		4.44	4.44E-03	-2.35E+00	-1.40E+01	9.61E+11	0.90
	250	1.23E-12	2.17E-13	2.79E-10										4.20E-12		4.20E-12		4.00	4.00E-03	-2.40E+00	-1.14E+01	Ea
	260	9.55E-12	1.88E-12	1.99E-09										3.29E-11		3.29E-11		3.85	3.85E-03	-2.41E+00	-1.05E+01	1.34E+04
	270	6.38E-11	1.39E-11	1.23E-08										2.22E-10		2.22E-10		3.70	3.70E-03	-2.43E+00	-9.65E+00		1.04
	280	3.73E-10	8.87E-11	6.76E-08										1.31E-09		1.31E-09		3.57	3.57E-03	-2.45E+00	-8.88E+00		1.35E-09
	290	1.93E-09	4.99E-10	3.32E-07										6.83E-09		6.83E-09		3.45	3.45E-03	-2.46E+00	-8.17E+00	-1.61E+00
	298	6.63E-09	1.83E-09	1.10E-06										2.37E-08	2.37E-08	2.37E-08		3.36	3.36E-03	-2.47E+00	-7.62E+00	-5.63E+03
	310	3.75E-08	1.13E-08	5.98E-06										1.36E-07		1.36E-07		3.23	3.23E-03	-2.49E+00	-6.87E+00	7.29E+00
	320	1.44E-07	4.64E-08	2.23E-05										5.30E-07		5.30E-07		3.13	3.13E-03	-2.51E+00	-6.28E+00	#N/A
	330	5.09E-07	1.75E-07	7.74E-05										1.90E-06		1.90E-06		3.03	3.03E-03	-2.52E+00	-5.72E+00	#N/A
	340	1.67E-06	6.09E-07	2.50E-04										6.34E-06		6.34E-06		2.94	2.94E-03	-2.53E+00	-5.20E+00	A	6.34E-06
	350	5.12E-06	1.98E-06	7.60E-04										1.98E-05		1.98E-05		2.86	2.86E-03	-2.54E+00	-4.70E+00	1.96E+07	1.00
	375	6.50E-05	2.85E-05	9.60E-03										2.61E-04		2.61E-04		2.67	2.67E-03	-2.57E+00	-3.58E+00	n
	400	6.01E-04	2.94E-04	9.01E-02										2.51E-03		2.51E-03		2.50	2.50E-03	-2.60E+00	-2.60E+00	1.61
	425	4.27E-03	2.30E-03	6.62E-01										1.87E-02		1.87E-02		2.35	2.35E-03	-2.63E+00	-1.73E+00	Ea	1.00
	450	2.44E-02	1.43E-02	3.97E+00										1.12E-01		1.12E-01		2.22	2.22E-03	-2.65E+00	-9.53E-01	12969	1.12E-01
	P0				1	1
	P1	3.49E+11	1100000000000	4.10E+12	2.03E+00	-2.97E+00
	P2	1.22E+04	1.2	1.48E+04	3.21	4.56										Ea shift
	P3		25.7	1.97E+08	2.36E+01	2.09E+01										-1.56E+02
-CH2OO. | >CH-	T	Miyoshi 2011	Sharma et al. 2010	Otkjaer et al. 2018	Mohamed et al. 2018b	Mohamed et al. 2018a								T-dependence	Target	Final		1000/T	1/T	log(1/T)	log(-CH2OO. | >CH-)	log(T)	Replicate
	200	1.37E-15	1.31E-17		3.00E-18	2.30E-14								1.88E-16		4.09E-16		5.00	5.00E-03	-2.30E+00	-1.54E+01	A	3.56E-16
	225	1.18E-12	1.99E-14		3.21E-15	1.36E-11								1.79E-13		3.58E-13		4.44	4.44E-03	-2.35E+00	-1.24E+01	2.68E+11	0.87
	250	2.62E-10	7.08E-12		8.83E-13	2.36E-09								4.43E-11		8.28E-11		4.00	4.00E-03	-2.40E+00	-1.01E+01	Ea
	260	1.70E-09	5.43E-11		6.23E-12	1.42E-08								3.01E-10		5.48E-10		3.85	3.85E-03	-2.41E+00	-9.26E+00	1.24E+04
	270	9.63E-09	3.59E-10		3.82E-11	7.56E-08								1.78E-09		3.17E-09		3.70	3.70E-03	-2.43E+00	-8.50E+00		1.05
	280	4.81E-08	2.07E-09		2.06E-10	3.59E-07								9.27E-09		1.62E-08		3.57	3.57E-03	-2.45E+00	-7.79E+00		1.70E-08
	290	2.15E-07	1.06E-08	9.05E-07	9.98E-10	1.54E-06								4.33E-08		7.41E-08		3.45	3.45E-03	-2.46E+00	-7.13E+00	-2.24E+00
	298	6.63E-07	3.64E-08	1.89E-06	3.27E-09	4.61E-06								1.38E-07	2.33E-07	2.33E-07		3.36	3.36E-03	-2.47E+00	-6.63E+00	-5.09E+03
	310	3.22E-06	2.05E-07	5.63E-06	1.74E-08	2.16E-05								7.05E-07		1.17E-06		3.23	3.23E-03	-2.49E+00	-5.93E+00	4.89E+00
	320	1.10E-05	7.83E-07	1.37E-05	6.36E-08	7.22E-05								2.51E-06		4.08E-06		3.13	3.13E-03	-2.51E+00	-5.39E+00	#N/A
	330	3.47E-05	2.77E-06		2.16E-07	2.25E-04								8.26E-06		1.33E-05		3.03	3.03E-03	-2.52E+00	-4.88E+00	#N/A
	340	1.02E-04	9.08E-06		6.86E-07	6.58E-04								2.55E-05		4.03E-05		2.94	2.94E-03	-2.53E+00	-4.39E+00	A	4.03E-05
	350	2.85E-04	2.79E-05		2.04E-06	1.82E-03								7.37E-05		1.15E-04		2.86	2.86E-03	-2.54E+00	-3.94E+00	7.83E+04	1.00
	375	2.88E-03	3.56E-04		2.45E-05	1.85E-02								8.25E-04		1.25E-03		2.67	2.67E-03	-2.57E+00	-2.90E+00	n
	400	2.19E-02	3.32E-03		2.18E-04	1.43E-01								6.90E-03		1.02E-02		2.50	2.50E-03	-2.60E+00	-1.99E+00	2.24
	425	1.31E-01	2.39E-02		1.52E-03	8.86E-01								4.53E-02		6.54E-02		2.35	2.35E-03	-2.63E+00	-1.18E+00	Ea	1.00
	450	6.42E-01	1.39E-01		8.62E-03	4.54E+00								2.43E-01		3.44E-01		2.22	2.22E-03	-2.65E+00	-4.64E-01	11716	3.44E-01
	P0			2	2
	P1	8.96E+11	770000000000	-1.12E+00	-3.79E+00
	P2	1.51E+04	1.6	4.15	5.02											Ea shift
	P3		27.9	2.39E+01	2.23E+01											0.00E+00
>CHOO. | -CH2-	T	Miyoshi 2011	Sharma et al. 2010	Mohamed et al. 2018b	Mohamed et al. 2018a									T-dependence	Target	Final		1000/T	1/T	log(1/T)	log(>CHOO. | -CH2-)	log(T)	Replicate
	200	1.32E-21	1.90E-20	1.76E-17	6.85E-15									1.32E-18		1.32E-18		5.00	5.00E-03	-2.30E+00	-1.79E+01	A	1.11E-18
	225	5.86E-18	5.59E-17	2.29E-14	6.32E-12									2.62E-15		2.62E-15		4.44	4.44E-03	-2.35E+00	-1.46E+01	1.67E+12	0.84
	250	4.85E-15	3.40E-14	7.43E-12	1.57E-09									1.18E-12		1.18E-12		4.00	4.00E-03	-2.40E+00	-1.19E+01	Ea
	260	4.97E-14	3.14E-13	5.56E-11	1.08E-08									9.83E-12		9.83E-12		3.85	3.85E-03	-2.41E+00	-1.10E+01	1.39E+04
	270	4.28E-13	2.46E-12	3.61E-10	6.43E-08									7.03E-11		7.03E-11		3.70	3.70E-03	-2.43E+00	-1.02E+01		1.06
	280	3.17E-12	1.67E-11	2.06E-09	3.41E-07									4.39E-10		4.39E-10		3.57	3.57E-03	-2.45E+00	-9.36E+00		4.66E-10
	290	2.04E-11	9.97E-11	1.05E-08	1.62E-06									2.42E-09		2.42E-09		3.45	3.45E-03	-2.46E+00	-8.62E+00	-2.69E+00
	298	8.26E-11	3.82E-10	3.57E-08	5.24E-06									8.77E-09	8.77E-09	8.77E-09		3.36	3.36E-03	-2.47E+00	-8.06E+00	-5.69E+03
	310	5.89E-10	2.52E-09	2.01E-07	2.75E-05									5.35E-08		5.35E-08		3.23	3.23E-03	-2.49E+00	-7.27E+00	4.38E+00
	320	2.70E-09	1.09E-08	7.70E-07	9.99E-05									2.18E-07		2.18E-07		3.13	3.13E-03	-2.51E+00	-6.66E+00	#N/A
	330	1.13E-08	4.34E-08	2.73E-06	3.37E-04									8.20E-07		8.20E-07		3.03	3.03E-03	-2.52E+00	-6.09E+00	#N/A
	340	4.35E-08	1.59E-07	9.04E-06	1.07E-03									2.86E-06		2.86E-06		2.94	2.94E-03	-2.53E+00	-5.54E+00	A	2.86E-06
	350	1.55E-07	5.42E-07	2.80E-05	3.17E-03									9.29E-06		9.29E-06		2.86	2.86E-03	-2.54E+00	-5.03E+00	2.38E+04	1.00
	375	2.76E-06	8.78E-06	3.69E-04	3.79E-02									1.36E-04		1.36E-04		2.67	2.67E-03	-2.57E+00	-3.87E+00	n
	400	3.44E-05	1.01E-04	3.58E-03	3.41E-01									1.43E-03		1.43E-03		2.50	2.50E-03	-2.60E+00	-2.84E+00	2.69
	425	3.17E-04	8.78E-04	2.70E-02	2.41E+00									1.16E-02		1.16E-02		2.35	2.35E-03	-2.63E+00	-1.94E+00	Ea	1.00
	450	2.29E-03	6.03E-03	1.65E-01	1.39E+01									7.50E-02		7.50E-02		2.22	2.22E-03	-2.65E+00	-1.12E+00	13103	7.50E-02
	P0					1	1
	P1	2.16E+12	22000000000000	1.11E+12	3.91E+12	-2.60E-01	-2.60E-01
	P2	1.29E+04	1.7	14472	14399	3.92	3.92									Ea shift
	P3		26	1.82E+08	1.87E+08	2.03E+01	2.03E+01									-5.52E+01
>CHOO. | >CH-	T	Miyoshi 2011	Sharma et al. 2010	Praske et al. 2019	Praske et al. 2019	Mohamed et al. 2018b	Mohamed et al. 2018a							T-dependence	Target	Final		1000/T	1/T	log(1/T)	log(>CHOO. | >CH-)	log(T)	Replicate
	200	1.72E-16	5.50E-17			5.28E-14	5.28E-14							2.27E-15		2.99E-15		5.00	5.00E-03	-2.30E+00	-1.45E+01	A	2.57E-15
	225	2.28E-13	9.65E-14			2.44E-11	2.44E-11							1.90E-12		2.43E-12		4.44	4.44E-03	-2.35E+00	-1.16E+01	1.09E+12	0.86
	250	7.17E-11	3.87E-11			3.46E-09	3.46E-09							4.27E-10		5.33E-10		4.00	4.00E-03	-2.40E+00	-9.27E+00	Ea
	260	5.25E-10	3.10E-10			1.94E-08	1.94E-08							2.80E-09		3.46E-09		3.85	3.85E-03	-2.41E+00	-8.46E+00	1.23E+04
	270	3.32E-09	2.13E-09			9.66E-08	9.66E-08							1.60E-08		1.97E-08		3.70	3.70E-03	-2.43E+00	-7.71E+00		1.05
	280	1.84E-08	1.28E-08			4.30E-07	4.30E-07							8.12E-08		9.89E-08		3.57	3.57E-03	-2.45E+00	-7.00E+00		1.04E-07
	290	9.04E-08	6.80E-08	4.07E-07	2.24E-06	1.74E-06	1.74E-06							3.69E-07		4.47E-07		3.45	3.45E-03	-2.46E+00	-6.35E+00	-2.38E+00
	298	2.99E-07	2.39E-07	8.67E-07	4.67E-06	4.98E-06	4.98E-06							1.15E-06	1.39E-06	1.39E-06		3.36	3.36E-03	-2.47E+00	-5.86E+00	-5.02E+03
	310	1.61E-06	1.40E-06	2.64E-06	1.38E-05	2.19E-05	2.19E-05							5.73E-06		6.85E-06		3.23	3.23E-03	-2.49E+00	-5.16E+00	5.09E+00
	320	5.92E-06	5.53E-06	6.51E-06	3.34E-05	6.95E-05	6.95E-05							1.99E-05		2.37E-05		3.13	3.13E-03	-2.51E+00	-4.63E+00	#N/A
	330	2.02E-05	2.01E-05			2.06E-04	2.06E-04							6.45E-05		7.62E-05		3.03	3.03E-03	-2.52E+00	-4.12E+00	#N/A
	340	6.39E-05	6.79E-05			5.76E-04	5.76E-04							1.95E-04		2.29E-04		2.94	2.94E-03	-2.53E+00	-3.64E+00	A	2.29E-04
	350	1.90E-04	2.14E-04			1.52E-03	1.52E-03							5.54E-04		6.49E-04		2.86	2.86E-03	-2.54E+00	-3.19E+00	1.22E+05	1.00
	375	2.23E-03	2.91E-03			1.40E-02	1.40E-02							5.97E-03		6.92E-03		2.67	2.67E-03	-2.57E+00	-2.16E+00	n
	400	1.93E-02	2.88E-02			9.88E-02	9.88E-02							4.82E-02		5.54E-02		2.50	2.50E-03	-2.60E+00	-1.26E+00	2.38
	425	1.29E-01	2.19E-01			5.63E-01	5.63E-01							3.08E-01		3.50E-01		2.35	2.35E-03	-2.63E+00	-4.56E-01	Ea	1.00
	450	7.02E-01	1.33E+00			2.68E+00	2.68E+00							1.61E+00		1.82E+00		2.22	2.22E-03	-2.65E+00	2.60E-01	11559	1.82E+00
	P0		2
	P1	1.21E+12	-4.06E+00
	P2	1.42E+04	4.9													Ea shift
	P3		2.04E+01													0.00E+00
>C(OO.)- | -CH2-	T	Miyoshi 2011	Mohamed et al. 2018a											T-dependence	Target	Final		1000/T	1/T	log(1/T)	log(>C(OO.)- | -CH2-)	log(T)	Replicate
	200	1.86E-19	3.30E-13											2.48E-16		2.48E-16		5.00	5.00E-03	-2.30E+00	-1.56E+01	A	2.13E-16
	225	4.93E-16	1.76E-10											2.95E-13		2.95E-13		4.44	4.44E-03	-2.35E+00	-1.25E+01	2.81E+12	0.86
	250	2.71E-13	2.84E-08											8.76E-11		8.76E-11		4.00	4.00E-03	-2.40E+00	-1.01E+01	Ea
	260	2.40E-12	1.67E-07											6.33E-10		6.33E-10		3.85	3.85E-03	-2.41E+00	-9.20E+00	1.30E+04
	270	1.81E-11	8.66E-07											3.96E-09		3.96E-09		3.70	3.70E-03	-2.43E+00	-8.40E+00		1.06
	280	1.18E-10	4.02E-06											2.18E-08		2.18E-08		3.57	3.57E-03	-2.45E+00	-7.66E+00		2.30E-08
	290	6.80E-10	1.69E-05											1.07E-07		1.07E-07		3.45	3.45E-03	-2.46E+00	-6.97E+00	-2.45E+00
	298	2.53E-09	5.00E-05											3.56E-07	3.56E-07	3.56E-07		3.36	3.36E-03	-2.47E+00	-6.45E+00	-5.31E+03
	310	1.60E-08	2.30E-04											1.92E-06		1.92E-06		3.23	3.23E-03	-2.49E+00	-5.72E+00	5.31E+00
	320	6.68E-08	7.57E-04											7.11E-06		7.11E-06		3.13	3.13E-03	-2.51E+00	-5.15E+00	#N/A
	330	2.56E-07	2.33E-03											2.44E-05		2.44E-05		3.03	3.03E-03	-2.52E+00	-4.61E+00	#N/A
	340	9.07E-07	6.73E-03											7.81E-05		7.81E-05		2.94	2.94E-03	-2.53E+00	-4.11E+00	A	7.81E-05
	350	2.99E-06	1.84E-02											2.34E-04		2.34E-04		2.86	2.86E-03	-2.54E+00	-3.63E+00	2.04E+05	1.00
	375	4.46E-05	1.82E-01											2.85E-03		2.85E-03		2.67	2.67E-03	-2.57E+00	-2.55E+00	n
	400	4.74E-04	1.38E+00											2.56E-02		2.56E-02		2.50	2.50E-03	-2.60E+00	-1.59E+00	2.45
	425	3.82E-03	8.43E+00											1.79E-01		1.79E-01		2.35	2.35E-03	-2.63E+00	-7.46E-01	Ea	1.00
	450	2.44E-02	4.27E+01											1.02E+00		1.02E+00		2.22	2.22E-03	-2.65E+00	9.08E-03	12228	1.02E+00
				1
	P1	1300000000000	1.08E+12	-2.80E-01
	P2	12530	14830	3.73												Ea shift
	P3		1.72E+08	2.05E+01												1.63E+02
>C(OO.)- | >CH-	T	Miyoshi 2011	Praske et al. 2019	Mohamed et al. 2018a										T-dependence	Target	Final		1000/T	1/T	log(1/T)	log(>C(OO.)- | >CH-)	log(T)	Replicate
	200	8.04E-16		1.14E-14										3.03E-15		1.34E-15		5.00	5.00E-03	-2.30E+00	-1.49E+01	A	1.19E-15
	225	8.48E-13		5.47E-12										2.15E-12		1.04E-12		4.44	4.44E-03	-2.35E+00	-1.20E+01	2.69E+11	0.89
	250	2.22E-10		7.95E-10										4.20E-10		2.19E-10		4.00	4.00E-03	-2.40E+00	-9.66E+00	Ea
	260	1.53E-09		4.50E-09										2.62E-09		1.40E-09		3.85	3.85E-03	-2.41E+00	-8.85E+00	1.21E+04
	270	9.11E-09		2.25E-08										1.43E-08		7.83E-09		3.70	3.70E-03	-2.43E+00	-8.11E+00		1.04
	280	4.78E-08		1.01E-07										6.94E-08		3.88E-08		3.57	3.57E-03	-2.45E+00	-7.41E+00		4.04E-08
	290	2.24E-07	7.82E-08	4.10E-07										3.03E-07		1.72E-07		3.45	3.45E-03	-2.46E+00	-6.76E+00	-1.86E+00
	298	7.13E-07	1.77E-07	1.18E-06										9.17E-07	5.30E-07	5.30E-07		3.36	3.36E-03	-2.47E+00	-6.28E+00	-5.03E+03
	310	3.63E-06	5.89E-07	5.22E-06										4.35E-06		2.57E-06		3.23	3.23E-03	-2.49E+00	-5.59E+00	6.00E+00
	320	1.28E-05	1.55E-06	1.66E-05										1.46E-05		8.77E-06		3.13	3.13E-03	-2.51E+00	-5.06E+00	#N/A
	330	4.21E-05		4.95E-05										4.56E-05		2.78E-05		3.03	3.03E-03	-2.52E+00	-4.56E+00	#N/A
	340	1.29E-04		1.39E-04										1.34E-04		8.27E-05		2.94	2.94E-03	-2.53E+00	-4.08E+00	A	8.27E-05
	350	3.68E-04		3.68E-04										3.68E-04		2.31E-04		2.86	2.86E-03	-2.54E+00	-3.64E+00	9.91E+05	1.00
	375	4.01E-03		3.40E-03										3.69E-03		2.39E-03		2.67	2.67E-03	-2.57E+00	-2.62E+00	n
	400	3.23E-02		2.41E-02										2.79E-02		1.86E-02		2.50	2.50E-03	-2.60E+00	-1.73E+00	1.86
	425	2.04E-01		1.38E-01										1.68E-01		1.14E-01		2.35	2.35E-03	-2.63E+00	-9.42E-01	Ea	1.00
	450	1.05E+00		6.58E-01										8.31E-01		5.78E-01		2.22	2.22E-03	-2.65E+00	-2.38E-01	11587	5.78E-01
1,5 Hshift
	Average temperature dependence															Ea shift
																0.00E+00
	T	1,6-H-shift												T-dependence	Target	Final		1000/T	1/T	log(1/T)	log()	log(T)	Replicate
	200	4.60E-05												4.60E-05		4.60E-05		5.00	5.00E-03	-2.30E+00	-4.34E+00	A	1.32E-05
	225	3.23E-04												3.23E-04		3.23E-04		4.44	4.44E-03	-2.35E+00	-3.49E+00	2.09E+06	0.29
	250	1.92E-03												1.92E-03		1.92E-03		4.00	4.00E-03	-2.40E+00	-2.72E+00	Ea
	260	3.76E-03												3.76E-03		3.76E-03		3.85	3.85E-03	-2.41E+00	-2.42E+00	5.16E+03
	270	7.21E-03												7.21E-03		7.21E-03		3.70	3.70E-03	-2.43E+00	-2.14E+00		1.55
	280	1.35E-02												1.35E-02		1.35E-02		3.57	3.57E-03	-2.45E+00	-1.87E+00		2.09E-02
	290	2.50E-02												2.50E-02		2.50E-02		3.45	3.45E-03	-2.46E+00	-1.60E+00	-1.99E+01
	298	4.02E-02												4.02E-02	4.02E-02	4.02E-02		3.36	3.36E-03	-2.47E+00	-1.40E+00	3.08E+02
	310	8.04E-02												8.04E-02		8.04E-02		3.23	3.23E-03	-2.49E+00	-1.09E+00	-5.17E+01
	320	1.41E-01												1.41E-01		1.41E-01		3.13	3.13E-03	-2.51E+00	-8.51E-01	#N/A
	330	2.43E-01												2.43E-01		2.43E-01		3.03	3.03E-03	-2.52E+00	-6.14E-01	#N/A
	340	4.13E-01												4.13E-01		4.13E-01		2.94	2.94E-03	-2.53E+00	-3.84E-01	A	4.13E-01
	350	6.94E-01												6.94E-01		6.94E-01		2.86	2.86E-03	-2.54E+00	-1.59E-01	2.01E-52	1.00
	375	2.39E+00												2.39E+00		2.39E+00		2.67	2.67E-03	-2.57E+00	3.79E-01	n
	400	7.69E+00												7.69E+00		7.69E+00		2.50	2.50E-03	-2.60E+00	8.86E-01	19.91
	425	2.32E+01												2.32E+01		2.32E+01		2.35	2.35E-03	-2.63E+00	1.36E+00	Ea	1.00
	450	6.59E+01												6.59E+01		6.59E+01		2.22	2.22E-03	-2.65E+00	1.82E+00	-710	6.59E+01
	P0			2
	P1	9.35E+10	13000000000	2.10E-01
	P2	9.61E+03	1.90E+00	3.3												Ea shift
	P3		1.88E+01	1.50E+01										average		1.36E+03
-CH2OO. | -CH2-	T	Miyoshi 2011	Sharma et al. 2010	Mohamed et al. 2018a										T-dependence	Target	Final		1000/T	1/T	log(1/T)	log(-CH2OO. | -CH2-)	log(T)	Replicate
	200	1.27E-10	1.74E-12	3.92E-09										4.60E-05		5.01E-08		5.00	5.00E-03	-2.30E+00	-7.30E+00	A	1.44E-08
	225	2.64E-08	4.17E-10	3.83E-07										3.23E-04		7.52E-07		4.44	4.44E-03	-2.35E+00	-6.12E+00	2.09E+06	0.29
	250	1.89E-06	3.42E-08	1.55E-05										1.92E-03		8.20E-06		4.00	4.00E-03	-2.40E+00	-5.09E+00	Ea
	260	8.29E-06	1.58E-07	5.65E-05										3.76E-03		1.98E-05		3.85	3.85E-03	-2.41E+00	-4.70E+00	6.52E+03
	270	3.26E-05	6.53E-07	1.88E-04										7.21E-03		4.61E-05		3.70	3.70E-03	-2.43E+00	-4.34E+00		1.55
	280	1.16E-04	2.44E-06	5.74E-04										1.35E-02		1.04E-04		3.57	3.57E-03	-2.45E+00	-3.98E+00		1.60E-04
	290	3.79E-04	8.38E-06	1.63E-03										2.50E-02		2.26E-04		3.45	3.45E-03	-2.46E+00	-3.65E+00	-1.99E+01
	298	9.24E-04	2.12E-05	3.59E-03										4.02E-02	4.13E-04	4.13E-04		3.36	3.36E-03	-2.47E+00	-3.38E+00	-2.84E+02
	310	3.22E-03	7.81E-05	1.09E-02										8.04E-02		9.86E-04		3.23	3.23E-03	-2.49E+00	-3.01E+00	-5.17E+01
	320	8.48E-03	2.15E-04	2.59E-02										1.41E-01		1.98E-03		3.13	3.13E-03	-2.51E+00	-2.70E+00	#N/A
	330	2.11E-02	5.59E-04	5.87E-02										2.43E-01		3.89E-03		3.03	3.03E-03	-2.52E+00	-2.41E+00	#N/A
	340	4.96E-02	1.37E-03	1.27E-01										4.13E-01		7.48E-03		2.94	2.94E-03	-2.53E+00	-2.13E+00	A	7.48E-03
	350	1.11E-01	3.22E-03	2.63E-01										6.94E-01		1.41E-02		2.86	2.86E-03	-2.54E+00	-1.85E+00	2.01E-52	1.00
	375	6.94E-01	2.22E-02	1.39E+00										2.39E+00		6.30E-02		2.67	2.67E-03	-2.57E+00	-1.20E+00	n
	400	3.44E+00	1.22E-01	6.06E+00										7.69E+00		2.54E-01		2.50	2.50E-03	-2.60E+00	-5.96E-01	19.91
	425	1.41E+01	5.49E-01	2.25E+01										2.32E+01		9.34E-01		2.35	2.35E-03	-2.63E+00	-2.95E-02	Ea	1.00
	450	4.97E+01	2.11E+00	7.28E+01										6.59E+01		3.18E+00		2.22	2.22E-03	-2.65E+00	5.02E-01	654	3.18E+00
	P0				1	1
	P1	1.07E+11	29000000000	1.29E+11	1.13E+00	1.13E+00
	P2	8.52E+03	2.9	1.01E+04	3.15	3.15										Ea shift
	P3		17	1.02E+08	1.42E+01	1.42E+01										5.67E+02
-CH2OO. | >CH-	T	Miyoshi 2011	Sharma et al. 2010	Otkjaer et al. 2018	Mohamed et al. 2018b	Mohamed et al. 2018a								T-dependence	Target	Final		1000/T	1/T	log(1/T)	log(-CH2OO. | >CH-)	log(T)	Replicate
	200	3.38E-08	7.20E-11		1.66E-08	1.66E-08								4.60E-05		2.69E-06		5.00	5.00E-03	-2.30E+00	-5.57E+00	A	7.75E-07
	225	3.84E-06	1.17E-08		1.28E-06	1.28E-06								3.23E-04		2.60E-05		4.44	4.44E-03	-2.35E+00	-4.59E+00	2.09E+06	0.29
	250	1.69E-04	7.14E-07		4.26E-05	4.26E-05								1.92E-03		1.99E-04		4.00	4.00E-03	-2.40E+00	-3.70E+00	Ea
	260	6.28E-04	2.98E-06		1.45E-04	1.45E-04								3.76E-03		4.25E-04		3.85	3.85E-03	-2.41E+00	-3.37E+00	5.72E+03
	270	2.11E-03	1.13E-05		4.51E-04	4.51E-04								7.21E-03		8.82E-04		3.70	3.70E-03	-2.43E+00	-3.05E+00		1.55
	280	6.52E-03	3.88E-05		1.30E-03	1.30E-03								1.35E-02		1.79E-03		3.57	3.57E-03	-2.45E+00	-2.75E+00		2.76E-03
	290	1.86E-02	1.23E-04	6.33E-03	3.51E-03	3.51E-03								2.50E-02		3.53E-03		3.45	3.45E-03	-2.46E+00	-2.45E+00	-1.99E+01
	298	4.10E-02	2.94E-04	1.16E-02	7.41E-03	7.41E-03								4.02E-02	5.99E-03	5.99E-03		3.36	3.36E-03	-2.47E+00	-2.22E+00	6.19E+01
	310	1.24E-01	1.00E-03	2.81E-02	2.12E-02	2.12E-02								8.04E-02		1.29E-02		3.23	3.23E-03	-2.49E+00	-1.89E+00	-5.17E+01
	320	2.93E-01	2.61E-03	5.69E-02	4.82E-02	4.82E-02								1.41E-01		2.39E-02		3.13	3.13E-03	-2.51E+00	-1.62E+00	#N/A
	330	6.56E-01	6.41E-03		1.04E-01	1.04E-01								2.43E-01		4.36E-02		3.03	3.03E-03	-2.52E+00	-1.36E+00	#N/A
	340	1.40E+00	1.50E-02		2.17E-01	2.17E-01								4.13E-01		7.79E-02		2.94	2.94E-03	-2.53E+00	-1.11E+00	A	7.79E-02
	350	2.87E+00	3.34E-02		4.33E-01	4.33E-01								6.94E-01		1.37E-01		2.86	2.86E-03	-2.54E+00	-8.63E-01	2.01E-52	1.00
	375	1.45E+01	2.08E-01		2.10E+00	2.10E+00								2.39E+00		5.27E-01		2.67	2.67E-03	-2.57E+00	-2.78E-01	n
	400	6.01E+01	1.05E+00		8.47E+00	8.47E+00								7.69E+00		1.86E+00		2.50	2.50E-03	-2.60E+00	2.70E-01	19.91
	425	2.10E+02	4.39E+00		2.93E+01	2.93E+01								2.32E+01		6.09E+00		2.35	2.35E-03	-2.63E+00	7.85E-01	Ea	1.00
	450	6.41E+02	1.58E+01		8.94E+01	8.94E+01								6.59E+01		1.87E+01		2.22	2.22E-03	-2.65E+00	1.27E+00	-143	1.87E+01
	P0			2	2
	P1	1.67E+11	248500000000	2.32E+00	1.69E+00
	P2	9.33E+03	3.00E+00	2.76	2.98											Ea shift
	P3		1.88E+01	1.60E+01	1.56E+01											1.27E+03
>CHOO. | -CH2-	T	Miyoshi 2011	Sharma et al. 2010	Mohamed et al. 2018b	Mohamed et al. 2018a									T-dependence	Target	Final		1000/T	1/T	log(1/T)	log(>CHOO. | -CH2-)	log(T)	Replicate
	200	9.18E-10	5.66E-12	1.49E-10	6.98E-10									4.60E-05		8.10E-08		5.00	5.00E-03	-2.30E+00	-7.09E+00	A	2.33E-08
	225	1.64E-07	1.55E-09	1.81E-08	7.77E-08									3.23E-04		1.15E-06		4.44	4.44E-03	-2.35E+00	-5.94E+00	2.09E+06	0.29
	250	1.03E-05	1.42E-07	8.68E-07	3.49E-06									1.92E-03		1.20E-05		4.00	4.00E-03	-2.40E+00	-4.92E+00	Ea
	260	4.35E-05	6.86E-07	3.34E-06	1.31E-05									3.76E-03		2.87E-05		3.85	3.85E-03	-2.41E+00	-4.54E+00	6.43E+03
	270	1.64E-04	2.96E-06	1.17E-05	4.49E-05									7.21E-03		6.58E-05		3.70	3.70E-03	-2.43E+00	-4.18E+00		1.55
	280	5.64E-04	1.15E-05	3.74E-05	1.41E-04									1.35E-02		1.46E-04		3.57	3.57E-03	-2.45E+00	-3.84E+00		2.26E-04
	290	1.78E-03	4.10E-05	1.11E-04	4.13E-04									2.50E-02		3.15E-04		3.45	3.45E-03	-2.46E+00	-3.50E+00	-1.99E+01
	298	4.22E-03	1.07E-04	2.52E-04	9.25E-04									4.02E-02	5.70E-04	5.70E-04		3.36	3.36E-03	-2.47E+00	-3.24E+00	-2.42E+02
	310	1.42E-02	4.11E-04	8.01E-04	2.89E-03									8.04E-02		1.34E-03		3.23	3.23E-03	-2.49E+00	-2.87E+00	-5.17E+01
	320	3.63E-02	1.17E-03	1.97E-03	7.00E-03									1.41E-01		2.68E-03		3.13	3.13E-03	-2.51E+00	-2.57E+00	#N/A
	330	8.79E-02	3.16E-03	4.60E-03	1.61E-02									2.43E-01		5.21E-03		3.03	3.03E-03	-2.52E+00	-2.28E+00	#N/A
	340	2.02E-01	8.02E-03	1.02E-02	3.55E-02									4.13E-01		9.92E-03		2.94	2.94E-03	-2.53E+00	-2.00E+00	A	9.92E-03
	350	4.42E-01	1.94E-02	2.18E-02	7.49E-02									6.94E-01		1.85E-02		2.86	2.86E-03	-2.54E+00	-1.73E+00	2.01E-52	1.00
	375	2.61E+00	1.45E-01	1.22E-01	4.10E-01									2.39E+00		8.13E-02		2.67	2.67E-03	-2.57E+00	-1.09E+00	n
	400	1.24E+01	8.49E-01	5.59E-01	1.84E+00									7.69E+00		3.23E-01		2.50	2.50E-03	-2.60E+00	-4.91E-01	19.91
	425	4.88E+01	4.09E+00	2.16E+00	7.00E+00									2.32E+01		1.17E+00		2.35	2.35E-03	-2.63E+00	6.88E-02	Ea	1.00
	450	1.65E+02	1.67E+01	7.25E+00	2.31E+01									6.59E+01		3.93E+00		2.22	2.22E-03	-2.65E+00	5.95E-01	558	3.93E+00
	P0					1
	P1	1.64E+11	350000000000	1.83E+11	4.34E+11	2.67E+00
	P2	8.29E+03	3.10E+00	9818.4	9701.6	2.8										Ea shift
	P3		1.75E+01	1.04E+08	9.57E+07	1.41E+01										1.83E+02					296	1.926E-02
>CHOO. | >CH-	T	Miyoshi 2011	Sharma et al. 2010	Praske et al. 2019	Praske et al. 2019	Mohamed et al. 2018a								T-dependence	Target	Final		1000/T	1/T	log(1/T)	log(>CHOO. | >CH-)	log(T)	Replicate
	200	1.63E-07	1.79E-10			1.56E-08								4.60E-05		1.84E-05		5.00	5.00E-03	-2.30E+00	-4.73E+00	A	5.30E-06
	225	1.63E-05	3.44E-08			1.12E-06								3.23E-04		1.44E-04		4.44	4.44E-03	-2.35E+00	-3.84E+00	2.09E+06	0.29
	250	6.51E-04	2.39E-06			3.52E-05								1.92E-03		9.25E-04		4.00	4.00E-03	-2.40E+00	-3.03E+00	Ea
	260	2.33E-03	1.05E-05			1.17E-04								3.76E-03		1.86E-03		3.85	3.85E-03	-2.41E+00	-2.73E+00	5.34E+03
	270	7.59E-03	4.12E-05			3.58E-04								7.21E-03		3.66E-03		3.70	3.70E-03	-2.43E+00	-2.44E+00		1.55
	280	2.27E-02	1.48E-04			1.01E-03								1.35E-02		7.05E-03		3.57	3.57E-03	-2.45E+00	-2.15E+00		1.09E-02
	290	6.31E-02	4.88E-04	2.58E-02	6.50E-02	2.68E-03								2.50E-02		1.33E-02		3.45	3.45E-03	-2.46E+00	-1.88E+00	-1.99E+01
	298	1.36E-01	1.20E-03	4.58E-02	1.17E-01	5.57E-03								4.02E-02	2.18E-02	2.18E-02		3.36	3.36E-03	-2.47E+00	-1.66E+00	2.29E+02
	310	3.99E-01	4.25E-03	1.06E-01	2.76E-01	1.56E-02								8.04E-02		4.46E-02		3.23	3.23E-03	-2.49E+00	-1.35E+00	-5.17E+01
	320	9.20E-01	1.14E-02	2.07E-01	5.48E-01	3.49E-02								1.41E-01		7.96E-02		3.13	3.13E-03	-2.51E+00	-1.10E+00	#N/A
	330	2.02E+00	2.89E-02			7.46E-02								2.43E-01		1.40E-01		3.03	3.03E-03	-2.52E+00	-8.55E-01	#N/A
	340	4.22E+00	6.95E-02			1.53E-01								4.13E-01		2.42E-01		2.94	2.94E-03	-2.53E+00	-6.17E-01	A	2.42E-01
	350	8.48E+00	1.59E-01			3.00E-01								6.94E-01		4.11E-01		2.86	2.86E-03	-2.54E+00	-3.86E-01	2.01E-52	1.00
	375	4.11E+01	1.06E+00			1.41E+00								2.39E+00		1.47E+00		2.67	2.67E-03	-2.57E+00	1.67E-01	n
	400	1.64E+02	5.60E+00			5.51E+00								7.69E+00		4.87E+00		2.50	2.50E-03	-2.60E+00	6.87E-01	19.91
	425	5.54E+02	2.47E+01			1.85E+01								2.32E+01		1.51E+01		2.35	2.35E-03	-2.63E+00	1.18E+00	Ea	1.00
	450	1.64E+03	9.31E+01			5.50E+01								6.59E+01		4.39E+01		2.22	2.22E-03	-2.65E+00	1.64E+00	-527	4.39E+01
	P0		2
	P1	1.32E+11	-1.13E+00
	P2	9.46E+03	3.94													Ea shift
	P3		1.41E+01													2.25E+02
>C(OO.)- | -CH2-	T	Miyoshi 2011	Mohamed et al. 2018a											T-dependence	Target	Final		1000/T	1/T	log(1/T)	log(>C(OO.)- | -CH2-)	log(T)	Replicate
	200	3.79E-10	2.93E-07											4.60E-05		1.49E-05		5.00	5.00E-03	-2.30E+00	-4.83E+00	A	4.28E-06
	225	7.26E-08	2.40E-05											3.23E-04		1.19E-04		4.44	4.44E-03	-2.35E+00	-3.93E+00	2.09E+06	0.29
	250	4.86E-06	8.53E-04											1.92E-03		7.80E-04		4.00	4.00E-03	-2.40E+00	-3.11E+00	Ea
	260	2.08E-05	2.97E-03											3.76E-03		1.58E-03		3.85	3.85E-03	-2.41E+00	-2.80E+00	5.38E+03
	270	8.02E-05	9.46E-03											7.21E-03		3.13E-03		3.70	3.70E-03	-2.43E+00	-2.50E+00		1.55
	280	2.80E-04	2.79E-02											1.35E-02		6.05E-03		3.57	3.57E-03	-2.45E+00	-2.22E+00		9.37E-03
	290	8.99E-04	7.68E-02											2.50E-02		1.15E-02		3.45	3.45E-03	-2.46E+00	-1.94E+00	-1.99E+01
	298	2.16E-03	1.65E-01											4.02E-02	1.89E-02	1.89E-02		3.36	3.36E-03	-2.47E+00	-1.72E+00	2.10E+02
	310	7.37E-03	4.84E-01											8.04E-02		3.89E-02		3.23	3.23E-03	-2.49E+00	-1.41E+00	-5.17E+01
	320	1.91E-02	1.12E+00											1.41E-01		6.96E-02		3.13	3.13E-03	-2.51E+00	-1.16E+00	#N/A
	330	4.69E-02	2.48E+00											2.43E-01		1.23E-01		3.03	3.03E-03	-2.52E+00	-9.11E-01	#N/A
	340	1.09E-01	5.25E+00											4.13E-01		2.13E-01		2.94	2.94E-03	-2.53E+00	-6.72E-01	A	2.13E-01
	350	2.41E-01	1.07E+01											6.94E-01		3.64E-01		2.86	2.86E-03	-2.54E+00	-4.39E-01	2.01E-52	1.00
	375	1.46E+00	5.42E+01											2.39E+00		1.31E+00		2.67	2.67E-03	-2.57E+00	1.18E-01	n
	400	7.07E+00	2.28E+02											7.69E+00		4.38E+00		2.50	2.50E-03	-2.60E+00	6.41E-01	19.91
	425	2.84E+01	8.22E+02											2.32E+01		1.36E+01		2.35	2.35E-03	-2.63E+00	1.13E+00	Ea	1.00
	450	9.79E+01	2.60E+03											6.59E+01		3.99E+01		2.22	2.22E-03	-2.65E+00	1.60E+00	-484	3.99E+01
							1
	P1	1.78E+11	1.68E+12		2.26E+11	2.87E+11	3.82E+00
	P2	8.51E+03	10272		9.65E+03	9.80E+03	2.44									Ea shift
	P3		8.94E+07		9.57E+07	1.04E+08	1.49E+01									1.13E+02
>C(OO.)- | >CH-	T	Miyoshi 2011	Praske et al. 2019	Praske et al. 2019 (exp)	Otkjaer et al. 2018	Otkjaer et al. 2018	Mohamed et al. 2018a							T-dependence	Target	Final		1000/T	1/T	log(1/T)	log(>C(OO.)- | >CH-)	log(T)	Replicate
	200	5.90E-08					9.78E-10							4.60E-05		2.62E-05		5.00	5.00E-03	-2.30E+00	-4.58E+00	A	7.53E-06
	225	6.67E-06					8.40E-08							3.23E-04		1.96E-04		4.44	4.44E-03	-2.35E+00	-3.71E+00	2.09E+06	0.29
	250	2.93E-04					3.04E-06							1.92E-03		1.23E-03		4.00	4.00E-03	-2.40E+00	-2.91E+00	Ea
	260	1.09E-03					1.06E-05							3.76E-03		2.44E-03		3.85	3.85E-03	-2.41E+00	-2.61E+00	5.27E+03
	270	3.65E-03					3.39E-05							7.21E-03		4.75E-03		3.70	3.70E-03	-2.43E+00	-2.32E+00		1.55
	280	1.12E-02					9.98E-05							1.35E-02		9.06E-03		3.57	3.57E-03	-2.45E+00	-2.04E+00		1.40E-02
	290	3.21E-02	2.73E-02		4.04E-02	4.30E-02	2.74E-04							2.50E-02		1.69E-02		3.45	3.45E-03	-2.46E+00	-1.77E+00	-1.99E+01
	298	7.05E-02	5.29E-02	3.60E-02	7.26E-02	7.63E-02	5.86E-04							4.02E-02	2.75E-02	2.75E-02		3.36	3.36E-03	-2.47E+00	-1.56E+00	2.59E+02
	310	2.13E-01	1.38E-01		1.70E-01	1.76E-01	1.71E-03							8.04E-02		5.59E-02		3.23	3.23E-03	-2.49E+00	-1.25E+00	-5.17E+01
	320	5.02E-01	2.95E-01	1.30E-01	3.36E-01	3.44E-01	3.93E-03							1.41E-01		9.91E-02		3.13	3.13E-03	-2.51E+00	-1.00E+00	#N/A
	330	1.12E+00					8.62E-03							2.43E-01		1.73E-01		3.03	3.03E-03	-2.52E+00	-7.62E-01	#N/A
	340	2.40E+00					1.81E-02							4.13E-01		2.97E-01		2.94	2.94E-03	-2.53E+00	-5.27E-01	A	2.97E-01
	350	4.91E+00					3.65E-02							6.94E-01		5.03E-01		2.86	2.86E-03	-2.54E+00	-2.99E-01	2.01E-52	1.00
	375	2.48E+01					1.80E-01							2.39E+00		1.77E+00		2.67	2.67E-03	-2.57E+00	2.49E-01	n
	400	1.03E+02					7.35E-01							7.69E+00		5.80E+00		2.50	2.50E-03	-2.60E+00	7.63E-01	19.91
	425	3.58E+02					2.57E+00							2.32E+01		1.78E+01		2.35	2.35E-03	-2.63E+00	1.25E+00	Ea	1.00
	450	1.09E+03					7.87E+00							6.59E+01		5.13E+01		2.22	2.22E-03	-2.65E+00	1.71E+00	-597	5.13E+01
1,6 Hshift
	Average temperature dependence															Ea shift
																0.00E+00
	T	1,6 pt Vereecken	1,6 ss Vereecken											T-dependence	Target	Final		1000/T	1/T	log(1/T)	log()	log(T)	Replicate
	200	1.26E-03	1.68E-06											4.60E-05		4.60E-05		5.00	5.00E-03	-2.30E+00	-4.34E+00	A	1.32E-05
	225	4.55E-03	2.30E-05											3.23E-04		3.23E-04		4.44	4.44E-03	-2.35E+00	-3.49E+00	2.09E+06	0.29
	250	1.66E-02	2.22E-04											1.92E-03		1.92E-03		4.00	4.00E-03	-2.40E+00	-2.72E+00	Ea
	260	2.78E-02	5.10E-04											3.76E-03		3.76E-03		3.85	3.85E-03	-2.41E+00	-2.42E+00	5.16E+03
	270	4.62E-02	1.12E-03											7.21E-03		7.21E-03		3.70	3.70E-03	-2.43E+00	-2.14E+00		1.55
	280	7.66E-02	2.39E-03											1.35E-02		1.35E-02		3.57	3.57E-03	-2.45E+00	-1.87E+00		2.09E-02
	290	1.26E-01	4.93E-03											2.50E-02		2.50E-02		3.45	3.45E-03	-2.46E+00	-1.60E+00	-1.99E+01
	298	1.88E-01	8.60E-03											4.02E-02	4.02E-02	4.02E-02		3.36	3.36E-03	-2.47E+00	-1.40E+00	3.08E+02
	310	3.37E-01	1.92E-02											8.04E-02		8.04E-02		3.23	3.23E-03	-2.49E+00	-1.09E+00	-5.17E+01
	320	5.46E-01	3.63E-02											1.41E-01		1.41E-01		3.13	3.13E-03	-2.51E+00	-8.51E-01	#N/A
	330	8.78E-01	6.73E-02											2.43E-01		2.43E-01		3.03	3.03E-03	-2.52E+00	-6.14E-01	#N/A
	340	1.40E+00	1.22E-01											4.13E-01		4.13E-01		2.94	2.94E-03	-2.53E+00	-3.84E-01	A	4.13E-01
	350	2.23E+00	2.16E-01											6.94E-01		6.94E-01		2.86	2.86E-03	-2.54E+00	-1.59E-01	2.01E-52	1.00
	375	6.86E+00	8.35E-01											2.39E+00		2.39E+00		2.67	2.67E-03	-2.57E+00	3.79E-01	n
	400	2.03E+01	2.91E+00											7.69E+00		7.69E+00		2.50	2.50E-03	-2.60E+00	8.86E-01	19.91
	425	5.77E+01	9.29E+00											2.32E+01		2.32E+01		2.35	2.35E-03	-2.63E+00	1.36E+00	Ea	1.00
	450	1.58E+02	2.75E+01											6.59E+01		6.59E+01		2.22	2.22E-03	-2.65E+00	1.82E+00	-710	6.59E+01
	P0				2	2
	P1	1.47E+10	3.00E+08	2.43E+11	-2.30E-01	-2.30E-01
	P2	8.60E+03	1.70E+00	1.01E+04	3.12	3.12										Ea shift
	P3		1.66E+01	7.35E+07	1.32E+01	1.32E+01										7.72E+02
-CH2OO. | -CH2-	T	Miyoshi 2011	Sharma et al. 2010	Otkjaer et al. 2018	Mohamed et al. 2018b	Mohamed et al. 2018a								T-dependence	Target	Final		1000/T	1/T	log(1/T)	log(-CH2OO. | -CH2-)	log(T)	Replicate
	200	3.11E-09	1.41E-11		9.01E-08	9.01E-08								4.60E-05		9.67E-07		5.00	5.00E-03	-2.30E+00	-6.01E+00	A	2.78E-07
	225	3.70E-07	1.78E-09		5.22E-06	5.22E-06								3.23E-04		1.05E-05		4.44	4.44E-03	-2.35E+00	-4.98E+00	2.09E+06	0.29
	250	1.69E-05	8.72E-08		1.39E-04	1.39E-04								1.92E-03		8.76E-05		4.00	4.00E-03	-2.40E+00	-4.06E+00	Ea
	260	6.34E-05	3.37E-07		4.36E-04	4.36E-04								3.76E-03		1.93E-04		3.85	3.85E-03	-2.41E+00	-3.71E+00	5.93E+03
	270	2.16E-04	1.18E-06		1.26E-03	1.26E-03								7.21E-03		4.13E-04		3.70	3.70E-03	-2.43E+00	-3.38E+00		1.55
	280	6.73E-04	3.80E-06		3.41E-03	3.41E-03								1.35E-02		8.59E-04		3.57	3.57E-03	-2.45E+00	-3.07E+00		1.33E-03
	290	1.94E-03	1.13E-05	3.71E-03	8.61E-03	8.61E-03								2.50E-02		1.74E-03		3.45	3.45E-03	-2.46E+00	-2.76E+00	-1.99E+01
	298	4.31E-03	2.56E-05	7.45E-03	1.73E-02	1.73E-02								4.02E-02	3.01E-03	3.01E-03		3.36	3.36E-03	-2.47E+00	-2.52E+00	-2.71E+01
	310	1.32E-02	8.10E-05	2.03E-02	4.65E-02	4.65E-02								8.04E-02		6.66E-03		3.23	3.23E-03	-2.49E+00	-2.18E+00	-5.17E+01
	320	3.13E-02	1.98E-04	4.49E-02	1.00E-01	1.00E-01								1.41E-01		1.26E-02		3.13	3.13E-03	-2.51E+00	-1.90E+00	#N/A
	330	7.07E-02	4.61E-04		2.07E-01	2.07E-01								2.43E-01		2.34E-02		3.03	3.03E-03	-2.52E+00	-1.63E+00	#N/A
	340	1.52E-01	1.02E-03		4.11E-01	4.11E-01								4.13E-01		4.27E-02		2.94	2.94E-03	-2.53E+00	-1.37E+00	A	4.27E-02
	350	3.13E-01	2.17E-03		7.86E-01	7.86E-01								6.94E-01		7.64E-02		2.86	2.86E-03	-2.54E+00	-1.12E+00	2.01E-52	1.00
	375	1.61E+00	1.20E-02		3.46E+00	3.46E+00								2.39E+00		3.05E-01		2.67	2.67E-03	-2.57E+00	-5.15E-01	n
	400	6.76E+00	5.37E-02		1.28E+01	1.28E+01								7.69E+00		1.12E+00		2.50	2.50E-03	-2.60E+00	4.73E-02	19.91
	425	2.39E+01	2.03E-01		4.10E+01	4.10E+01								2.32E+01		3.76E+00		2.35	2.35E-03	-2.63E+00	5.76E-01	Ea	1.00
	450	7.37E+01	6.68E-01		1.17E+02	1.17E+02								6.59E+01		1.18E+01		2.22	2.22E-03	-2.65E+00	1.07E+00	62	1.18E+01
						1
	P1	1.47E+10	1500000000	1.07E-64	3.39E+10	8.00E-01
	P2	7.62E+03	2.2	2.39E+01	8.94E+03	3.06										Ea shift
	P3		1.53E+01	-2.76E+03	8.77E+07	1.12E+01										3.55E+02
-CH2OO. | >CH-	T	Miyoshi 2011	Sharma et al. 2010	Vereecken 2019	Otkjaer et al. 2018	Mohamed et al. 2018a								T-dependence	Target	Final		1000/T	1/T	log(1/T)	log(-CH2OO. | >CH-)	log(T)	Replicate
	200	4.18E-07	8.28E-10	1.26E-03		1.41E-05								1.26E-03		2.13E-04		5.00	5.00E-03	-2.30E+00	-3.67E+00	A	4.76E-05
	225	2.88E-05	7.73E-08	4.55E-03		4.63E-04								4.55E-03		9.38E-04		4.44	4.44E-03	-2.35E+00	-3.03E+00	5.88E+05	0.22
	250	8.51E-04	2.99E-06	1.66E-02		7.82E-03								1.66E-02		4.01E-03		4.00	4.00E-03	-2.40E+00	-2.40E+00	Ea
	260	2.75E-03	1.06E-05	2.78E-02		2.10E-02								2.78E-02		7.08E-03		3.85	3.85E-03	-2.41E+00	-2.15E+00	4.65E+03
	270	8.14E-03	3.46E-05	4.62E-02		5.26E-02								4.62E-02		1.24E-02		3.70	3.70E-03	-2.43E+00	-1.91E+00		1.69
	280	2.23E-02	1.04E-04	7.66E-02		1.24E-01								7.66E-02		2.15E-02		3.57	3.57E-03	-2.45E+00	-1.67E+00		3.64E-02
	290	5.70E-02	2.90E-04	1.26E-01	5.05E-02	2.76E-01								1.26E-01		3.71E-02		3.45	3.45E-03	-2.46E+00	-1.43E+00	-2.39E+01
	298	1.15E-01	6.27E-04	1.88E-01	8.72E-02	5.06E-01								1.88E-01	5.70E-02	5.70E-02		3.36	3.36E-03	-2.47E+00	-1.24E+00	1.04E+03
	310	3.11E-01	1.86E-03	3.37E-01	1.92E-01	1.19E+00								3.37E-01		1.07E-01		3.23	3.23E-03	-2.49E+00	-9.70E-01	-6.40E+01
	320	6.69E-01	4.34E-03	5.46E-01	3.63E-01	2.31E+00								5.46E-01		1.80E-01		3.13	3.13E-03	-2.51E+00	-7.45E-01	#N/A
	330	1.38E+00	9.62E-03	8.78E-01		4.33E+00								8.78E-01		2.99E-01		3.03	3.03E-03	-2.52E+00	-5.24E-01	#N/A
	340	2.72E+00	2.04E-02	1.40E+00		7.83E+00								1.40E+00		4.93E-01		2.94	2.94E-03	-2.53E+00	-3.07E-01	A	4.93E-01
	350	5.15E+00	4.15E-02	2.23E+00		1.37E+01								2.23E+00		8.06E-01		2.86	2.86E-03	-2.54E+00	-9.35E-02	1.07E-64	1.00
	375	2.20E+01	2.10E-01	6.86E+00		4.97E+01								6.86E+00		2.66E+00		2.67	2.67E-03	-2.57E+00	4.25E-01	n
	400	7.83E+01	8.72E-01	2.03E+01		1.55E+02								2.03E+01		8.34E+00		2.50	2.50E-03	-2.60E+00	9.21E-01	23.93
	425	2.40E+02	3.09E+00	5.77E+01		4.27E+02								5.77E+01		2.50E+01		2.35	2.35E-03	-2.63E+00	1.40E+00	Ea	1.00
	450	6.51E+02	9.59E+00	1.58E+02		1.06E+03								1.58E+02		7.17E+01		2.22	2.22E-03	-2.65E+00	1.86E+00	-2406	7.17E+01
	P0				2
	P1	2.48E+10	2.50E+09	3.77E-40	1.50E+00
	P2	9.00E+03	2.20E+00	1.59E+01	2.77											Ea shift
	P3		1.74E+01	1.34E+03	1.43E+01											6.40E+02
>CHOO. | -CH2-	T	Miyoshi 2011	Sharma et al. 2010	Vereecken 2019	Mohamed et al. 2018a									T-dependence	Target	Final		1000/T	1/T	log(1/T)	log(>CHOO. | -CH2-)	log(T)	Replicate
	200	7.10E-10	7.00E-12	1.68E-06	5.00E-09									1.68E-06		6.86E-08		5.00	5.00E-03	-2.30E+00	-7.16E+00	A	2.54E-08
	225	1.05E-07	1.18E-09	2.30E-05	3.77E-07									2.30E-05		1.34E-06		4.44	4.44E-03	-2.35E+00	-5.87E+00	7.46E+06	0.37
	250	5.75E-06	7.26E-08	2.22E-04	1.24E-05									2.22E-04		1.72E-05		4.00	4.00E-03	-2.40E+00	-4.76E+00	Ea
	260	2.30E-05	3.05E-07	5.10E-04	4.18E-05									5.10E-04		4.36E-05		3.85	3.85E-03	-2.41E+00	-4.36E+00	6.66E+03
	270	8.28E-05	1.15E-06	1.12E-03	1.29E-04									1.12E-03		1.05E-04		3.70	3.70E-03	-2.43E+00	-3.98E+00		1.42
	280	2.72E-04	3.97E-06	2.39E-03	3.70E-04									2.39E-03		2.44E-04		3.57	3.57E-03	-2.45E+00	-3.61E+00		3.45E-04
	290	8.25E-04	1.26E-05	4.93E-03	9.90E-04									4.93E-03		5.43E-04		3.45	3.45E-03	-2.46E+00	-3.27E+00	-1.59E+01
	298	1.90E-03	3.01E-05	8.60E-03	2.08E-03									8.60E-03	1.01E-03	1.01E-03		3.36	3.36E-03	-2.47E+00	-3.00E+00	-8.60E+02
	310	6.11E-03	1.03E-04	1.92E-02	5.90E-03									1.92E-02		2.44E-03		3.23	3.23E-03	-2.49E+00	-2.61E+00	-3.94E+01
	320	1.51E-02	2.66E-04	3.63E-02	1.33E-02									3.63E-02		4.92E-03		3.13	3.13E-03	-2.51E+00	-2.31E+00	#N/A
	330	3.55E-02	6.52E-04	6.73E-02	2.87E-02									6.73E-02		9.69E-03		3.03	3.03E-03	-2.52E+00	-2.01E+00	#N/A
	340	7.91E-02	1.52E-03	1.22E-01	5.92E-02									1.22E-01		1.86E-02		2.94	2.94E-03	-2.53E+00	-1.73E+00	A	1.86E-02
	350	1.69E-01	3.38E-03	2.16E-01	1.17E-01									2.16E-01		3.48E-02		2.86	2.86E-03	-2.54E+00	-1.46E+00	3.77E-40	1.00
	375	9.36E-01	2.09E-02	8.35E-01	5.60E-01									8.35E-01		1.52E-01		2.67	2.67E-03	-2.57E+00	-8.19E-01	n
	400	4.20E+00	1.03E-01	2.91E+00	2.22E+00									2.91E+00		5.89E-01		2.50	2.50E-03	-2.60E+00	-2.30E-01	15.89
	425	1.58E+01	4.29E-01	9.29E+00	7.57E+00									9.29E+00		2.06E+00		2.35	2.35E-03	-2.63E+00	3.15E-01	Ea	1.00
	450	5.11E+01	1.53E+00	2.75E+01	2.27E+01									2.75E+01		6.63E+00		2.22	2.22E-03	-2.65E+00	8.22E-01	1981	6.63E+00
				1
	P1	2.14E+10	1.60E+10	5.50E-01
	P2	8.05E+03	2.60E+00	3.24												Ea shift
	P3		1.62E+01	1.14E+01												8.32E+01
>CHOO. | >CH-	T	Miyoshi 2011	Sharma et al. 2010	Mohamed et al. 2018a										T-dependence	Target	Final		1000/T	1/T	log(1/T)	log(>CHOO. | >CH-)	log(T)	Replicate
	200	7.08E-08	4.82E-10	1.72E-05										4.60E-05		3.03E-05		5.00	5.00E-03	-2.30E+00	-4.52E+00	A	8.72E-06
	225	6.20E-06	6.07E-08	6.11E-04										3.23E-04		2.23E-04		4.44	4.44E-03	-2.35E+00	-3.65E+00	2.09E+06	0.29
	250	2.22E-04	2.99E-06	1.10E-02										1.92E-03		1.38E-03		4.00	4.00E-03	-2.40E+00	-2.86E+00	Ea
	260	7.66E-04	1.16E-05	3.02E-02										3.76E-03		2.73E-03		3.85	3.85E-03	-2.41E+00	-2.56E+00	5.24E+03
	270	2.41E-03	4.09E-05	7.73E-02										7.21E-03		5.30E-03		3.70	3.70E-03	-2.43E+00	-2.28E+00		1.55
	280	6.99E-03	1.32E-04	1.86E-01										1.35E-02		1.01E-02		3.57	3.57E-03	-2.45E+00	-2.00E+00		1.56E-02
	290	1.88E-02	3.95E-04	4.22E-01										2.50E-02		1.87E-02		3.45	3.45E-03	-2.46E+00	-1.73E+00	-1.99E+01
	298	3.97E-02	9.02E-04	7.83E-01										4.02E-02	3.04E-02	3.04E-02		3.36	3.36E-03	-2.47E+00	-1.52E+00	2.72E+02
	310	1.13E-01	2.88E-03	1.88E+00										8.04E-02		6.15E-02		3.23	3.23E-03	-2.49E+00	-1.21E+00	-5.17E+01
	320	2.54E-01	7.12E-03	3.71E+00										1.41E-01		1.09E-01		3.13	3.13E-03	-2.51E+00	-9.64E-01	#N/A
	330	5.45E-01	1.67E-02	7.05E+00										2.43E-01		1.89E-01		3.03	3.03E-03	-2.52E+00	-7.24E-01	#N/A
	340	1.12E+00	3.73E-02	1.30E+01										4.13E-01		3.24E-01		2.94	2.94E-03	-2.53E+00	-4.90E-01	A	3.24E-01
	350	2.20E+00	7.98E-02	2.30E+01										6.94E-01		5.47E-01		2.86	2.86E-03	-2.54E+00	-2.62E-01	2.01E-52	1.00
	375	1.02E+01	4.51E-01	8.60E+01										2.39E+00		1.92E+00		2.67	2.67E-03	-2.57E+00	2.83E-01	n
	400	3.89E+01	2.08E+00	2.76E+02										7.69E+00		6.24E+00		2.50	2.50E-03	-2.60E+00	7.95E-01	19.91
	425	1.27E+02	8.07E+00	7.80E+02										2.32E+01		1.90E+01		2.35	2.35E-03	-2.63E+00	1.28E+00	Ea	1.00
	450	3.64E+02	2.72E+01	1.99E+03										6.59E+01		5.47E+01		2.22	2.22E-03	-2.65E+00	1.74E+00	-627	5.47E+01
	P0		2
	P1	2.40E+10	3.40E+00
	P2	8.93E+03	2.47													Ea shift
	P3		1.55E+01													1.14E+03
>C(OO.)- | -CH2-	T	Miyoshi 2011	Mohamed et al. 2018a											T-dependence	Target	Final		1000/T	1/T	log(1/T)	log(>C(OO.)- | -CH2-)	log(T)	Replicate
	200	9.75E-10	3.33E-10											4.60E-05		1.54E-07		5.00	5.00E-03	-2.30E+00	-6.81E+00	A	4.43E-08
	225	1.39E-07	3.39E-08											3.23E-04		2.04E-06		4.44	4.44E-03	-2.35E+00	-5.69E+00	2.09E+06	0.29
	250	7.37E-06	1.41E-06											1.92E-03		2.01E-05		4.00	4.00E-03	-2.40E+00	-4.70E+00	Ea
	260	2.91E-05	5.16E-06											3.76E-03		4.70E-05		3.85	3.85E-03	-2.41E+00	-4.33E+00	6.30E+03
	270	1.04E-04	1.72E-05											7.21E-03		1.06E-04		3.70	3.70E-03	-2.43E+00	-3.97E+00		1.55
	280	3.38E-04	5.28E-05											1.35E-02		2.31E-04		3.57	3.57E-03	-2.45E+00	-3.64E+00		3.58E-04
	290	1.02E-03	1.51E-04											2.50E-02		4.90E-04		3.45	3.45E-03	-2.46E+00	-3.31E+00	-1.99E+01
	298	2.32E-03	3.31E-04											4.02E-02	8.77E-04	8.77E-04		3.36	3.36E-03	-2.47E+00	-3.06E+00	-1.87E+02
	310	7.41E-03	1.01E-03											8.04E-02		2.04E-03		3.23	3.23E-03	-2.49E+00	-2.69E+00	-5.17E+01
	320	1.82E-02	2.39E-03											1.41E-01		4.00E-03		3.13	3.13E-03	-2.51E+00	-2.40E+00	#N/A
	330	4.25E-02	5.40E-03											2.43E-01		7.69E-03		3.03	3.03E-03	-2.52E+00	-2.11E+00	#N/A
	340	9.41E-02	1.16E-02											4.13E-01		1.45E-02		2.94	2.94E-03	-2.53E+00	-1.84E+00	A	1.45E-02
	350	1.99E-01	2.41E-02											6.94E-01		2.67E-02		2.86	2.86E-03	-2.54E+00	-1.57E+00	2.01E-52	1.00
	375	1.09E+00	1.26E-01											2.39E+00		1.15E-01		2.67	2.67E-03	-2.57E+00	-9.41E-01	n
	400	4.84E+00	5.44E-01											7.69E+00		4.45E-01		2.50	2.50E-03	-2.60E+00	-3.52E-01	19.91
	425	1.80E+01	1.99E+00											2.32E+01		1.59E+00		2.35	2.35E-03	-2.63E+00	2.00E-01	Ea	1.00
	450	5.78E+01	6.35E+00											6.59E+01		5.23E+00		2.22	2.22E-03	-2.65E+00	7.19E-01	430	5.23E+00
			1
	P1	2.10E+10	2.77E+00
	P2	7.99E+03	2.6													Ea shift
	P3		1.30E+01													1.47E+02
>C(OO.)- | >CH-	T	Miyoshi 2011	Mohamed et al. 2018a											T-dependence	Target	Final		1000/T	1/T	log(1/T)	log(>C(OO.)- | >CH-)	log(T)	Replicate
	200	9.38E-08	9.52E-08											4.60E-05		2.20E-05		5.00	5.00E-03	-2.30E+00	-4.66E+00	A	6.33E-06
	225	7.94E-06	4.90E-06											3.23E-04		1.68E-04		4.44	4.44E-03	-2.35E+00	-3.77E+00	2.09E+06	0.29
	250	2.77E-04	1.18E-04											1.92E-03		1.07E-03		4.00	4.00E-03	-2.40E+00	-2.97E+00	Ea
	260	9.46E-04	3.58E-04											3.76E-03		2.14E-03		3.85	3.85E-03	-2.41E+00	-2.67E+00	5.30E+03
	270	2.95E-03	1.00E-03											7.21E-03		4.18E-03		3.70	3.70E-03	-2.43E+00	-2.38E+00		1.55
	280	8.50E-03	2.62E-03											1.35E-02		8.01E-03		3.57	3.57E-03	-2.45E+00	-2.10E+00		1.24E-02
	290	2.27E-02	6.42E-03											2.50E-02		1.50E-02		3.45	3.45E-03	-2.46E+00	-1.82E+00	-1.99E+01
	298	4.76E-02	1.26E-02											4.02E-02	2.45E-02	2.45E-02		3.36	3.36E-03	-2.47E+00	-1.61E+00	2.44E+02
	310	1.34E-01	3.27E-02											8.04E-02		5.00E-02		3.23	3.23E-03	-2.49E+00	-1.30E+00	-5.17E+01
	320	3.01E-01	6.87E-02											1.41E-01		8.89E-02		3.13	3.13E-03	-2.51E+00	-1.05E+00	#N/A
	330	6.41E-01	1.38E-01											2.43E-01		1.56E-01		3.03	3.03E-03	-2.52E+00	-8.08E-01	#N/A
	340	1.31E+00	2.68E-01											4.13E-01		2.68E-01		2.94	2.94E-03	-2.53E+00	-5.72E-01	A	2.68E-01
	350	2.56E+00	5.00E-01											6.94E-01		4.56E-01		2.86	2.86E-03	-2.54E+00	-3.41E-01	2.01E-52	1.00
	375	1.17E+01	2.08E+00											2.39E+00		1.62E+00		2.67	2.67E-03	-2.57E+00	2.09E-01	n
	400	4.44E+01	7.33E+00											7.69E+00		5.32E+00		2.50	2.50E-03	-2.60E+00	7.26E-01	19.91
	425	1.44E+02	2.24E+01											2.32E+01		1.64E+01		2.35	2.35E-03	-2.63E+00	1.21E+00	Ea	1.00
	450	4.08E+02	6.13E+01											6.59E+01		4.75E+01		2.22	2.22E-03	-2.65E+00	1.68E+00	-563	4.75E+01
1,7 Hshift
	Average temperature dependence															Ea shift
																0.00E+00
	T	1,6-H-shift												T-dependence	Target	Final		1000/T	1/T	log(1/T)	log()	log(T)	Replicate
	200	4.60E-05												4.60E-05		4.60E-05		5.00	5.00E-03	-2.30E+00	-4.34E+00	A	1.32E-05
	225	3.23E-04												3.23E-04		3.23E-04		4.44	4.44E-03	-2.35E+00	-3.49E+00	2.09E+06	0.29
	250	1.92E-03												1.92E-03		1.92E-03		4.00	4.00E-03	-2.40E+00	-2.72E+00	Ea
	260	3.76E-03												3.76E-03		3.76E-03		3.85	3.85E-03	-2.41E+00	-2.42E+00	5.16E+03
	270	7.21E-03												7.21E-03		7.21E-03		3.70	3.70E-03	-2.43E+00	-2.14E+00		1.55
	280	1.35E-02												1.35E-02		1.35E-02		3.57	3.57E-03	-2.45E+00	-1.87E+00		2.09E-02
	290	2.50E-02												2.50E-02		2.50E-02		3.45	3.45E-03	-2.46E+00	-1.60E+00	-1.99E+01
	298	4.02E-02												4.02E-02	4.02E-02	4.02E-02		3.36	3.36E-03	-2.47E+00	-1.40E+00	3.08E+02
	310	8.04E-02												8.04E-02		8.04E-02		3.23	3.23E-03	-2.49E+00	-1.09E+00	-5.17E+01
	320	1.41E-01												1.41E-01		1.41E-01		3.13	3.13E-03	-2.51E+00	-8.51E-01	#N/A
	330	2.43E-01												2.43E-01		2.43E-01		3.03	3.03E-03	-2.52E+00	-6.14E-01	#N/A
	340	4.13E-01												4.13E-01		4.13E-01		2.94	2.94E-03	-2.53E+00	-3.84E-01	A	4.13E-01
	350	6.94E-01												6.94E-01		6.94E-01		2.86	2.86E-03	-2.54E+00	-1.59E-01	2.01E-52	1.00
	375	2.39E+00												2.39E+00		2.39E+00		2.67	2.67E-03	-2.57E+00	3.79E-01	n
	400	7.69E+00												7.69E+00		7.69E+00		2.50	2.50E-03	-2.60E+00	8.86E-01	19.91
	425	2.32E+01												2.32E+01		2.32E+01		2.35	2.35E-03	-2.63E+00	1.36E+00	Ea	1.00
	450	6.59E+01												6.59E+01		6.59E+01		2.22	2.22E-03	-2.65E+00	1.82E+00	-710	6.59E+01
				2
	P1	11900000000	1.40E+08	-4.30E-01
	P2	9700	1.80E+00	2.9												Ea shift
	P3		1.66E+01	1.22E+01												1.49E+03
-CH2OO. | -CH2-	T	Miyoshi 2011	Sharma et al. 2010	Mohamed et al. 2018a										T-dependence	Target	Final		1000/T	1/T	log(1/T)	log(-CH2OO. | -CH2-)	log(T)	Replicate
	200	1.03E-11	5.58E-12	2.85E-07										4.60E-05		2.70E-08		5.00	5.00E-03	-2.30E+00	-7.57E+00	A	7.75E-09
	225	2.25E-09	7.15E-10	1.21E-05										3.23E-04		4.34E-07		4.44	4.44E-03	-2.35E+00	-6.36E+00	2.09E+06	0.29
	250	1.68E-07	3.54E-08	2.52E-04										1.92E-03		4.99E-06		4.00	4.00E-03	-2.40E+00	-5.30E+00	Ea
	260	7.46E-07	1.38E-07	7.27E-04										3.76E-03		1.23E-05		3.85	3.85E-03	-2.41E+00	-4.91E+00	6.65E+03
	270	2.97E-06	4.84E-07	1.95E-03										7.21E-03		2.91E-05		3.70	3.70E-03	-2.43E+00	-4.54E+00		1.55
	280	1.07E-05	1.56E-06	4.87E-03										1.35E-02		6.66E-05		3.57	3.57E-03	-2.45E+00	-4.18E+00		1.03E-04
	290	3.54E-05	4.65E-06	1.15E-02										2.50E-02		1.47E-04		3.45	3.45E-03	-2.46E+00	-3.83E+00	-1.99E+01
	298	8.69E-05	1.06E-05	2.19E-02										4.02E-02	2.72E-04	2.72E-04		3.36	3.36E-03	-2.47E+00	-3.57E+00	-3.38E+02
	310	3.06E-04	3.36E-05	5.46E-02										8.04E-02		6.61E-04		3.23	3.23E-03	-2.49E+00	-3.18E+00	-5.17E+01
	320	8.15E-04	8.26E-05	1.11E-01										1.41E-01		1.35E-03		3.13	3.13E-03	-2.51E+00	-2.87E+00	#N/A
	330	2.04E-03	1.93E-04	2.18E-01										2.43E-01		2.67E-03		3.03	3.03E-03	-2.52E+00	-2.57E+00	#N/A
	340	4.85E-03	4.28E-04	4.10E-01										4.13E-01		5.19E-03		2.94	2.94E-03	-2.53E+00	-2.28E+00	A	5.19E-03
	350	1.09E-02	9.10E-04	7.47E-01										6.94E-01		9.87E-03		2.86	2.86E-03	-2.54E+00	-2.01E+00	2.01E-52	1.00
	375	6.95E-02	5.06E-03	2.94E+00										2.39E+00		4.52E-02		2.67	2.67E-03	-2.57E+00	-1.34E+00	n
	400	3.50E-01	2.29E-02	9.86E+00										7.69E+00		1.86E-01		2.50	2.50E-03	-2.60E+00	-7.30E-01	19.91
	425	1.46E+00	8.71E-02	2.90E+01										2.32E+01		6.98E-01		2.35	2.35E-03	-2.63E+00	-1.56E-01	Ea	1.00
	450	5.18E+00	2.88E-01	7.64E+01										6.59E+01		2.41E+00		2.22	2.22E-03	-2.65E+00	3.82E-01	778	2.41E+00
					1
	P1	5730000000	1000000000	1.63E+09	8.10E-01
	P2	8430	1.9	8.15E+03	2.68											Ea shift
	P3		14.9	7.44E+07	1.04E+01											3.36E+02
-CH2OO. | >CH-	T	Miyoshi 2011	Sharma et al. 2010	Otkjaer et al. 2018	Mohamed et al. 2018a									T-dependence	Target	Final		1000/T	1/T	log(1/T)	log(-CH2OO. | >CH-)	log(T)	Replicate
	200	2.84E-09	2.45E-09		1.42E-05									4.60E-05		8.56E-06		5.00	5.00E-03	-2.30E+00	-5.07E+00	A	2.46E-06
	225	3.07E-07	1.97E-07		3.57E-04									3.23E-04		7.26E-05		4.44	4.44E-03	-2.35E+00	-4.14E+00	2.09E+06	0.29
	250	1.30E-05	6.75E-06		4.85E-03									1.92E-03		5.01E-04		4.00	4.00E-03	-2.40E+00	-3.30E+00	Ea
	260	4.75E-05	2.31E-05		1.21E-02									3.76E-03		1.03E-03		3.85	3.85E-03	-2.41E+00	-2.99E+00	5.49E+03
	270	1.58E-04	7.21E-05		2.81E-02									7.21E-03		2.08E-03		3.70	3.70E-03	-2.43E+00	-2.68E+00		1.55
	280	4.82E-04	2.08E-04		6.19E-02									1.35E-02		4.08E-03		3.57	3.57E-03	-2.45E+00	-2.39E+00		6.30E-03
	290	1.36E-03	5.61E-04	2.15E-02	1.30E-01									2.50E-02		7.83E-03		3.45	3.45E-03	-2.46E+00	-2.11E+00	-1.99E+01
	298	2.97E-03	1.18E-03	3.59E-02	2.26E-01									4.02E-02	1.30E-02	1.30E-02		3.36	3.36E-03	-2.47E+00	-1.89E+00	1.62E+02
	310	8.87E-03	3.37E-03	7.57E-02	4.97E-01									8.04E-02		2.72E-02		3.23	3.23E-03	-2.49E+00	-1.57E+00	-5.17E+01
	320	2.08E-02	7.63E-03	1.37E-01	9.16E-01									1.41E-01		4.93E-02		3.13	3.13E-03	-2.51E+00	-1.31E+00	#N/A
	330	4.61E-02	1.65E-02		1.63E+00									2.43E-01		8.77E-02		3.03	3.03E-03	-2.52E+00	-1.06E+00	#N/A
	340	9.78E-02	3.40E-02		2.82E+00									4.13E-01		1.54E-01		2.94	2.94E-03	-2.53E+00	-8.13E-01	A	1.54E-01
	350	1.99E-01	6.74E-02		4.73E+00									6.94E-01		2.65E-01		2.86	2.86E-03	-2.54E+00	-5.76E-01	2.01E-52	1.00
	375	9.89E-01	3.21E-01		1.54E+01									2.39E+00		9.76E-01		2.67	2.67E-03	-2.57E+00	-1.04E-02	n
	400	4.03E+00	1.27E+00		4.39E+01									7.69E+00		3.32E+00		2.50	2.50E-03	-2.60E+00	5.21E-01	19.91
	425	1.39E+01	4.28E+00		1.12E+02									2.32E+01		1.05E+01		2.35	2.35E-03	-2.63E+00	1.02E+00	Ea	1.00
	450	4.19E+01	1.27E+01		2.58E+02									6.59E+01		3.12E+01		2.22	2.22E-03	-2.65E+00	1.49E+00	-374	3.12E+01
	P0		2
	P1	27700000000	1.14E+00
	P2	10400	2.65													Ea shift
	P3		1.25E+01													1.28E+03
>CHOO. | -CH2-	T	Miyoshi 2011	Mohamed et al. 2018a											T-dependence	Target	Final		1000/T	1/T	log(1/T)	log(>CHOO. | -CH2-)	log(T)	Replicate
	200	7.23E-13	1.71E-07											4.60E-05		7.55E-08		5.00	5.00E-03	-2.30E+00	-7.12E+00	A	2.17E-08
	225	2.34E-10	7.70E-06											3.23E-04		1.08E-06		4.44	4.44E-03	-2.35E+00	-5.97E+00	2.09E+06	0.29
	250	2.38E-08	1.67E-04											1.92E-03		1.14E-05		4.00	4.00E-03	-2.40E+00	-4.94E+00	Ea
	260	1.18E-07	4.87E-04											3.76E-03		2.71E-05		3.85	3.85E-03	-2.41E+00	-4.57E+00	6.44E+03
	270	5.18E-07	1.32E-03											7.21E-03		6.24E-05		3.70	3.70E-03	-2.43E+00	-4.20E+00		1.55
	280	2.05E-06	3.34E-03											1.35E-02		1.39E-04		3.57	3.57E-03	-2.45E+00	-3.86E+00		2.15E-04
	290	7.38E-06	7.95E-03											2.50E-02		3.00E-04		3.45	3.45E-03	-2.46E+00	-3.52E+00	-1.99E+01
	298	1.93E-05	1.53E-02											4.02E-02	5.44E-04	5.44E-04		3.36	3.36E-03	-2.47E+00	-3.26E+00	-2.49E+02
	310	7.46E-05	3.85E-02											8.04E-02		1.29E-03		3.23	3.23E-03	-2.49E+00	-2.89E+00	-5.17E+01
	320	2.13E-04	7.89E-02											1.41E-01		2.56E-03		3.13	3.13E-03	-2.51E+00	-2.59E+00	#N/A
	330	5.70E-04	1.55E-01											2.43E-01		4.99E-03		3.03	3.03E-03	-2.52E+00	-2.30E+00	#N/A
	340	1.44E-03	2.94E-01											4.13E-01		9.52E-03		2.94	2.94E-03	-2.53E+00	-2.02E+00	A	9.52E-03
	350	3.45E-03	5.39E-01											6.94E-01		1.78E-02		2.86	2.86E-03	-2.54E+00	-1.75E+00	2.01E-52	1.00
	375	2.50E-02	2.15E+00											2.39E+00		7.84E-02		2.67	2.67E-03	-2.57E+00	-1.11E+00	n
	400	1.42E-01	7.27E+00											7.69E+00		3.12E-01		2.50	2.50E-03	-2.60E+00	-5.06E-01	19.91
	425	6.53E-01	2.15E+01											2.32E+01		1.13E+00		2.35	2.35E-03	-2.63E+00	5.44E-02	Ea	1.00
	450	2.54E+00	5.70E+01											6.59E+01		3.81E+00		2.22	2.22E-03	-2.65E+00	5.81E-01	572	3.81E+00
	P0		1
	P1	16100000000	2.62E+00
	P2	8900	2.39													Ea shift
	P3		1.10E+01													3.39E+02
>CHOO. | >CH-	T	Miyoshi 2011	Mohamed et al. 2018a											T-dependence	Target	Final		1000/T	1/T	log(1/T)	log(>CHOO. | >CH-)	log(T)	Replicate
	200	7.60E-10	4.13E-06											4.60E-05		8.44E-06		5.00	5.00E-03	-2.30E+00	-5.07E+00	A	2.43E-06
	225	1.07E-07	1.19E-04											3.23E-04		7.16E-05		4.44	4.44E-03	-2.35E+00	-4.14E+00	2.09E+06	0.29
	250	5.57E-06	1.79E-03											1.92E-03		4.95E-04		4.00	4.00E-03	-2.40E+00	-3.31E+00	Ea
	260	2.19E-05	4.60E-03											3.76E-03		1.02E-03		3.85	3.85E-03	-2.41E+00	-2.99E+00	5.50E+03
	270	7.78E-05	1.11E-02											7.21E-03		2.05E-03		3.70	3.70E-03	-2.43E+00	-2.69E+00		1.55
	280	2.53E-04	2.51E-02											1.35E-02		4.03E-03		3.57	3.57E-03	-2.45E+00	-2.39E+00		6.24E-03
	290	7.56E-04	5.40E-02											2.50E-02		7.75E-03		3.45	3.45E-03	-2.46E+00	-2.11E+00	-1.99E+01
	298	1.72E-03	9.62E-02											4.02E-02	1.29E-02	1.29E-02		3.36	3.36E-03	-2.47E+00	-1.89E+00	1.61E+02
	310	5.47E-03	2.17E-01											8.04E-02		2.69E-02		3.23	3.23E-03	-2.49E+00	-1.57E+00	-5.17E+01
	320	1.34E-02	4.09E-01											1.41E-01		4.88E-02		3.13	3.13E-03	-2.51E+00	-1.31E+00	#N/A
	330	3.12E-02	7.44E-01											2.43E-01		8.70E-02		3.03	3.03E-03	-2.52E+00	-1.06E+00	#N/A
	340	6.89E-02	1.31E+00											4.13E-01		1.52E-01		2.94	2.94E-03	-2.53E+00	-8.17E-01	A	1.52E-01
	350	1.46E-01	2.23E+00											6.94E-01		2.63E-01		2.86	2.86E-03	-2.54E+00	-5.80E-01	2.01E-52	1.00
	375	7.94E-01	7.56E+00											2.39E+00		9.69E-01		2.67	2.67E-03	-2.57E+00	-1.37E-02	n
	400	3.50E+00	2.22E+01											7.69E+00		3.29E+00		2.50	2.50E-03	-2.60E+00	5.18E-01	19.91
	425	1.29E+01	5.79E+01											2.32E+01		1.04E+01		2.35	2.35E-03	-2.63E+00	1.02E+00	Ea	1.00
	450	4.14E+01	1.37E+02											6.59E+01		3.10E+01		2.22	2.22E-03	-2.65E+00	1.49E+00	-371	3.10E+01
	P0		2
	P1	19400000000	1.79E+00
	P2	10740	2.4													Ea shift
	P3		1.24E+01													1.60E+03
>C(OO.)- | -CH2-	T	Miyoshi 2011	Mohamed et al. 2018a											T-dependence	Target	Final		1000/T	1/T	log(1/T)	log(>C(OO.)- | -CH2-)	log(T)	Replicate
	200	9.25E-14	1.12E-07											4.60E-05		1.58E-08		5.00	5.00E-03	-2.30E+00	-7.80E+00	A	4.54E-09
	225	3.61E-11	4.77E-06											3.23E-04		2.69E-07		4.44	4.44E-03	-2.35E+00	-6.57E+00	2.09E+06	0.29
	250	4.27E-09	9.83E-05											1.92E-03		3.25E-06		4.00	4.00E-03	-2.40E+00	-5.49E+00	Ea
	260	2.23E-08	2.82E-04											3.76E-03		8.14E-06		3.85	3.85E-03	-2.41E+00	-5.09E+00	6.75E+03
	270	1.03E-07	7.51E-04											7.21E-03		1.96E-05		3.70	3.70E-03	-2.43E+00	-4.71E+00		1.55
	280	4.26E-07	1.87E-03											1.35E-02		4.54E-05		3.57	3.57E-03	-2.45E+00	-4.34E+00		7.02E-05
	290	1.60E-06	4.39E-03											2.50E-02		1.02E-04		3.45	3.45E-03	-2.46E+00	-3.99E+00	-1.99E+01
	298	4.32E-06	8.35E-03											4.02E-02	1.90E-04	1.90E-04		3.36	3.36E-03	-2.47E+00	-3.72E+00	-3.85E+02
	310	1.74E-05	2.07E-02											8.04E-02		4.68E-04		3.23	3.23E-03	-2.49E+00	-3.33E+00	-5.17E+01
	320	5.15E-05	4.18E-02											1.41E-01		9.63E-04		3.13	3.13E-03	-2.51E+00	-3.02E+00	#N/A
	330	1.42E-04	8.13E-02											2.43E-01		1.93E-03		3.03	3.03E-03	-2.52E+00	-2.71E+00	#N/A
	340	3.71E-04	1.52E-01											4.13E-01		3.79E-03		2.94	2.94E-03	-2.53E+00	-2.42E+00	A	3.79E-03
	350	9.14E-04	2.76E-01											6.94E-01		7.27E-03		2.86	2.86E-03	-2.54E+00	-2.14E+00	2.01E-52	1.00
	375	7.07E-03	1.07E+00											2.39E+00		3.40E-02		2.67	2.67E-03	-2.57E+00	-1.47E+00	n
	400	4.24E-02	3.53E+00											7.69E+00		1.42E-01		2.50	2.50E-03	-2.60E+00	-8.47E-01	19.91
	425	2.06E-01	1.02E+01											2.32E+01		5.42E-01		2.35	2.35E-03	-2.63E+00	-2.66E-01	Ea	1.00
	450	8.37E-01	2.65E+01											6.59E+01		1.90E+00		2.22	2.22E-03	-2.65E+00	2.79E-01	886	1.90E+00
	P0		1
	P1	10200000000	1.70E+00
	P2	9260	2.6													Ea shift
	P3		1.04E+01													3.95E+02
>C(OO.)- | >CH-	T	Miyoshi 2011	Mohamed et al. 2018a											T-dependence	Target	Final		1000/T	1/T	log(1/T)	log(>C(OO.)- | >CH-)	log(T)	Replicate
	200	7.96E-11	2.27E-05											4.60E-05		6.38E-06		5.00	5.00E-03	-2.30E+00	-5.20E+00	A	1.84E-06
	225	1.36E-08	5.64E-04											3.23E-04		5.59E-05		4.44	4.44E-03	-2.35E+00	-4.25E+00	2.09E+06	0.29
	250	8.36E-07	7.59E-03											1.92E-03		3.96E-04		4.00	4.00E-03	-2.40E+00	-3.40E+00	Ea
	260	3.48E-06	1.88E-02											3.76E-03		8.24E-04		3.85	3.85E-03	-2.41E+00	-3.08E+00	5.55E+03
	270	1.30E-05	4.37E-02											7.21E-03		1.67E-03		3.70	3.70E-03	-2.43E+00	-2.78E+00		1.55
	280	4.42E-05	9.61E-02											1.35E-02		3.30E-03		3.57	3.57E-03	-2.45E+00	-2.48E+00		5.11E-03
	290	1.38E-04	2.01E-01											2.50E-02		6.39E-03		3.45	3.45E-03	-2.46E+00	-2.19E+00	-1.99E+01
	298	3.26E-04	3.49E-01											4.02E-02	1.07E-02	1.07E-02		3.36	3.36E-03	-2.47E+00	-1.97E+00	1.37E+02
	310	1.09E-03	7.64E-01											8.04E-02		2.25E-02		3.23	3.23E-03	-2.49E+00	-1.65E+00	-5.17E+01
	320	2.76E-03	1.41E+00											1.41E-01		4.10E-02		3.13	3.13E-03	-2.51E+00	-1.39E+00	#N/A
	330	6.64E-03	2.50E+00											2.43E-01		7.34E-02		3.03	3.03E-03	-2.52E+00	-1.13E+00	#N/A
	340	1.52E-02	4.31E+00											4.13E-01		1.29E-01		2.94	2.94E-03	-2.53E+00	-8.88E-01	A	1.29E-01
	350	3.30E-02	7.22E+00											6.94E-01		2.24E-01		2.86	2.86E-03	-2.54E+00	-6.49E-01	2.01E-52	1.00
	375	1.92E-01	2.34E+01											2.39E+00		8.35E-01		2.67	2.67E-03	-2.57E+00	-7.84E-02	n
	400	9.01E-01	6.62E+01											7.69E+00		2.86E+00		2.50	2.50E-03	-2.60E+00	4.57E-01	19.91
	425	3.52E+00	1.67E+02											2.32E+01		9.14E+00		2.35	2.35E-03	-2.63E+00	9.61E-01	Ea	1.00
	450	1.18E+01	3.85E+02											6.59E+01		2.74E+01		2.22	2.22E-03	-2.65E+00	1.44E+00	-315	2.74E+01

## Sheet: Plot OOHscrambling
Scrambling -OOH hydrogen atoms
	Average temperature dependence															Ea shift
																0.00E+00
	T	Vereecken 1,8 ps	Vereecken 1,8 sp											T-dependence	Target	Final		1000/T	1/T	log(1/T)	log()	log(T)	Replicate
	200	6.43E+01	3.97E+00											1.60E+01		1.60E+01		5.00	5.00E-03	-2.30E+00	1.20E+00	A	9.41E+00
	225	1.02E+02	1.11E+01											3.37E+01		3.37E+01		4.44	4.44E-03	-2.35E+00	1.53E+00	2.55E+05	0.59
	250	1.65E+02	2.74E+01											6.72E+01		6.72E+01		4.00	4.00E-03	-2.40E+00	1.83E+00	Ea
	260	2.00E+02	3.82E+01											8.74E+01		8.74E+01		3.85	3.85E-03	-2.41E+00	1.94E+00	2.04E+03
	270	2.43E+02	5.23E+01											1.13E+02		1.13E+02		3.70	3.70E-03	-2.43E+00	2.05E+00		1.20
	280	2.95E+02	7.07E+01											1.44E+02		1.44E+02		3.57	3.57E-03	-2.45E+00	2.16E+00		1.74E+02
	290	3.58E+02	9.45E+01											1.84E+02		1.84E+02		3.45	3.45E-03	-2.46E+00	2.26E+00	-8.46E+00
	298	4.17E+02	1.18E+02											2.22E+02	2.22E+02	2.22E+02		3.36	3.36E-03	-2.47E+00	2.35E+00	1.96E+02
	310	5.25E+02	1.63E+02											2.92E+02		2.92E+02		3.23	3.23E-03	-2.49E+00	2.47E+00	-1.92E+01
	320	6.34E+02	2.11E+02											3.66E+02		3.66E+02		3.13	3.13E-03	-2.51E+00	2.56E+00	#N/A
	330	7.64E+02	2.70E+02											4.54E+02		4.54E+02		3.03	3.03E-03	-2.52E+00	2.66E+00	#N/A
	340	9.20E+02	3.43E+02											5.62E+02		5.62E+02		2.94	2.94E-03	-2.53E+00	2.75E+00	A	5.62E+02
	350	1.10E+03	4.33E+02											6.91E+02		6.91E+02		2.86	2.86E-03	-2.54E+00	2.84E+00	5.64E-20	1.00
	375	1.73E+03	7.48E+02											1.14E+03		1.14E+03		2.67	2.67E-03	-2.57E+00	3.06E+00	n
	400	2.67E+03	1.24E+03											1.82E+03		1.82E+03		2.50	2.50E-03	-2.60E+00	3.26E+00	8.46
	425	4.07E+03	1.99E+03											2.85E+03		2.85E+03		2.35	2.35E-03	-2.63E+00	3.45E+00	Ea	1.00
	450	6.12E+03	3.10E+03											4.35E+03		4.35E+03		2.22	2.22E-03	-2.65E+00	3.64E+00	-452	4.35E+03
1,6 Hshift														Scaling:	4.80E+02
	P1	8.69E+08
	P2	6.41E+03														Ea shift
	P3															4.66E+01
-CH2OO. | -CH3	T	Miyoshi 2011												T-dependence	Target	Final		1000/T	1/T	log(1/T)	log(-CH2OO. | -CH3)	log(T)	Replicate
	200	1.05E-05												1.60E+01		1.27E+01		5.00	5.00E-03	-2.30E+00	1.10E+00	A	7.45E+00
	225	3.69E-04												3.37E+01		2.74E+01		4.44	4.44E-03	-2.35E+00	1.44E+00	2.55E+05	0.59
	250	6.36E-03												6.72E+01		5.58E+01		4.00	4.00E-03	-2.40E+00	1.75E+00	Ea
	260	1.71E-02												8.74E+01		7.30E+01		3.85	3.85E-03	-2.41E+00	1.86E+00	2.09E+03
	270	4.25E-02												1.13E+02		9.49E+01		3.70	3.70E-03	-2.43E+00	1.98E+00		1.20
	280	9.93E-02												1.44E+02		1.22E+02		3.57	3.57E-03	-2.45E+00	2.09E+00		1.47E+02
	290	2.19E-01												1.84E+02		1.57E+02		3.45	3.45E-03	-2.46E+00	2.19E+00	-8.46E+00
	298	3.96E-01												2.22E+02	1.90E+02	1.90E+02		3.36	3.36E-03	-2.47E+00	2.28E+00	1.76E+02
	310	9.10E-01												2.92E+02		2.52E+02		3.23	3.23E-03	-2.49E+00	2.40E+00	-1.92E+01
	320	1.74E+00												3.66E+02		3.16E+02		3.13	3.13E-03	-2.51E+00	2.50E+00	#N/A
	330	3.19E+00												4.54E+02		3.95E+02		3.03	3.03E-03	-2.52E+00	2.60E+00	#N/A
	340	5.64E+00												5.62E+02		4.90E+02		2.94	2.94E-03	-2.53E+00	2.69E+00	A	4.90E+02
	350	9.67E+00												6.91E+02		6.05E+02		2.86	2.86E-03	-2.54E+00	2.78E+00	5.64E-20	1.00
	375	3.28E+01												1.14E+03		1.00E+03		2.67	2.67E-03	-2.57E+00	3.00E+00	n
	400	9.54E+01												1.82E+03		1.62E+03		2.50	2.50E-03	-2.60E+00	3.21E+00	8.46
	425	2.45E+02												2.85E+03		2.55E+03		2.35	2.35E-03	-2.63E+00	3.41E+00	Ea	1.00
	450	5.66E+02												4.35E+03		3.92E+03		2.22	2.22E-03	-2.65E+00	3.59E+00	-405	3.92E+03
	P0
	P1	6.75E+09
	P2	6.63E+03														Ea shift
	P3															-3.44E+02
-CH2OO. | -CH2-	T	Miyoshi 2011												T-dependence	Target	Final		1000/T	1/T	log(1/T)	log(-CH2OO. | -CH2-)	log(T)	Replicate
	200	2.71E-05												1.60E+01		8.94E+01		5.00	5.00E-03	-2.30E+00	1.95E+00	A	5.26E+01
	225	1.08E-03												3.37E+01		1.56E+02		4.44	4.44E-03	-2.35E+00	2.19E+00	2.55E+05	0.59
	250	2.05E-02												6.72E+01		2.66E+02		4.00	4.00E-03	-2.40E+00	2.43E+00	Ea
	260	5.69E-02												8.74E+01		3.28E+02		3.85	3.85E-03	-2.41E+00	2.52E+00	1.70E+03
	270	1.46E-01												1.13E+02		4.04E+02		3.70	3.70E-03	-2.43E+00	2.61E+00		1.20
	280	3.51E-01												1.44E+02		4.94E+02		3.57	3.57E-03	-2.45E+00	2.69E+00		5.95E+02
	290	7.95E-01												1.84E+02		6.03E+02		3.45	3.45E-03	-2.46E+00	2.78E+00	-8.46E+00
	298	1.47E+00												2.22E+02	7.05E+02	7.05E+02		3.36	3.36E-03	-2.47E+00	2.85E+00	3.46E+02
	310	3.48E+00												2.92E+02		8.88E+02		3.23	3.23E-03	-2.49E+00	2.95E+00	-1.92E+01
	320	6.78E+00												3.66E+02		1.07E+03		3.13	3.13E-03	-2.51E+00	3.03E+00	#N/A
	330	1.27E+01												4.54E+02		1.29E+03		3.03	3.03E-03	-2.52E+00	3.11E+00	#N/A
	340	2.29E+01												5.62E+02		1.55E+03		2.94	2.94E-03	-2.53E+00	3.19E+00	A	1.55E+03
	350	4.00E+01												6.91E+02		1.85E+03		2.86	2.86E-03	-2.54E+00	3.27E+00	5.64E-20	1.00
	375	1.42E+02												1.14E+03		2.85E+03		2.67	2.67E-03	-2.57E+00	3.45E+00	n
	400	4.27E+02												1.82E+03		4.31E+03		2.50	2.50E-03	-2.60E+00	3.63E+00	8.46
	425	1.13E+03												2.85E+03		6.40E+03		2.35	2.35E-03	-2.63E+00	3.81E+00	Ea	1.00
	450	2.70E+03												4.35E+03		9.35E+03		2.22	2.22E-03	-2.65E+00	3.97E+00	-796	9.35E+03
	P1	3840000000
	P2	6330														Ea shift
	P3															-4.76E+02
-CH2OO. | >CH-	T	Miyoshi 2011												T-dependence	Target	Final		1000/T	1/T	log(1/T)	log(-CH2OO. | >CH-)	log(T)	Replicate
	200	6.90E-05												1.60E+01		1.73E+02		5.00	5.00E-03	-2.30E+00	2.24E+00	A	1.02E+02
	225	2.32E-03												3.37E+01		2.80E+02		4.44	4.44E-03	-2.35E+00	2.45E+00	2.55E+05	0.59
	250	3.87E-02												6.72E+01		4.51E+02		4.00	4.00E-03	-2.40E+00	2.65E+00	Ea
	260	1.03E-01												8.74E+01		5.45E+02		3.85	3.85E-03	-2.41E+00	2.74E+00	1.57E+03
	270	2.53E-01												1.13E+02		6.58E+02		3.70	3.70E-03	-2.43E+00	2.82E+00		1.20
	280	5.84E-01												1.44E+02		7.91E+02		3.57	3.57E-03	-2.45E+00	2.90E+00		9.53E+02
	290	1.27E+00												1.84E+02		9.50E+02		3.45	3.45E-03	-2.46E+00	2.98E+00	-8.46E+00
	298	2.29E+00												2.22E+02	1.10E+03	1.10E+03		3.36	3.36E-03	-2.47E+00	3.04E+00	4.03E+02
	310	5.20E+00												2.92E+02		1.36E+03		3.23	3.23E-03	-2.49E+00	3.13E+00	-1.92E+01
	320	9.85E+00												3.66E+02		1.62E+03		3.13	3.13E-03	-2.51E+00	3.21E+00	#N/A
	330	1.79E+01												4.54E+02		1.92E+03		3.03	3.03E-03	-2.52E+00	3.28E+00	#N/A
	340	3.15E+01												5.62E+02		2.28E+03		2.94	2.94E-03	-2.53E+00	3.36E+00	A	2.28E+03
	350	5.37E+01												6.91E+02		2.70E+03		2.86	2.86E-03	-2.54E+00	3.43E+00	5.64E-20	1.00
	375	1.79E+02												1.14E+03		4.05E+03		2.67	2.67E-03	-2.57E+00	3.61E+00	n
	400	5.15E+02												1.82E+03		5.99E+03		2.50	2.50E-03	-2.60E+00	3.78E+00	8.46
	425	1.31E+03												2.85E+03		8.73E+03		2.35	2.35E-03	-2.63E+00	3.94E+00	Ea	1.00
	450	2.99E+03												4.35E+03		1.25E+04		2.22	2.22E-03	-2.65E+00	4.10E+00	-928	1.25E+04
	P0		1
	P1	9340000000	2.02E+00
	P2	7110	2.77													Ea shift
	P3		1.35E+01													6.49E+02
>CHOO. | -CH3	T	Miyoshi 2011	Mohamed et al. 2018b											T-dependence	Target	Final		1000/T	1/T	log(1/T)	log(>CHOO. | -CH3)	log(T)	Replicate
	200	3.40E-06	3.15E-08											1.60E+01		6.22E-01		5.00	5.00E-03	-2.30E+00	-2.07E-01	A	3.66E-01
	225	1.76E-04	1.90E-06											3.37E+01		1.88E+00		4.44	4.44E-03	-2.35E+00	2.74E-01	2.55E+05	0.59
	250	4.16E-03	5.21E-05											6.72E+01		5.00E+00		4.00	4.00E-03	-2.40E+00	6.99E-01	Ea
	260	1.24E-02	1.65E-04											8.74E+01		7.19E+00		3.85	3.85E-03	-2.41E+00	8.57E-01	2.69E+03
	270	3.42E-02	4.83E-04											1.13E+02		1.02E+01		3.70	3.70E-03	-2.43E+00	1.01E+00		1.20
	280	8.76E-02	1.31E-03											1.44E+02		1.42E+01		3.57	3.57E-03	-2.45E+00	1.15E+00		1.71E+01
	290	2.10E-01	3.34E-03											1.84E+02		1.96E+01		3.45	3.45E-03	-2.46E+00	1.29E+00	-8.46E+00
	298	4.06E-01	6.75E-03											2.22E+02	2.51E+01	2.51E+01		3.36	3.36E-03	-2.47E+00	1.40E+00	-8.58E+01
	310	1.02E+00	1.82E-02											2.92E+02		3.60E+01		3.23	3.23E-03	-2.49E+00	1.56E+00	-1.92E+01
	320	2.09E+00	3.94E-02											3.66E+02		4.80E+01		3.13	3.13E-03	-2.51E+00	1.68E+00	#N/A
	330	4.10E+00	8.17E-02											4.54E+02		6.35E+01		3.03	3.03E-03	-2.52E+00	1.80E+00	#N/A
	340	7.74E+00	1.63E-01											5.62E+02		8.32E+01		2.94	2.94E-03	-2.53E+00	1.92E+00	A	8.32E+01
	350	1.41E+01	3.12E-01											6.91E+02		1.08E+02		2.86	2.86E-03	-2.54E+00	2.03E+00	5.64E-20	1.00
	375	5.45E+01	1.38E+00											1.14E+03		2.01E+02		2.67	2.67E-03	-2.57E+00	2.30E+00	n
	400	1.78E+02	5.11E+00											1.82E+03		3.59E+02		2.50	2.50E-03	-2.60E+00	2.56E+00	8.46
	425	5.07E+02	1.64E+01											2.85E+03		6.18E+02		2.35	2.35E-03	-2.63E+00	2.79E+00	Ea	1.00
	450	1.28E+03	4.67E+01											4.35E+03		1.03E+03		2.22	2.22E-03	-2.65E+00	3.01E+00	198	1.03E+03
	P1	12900000000
	P2	6590														Ea shift
	P3															-5.77E+02
>CHOO. | -CH2-	T	Miyoshi 2011												T-dependence	Target	Final		1000/T	1/T	log(1/T)	log(>CHOO. | -CH2-)	log(T)	Replicate
	200	6.32E-05												1.60E+01		2.86E+02		5.00	5.00E-03	-2.30E+00	2.46E+00	A	1.69E+02
	225	2.46E-03												3.37E+01		4.38E+02		4.44	4.44E-03	-2.35E+00	2.64E+00	2.55E+05	0.59
	250	4.60E-02												6.72E+01		6.77E+02		4.00	4.00E-03	-2.40E+00	2.83E+00	Ea
	260	1.27E-01												8.74E+01		8.05E+02		3.85	3.85E-03	-2.41E+00	2.91E+00	1.46E+03
	270	3.24E-01												1.13E+02		9.57E+02		3.70	3.70E-03	-2.43E+00	2.98E+00		1.20
	280	7.75E-01												1.44E+02		1.14E+03		3.57	3.57E-03	-2.45E+00	3.06E+00		1.37E+03
	290	1.74E+00												1.84E+02		1.35E+03		3.45	3.45E-03	-2.46E+00	3.13E+00	-8.46E+00
	298	3.21E+00												2.22E+02	1.54E+03	1.54E+03		3.36	3.36E-03	-2.47E+00	3.19E+00	4.47E+02
	310	7.56E+00												2.92E+02		1.88E+03		3.23	3.23E-03	-2.49E+00	3.27E+00	-1.92E+01
	320	1.47E+01												3.66E+02		2.22E+03		3.13	3.13E-03	-2.51E+00	3.35E+00	#N/A
	330	2.74E+01												4.54E+02		2.61E+03		3.03	3.03E-03	-2.52E+00	3.42E+00	#N/A
	340	4.93E+01												5.62E+02		3.07E+03		2.94	2.94E-03	-2.53E+00	3.49E+00	A	3.07E+03
	350	8.58E+01												6.91E+02		3.60E+03		2.86	2.86E-03	-2.54E+00	3.56E+00	5.64E-20	1.00
	375	3.01E+02												1.14E+03		5.30E+03		2.67	2.67E-03	-2.57E+00	3.72E+00	n
	400	9.03E+02												1.82E+03		7.71E+03		2.50	2.50E-03	-2.60E+00	3.89E+00	8.46
	425	2.38E+03												2.85E+03		1.11E+04		2.35	2.35E-03	-2.63E+00	4.04E+00	Ea	1.00
	450	5.63E+03												4.35E+03		1.57E+04		2.22	2.22E-03	-2.65E+00	4.20E+00	-1029	1.57E+04
	P0			1
	P1	9060000000		-5.20E-01
	P2	5840		3.47												Ea shift
	P3			1.28E+01												-1.22E+03
>CHOO. | >CH-	T	Miyoshi 2011	Praske et al. 2019	Mohamed et al. 2018b										T-dependence	Target	Final		1000/T	1/T	log(1/T)	log(>CHOO. | >CH-)	log(T)	Replicate
	200	1.89E-03		5.89E-07										1.60E+01		7.20E+03		5.00	5.00E-03	-2.30E+00	3.86E+00	A	4.24E+03
	225	4.84E-02		3.18E-05										3.37E+01		7.69E+03		4.44	4.44E-03	-2.35E+00	3.89E+00	2.55E+05	0.59
	250	6.49E-01		8.02E-04										6.72E+01		8.92E+03		4.00	4.00E-03	-2.40E+00	3.95E+00	Ea
	260	1.59E+00		2.48E-03										8.74E+01		9.61E+03		3.85	3.85E-03	-2.41E+00	3.98E+00	8.20E+02
	270	3.66E+00		7.07E-03										1.13E+02		1.04E+04		3.70	3.70E-03	-2.43E+00	4.02E+00		1.20
	280	7.92E+00		1.88E-02										1.44E+02		1.14E+04		3.57	3.57E-03	-2.45E+00	4.06E+00		1.37E+04
	290	1.63E+01		4.69E-02										1.84E+02		1.24E+04		3.45	3.45E-03	-2.46E+00	4.09E+00	-8.46E+00
	298	2.79E+01	4.00E+03	9.37E-02										2.22E+02	1.34E+04	1.34E+04		3.36	3.36E-03	-2.47E+00	4.13E+00	7.27E+02
	310	5.96E+01		2.48E-01										2.92E+02		1.51E+04		3.23	3.23E-03	-2.49E+00	4.18E+00	-1.92E+01
	320	1.07E+02		5.30E-01										3.66E+02		1.67E+04		3.13	3.13E-03	-2.51E+00	4.22E+00	#N/A
	330	1.87E+02		1.09E+00										4.54E+02		1.84E+04		3.03	3.03E-03	-2.52E+00	4.27E+00	#N/A
	340	3.14E+02		2.14E+00										5.62E+02		2.04E+04		2.94	2.94E-03	-2.53E+00	4.31E+00	A	2.04E+04
	350	5.14E+02		4.06E+00										6.91E+02		2.27E+04		2.86	2.86E-03	-2.54E+00	4.36E+00	5.64E-20	1.00
	375	1.56E+03		1.76E+01										1.14E+03		2.96E+04		2.67	2.67E-03	-2.57E+00	4.47E+00	n
	400	4.13E+03		6.44E+01										1.82E+03		3.87E+04		2.50	2.50E-03	-2.60E+00	4.59E+00	8.46
	425	9.76E+03		2.05E+02										2.85E+03		5.05E+04		2.35	2.35E-03	-2.63E+00	4.70E+00	Ea	1.00
	450	2.09E+04		5.80E+02										4.35E+03		6.58E+04		2.22	2.22E-03	-2.65E+00	4.82E+00	-1674	6.58E+04
	P1	4480000000
	P2	6820														Ea shift
	P3															-3.22E+01
>C(OO.)- | -CH3	T	Miyoshi 2011												T-dependence	Target	Final		1000/T	1/T	log(1/T)	log(>C(OO.)- | -CH3)	log(T)	Replicate
	200	6.95E-06												1.60E+01		1.88E+01		5.00	5.00E-03	-2.30E+00	1.27E+00	A	1.10E+01
	225	3.07E-04												3.37E+01		3.89E+01		4.44	4.44E-03	-2.35E+00	1.59E+00	2.55E+05	0.59
	250	6.36E-03												6.72E+01		7.64E+01		4.00	4.00E-03	-2.40E+00	1.88E+00	Ea
	260	1.82E-02												8.74E+01		9.89E+01		3.85	3.85E-03	-2.41E+00	2.00E+00	2.01E+03
	270	4.80E-02												1.13E+02		1.27E+02		3.70	3.70E-03	-2.43E+00	2.10E+00		1.20
	280	1.18E-01												1.44E+02		1.62E+02		3.57	3.57E-03	-2.45E+00	2.21E+00		1.95E+02
	290	2.74E-01												1.84E+02		2.05E+02		3.45	3.45E-03	-2.46E+00	2.31E+00	-8.46E+00
	298	5.15E-01												2.22E+02	2.47E+02	2.47E+02		3.36	3.36E-03	-2.47E+00	2.39E+00	2.10E+02
	310	1.25E+00												2.92E+02		3.24E+02		3.23	3.23E-03	-2.49E+00	2.51E+00	-1.92E+01
	320	2.49E+00												3.66E+02		4.04E+02		3.13	3.13E-03	-2.51E+00	2.61E+00	#N/A
	330	4.74E+00												4.54E+02		5.01E+02		3.03	3.03E-03	-2.52E+00	2.70E+00	#N/A
	340	8.71E+00												5.62E+02		6.18E+02		2.94	2.94E-03	-2.53E+00	2.79E+00	A	6.18E+02
	350	1.54E+01												6.91E+02		7.58E+02		2.86	2.86E-03	-2.54E+00	2.88E+00	5.64E-20	1.00
	375	5.66E+01												1.14E+03		1.24E+03		2.67	2.67E-03	-2.57E+00	3.09E+00	n
	400	1.76E+02												1.82E+03		1.97E+03		2.50	2.50E-03	-2.60E+00	3.30E+00	8.46
	425	4.81E+02												2.85E+03		3.07E+03		2.35	2.35E-03	-2.63E+00	3.49E+00	Ea	1.00
	450	1.17E+03												4.35E+03		4.67E+03		2.22	2.22E-03	-2.65E+00	3.67E+00	-484	4.67E+03
	P1	8780000000
	P2	7290														Ea shift
	P3															2.37E+02
>C(OO.)- | -CH2-	T	Miyoshi 2011	Praske 2019 (exp)	Praske 2019										T-dependence	Target	Final		1000/T	1/T	log(1/T)	log(>C(OO.)- | -CH2-)	log(T)	Replicate
	200	1.30E-06												1.60E+01		4.88E+00		5.00	5.00E-03	-2.30E+00	6.88E-01	A	2.87E+00
	225	7.45E-05												3.37E+01		1.17E+01		4.44	4.44E-03	-2.35E+00	1.07E+00	2.55E+05	0.59
	250	1.90E-03												6.72E+01		2.60E+01		4.00	4.00E-03	-2.40E+00	1.42E+00	Ea
	260	5.84E-03												8.74E+01		3.51E+01		3.85	3.85E-03	-2.41E+00	1.54E+00	2.28E+03
	270	1.65E-02												1.13E+02		4.68E+01		3.70	3.70E-03	-2.43E+00	1.67E+00		1.20
	280	4.33E-02												1.44E+02		6.19E+01		3.57	3.57E-03	-2.45E+00	1.79E+00		7.45E+01
	290	1.06E-01												1.84E+02		8.11E+01		3.45	3.45E-03	-2.46E+00	1.91E+00	-8.46E+00
	298	2.09E-01	1.00E+02	4.90E+03										2.22E+02	1.00E+02	1.00E+02		3.36	3.36E-03	-2.47E+00	2.00E+00	9.31E+01
	310	5.38E-01												2.92E+02		1.36E+02		3.23	3.23E-03	-2.49E+00	2.13E+00	-1.92E+01
	320	1.12E+00												3.66E+02		1.74E+02		3.13	3.13E-03	-2.51E+00	2.24E+00	#N/A
	330	2.24E+00												4.54E+02		2.21E+02		3.03	3.03E-03	-2.52E+00	2.35E+00	#N/A
	340	4.28E+00												5.62E+02		2.80E+02		2.94	2.94E-03	-2.53E+00	2.45E+00	A	2.80E+02
	350	7.90E+00												6.91E+02		3.51E+02		2.86	2.86E-03	-2.54E+00	2.55E+00	5.64E-20	1.00
	375	3.17E+01												1.14E+03		6.04E+02		2.67	2.67E-03	-2.57E+00	2.78E+00	n
	400	1.07E+02												1.82E+03		1.01E+03		2.50	2.50E-03	-2.60E+00	3.00E+00	8.46
	425	3.12E+02												2.85E+03		1.63E+03		2.35	2.35E-03	-2.63E+00	3.21E+00	Ea	1.00
	450	8.09E+02												4.35E+03		2.57E+03		2.22	2.22E-03	-2.65E+00	3.41E+00	-214	2.57E+03
	P1	8570000000
	P2	6310														Ea shift
	P3															-7.35E+02
>C(OO.)- | >CH-	T	Miyoshi 2011												T-dependence	Target	Final		1000/T	1/T	log(1/T)	log(>C(OO.)- | >CH-)	log(T)	Replicate
	200	1.70E-04												1.60E+01		6.32E+02		5.00	5.00E-03	-2.30E+00	2.80E+00	A	3.72E+02
	225	5.67E-03												3.37E+01		8.85E+02		4.44	4.44E-03	-2.35E+00	2.95E+00	2.55E+05	0.59
	250	9.36E-02												6.72E+01		1.27E+03		4.00	4.00E-03	-2.40E+00	3.10E+00	Ea
	260	2.47E-01												8.74E+01		1.48E+03		3.85	3.85E-03	-2.41E+00	3.17E+00	1.31E+03
	270	6.07E-01												1.13E+02		1.72E+03		3.70	3.70E-03	-2.43E+00	3.24E+00		1.20
	280	1.40E+00												1.44E+02		2.00E+03		3.57	3.57E-03	-2.45E+00	3.30E+00		2.40E+03
	290	3.04E+00												1.84E+02		2.32E+03		3.45	3.45E-03	-2.46E+00	3.37E+00	-8.46E+00
	298	5.46E+00												2.22E+02	2.62E+03	2.62E+03		3.36	3.36E-03	-2.47E+00	3.42E+00	5.16E+02
	310	1.24E+01												2.92E+02		3.14E+03		3.23	3.23E-03	-2.49E+00	3.50E+00	-1.92E+01
	320	2.34E+01												3.66E+02		3.64E+03		3.13	3.13E-03	-2.51E+00	3.56E+00	#N/A
	330	4.25E+01												4.54E+02		4.22E+03		3.03	3.03E-03	-2.52E+00	3.63E+00	#N/A
	340	7.46E+01												5.62E+02		4.89E+03		2.94	2.94E-03	-2.53E+00	3.69E+00	A	4.89E+03
	350	1.27E+02												6.91E+02		5.65E+03		2.86	2.86E-03	-2.54E+00	3.75E+00	5.64E-20	1.00
	375	4.22E+02												1.14E+03		8.08E+03		2.67	2.67E-03	-2.57E+00	3.91E+00	n
	400	1.21E+03												1.82E+03		1.15E+04		2.50	2.50E-03	-2.60E+00	4.06E+00	8.46
	425	3.05E+03												2.85E+03		1.61E+04		2.35	2.35E-03	-2.63E+00	4.21E+00	Ea	1.00
	450	6.97E+03												4.35E+03		2.23E+04		2.22	2.22E-03	-2.65E+00	4.35E+00	-1187	2.23E+04
														Scaling:	5.60E+03
1,7 Hshift
	P1	1.21E+09
	P2	7080														Ea shift
	P3															-1.14E+02
-CH2OO. | -CH3	T	Miyoshi 2011												T-dependence	Target	Final		1000/T	1/T	log(1/T)	log(-CH2OO. | -CH3)	log(T)	Replicate
	200	5.11E-07												1.60E+01		2.83E+01		5.00	5.00E-03	-2.30E+00	1.45E+00	A	1.67E+01
	225	2.61E-05												3.37E+01		5.59E+01		4.44	4.44E-03	-2.35E+00	1.75E+00	2.55E+05	0.59
	250	6.08E-04												6.72E+01		1.06E+02		4.00	4.00E-03	-2.40E+00	2.03E+00	Ea
	260	1.81E-03												8.74E+01		1.36E+02		3.85	3.85E-03	-2.41E+00	2.13E+00	1.93E+03
	270	4.95E-03												1.13E+02		1.72E+02		3.70	3.70E-03	-2.43E+00	2.24E+00		1.20
	280	1.26E-02												1.44E+02		2.17E+02		3.57	3.57E-03	-2.45E+00	2.34E+00		2.61E+02
	290	3.02E-02												1.84E+02		2.73E+02		3.45	3.45E-03	-2.46E+00	2.44E+00	-8.46E+00
	298	5.82E-02												2.22E+02	3.26E+02	3.26E+02		3.36	3.36E-03	-2.47E+00	2.51E+00	2.46E+02
	310	1.46E-01												2.92E+02		4.23E+02		3.23	3.23E-03	-2.49E+00	2.63E+00	-1.92E+01
	320	2.98E-01												3.66E+02		5.22E+02		3.13	3.13E-03	-2.51E+00	2.72E+00	#N/A
	330	5.82E-01												4.54E+02		6.42E+02		3.03	3.03E-03	-2.52E+00	2.81E+00	#N/A
	340	1.09E+00												5.62E+02		7.86E+02		2.94	2.94E-03	-2.53E+00	2.90E+00	A	7.86E+02
	350	1.98E+00												6.91E+02		9.58E+02		2.86	2.86E-03	-2.54E+00	2.98E+00	5.64E-20	1.00
	375	7.64E+00												1.14E+03		1.54E+03		2.67	2.67E-03	-2.57E+00	3.19E+00	n
	400	2.49E+01												1.82E+03		2.42E+03		2.50	2.50E-03	-2.60E+00	3.38E+00	8.46
	425	7.05E+01												2.85E+03		3.72E+03		2.35	2.35E-03	-2.63E+00	3.57E+00	Ea	1.00
	450	1.78E+02												4.35E+03		5.61E+03		2.22	2.22E-03	-2.65E+00	3.75E+00	-566	5.61E+03
	P0		1
	P1	3.22E+09	2.63E+00
	P2	6900	2.37													Ea shift
	P3		1.24E+01											average		-5.86E+02
-CH2OO. | -CH2-	T	Miyoshi 2011	Mohamed et al. 2018b											T-dependence	Target	Final		1000/T	1/T	log(1/T)	log(-CH2OO. | -CH2-)	log(T)	Replicate
	200	3.35E-06	1.11E-07											1.60E+01		2.99E+02		5.00	5.00E-03	-2.30E+00	2.48E+00	A	1.76E+02
	225	1.55E-04	4.69E-06											3.37E+01		4.55E+02		4.44	4.44E-03	-2.35E+00	2.66E+00	2.55E+05	0.59
	250	3.32E-03	9.65E-05											6.72E+01		7.00E+02		4.00	4.00E-03	-2.40E+00	2.85E+00	Ea
	260	9.60E-03	2.76E-04											8.74E+01		8.32E+02		3.85	3.85E-03	-2.41E+00	2.92E+00	1.46E+03
	270	2.57E-02	7.36E-04											1.13E+02		9.87E+02		3.70	3.70E-03	-2.43E+00	2.99E+00		1.20
	280	6.39E-02	1.83E-03											1.44E+02		1.17E+03		3.57	3.57E-03	-2.45E+00	3.07E+00		1.41E+03
	290	1.50E-01	4.29E-03											1.84E+02		1.39E+03		3.45	3.45E-03	-2.46E+00	3.14E+00	-8.46E+00
	298	2.83E-01	8.15E-03											2.22E+02	1.59E+03	1.59E+03		3.36	3.36E-03	-2.47E+00	3.20E+00	4.51E+02
	310	6.94E-01	2.01E-02											2.92E+02		1.94E+03		3.23	3.23E-03	-2.49E+00	3.29E+00	-1.92E+01
	320	1.39E+00	4.07E-02											3.66E+02		2.28E+03		3.13	3.13E-03	-2.51E+00	3.36E+00	#N/A
	330	2.67E+00	7.91E-02											4.54E+02		2.68E+03		3.03	3.03E-03	-2.52E+00	3.43E+00	#N/A
	340	4.95E+00	1.48E-01											5.62E+02		3.15E+03		2.94	2.94E-03	-2.53E+00	3.50E+00	A	3.15E+03
	350	8.83E+00	2.68E-01											6.91E+02		3.69E+03		2.86	2.86E-03	-2.54E+00	3.57E+00	5.64E-20	1.00
	375	3.29E+01	1.04E+00											1.14E+03		5.42E+03		2.67	2.67E-03	-2.57E+00	3.73E+00	n
	400	1.04E+02	3.42E+00											1.82E+03		7.88E+03		2.50	2.50E-03	-2.60E+00	3.90E+00	8.46
	425	2.86E+02	9.87E+00											2.85E+03		1.13E+04		2.35	2.35E-03	-2.63E+00	4.05E+00	Ea	1.00
	450	7.06E+02	2.56E+01											4.35E+03		1.60E+04		2.22	2.22E-03	-2.65E+00	4.20E+00	-1038	1.60E+04
	P1	1.95E+09
	P2	6400														Ea shift
	P3													average		-9.36E+02
-CH2OO. | >CH-	T	Miyoshi 2011												T-dependence	Target	Final		1000/T	1/T	log(1/T)	log(-CH2OO. | >CH-)	log(T)	Replicate
	200	2.47E-05												1.60E+01		1.73E+03		5.00	5.00E-03	-2.30E+00	3.24E+00	A	1.02E+03
	225	8.65E-04												3.37E+01		2.16E+03		4.44	4.44E-03	-2.35E+00	3.33E+00	2.55E+05	0.59
	250	1.49E-02												6.72E+01		2.84E+03		4.00	4.00E-03	-2.40E+00	3.45E+00	Ea
	260	3.98E-02												8.74E+01		3.20E+03		3.85	3.85E-03	-2.41E+00	3.51E+00	1.11E+03
	270	9.90E-02												1.13E+02		3.62E+03		3.70	3.70E-03	-2.43E+00	3.56E+00		1.20
	280	2.31E-01												1.44E+02		4.09E+03		3.57	3.57E-03	-2.45E+00	3.61E+00		4.93E+03
	290	5.08E-01												1.84E+02		4.64E+03		3.45	3.45E-03	-2.46E+00	3.67E+00	-8.46E+00
	298	9.18E-01												2.22E+02	5.14E+03	5.14E+03		3.36	3.36E-03	-2.47E+00	3.71E+00	6.03E+02
	310	2.11E+00												2.92E+02		6.00E+03		3.23	3.23E-03	-2.49E+00	3.78E+00	-1.92E+01
	320	4.02E+00												3.66E+02		6.82E+03		3.13	3.13E-03	-2.51E+00	3.83E+00	#N/A
	330	7.37E+00												4.54E+02		7.76E+03		3.03	3.03E-03	-2.52E+00	3.89E+00	#N/A
	340	1.30E+01												5.62E+02		8.83E+03		2.94	2.94E-03	-2.53E+00	3.95E+00	A	8.83E+03
	350	2.23E+01												6.91E+02		1.00E+04		2.86	2.86E-03	-2.54E+00	4.00E+00	5.64E-20	1.00
	375	7.55E+01												1.14E+03		1.38E+04		2.67	2.67E-03	-2.57E+00	4.14E+00	n
	400	2.19E+02												1.82E+03		1.89E+04		2.50	2.50E-03	-2.60E+00	4.28E+00	8.46
	425	5.62E+02												2.85E+03		2.58E+04		2.35	2.35E-03	-2.63E+00	4.41E+00	Ea	1.00
	450	1.30E+03												4.35E+03		3.49E+04		2.22	2.22E-03	-2.65E+00	4.54E+00	-1388	3.49E+04
	P1	2.85E+09
	P2	7150														Ea shift
	P3															-2.99E+02
>CHOO. | -CH3	T	Miyoshi 2011												T-dependence	Target	Final		1000/T	1/T	log(1/T)	log(>CHOO. | -CH3)	log(T)	Replicate
	200	8.49E-07												1.60E+01		7.14E+01		5.00	5.00E-03	-2.30E+00	1.85E+00	A	4.21E+01
	225	4.51E-05												3.37E+01		1.27E+02		4.44	4.44E-03	-2.35E+00	2.11E+00	2.55E+05	0.59
	250	1.08E-03												6.72E+01		2.23E+02		4.00	4.00E-03	-2.40E+00	2.35E+00	Ea
	260	3.25E-03												8.74E+01		2.76E+02		3.85	3.85E-03	-2.41E+00	2.44E+00	1.74E+03
	270	9.00E-03												1.13E+02		3.42E+02		3.70	3.70E-03	-2.43E+00	2.53E+00		1.20
	280	2.32E-02												1.44E+02		4.21E+02		3.57	3.57E-03	-2.45E+00	2.62E+00		5.07E+02
	290	5.59E-02												1.84E+02		5.17E+02		3.45	3.45E-03	-2.46E+00	2.71E+00	-8.46E+00
	298	1.08E-01												2.22E+02	6.07E+02	6.07E+02		3.36	3.36E-03	-2.47E+00	2.78E+00	3.26E+02
	310	2.74E-01												2.92E+02		7.68E+02		3.23	3.23E-03	-2.49E+00	2.89E+00	-1.92E+01
	320	5.64E-01												3.66E+02		9.32E+02		3.13	3.13E-03	-2.51E+00	2.97E+00	#N/A
	330	1.11E+00												4.54E+02		1.13E+03		3.03	3.03E-03	-2.52E+00	3.05E+00	#N/A
	340	2.10E+00												5.62E+02		1.36E+03		2.94	2.94E-03	-2.53E+00	3.13E+00	A	1.36E+03
	350	3.83E+00												6.91E+02		1.63E+03		2.86	2.86E-03	-2.54E+00	3.21E+00	5.64E-20	1.00
	375	1.49E+01												1.14E+03		2.53E+03		2.67	2.67E-03	-2.57E+00	3.40E+00	n
	400	4.92E+01												1.82E+03		3.85E+03		2.50	2.50E-03	-2.60E+00	3.59E+00	8.46
	425	1.41E+02												2.85E+03		5.76E+03		2.35	2.35E-03	-2.63E+00	3.76E+00	Ea	1.00
	450	3.58E+02												4.35E+03		8.47E+03		2.22	2.22E-03	-2.65E+00	3.93E+00	-751	8.47E+03
	P1	5540000000
	P2	6980														Ea shift
	P3													average		-6.68E+02
>CHOO. | -CH2-	T	Miyoshi 2011												T-dependence	Target	Final		1000/T	1/T	log(1/T)	log(>CHOO. | -CH2-)	log(T)	Replicate
	200	3.86E-06												1.60E+01		4.50E+02		5.00	5.00E-03	-2.30E+00	2.65E+00	A	2.65E+02
	225	1.87E-04												3.37E+01		6.54E+02		4.44	4.44E-03	-2.35E+00	2.82E+00	2.55E+05	0.59
	250	4.15E-03												6.72E+01		9.71E+02		4.00	4.00E-03	-2.40E+00	2.99E+00	Ea
	260	1.21E-02												8.74E+01		1.14E+03		3.85	3.85E-03	-2.41E+00	3.06E+00	1.37E+03
	270	3.28E-02												1.13E+02		1.34E+03		3.70	3.70E-03	-2.43E+00	3.13E+00		1.20
	280	8.26E-02												1.44E+02		1.57E+03		3.57	3.57E-03	-2.45E+00	3.20E+00		1.89E+03
	290	1.95E-01												1.84E+02		1.84E+03		3.45	3.45E-03	-2.46E+00	3.26E+00	-8.46E+00
	298	3.72E-01												2.22E+02	2.09E+03	2.09E+03		3.36	3.36E-03	-2.47E+00	3.32E+00	4.86E+02
	310	9.22E-01												2.92E+02		2.52E+03		3.23	3.23E-03	-2.49E+00	3.40E+00	-1.92E+01
	320	1.86E+00												3.66E+02		2.94E+03		3.13	3.13E-03	-2.51E+00	3.47E+00	#N/A
	330	3.61E+00												4.54E+02		3.44E+03		3.03	3.03E-03	-2.52E+00	3.54E+00	#N/A
	340	6.73E+00												5.62E+02		4.00E+03		2.94	2.94E-03	-2.53E+00	3.60E+00	A	4.00E+03
	350	1.21E+01												6.91E+02		4.66E+03		2.86	2.86E-03	-2.54E+00	3.67E+00	5.64E-20	1.00
	375	4.57E+01												1.14E+03		6.75E+03		2.67	2.67E-03	-2.57E+00	3.83E+00	n
	400	1.46E+02												1.82E+03		9.66E+03		2.50	2.50E-03	-2.60E+00	3.99E+00	8.46
	425	4.08E+02												2.85E+03		1.37E+04		2.35	2.35E-03	-2.63E+00	4.14E+00	Ea	1.00
	450	1.02E+03												4.35E+03		1.92E+04		2.22	2.22E-03	-2.65E+00	4.28E+00	-1119	1.92E+04
	P1	5090000000
	P2	6490														Ea shift
	P3													average		-1.13E+03
>CHOO. | >CH-	T	Miyoshi 2011	Praske et al. 2019 (exp)	Praske et al. 2019										T-dependence	Target	Final		1000/T	1/T	log(1/T)	log(>CHOO. | >CH-)	log(T)	Replicate
	200	4.11E-05												1.60E+01		4.59E+03		5.00	5.00E-03	-2.30E+00	3.66E+00	A	2.71E+03
	225	1.51E-03												3.37E+01		5.16E+03		4.44	4.44E-03	-2.35E+00	3.71E+00	2.55E+05	0.59
	250	2.71E-02												6.72E+01		6.23E+03		4.00	4.00E-03	-2.40E+00	3.79E+00	Ea
	260	7.35E-02												8.74E+01		6.80E+03		3.85	3.85E-03	-2.41E+00	3.83E+00	9.10E+02
	270	1.85E-01												1.13E+02		7.47E+03		3.70	3.70E-03	-2.43E+00	3.87E+00		1.20
	280	4.37E-01												1.44E+02		8.24E+03		3.57	3.57E-03	-2.45E+00	3.92E+00		9.92E+03
	290	9.72E-01												1.84E+02		9.13E+03		3.45	3.45E-03	-2.46E+00	3.96E+00	-8.46E+00
	298	1.77E+00	1.00E+04	1.20E+06										2.22E+02	9.92E+03	9.92E+03		3.36	3.36E-03	-2.47E+00	4.00E+00	6.88E+02
	310	4.12E+00												2.92E+02		1.13E+04		3.23	3.23E-03	-2.49E+00	4.05E+00	-1.92E+01
	320	7.92E+00												3.66E+02		1.26E+04		3.13	3.13E-03	-2.51E+00	4.10E+00	#N/A
	330	1.46E+01												4.54E+02		1.40E+04		3.03	3.03E-03	-2.52E+00	4.15E+00	#N/A
	340	2.61E+01												5.62E+02		1.57E+04		2.94	2.94E-03	-2.53E+00	4.20E+00	A	1.57E+04
	350	4.50E+01												6.91E+02		1.76E+04		2.86	2.86E-03	-2.54E+00	4.24E+00	5.64E-20	1.00
	375	1.55E+02												1.14E+03		2.33E+04		2.67	2.67E-03	-2.57E+00	4.37E+00	n
	400	4.57E+02												1.82E+03		3.09E+04		2.50	2.50E-03	-2.60E+00	4.49E+00	8.46
	425	1.19E+03												2.85E+03		4.09E+04		2.35	2.35E-03	-2.63E+00	4.61E+00	Ea	1.00
	450	2.77E+03												4.35E+03		5.39E+04		2.22	2.22E-03	-2.65E+00	4.73E+00	-1584	5.39E+04
	P1	1210000000
	P2	6520														Ea shift
	P3															-6.74E+02
>C(OO.)- | -CH3	T	Miyoshi 2011												T-dependence	Target	Final		1000/T	1/T	log(1/T)	log(>C(OO.)- | -CH3)	log(T)	Replicate
	200	8.41E-06												1.60E+01		4.65E+02		5.00	5.00E-03	-2.30E+00	2.67E+00	A	2.74E+02
	225	3.15E-04												3.37E+01		6.74E+02		4.44	4.44E-03	-2.35E+00	2.83E+00	2.55E+05	0.59
	250	5.71E-03												6.72E+01		9.97E+02		4.00	4.00E-03	-2.40E+00	3.00E+00	Ea
	260	1.56E-02												8.74E+01		1.17E+03		3.85	3.85E-03	-2.41E+00	3.07E+00	1.37E+03
	270	3.94E-02												1.13E+02		1.37E+03		3.70	3.70E-03	-2.43E+00	3.14E+00		1.20
	280	9.33E-02												1.44E+02		1.60E+03		3.57	3.57E-03	-2.45E+00	3.21E+00		1.93E+03
	290	2.08E-01												1.84E+02		1.88E+03		3.45	3.45E-03	-2.46E+00	3.27E+00	-8.46E+00
	298	3.81E-01												2.22E+02	2.13E+03	2.13E+03		3.36	3.36E-03	-2.47E+00	3.33E+00	4.89E+02
	310	8.88E-01												2.92E+02		2.57E+03		3.23	3.23E-03	-2.49E+00	3.41E+00	-1.92E+01
	320	1.71E+00												3.66E+02		3.01E+03		3.13	3.13E-03	-2.51E+00	3.48E+00	#N/A
	330	3.18E+00												4.54E+02		3.51E+03		3.03	3.03E-03	-2.52E+00	3.54E+00	#N/A
	340	5.68E+00												5.62E+02		4.08E+03		2.94	2.94E-03	-2.53E+00	3.61E+00	A	4.08E+03
	350	9.83E+00												6.91E+02		4.75E+03		2.86	2.86E-03	-2.54E+00	3.68E+00	5.64E-20	1.00
	375	3.40E+01												1.14E+03		6.87E+03		2.67	2.67E-03	-2.57E+00	3.84E+00	n
	400	1.01E+02												1.82E+03		9.83E+03		2.50	2.50E-03	-2.60E+00	3.99E+00	8.46
	425	2.63E+02												2.85E+03		1.39E+04		2.35	2.35E-03	-2.63E+00	4.14E+00	Ea	1.00
	450	6.17E+02												4.35E+03		1.95E+04		2.22	2.22E-03	-2.65E+00	4.29E+00	-1126	1.95E+04
	P1	3470000000
	P2	6330														Ea shift
	P3													average		-1.18E+03
>C(OO.)- | -CH2-	T	Miyoshi 2011	Praske et al. 2019											T-dependence	Target	Final		1000/T	1/T	log(1/T)	log(>C(OO.)- | -CH2-)	log(T)	Replicate
	200	6.24E-05												1.60E+01		5.78E+03		5.00	5.00E-03	-2.30E+00	3.76E+00	A	3.40E+03
	225	2.10E-03												3.37E+01		6.33E+03		4.44	4.44E-03	-2.35E+00	3.80E+00	2.55E+05	0.59
	250	3.50E-02												6.72E+01		7.48E+03		4.00	4.00E-03	-2.40E+00	3.87E+00	Ea
	260	9.27E-02												8.74E+01		8.11E+03		3.85	3.85E-03	-2.41E+00	3.91E+00	8.64E+02
	270	2.28E-01												1.13E+02		8.85E+03		3.70	3.70E-03	-2.43E+00	3.95E+00		1.20
	280	5.27E-01												1.44E+02		9.71E+03		3.57	3.57E-03	-2.45E+00	3.99E+00		1.17E+04
	290	1.15E+00												1.84E+02		1.07E+04		3.45	3.45E-03	-2.46E+00	4.03E+00	-8.46E+00
	298	2.07E+00	6.00E+05											2.22E+02	1.16E+04	1.16E+04		3.36	3.36E-03	-2.47E+00	4.06E+00	7.08E+02
	310	4.70E+00												2.92E+02		1.31E+04		3.23	3.23E-03	-2.49E+00	4.12E+00	-1.92E+01
	320	8.90E+00												3.66E+02		1.45E+04		3.13	3.13E-03	-2.51E+00	4.16E+00	#N/A
	330	1.62E+01												4.54E+02		1.61E+04		3.03	3.03E-03	-2.52E+00	4.21E+00	#N/A
	340	2.85E+01												5.62E+02		1.80E+04		2.94	2.94E-03	-2.53E+00	4.25E+00	A	1.80E+04
	350	4.85E+01												6.91E+02		2.00E+04		2.86	2.86E-03	-2.54E+00	4.30E+00	5.64E-20	1.00
	375	1.62E+02												1.14E+03		2.63E+04		2.67	2.67E-03	-2.57E+00	4.42E+00	n
	400	4.65E+02												1.82E+03		3.46E+04		2.50	2.50E-03	-2.60E+00	4.54E+00	8.46
	425	1.18E+03												2.85E+03		4.55E+04		2.35	2.35E-03	-2.63E+00	4.66E+00	Ea	1.00
	450	2.70E+03												4.35E+03		5.97E+04		2.22	2.22E-03	-2.65E+00	4.78E+00	-1630	5.97E+04
	P1	3560000000
	P2	7140														Ea shift
	P3													average		-3.76E+02
>C(OO.)- | >CH-	T	Miyoshi 2011												T-dependence	Target	Final		1000/T	1/T	log(1/T)	log(>C(OO.)- | >CH-)	log(T)	Replicate
	200	1.11E-06												1.60E+01		1.05E+02		5.00	5.00E-03	-2.30E+00	2.02E+00	A	6.16E+01
	225	5.89E-05												3.37E+01		1.79E+02		4.44	4.44E-03	-2.35E+00	2.25E+00	2.55E+05	0.59
	250	1.41E-03												6.72E+01		3.02E+02		4.00	4.00E-03	-2.40E+00	2.48E+00	Ea
	260	4.22E-03												8.74E+01		3.71E+02		3.85	3.85E-03	-2.41E+00	2.57E+00	1.67E+03
	270	1.17E-02												1.13E+02		4.53E+02		3.70	3.70E-03	-2.43E+00	2.66E+00		1.20
	280	3.00E-02												1.44E+02		5.53E+02		3.57	3.57E-03	-2.45E+00	2.74E+00		6.65E+02
	290	7.22E-02												1.84E+02		6.72E+02		3.45	3.45E-03	-2.46E+00	2.83E+00	-8.46E+00
	298	1.40E-01												2.22E+02	7.84E+02	7.84E+02		3.36	3.36E-03	-2.47E+00	2.89E+00	3.59E+02
	310	3.54E-01												2.92E+02		9.83E+02		3.23	3.23E-03	-2.49E+00	2.99E+00	-1.92E+01
	320	7.27E-01												3.66E+02		1.18E+03		3.13	3.13E-03	-2.51E+00	3.07E+00	#N/A
	330	1.43E+00												4.54E+02		1.42E+03		3.03	3.03E-03	-2.52E+00	3.15E+00	#N/A
	340	2.70E+00												5.62E+02		1.70E+03		2.94	2.94E-03	-2.53E+00	3.23E+00	A	1.70E+03
	350	4.92E+00												6.91E+02		2.02E+03		2.86	2.86E-03	-2.54E+00	3.31E+00	5.64E-20	1.00
	375	1.92E+01												1.14E+03		3.10E+03		2.67	2.67E-03	-2.57E+00	3.49E+00	n
	400	6.30E+01												1.82E+03		4.66E+03		2.50	2.50E-03	-2.60E+00	3.67E+00	8.46
	425	1.80E+02												2.85E+03		6.89E+03		2.35	2.35E-03	-2.63E+00	3.84E+00	Ea	1.00
	450	4.58E+02												4.35E+03		1.00E+04		2.22	2.22E-03	-2.65E+00	4.00E+00	-827	1.00E+04
														Scaling:	1.60E+05
1,8 Hshift
	P1	9.04E+07
	P2	7.79E+03														Ea shift
	P3															3.70E+02
-CH2OO. | -CH3	T	Miyoshi 2011												T-dependence	Target	Final		1000/T	1/T	log(1/T)	log(-CH2OO. | -CH3)	log(T)	Replicate
	200	1.10E-09												1.60E+01		2.51E+00		5.00	5.00E-03	-2.30E+00	4.00E-01	A	1.48E+00
	225	8.32E-08												3.37E+01		6.51E+00		4.44	4.44E-03	-2.35E+00	8.13E-01	2.55E+05	0.59
	250	2.65E-06												6.72E+01		1.53E+01		4.00	4.00E-03	-2.40E+00	1.18E+00	Ea
	260	8.79E-06												8.74E+01		2.11E+01		3.85	3.85E-03	-2.41E+00	1.32E+00	2.41E+03
	270	2.67E-05												1.13E+02		2.87E+01		3.70	3.70E-03	-2.43E+00	1.46E+00		1.20
	280	7.47E-05												1.44E+02		3.86E+01		3.57	3.57E-03	-2.45E+00	1.59E+00		4.64E+01
	290	1.95E-04												1.84E+02		5.14E+01		3.45	3.45E-03	-2.46E+00	1.71E+00	-8.46E+00
	298	4.01E-04												2.22E+02	6.42E+01	6.42E+01		3.36	3.36E-03	-2.47E+00	1.81E+00	3.55E+01
	310	1.10E-03												2.92E+02		8.87E+01		3.23	3.23E-03	-2.49E+00	1.95E+00	-1.92E+01
	320	2.42E-03												3.66E+02		1.15E+02		3.13	3.13E-03	-2.51E+00	2.06E+00	#N/A
	330	5.06E-03												4.54E+02		1.48E+02		3.03	3.03E-03	-2.52E+00	2.17E+00	#N/A
	340	1.01E-02												5.62E+02		1.89E+02		2.94	2.94E-03	-2.53E+00	2.28E+00	A	1.89E+02
	350	1.95E-02												6.91E+02		2.40E+02		2.86	2.86E-03	-2.54E+00	2.38E+00	5.64E-20	1.00
	375	8.60E-02												1.14E+03		4.24E+02		2.67	2.67E-03	-2.57E+00	2.63E+00	n
	400	3.15E-01												1.82E+03		7.22E+02		2.50	2.50E-03	-2.60E+00	2.86E+00	8.46
	425	9.90E-01												2.85E+03		1.19E+03		2.35	2.35E-03	-2.63E+00	3.08E+00	Ea	1.00
	450	2.74E+00												4.35E+03		1.91E+03		2.22	2.22E-03	-2.65E+00	3.28E+00	-82	1.91E+03
	P1	4.22E+08	3.48E-25
	P2	7.47E+03	1.02E+01													Ea shift
	P3		-1326.66520045231													0.00E+00
-CH2OO. | -CH2-	T	Miyoshi 2011	Nozière and Vereecken 2019											T-dependence	Target	Final		1000/T	1/T	log(1/T)	log(-CH2OO. | -CH2-)	log(T)	Replicate
	200	2.54E-08	6.43E+01											6.43E+01		6.43E+01		5.00	5.00E-03	-2.30E+00	1.81E+00	A	3.40E+01
	225	1.61E-06	1.02E+02											1.02E+02		1.02E+02		4.44	4.44E-03	-2.35E+00	2.01E+00	1.43E+05	0.53
	250	4.45E-05	1.65E+02											1.65E+02		1.65E+02		4.00	4.00E-03	-2.40E+00	2.22E+00	Ea
	260	1.41E-04	2.00E+02											2.00E+02		2.00E+02		3.85	3.85E-03	-2.41E+00	2.30E+00	1.67E+03
	270	4.07E-04	2.43E+02											2.43E+02		2.43E+02		3.70	3.70E-03	-2.43E+00	2.39E+00		1.25
	280	1.09E-03	2.95E+02											2.95E+02		2.95E+02		3.57	3.57E-03	-2.45E+00	2.47E+00		3.69E+02
	290	2.74E-03	3.58E+02											3.58E+02		3.58E+02		3.45	3.45E-03	-2.46E+00	2.55E+00	-1.02E+01
	298	5.48E-03	4.17E+02											4.17E+02	4.17E+02	4.17E+02		3.36	3.36E-03	-2.47E+00	2.62E+00	5.76E+02
	310	1.45E-02	5.25E+02											5.25E+02		5.25E+02		3.23	3.23E-03	-2.49E+00	2.72E+00	-2.45E+01
	320	3.07E-02	6.34E+02											6.34E+02		6.34E+02		3.13	3.13E-03	-2.51E+00	2.80E+00	#N/A
	330	6.23E-02	7.64E+02											7.64E+02		7.64E+02		3.03	3.03E-03	-2.52E+00	2.88E+00	#N/A
	340	1.21E-01	9.20E+02											9.20E+02		9.20E+02		2.94	2.94E-03	-2.53E+00	2.96E+00	A	9.20E+02
	350	2.27E-01	1.10E+03											1.10E+03		1.10E+03		2.86	2.86E-03	-2.54E+00	3.04E+00	3.48E-25	1.00
	375	9.42E-01	1.73E+03											1.73E+03		1.73E+03		2.67	2.67E-03	-2.57E+00	3.24E+00	n
	400	3.27E+00	2.67E+03											2.67E+03		2.67E+03		2.50	2.50E-03	-2.60E+00	3.43E+00	10.16
	425	9.82E+00	4.07E+03											4.07E+03		4.07E+03		2.35	2.35E-03	-2.63E+00	3.61E+00	Ea	1.00
	450	2.61E+01	6.12E+03											6.12E+03		6.12E+03		2.22	2.22E-03	-2.65E+00	3.79E+00	-1327	6.12E+03
	P1	1.75E+08
	P2	7.58E+03														Ea shift
	P3															-3.70E+01
-CH2OO. | >CH-	T	Miyoshi 2011												T-dependence	Target	Final		1000/T	1/T	log(1/T)	log(-CH2OO. | >CH-)	log(T)	Replicate
	200	6.07E-09												1.60E+01		1.92E+01		5.00	5.00E-03	-2.30E+00	1.28E+00	A	1.13E+01
	225	4.09E-07												3.37E+01		3.97E+01		4.44	4.44E-03	-2.35E+00	1.60E+00	2.55E+05	0.59
	250	1.19E-05												6.72E+01		7.79E+01		4.00	4.00E-03	-2.40E+00	1.89E+00	Ea
	260	3.82E-05												8.74E+01		1.01E+02		3.85	3.85E-03	-2.41E+00	2.00E+00	2.00E+03
	270	1.12E-04												1.13E+02		1.29E+02		3.70	3.70E-03	-2.43E+00	2.11E+00		1.20
	280	3.06E-04												1.44E+02		1.65E+02		3.57	3.57E-03	-2.45E+00	2.22E+00		1.98E+02
	290	7.79E-04												1.84E+02		2.09E+02		3.45	3.45E-03	-2.46E+00	2.32E+00	-8.46E+00
	298	1.57E-03												2.22E+02	2.51E+02	2.51E+02		3.36	3.36E-03	-2.47E+00	2.40E+00	2.12E+02
	310	4.21E-03												2.92E+02		3.29E+02		3.23	3.23E-03	-2.49E+00	2.52E+00	-1.92E+01
	320	9.03E-03												3.66E+02		4.10E+02		3.13	3.13E-03	-2.51E+00	2.61E+00	#N/A
	330	1.85E-02												4.54E+02		5.08E+02		3.03	3.03E-03	-2.52E+00	2.71E+00	#N/A
	340	3.64E-02												5.62E+02		6.26E+02		2.94	2.94E-03	-2.53E+00	2.80E+00	A	6.26E+02
	350	6.88E-02												6.91E+02		7.68E+02		2.86	2.86E-03	-2.54E+00	2.89E+00	5.64E-20	1.00
	375	2.91E-01												1.14E+03		1.26E+03		2.67	2.67E-03	-2.57E+00	3.10E+00	n
	400	1.03E+00												1.82E+03		2.00E+03		2.50	2.50E-03	-2.60E+00	3.30E+00	8.46
	425	3.14E+00												2.85E+03		3.11E+03		2.35	2.35E-03	-2.63E+00	3.49E+00	Ea	1.00
	450	8.46E+00												4.35E+03		4.73E+03		2.22	2.22E-03	-2.65E+00	3.67E+00	-489	4.73E+03
	P1	234000000	9.14E-15
	P2	8010	6.76E+00													Ea shift
	P3		423.343951208445													0.00E+00
>CHOO. | -CH3	T	Miyoshi 2011	Nozière and Vereecken 2019											T-dependence	Target	Final		1000/T	1/T	log(1/T)	log(>CHOO. | -CH3)	log(T)	Replicate
	200	9.46E-10	3.97E+00											3.97E+00		3.97E+00		5.00	5.00E-03	-2.30E+00	5.99E-01	A	2.60E+00
	225	8.10E-08	1.11E+01											1.11E+01		1.11E+01		4.44	4.44E-03	-2.35E+00	1.05E+00	4.58E+05	0.65
	250	2.85E-06	2.74E+01											2.74E+01		2.74E+01		4.00	4.00E-03	-2.40E+00	1.44E+00	Ea
	260	9.76E-06	3.82E+01											3.82E+01		3.82E+01		3.85	3.85E-03	-2.41E+00	1.58E+00	2.42E+03
	270	3.06E-05	5.23E+01											5.23E+01		5.23E+01		3.70	3.70E-03	-2.43E+00	1.72E+00		1.16
	280	8.82E-05	7.07E+01											7.07E+01		7.07E+01		3.57	3.57E-03	-2.45E+00	1.85E+00		8.20E+01
	290	2.36E-04	9.45E+01											9.45E+01		9.45E+01		3.45	3.45E-03	-2.46E+00	1.98E+00	-6.76E+00
	298	4.96E-04	1.18E+02											1.18E+02	1.18E+02	1.18E+02		3.36	3.36E-03	-2.47E+00	2.07E+00	-1.84E+02
	310	1.40E-03	1.63E+02											1.63E+02		1.63E+02		3.23	3.23E-03	-2.49E+00	2.21E+00	-1.40E+01
	320	3.15E-03	2.11E+02											2.11E+02		2.11E+02		3.13	3.13E-03	-2.51E+00	2.32E+00	#N/A
	330	6.73E-03	2.70E+02											2.70E+02		2.70E+02		3.03	3.03E-03	-2.52E+00	2.43E+00	#N/A
	340	1.37E-02	3.43E+02											3.43E+02		3.43E+02		2.94	2.94E-03	-2.53E+00	2.54E+00	A	3.43E+02
	350	2.69E-02	4.33E+02											4.33E+02		4.33E+02		2.86	2.86E-03	-2.54E+00	2.64E+00	9.14E-15	1.00
	375	1.24E-01	7.48E+02											7.48E+02		7.48E+02		2.67	2.67E-03	-2.57E+00	2.87E+00	n
	400	4.70E-01	1.24E+03											1.24E+03		1.24E+03		2.50	2.50E-03	-2.60E+00	3.09E+00	6.76
	425	1.53E+00	1.99E+03											1.99E+03		1.99E+03		2.35	2.35E-03	-2.63E+00	3.30E+00	Ea	1.00
	450	4.35E+00	3.10E+03											3.10E+03		3.10E+03		2.22	2.22E-03	-2.65E+00	3.49E+00	423	3.10E+03
	P1	274000000
	P2	7720														Ea shift
	P3															-3.06E+01
>CHOO. | -CH2-	T	Miyoshi 2011												T-dependence	Target	Final		1000/T	1/T	log(1/T)	log(>CHOO. | -CH2-)	log(T)	Replicate
	200	4.72E-09												1.60E+01		1.86E+01		5.00	5.00E-03	-2.30E+00	1.27E+00	A	1.10E+01
	225	3.44E-07												3.37E+01		3.86E+01		4.44	4.44E-03	-2.35E+00	1.59E+00	2.55E+05	0.59
	250	1.06E-05												6.72E+01		7.59E+01		4.00	4.00E-03	-2.40E+00	1.88E+00	Ea
	260	3.49E-05												8.74E+01		9.83E+01		3.85	3.85E-03	-2.41E+00	1.99E+00	2.01E+03
	270	1.05E-04												1.13E+02		1.26E+02		3.70	3.70E-03	-2.43E+00	2.10E+00		1.20
	280	2.91E-04												1.44E+02		1.61E+02		3.57	3.57E-03	-2.45E+00	2.21E+00		1.94E+02
	290	7.53E-04												1.84E+02		2.04E+02		3.45	3.45E-03	-2.46E+00	2.31E+00	-8.46E+00
	298	1.54E-03												2.22E+02	2.46E+02	2.46E+02		3.36	3.36E-03	-2.47E+00	2.39E+00	2.09E+02
	310	4.19E-03												2.92E+02		3.23E+02		3.23	3.23E-03	-2.49E+00	2.51E+00	-1.92E+01
	320	9.13E-03												3.66E+02		4.02E+02		3.13	3.13E-03	-2.51E+00	2.60E+00	#N/A
	330	1.90E-02												4.54E+02		4.99E+02		3.03	3.03E-03	-2.52E+00	2.70E+00	#N/A
	340	3.77E-02												5.62E+02		6.15E+02		2.94	2.94E-03	-2.53E+00	2.79E+00	A	6.15E+02
	350	7.22E-02												6.91E+02		7.55E+02		2.86	2.86E-03	-2.54E+00	2.88E+00	5.64E-20	1.00
	375	3.14E-01												1.14E+03		1.23E+03		2.67	2.67E-03	-2.57E+00	3.09E+00	n
	400	1.14E+00												1.82E+03		1.97E+03		2.50	2.50E-03	-2.60E+00	3.29E+00	8.46
	425	3.54E+00												2.85E+03		3.06E+03		2.35	2.35E-03	-2.63E+00	3.49E+00	Ea	1.00
	450	9.71E+00												4.35E+03		4.66E+03		2.22	2.22E-03	-2.65E+00	3.67E+00	-482	4.66E+03
	P1	170000000
	P2	7710														Ea shift
	P3															1.02E+02
>CHOO. | >CH-	T	Miyoshi 2011												T-dependence	Target	Final		1000/T	1/T	log(1/T)	log(>CHOO. | >CH-)	log(T)	Replicate
	200	3.08E-09												1.60E+01		9.61E+00		5.00	5.00E-03	-2.30E+00	9.83E-01	A	5.66E+00
	225	2.23E-07												3.37E+01		2.14E+01		4.44	4.44E-03	-2.35E+00	1.33E+00	2.55E+05	0.59
	250	6.87E-06												6.72E+01		4.47E+01		4.00	4.00E-03	-2.40E+00	1.65E+00	Ea
	260	2.25E-05												8.74E+01		5.91E+01		3.85	3.85E-03	-2.41E+00	1.77E+00	2.14E+03
	270	6.74E-05												1.13E+02		7.74E+01		3.70	3.70E-03	-2.43E+00	1.89E+00		1.20
	280	1.87E-04												1.44E+02		1.00E+02		3.57	3.57E-03	-2.45E+00	2.00E+00		1.21E+02
	290	4.83E-04												1.84E+02		1.30E+02		3.45	3.45E-03	-2.46E+00	2.11E+00	-8.46E+00
	298	9.87E-04												2.22E+02	1.58E+02	1.58E+02		3.36	3.36E-03	-2.47E+00	2.20E+00	1.52E+02
	310	2.69E-03												2.92E+02		2.11E+02		3.23	3.23E-03	-2.49E+00	2.32E+00	-1.92E+01
	320	5.84E-03												3.66E+02		2.66E+02		3.13	3.13E-03	-2.51E+00	2.42E+00	#N/A
	330	1.21E-02												4.54E+02		3.34E+02		3.03	3.03E-03	-2.52E+00	2.52E+00	#N/A
	340	2.41E-02												5.62E+02		4.17E+02		2.94	2.94E-03	-2.53E+00	2.62E+00	A	4.17E+02
	350	4.61E-02												6.91E+02		5.17E+02		2.86	2.86E-03	-2.54E+00	2.71E+00	5.64E-20	1.00
	375	2.00E-01												1.14E+03		8.67E+02		2.67	2.67E-03	-2.57E+00	2.94E+00	n
	400	7.23E-01												1.82E+03		1.41E+03		2.50	2.50E-03	-2.60E+00	3.15E+00	8.46
	425	2.25E+00												2.85E+03		2.24E+03		2.35	2.35E-03	-2.63E+00	3.35E+00	Ea	1.00
	450	6.16E+00												4.35E+03		3.47E+03		2.22	2.22E-03	-2.65E+00	3.54E+00	-350	3.47E+03
	P1	169000000
	P2	7650														Ea shift
	P3															4.34E+01
>C(OO.)- | -CH3	T	Miyoshi 2011												T-dependence	Target	Final		1000/T	1/T	log(1/T)	log(>C(OO.)- | -CH3)	log(T)	Replicate
	200	4.13E-09												1.60E+01		1.29E+01		5.00	5.00E-03	-2.30E+00	1.11E+00	A	7.57E+00
	225	2.90E-07												3.37E+01		2.78E+01		4.44	4.44E-03	-2.35E+00	1.44E+00	2.55E+05	0.59
	250	8.68E-06												6.72E+01		5.65E+01		4.00	4.00E-03	-2.40E+00	1.75E+00	Ea
	260	2.82E-05												8.74E+01		7.39E+01		3.85	3.85E-03	-2.41E+00	1.87E+00	2.09E+03
	270	8.37E-05												1.13E+02		9.60E+01		3.70	3.70E-03	-2.43E+00	1.98E+00		1.20
	280	2.30E-04												1.44E+02		1.24E+02		3.57	3.57E-03	-2.45E+00	2.09E+00		1.49E+02
	290	5.91E-04												1.84E+02		1.58E+02		3.45	3.45E-03	-2.46E+00	2.20E+00	-8.46E+00
	298	1.20E-03												2.22E+02	1.92E+02	1.92E+02		3.36	3.36E-03	-2.47E+00	2.28E+00	1.77E+02
	310	3.24E-03												2.92E+02		2.54E+02		3.23	3.23E-03	-2.49E+00	2.41E+00	-1.92E+01
	320	7.01E-03												3.66E+02		3.19E+02		3.13	3.13E-03	-2.51E+00	2.50E+00	#N/A
	330	1.45E-02												4.54E+02		3.98E+02		3.03	3.03E-03	-2.52E+00	2.60E+00	#N/A
	340	2.86E-02												5.62E+02		4.95E+02		2.94	2.94E-03	-2.53E+00	2.69E+00	A	4.95E+02
	350	5.44E-02												6.91E+02		6.11E+02		2.86	2.86E-03	-2.54E+00	2.79E+00	5.64E-20	1.00
	375	2.33E-01												1.14E+03		1.01E+03		2.67	2.67E-03	-2.57E+00	3.01E+00	n
	400	8.36E-01												1.82E+03		1.63E+03		2.50	2.50E-03	-2.60E+00	3.21E+00	8.46
	425	2.57E+00												2.85E+03		2.57E+03		2.35	2.35E-03	-2.63E+00	3.41E+00	Ea	1.00
	450	7.00E+00												4.35E+03		3.95E+03		2.22	2.22E-03	-2.65E+00	3.60E+00	-408	3.95E+03
	P1	395000000
	P2	7320														Ea shift
	P3															-5.40E+02
>C(OO.)- | -CH2-	T	Miyoshi 2011												T-dependence	Target	Final		1000/T	1/T	log(1/T)	log(>C(OO.)- | -CH2-)	log(T)	Replicate
	200	5.03E-08												1.60E+01		2.37E+02		5.00	5.00E-03	-2.30E+00	2.38E+00	A	1.40E+02
	225	2.93E-06												3.37E+01		3.71E+02		4.44	4.44E-03	-2.35E+00	2.57E+00	2.55E+05	0.59
	250	7.59E-05												6.72E+01		5.82E+02		4.00	4.00E-03	-2.40E+00	2.76E+00	Ea
	260	2.34E-04												8.74E+01		6.96E+02		3.85	3.85E-03	-2.41E+00	2.84E+00	1.50E+03
	270	6.64E-04												1.13E+02		8.32E+02		3.70	3.70E-03	-2.43E+00	2.92E+00		1.20
	280	1.75E-03												1.44E+02		9.92E+02		3.57	3.57E-03	-2.45E+00	3.00E+00		1.19E+03
	290	4.31E-03												1.84E+02		1.18E+03		3.45	3.45E-03	-2.46E+00	3.07E+00	-8.46E+00
	298	8.49E-03												2.22E+02	1.36E+03	1.36E+03		3.36	3.36E-03	-2.47E+00	3.13E+00	4.30E+02
	310	2.20E-02												2.92E+02		1.67E+03		3.23	3.23E-03	-2.49E+00	3.22E+00	-1.92E+01
	320	4.59E-02												3.66E+02		1.97E+03		3.13	3.13E-03	-2.51E+00	3.30E+00	#N/A
	330	9.19E-02												4.54E+02		2.33E+03		3.03	3.03E-03	-2.52E+00	3.37E+00	#N/A
	340	1.76E-01												5.62E+02		2.75E+03		2.94	2.94E-03	-2.53E+00	3.44E+00	A	2.75E+03
	350	3.26E-01												6.91E+02		3.23E+03		2.86	2.86E-03	-2.54E+00	3.51E+00	5.64E-20	1.00
	375	1.32E+00												1.14E+03		4.80E+03		2.67	2.67E-03	-2.57E+00	3.68E+00	n
	400	4.46E+00												1.82E+03		7.02E+03		2.50	2.50E-03	-2.60E+00	3.85E+00	8.46
	425	1.31E+01												2.85E+03		1.01E+04		2.35	2.35E-03	-2.63E+00	4.01E+00	Ea	1.00
	450	3.40E+01												4.35E+03		1.44E+04		2.22	2.22E-03	-2.65E+00	4.16E+00	-991	1.44E+04
	P1	70000000
	P2	7340														Ea shift
	P3															-3.94E+00
>C(OO.)- | >CH-	T	Miyoshi 2011												T-dependence	Target	Final		1000/T	1/T	log(1/T)	log(>C(OO.)- | >CH-)	log(T)	Replicate
	200	8.06E-09												1.60E+01		1.63E+01		5.00	5.00E-03	-2.30E+00	1.21E+00	A	9.59E+00
	225	4.76E-07												3.37E+01		3.43E+01		4.44	4.44E-03	-2.35E+00	1.53E+00	2.55E+05	0.59
	250	1.24E-05												6.72E+01		6.83E+01		4.00	4.00E-03	-2.40E+00	1.83E+00	Ea
	260	3.84E-05												8.74E+01		8.87E+01		3.85	3.85E-03	-2.41E+00	1.95E+00	2.04E+03
	270	1.09E-04												1.13E+02		1.14E+02		3.70	3.70E-03	-2.43E+00	2.06E+00		1.20
	280	2.89E-04												1.44E+02		1.47E+02		3.57	3.57E-03	-2.45E+00	2.17E+00		1.76E+02
	290	7.13E-04												1.84E+02		1.86E+02		3.45	3.45E-03	-2.46E+00	2.27E+00	-8.46E+00
	298	1.41E-03												2.22E+02	2.25E+02	2.25E+02		3.36	3.36E-03	-2.47E+00	2.35E+00	1.98E+02
	310	3.65E-03												2.92E+02		2.96E+02		3.23	3.23E-03	-2.49E+00	2.47E+00	-1.92E+01
	320	7.65E-03												3.66E+02		3.70E+02		3.13	3.13E-03	-2.51E+00	2.57E+00	#N/A
	330	1.53E-02												4.54E+02		4.60E+02		3.03	3.03E-03	-2.52E+00	2.66E+00	#N/A
	340	2.95E-02												5.62E+02		5.68E+02		2.94	2.94E-03	-2.53E+00	2.75E+00	A	5.68E+02
	350	5.46E-02												6.91E+02		6.99E+02		2.86	2.86E-03	-2.54E+00	2.84E+00	5.64E-20	1.00
	375	2.21E-01												1.14E+03		1.15E+03		2.67	2.67E-03	-2.57E+00	3.06E+00	n
	400	7.51E-01												1.82E+03		1.84E+03		2.50	2.50E-03	-2.60E+00	3.26E+00	8.46
	425	2.21E+00												2.85E+03		2.87E+03		2.35	2.35E-03	-2.63E+00	3.46E+00	Ea	1.00
	450	5.77E+00												4.35E+03		4.39E+03		2.22	2.22E-03	-2.65E+00	3.64E+00	-456	4.39E+03
														Scaling:	1.60E+05
1,9 Hshift
	P1	9.04E+06
	P2	8.05E+03														Ea shift
	P3															1.32E+03
-CH2OO. | -CH3	T	Miyoshi 2011												T-dependence	Target	Final		1000/T	1/T	log(1/T)	log(-CH2OO. | -CH3)	log(T)	Replicate
	200	2.99E-11												1.60E+01		2.22E-02		5.00	5.00E-03	-2.30E+00	-1.65E+00	A	1.31E-02
	225	2.62E-09												3.37E+01		9.71E-02		4.44	4.44E-03	-2.35E+00	-1.01E+00	2.55E+05	0.59
	250	9.37E-08												6.72E+01		3.48E-01		4.00	4.00E-03	-2.40E+00	-4.59E-01	Ea
	260	3.23E-07												8.74E+01		5.53E-01		3.85	3.85E-03	-2.41E+00	-2.57E-01	3.36E+03
	270	1.02E-06												1.13E+02		8.62E-01		3.70	3.70E-03	-2.43E+00	-6.47E-02		1.20
	280	2.95E-06												1.44E+02		1.31E+00		3.57	3.57E-03	-2.45E+00	1.19E-01		1.58E+00
	290	7.96E-06												1.84E+02		1.97E+00		3.45	3.45E-03	-2.46E+00	2.94E-01	-8.46E+00
	298	1.68E-05												2.22E+02	2.68E+00	2.68E+00		3.36	3.36E-03	-2.47E+00	4.29E-01	-3.75E+02
	310	4.77E-05												2.92E+02		4.19E+00		3.23	3.23E-03	-2.49E+00	6.22E-01	-1.92E+01
	320	1.07E-04												3.66E+02		5.98E+00		3.13	3.13E-03	-2.51E+00	7.77E-01	#N/A
	330	2.30E-04												4.54E+02		8.42E+00		3.03	3.03E-03	-2.52E+00	9.26E-01	#N/A
	340	4.72E-04												5.62E+02		1.17E+01		2.94	2.94E-03	-2.53E+00	1.07E+00	A	1.17E+01
	350	9.28E-04												6.91E+02		1.61E+01		2.86	2.86E-03	-2.54E+00	1.21E+00	5.64E-20	1.00
	375	4.30E-03												1.14E+03		3.40E+01		2.67	2.67E-03	-2.57E+00	1.53E+00	n
	400	1.64E-02												1.82E+03		6.78E+01		2.50	2.50E-03	-2.60E+00	1.83E+00	8.46
	425	5.37E-02												2.85E+03		1.29E+02		2.35	2.35E-03	-2.63E+00	2.11E+00	Ea	1.00
	450	1.54E-01												4.35E+03		2.34E+02		2.22	2.22E-03	-2.65E+00	2.37E+00	864	2.34E+02
	P1	4.22E+07
	P2	7.72E+03														Ea shift
	P3															5.27E+02
-CH2OO. | -CH2-	T	Miyoshi 2011												T-dependence	Target	Final		1000/T	1/T	log(1/T)	log(-CH2OO. | -CH2-)	log(T)	Replicate
	200	7.27E-10												1.60E+01		1.15E+00		5.00	5.00E-03	-2.30E+00	5.94E-02	A	6.75E-01
	225	5.30E-08												3.37E+01		3.24E+00		4.44	4.44E-03	-2.35E+00	5.10E-01	2.55E+05	0.59
	250	1.64E-06												6.72E+01		8.17E+00		4.00	4.00E-03	-2.40E+00	9.12E-01	Ea
	260	5.37E-06												8.74E+01		1.15E+01		3.85	3.85E-03	-2.41E+00	1.06E+00	2.57E+03
	270	1.61E-05												1.13E+02		1.60E+01		3.70	3.70E-03	-2.43E+00	1.20E+00		1.20
	280	4.48E-05												1.44E+02		2.20E+01		3.57	3.57E-03	-2.45E+00	1.34E+00		2.65E+01
	290	1.16E-04												1.84E+02		2.99E+01		3.45	3.45E-03	-2.46E+00	1.48E+00	-8.46E+00
	298	2.37E-04												2.22E+02	3.79E+01	3.79E+01		3.36	3.36E-03	-2.47E+00	1.58E+00	-3.27E+01
	310	6.46E-04												2.92E+02		5.34E+01		3.23	3.23E-03	-2.49E+00	1.73E+00	-1.92E+01
	320	1.41E-03												3.66E+02		7.04E+01		3.13	3.13E-03	-2.51E+00	1.85E+00	#N/A
	330	2.92E-03												4.54E+02		9.21E+01		3.03	3.03E-03	-2.52E+00	1.96E+00	#N/A
	340	5.81E-03												5.62E+02		1.19E+02		2.94	2.94E-03	-2.53E+00	2.08E+00	A	1.19E+02
	350	1.11E-02												6.91E+02		1.53E+02		2.86	2.86E-03	-2.54E+00	2.19E+00	5.64E-20	1.00
	375	4.84E-02												1.14E+03		2.79E+02		2.67	2.67E-03	-2.57E+00	2.45E+00	n
	400	1.75E-01												1.82E+03		4.88E+02		2.50	2.50E-03	-2.60E+00	2.69E+00	8.46
	425	5.45E-01												2.85E+03		8.24E+02		2.35	2.35E-03	-2.63E+00	2.92E+00	Ea	1.00
	450	1.50E+00												4.35E+03		1.35E+03		2.22	2.22E-03	-2.65E+00	3.13E+00	75	1.35E+03
	P1	1.75E+07
	P2	7.83E+03														Ea shift
	P3															8.99E+02
-CH2OO. | >CH-	T	Miyoshi 2011												T-dependence	Target	Final		1000/T	1/T	log(1/T)	log(-CH2OO. | >CH-)	log(T)	Replicate
	200	1.74E-10												1.60E+01		1.78E-01		5.00	5.00E-03	-2.30E+00	-7.49E-01	A	1.05E-01
	225	1.35E-08												3.37E+01		6.19E-01		4.44	4.44E-03	-2.35E+00	-2.08E-01	2.55E+05	0.59
	250	4.37E-07												6.72E+01		1.84E+00		4.00	4.00E-03	-2.40E+00	2.65E-01	Ea
	260	1.46E-06												8.74E+01		2.75E+00		3.85	3.85E-03	-2.41E+00	4.39E-01	2.94E+03
	270	4.45E-06												1.13E+02		4.03E+00		3.70	3.70E-03	-2.43E+00	6.06E-01		1.20
	280	1.25E-05												1.44E+02		5.82E+00		3.57	3.57E-03	-2.45E+00	7.65E-01		7.01E+00
	290	3.29E-05												1.84E+02		8.28E+00		3.45	3.45E-03	-2.46E+00	9.18E-01	-8.46E+00
	298	6.79E-05												2.22E+02	1.09E+01	1.09E+01		3.36	3.36E-03	-2.47E+00	1.04E+00	-1.94E+02
	310	1.88E-04												2.92E+02		1.61E+01		3.23	3.23E-03	-2.49E+00	1.21E+00	-1.92E+01
	320	4.13E-04												3.66E+02		2.20E+01		3.13	3.13E-03	-2.51E+00	1.34E+00	#N/A
	330	8.68E-04												4.54E+02		2.98E+01		3.03	3.03E-03	-2.52E+00	1.47E+00	#N/A
	340	1.74E-03												5.62E+02		3.99E+01		2.94	2.94E-03	-2.53E+00	1.60E+00	A	3.99E+01
	350	3.37E-03												6.91E+02		5.30E+01		2.86	2.86E-03	-2.54E+00	1.72E+00	5.64E-20	1.00
	375	1.50E-02												1.14E+03		1.03E+02		2.67	2.67E-03	-2.57E+00	2.01E+00	n
	400	5.52E-02												1.82E+03		1.92E+02		2.50	2.50E-03	-2.60E+00	2.28E+00	8.46
	425	1.75E-01												2.85E+03		3.43E+02		2.35	2.35E-03	-2.63E+00	2.54E+00	Ea	1.00
	450	4.86E-01												4.35E+03		5.90E+02		2.22	2.22E-03	-2.65E+00	2.77E+00	448	5.90E+02
	P1	23400000
	P2	8260														Ea shift
	P3															1.24E+03
>CHOO. | -CH3	T	Miyoshi 2011												T-dependence	Target	Final		1000/T	1/T	log(1/T)	log(>CHOO. | -CH3)	log(T)	Replicate
	200	2.71E-11												1.60E+01		3.20E-02		5.00	5.00E-03	-2.30E+00	-1.49E+00	A	1.88E-02
	225	2.67E-09												3.37E+01		1.35E-01		4.44	4.44E-03	-2.35E+00	-8.71E-01	2.55E+05	0.59
	250	1.05E-07												6.72E+01		4.66E-01		4.00	4.00E-03	-2.40E+00	-3.31E-01	Ea
	260	3.73E-07												8.74E+01		7.34E-01		3.85	3.85E-03	-2.41E+00	-1.34E-01	3.28E+03
	270	1.21E-06												1.13E+02		1.13E+00		3.70	3.70E-03	-2.43E+00	5.34E-02		1.20
	280	3.61E-06												1.44E+02		1.71E+00		3.57	3.57E-03	-2.45E+00	2.32E-01		2.06E+00
	290	9.98E-06												1.84E+02		2.53E+00		3.45	3.45E-03	-2.46E+00	4.04E-01	-8.46E+00
	298	2.14E-05												2.22E+02	3.43E+00	3.43E+00		3.36	3.36E-03	-2.47E+00	5.36E-01	-3.43E+02
	310	6.27E-05												2.92E+02		5.31E+00		3.23	3.23E-03	-2.49E+00	7.25E-01	-1.92E+01
	320	1.44E-04												3.66E+02		7.53E+00		3.13	3.13E-03	-2.51E+00	8.77E-01	#N/A
	330	3.15E-04												4.54E+02		1.05E+01		3.03	3.03E-03	-2.52E+00	1.02E+00	#N/A
	340	6.58E-04												5.62E+02		1.45E+01		2.94	2.94E-03	-2.53E+00	1.16E+00	A	1.45E+01
	350	1.32E-03												6.91E+02		1.99E+01		2.86	2.86E-03	-2.54E+00	1.30E+00	5.64E-20	1.00
	375	6.36E-03												1.14E+03		4.14E+01		2.67	2.67E-03	-2.57E+00	1.62E+00	n
	400	2.52E-02												1.82E+03		8.15E+01		2.50	2.50E-03	-2.60E+00	1.91E+00	8.46
	425	8.48E-02												2.85E+03		1.53E+02		2.35	2.35E-03	-2.63E+00	2.18E+00	Ea	1.00
	450	2.50E-01												4.35E+03		2.75E+02		2.22	2.22E-03	-2.65E+00	2.44E+00	791	2.75E+02
	P1	27400000
	P2	7980														Ea shift
	P3															9.16E+02
>CHOO. | -CH2-	T	Miyoshi 2011												T-dependence	Target	Final		1000/T	1/T	log(1/T)	log(>CHOO. | -CH2-)	log(T)	Replicate
	200	1.29E-10												1.60E+01		1.64E-01		5.00	5.00E-03	-2.30E+00	-7.85E-01	A	9.67E-02
	225	1.08E-08												3.37E+01		5.76E-01		4.44	4.44E-03	-2.35E+00	-2.40E-01	2.55E+05	0.59
	250	3.76E-07												6.72E+01		1.73E+00		4.00	4.00E-03	-2.40E+00	2.37E-01	Ea
	260	1.28E-06												8.74E+01		2.58E+00		3.85	3.85E-03	-2.41E+00	4.12E-01	2.96E+03
	270	4.00E-06												1.13E+02		3.80E+00		3.70	3.70E-03	-2.43E+00	5.79E-01		1.20
	280	1.15E-05												1.44E+02		5.49E+00		3.57	3.57E-03	-2.45E+00	7.40E-01		6.61E+00
	290	3.07E-05												1.84E+02		7.82E+00		3.45	3.45E-03	-2.46E+00	8.93E-01	-8.46E+00
	298	6.43E-05												2.22E+02	1.03E+01	1.03E+01		3.36	3.36E-03	-2.47E+00	1.01E+00	-2.01E+02
	310	1.81E-04												2.92E+02		1.53E+01		3.23	3.23E-03	-2.49E+00	1.18E+00	-1.92E+01
	320	4.05E-04												3.66E+02		2.09E+01		3.13	3.13E-03	-2.51E+00	1.32E+00	#N/A
	330	8.62E-04												4.54E+02		2.83E+01		3.03	3.03E-03	-2.52E+00	1.45E+00	#N/A
	340	1.76E-03												5.62E+02		3.80E+01		2.94	2.94E-03	-2.53E+00	1.58E+00	A	3.80E+01
	350	3.43E-03												6.91E+02		5.05E+01		2.86	2.86E-03	-2.54E+00	1.70E+00	5.64E-20	1.00
	375	1.57E-02												1.14E+03		9.90E+01		2.67	2.67E-03	-2.57E+00	2.00E+00	n
	400	5.94E-02												1.82E+03		1.85E+02		2.50	2.50E-03	-2.60E+00	2.27E+00	8.46
	425	1.92E-01												2.85E+03		3.30E+02		2.35	2.35E-03	-2.63E+00	2.52E+00	Ea	1.00
	450	5.45E-01												4.35E+03		5.69E+02		2.22	2.22E-03	-2.65E+00	2.76E+00	464	5.69E+02
	P1	17000000
	P2	7960														Ea shift
	P3															1.04E+03
>CHOO. | >CH-	T	Miyoshi 2011												T-dependence	Target	Final		1000/T	1/T	log(1/T)	log(>CHOO. | >CH-)	log(T)	Replicate
	200	8.82E-11												1.60E+01		8.91E-02		5.00	5.00E-03	-2.30E+00	-1.05E+00	A	5.25E-02
	225	7.35E-09												3.37E+01		3.34E-01		4.44	4.44E-03	-2.35E+00	-4.76E-01	2.55E+05	0.59
	250	2.53E-07												6.72E+01		1.06E+00		4.00	4.00E-03	-2.40E+00	2.45E-02	Ea
	260	8.60E-07												8.74E+01		1.61E+00		3.85	3.85E-03	-2.41E+00	2.08E-01	3.08E+03
	270	2.67E-06												1.13E+02		2.41E+00		3.70	3.70E-03	-2.43E+00	3.83E-01		1.20
	280	7.66E-06												1.44E+02		3.55E+00		3.57	3.57E-03	-2.45E+00	5.50E-01		4.27E+00
	290	2.04E-05												1.84E+02		5.13E+00		3.45	3.45E-03	-2.46E+00	7.10E-01	-8.46E+00
	298	4.26E-05												2.22E+02	6.82E+00	6.82E+00		3.36	3.36E-03	-2.47E+00	8.34E-01	-2.55E+02
	310	1.20E-04												2.92E+02		1.03E+01		3.23	3.23E-03	-2.49E+00	1.01E+00	-1.92E+01
	320	2.68E-04												3.66E+02		1.43E+01		3.13	3.13E-03	-2.51E+00	1.15E+00	#N/A
	330	5.69E-04												4.54E+02		1.96E+01		3.03	3.03E-03	-2.52E+00	1.29E+00	#N/A
	340	1.16E-03												5.62E+02		2.65E+01		2.94	2.94E-03	-2.53E+00	1.42E+00	A	2.65E+01
	350	2.26E-03												6.91E+02		3.56E+01		2.86	2.86E-03	-2.54E+00	1.55E+00	5.64E-20	1.00
	375	1.03E-02												1.14E+03		7.14E+01		2.67	2.67E-03	-2.57E+00	1.85E+00	n
	400	3.87E-02												1.82E+03		1.36E+02		2.50	2.50E-03	-2.60E+00	2.13E+00	8.46
	425	1.25E-01												2.85E+03		2.48E+02		2.35	2.35E-03	-2.63E+00	2.39E+00	Ea	1.00
	450	3.53E-01												4.35E+03		4.34E+02		2.22	2.22E-03	-2.65E+00	2.64E+00	586	4.34E+02
	P1	16900000
	P2	7900														Ea shift
	P3															9.80E+02
>C(OO.)- | -CH3	T	Miyoshi 2011												T-dependence	Target	Final		1000/T	1/T	log(1/T)	log(>C(OO.)- | -CH3)	log(T)	Replicate
	200	1.18E-10												1.60E+01		1.19E-01		5.00	5.00E-03	-2.30E+00	-9.24E-01	A	7.02E-02
	225	9.54E-09												3.37E+01		4.33E-01		4.44	4.44E-03	-2.35E+00	-3.63E-01	2.55E+05	0.59
	250	3.19E-07												6.72E+01		1.34E+00		4.00	4.00E-03	-2.40E+00	1.26E-01	Ea
	260	1.08E-06												8.74E+01		2.02E+00		3.85	3.85E-03	-2.41E+00	3.05E-01	3.02E+03
	270	3.32E-06												1.13E+02		3.00E+00		3.70	3.70E-03	-2.43E+00	4.76E-01		1.20
	280	9.43E-06												1.44E+02		4.37E+00		3.57	3.57E-03	-2.45E+00	6.40E-01		5.26E+00
	290	2.50E-05												1.84E+02		6.27E+00		3.45	3.45E-03	-2.46E+00	7.98E-01	-8.46E+00
	298	5.18E-05												2.22E+02	8.30E+00	8.30E+00		3.36	3.36E-03	-2.47E+00	9.19E-01	-2.29E+02
	310	1.45E-04												2.92E+02		1.24E+01		3.23	3.23E-03	-2.49E+00	1.09E+00	-1.92E+01
	320	3.21E-04												3.66E+02		1.71E+01		3.13	3.13E-03	-2.51E+00	1.23E+00	#N/A
	330	6.78E-04												4.54E+02		2.33E+01		3.03	3.03E-03	-2.52E+00	1.37E+00	#N/A
	340	1.37E-03												5.62E+02		3.15E+01		2.94	2.94E-03	-2.53E+00	1.50E+00	A	3.15E+01
	350	2.66E-03												6.91E+02		4.21E+01		2.86	2.86E-03	-2.54E+00	1.62E+00	5.64E-20	1.00
	375	1.20E-02												1.14E+03		8.35E+01		2.67	2.67E-03	-2.57E+00	1.92E+00	n
	400	4.47E-02												1.82E+03		1.57E+02		2.50	2.50E-03	-2.60E+00	2.20E+00	8.46
	425	1.43E-01												2.85E+03		2.84E+02		2.35	2.35E-03	-2.63E+00	2.45E+00	Ea	1.00
	450	4.01E-01												4.35E+03		4.94E+02		2.22	2.22E-03	-2.65E+00	2.69E+00	528	4.94E+02
	P1	39500000
	P2	7580														Ea shift
	P3															4.07E+02
>C(OO.)- | -CH2-	T	Miyoshi 2011												T-dependence	Target	Final		1000/T	1/T	log(1/T)	log(>C(OO.)- | -CH2-)	log(T)	Replicate
	200	1.37E-09												1.60E+01		2.09E+00		5.00	5.00E-03	-2.30E+00	3.21E-01	A	1.23E+00
	225	9.24E-08												3.37E+01		5.53E+00		4.44	4.44E-03	-2.35E+00	7.43E-01	2.55E+05	0.59
	250	2.68E-06												6.72E+01		1.32E+01		4.00	4.00E-03	-2.40E+00	1.12E+00	Ea
	260	8.61E-06												8.74E+01		1.83E+01		3.85	3.85E-03	-2.41E+00	1.26E+00	2.45E+03
	270	2.54E-05												1.13E+02		2.50E+01		3.70	3.70E-03	-2.43E+00	1.40E+00		1.20
	280	6.91E-05												1.44E+02		3.38E+01		3.57	3.57E-03	-2.45E+00	1.53E+00		4.07E+01
	290	1.76E-04												1.84E+02		4.53E+01		3.45	3.45E-03	-2.46E+00	1.66E+00	-8.46E+00
	298	3.55E-04												2.22E+02	5.67E+01	5.67E+01		3.36	3.36E-03	-2.47E+00	1.75E+00	1.96E+01
	310	9.49E-04												2.92E+02		7.88E+01		3.23	3.23E-03	-2.49E+00	1.90E+00	-1.92E+01
	320	2.04E-03												3.66E+02		1.03E+02		3.13	3.13E-03	-2.51E+00	2.01E+00	#N/A
	330	4.18E-03												4.54E+02		1.33E+02		3.03	3.03E-03	-2.52E+00	2.12E+00	#N/A
	340	8.21E-03												5.62E+02		1.70E+02		2.94	2.94E-03	-2.53E+00	2.23E+00	A	1.70E+02
	350	1.55E-02												6.91E+02		2.16E+02		2.86	2.86E-03	-2.54E+00	2.34E+00	5.64E-20	1.00
	375	6.58E-02												1.14E+03		3.85E+02		2.67	2.67E-03	-2.57E+00	2.59E+00	n
	400	2.33E-01												1.82E+03		6.59E+02		2.50	2.50E-03	-2.60E+00	2.82E+00	8.46
	425	7.09E-01												2.85E+03		1.09E+03		2.35	2.35E-03	-2.63E+00	3.04E+00	Ea	1.00
	450	1.91E+00												4.35E+03		1.76E+03		2.22	2.22E-03	-2.65E+00	3.25E+00	-45	1.76E+03
	P1	7000000
	P2	7590														Ea shift
	P3															9.32E+02
>C(OO.)- | >CH-	T	Miyoshi 2011												T-dependence	Target	Final		1000/T	1/T	log(1/T)	log(>C(OO.)- | >CH-)	log(T)	Replicate
	200	2.31E-10												1.60E+01		1.51E-01		5.00	5.00E-03	-2.30E+00	-8.21E-01	A	8.90E-02
	225	1.57E-08												3.37E+01		5.35E-01		4.44	4.44E-03	-2.35E+00	-2.72E-01	2.55E+05	0.59
	250	4.57E-07												6.72E+01		1.61E+00		4.00	4.00E-03	-2.40E+00	2.08E-01	Ea
	260	1.47E-06												8.74E+01		2.42E+00		3.85	3.85E-03	-2.41E+00	3.84E-01	2.97E+03
	270	4.33E-06												1.13E+02		3.57E+00		3.70	3.70E-03	-2.43E+00	5.53E-01		1.20
	280	1.18E-05												1.44E+02		5.17E+00		3.57	3.57E-03	-2.45E+00	7.14E-01		6.23E+00
	290	3.01E-05												1.84E+02		7.39E+00		3.45	3.45E-03	-2.46E+00	8.68E-01	-8.46E+00
	298	6.08E-05												2.22E+02	9.72E+00	9.72E+00		3.36	3.36E-03	-2.47E+00	9.88E-01	-2.09E+02
	310	1.63E-04												2.92E+02		1.45E+01		3.23	3.23E-03	-2.49E+00	1.16E+00	-1.92E+01
	320	3.50E-04												3.66E+02		1.98E+01		3.13	3.13E-03	-2.51E+00	1.30E+00	#N/A
	330	7.18E-04												4.54E+02		2.70E+01		3.03	3.03E-03	-2.52E+00	1.43E+00	#N/A
	340	1.41E-03												5.62E+02		3.62E+01		2.94	2.94E-03	-2.53E+00	1.56E+00	A	3.62E+01
	350	2.67E-03												6.91E+02		4.82E+01		2.86	2.86E-03	-2.54E+00	1.68E+00	5.64E-20	1.00
	375	1.13E-02												1.14E+03		9.47E+01		2.67	2.67E-03	-2.57E+00	1.98E+00	n
	400	4.02E-02												1.82E+03		1.77E+02		2.50	2.50E-03	-2.60E+00	2.25E+00	8.46
	425	1.23E-01												2.85E+03		3.17E+02		2.35	2.35E-03	-2.63E+00	2.50E+00	Ea	1.00
	450	3.31E-01												4.35E+03		5.48E+02		2.22	2.22E-03	-2.65E+00	2.74E+00	481	5.48E+02

## Sheet: Plot O2QOH
RO2 migration of α-OH hydrogen atoms
1,4 Hshift
	Average temperature dependence
																Ea shift
			(Different T)	(Different T)												-1.21E+02
	T	1,5 pt Vereecken 2019	1,6 ss Vereecken 2019	1,6 st Vereecken 2019	1,7 pt Vereecken 2019									T-dependence	Target	Final		1000/T	1/T	log(1/T)	log()	log(T)	Replicate
	200	3.89E-06	1.70E-05	1.46E-05	3.89E-06									3.89E-06		7.12E-06		5.00	5.00E-03	-2.30E+00	-5.15E+00	A	5.61E-06
	225	2.06E-04	7.32E-04	4.85E-04	1.46E-04									1.74E-04		2.97E-04		4.44	4.44E-03	-2.35E+00	-3.53E+00	1.05E+10	0.79
	250	5.18E-03	1.49E-02	8.30E-03	2.77E-03									3.79E-03		6.14E-03		4.00	4.00E-03	-2.40E+00	-2.21E+00	Ea
	260	1.60E-02	4.24E-02	2.24E-02	7.73E-03									1.11E-02		1.77E-02		3.85	3.85E-03	-2.41E+00	-1.75E+00	7.03E+03
	270	4.57E-02	1.12E-01	5.64E-02	2.01E-02									3.03E-02		4.75E-02		3.70	3.70E-03	-2.43E+00	-1.32E+00		1.09
	280	1.22E-01	2.75E-01	1.34E-01	4.91E-02									7.73E-02		1.19E-01		3.57	3.57E-03	-2.45E+00	-9.24E-01		1.30E-01
	290	3.05E-01	6.36E-01	2.99E-01	1.13E-01									1.86E-01		2.82E-01		3.45	3.45E-03	-2.46E+00	-5.50E-01	-3.81E+00
	298	6.10E-01	1.19E+00	5.51E-01	2.13E-01									3.60E-01	5.40E-01	5.40E-01		3.36	3.36E-03	-2.47E+00	-2.67E-01	-2.57E+03
	310	1.62E+00	2.90E+00	1.30E+00	5.18E-01									9.16E-01		1.35E+00		3.23	3.23E-03	-2.49E+00	1.32E-01	-1.09E+00
	320	3.48E+00	5.76E+00	2.54E+00	1.04E+00									1.90E+00		2.77E+00		3.13	3.13E-03	-2.51E+00	4.43E-01	#N/A
	330	7.16E+00	1.10E+01	4.79E+00	2.00E+00									3.78E+00		5.45E+00		3.03	3.03E-03	-2.52E+00	7.37E-01	#N/A
	340	1.42E+01	2.02E+01	8.73E+00	3.71E+00									7.25E+00		1.04E+01		2.94	2.94E-03	-2.53E+00	1.01E+00	A	1.04E+01
	350	2.70E+01	3.59E+01	1.54E+01	6.68E+00									1.34E+01		1.90E+01		2.86	2.86E-03	-2.54E+00	1.28E+00	8.05E-02	1.00
	375	1.19E+02	1.32E+02	5.64E+01	2.56E+01									5.52E+01		7.62E+01		2.67	2.67E-03	-2.57E+00	1.88E+00	n
	400	4.41E+02	4.15E+02	1.78E+02	8.43E+01									1.93E+02		2.61E+02		2.50	2.50E-03	-2.60E+00	2.42E+00	3.81
	425	1.42E+03			2.44E+02									5.90E+02		7.84E+02		2.35	2.35E-03	-2.63E+00	2.89E+00	Ea	1.00
	450	4.09E+03			6.35E+02									1.61E+03		2.11E+03		2.22	2.22E-03	-2.65E+00	3.32E+00	5909	2.11E+03
	P1
	P2															Ea shift
	P3															1.76E+03
-CH2OO. | -CH2-	T													T-dependence	Target	Final		1000/T	1/T	log(1/T)	log(-CH2OO. | -CH2-)	log(T)	Replicate
	200													3.89E-06		5.85E-10		5.00	5.00E-03	-2.30E+00	-9.23E+00	A	4.61E-10
	225													1.74E-04		6.94E-08		4.44	4.44E-03	-2.35E+00	-7.16E+00	1.05E+10	0.79
	250													3.79E-03		3.31E-06		4.00	4.00E-03	-2.40E+00	-5.48E+00	Ea
	260													1.11E-02		1.27E-05		3.85	3.85E-03	-2.41E+00	-4.89E+00	8.91E+03
	270													3.03E-02		4.47E-05		3.70	3.70E-03	-2.43E+00	-4.35E+00		1.09
	280													7.73E-02		1.44E-04		3.57	3.57E-03	-2.45E+00	-3.84E+00		1.56E-04
	290													1.86E-01		4.29E-04		3.45	3.45E-03	-2.46E+00	-3.37E+00	-3.81E+00
	298													3.60E-01	9.79E-04	9.79E-04		3.36	3.36E-03	-2.47E+00	-3.01E+00	-3.38E+03
	310													9.16E-01		3.13E-03		3.23	3.23E-03	-2.49E+00	-2.50E+00	-1.09E+00
	320													1.90E+00		7.75E-03		3.13	3.13E-03	-2.51E+00	-2.11E+00	#N/A
	330													3.78E+00		1.82E-02		3.03	3.03E-03	-2.52E+00	-1.74E+00	#N/A
	340													7.25E+00		4.09E-02		2.94	2.94E-03	-2.53E+00	-1.39E+00	A	4.09E-02
	350													1.34E+01		8.79E-02		2.86	2.86E-03	-2.54E+00	-1.06E+00	8.05E-02	1.00
	375													5.52E+01		5.04E-01		2.67	2.67E-03	-2.57E+00	-2.97E-01	n
	400													1.93E+02		2.36E+00		2.50	2.50E-03	-2.60E+00	3.73E-01	3.81
	425													5.90E+02		9.36E+00		2.35	2.35E-03	-2.63E+00	9.71E-01	Ea	1.00
	450													1.61E+03		3.22E+01		2.22	2.22E-03	-2.65E+00	1.51E+00	7790	3.22E+01
	P0
	P1	1.38E+12
	P2	1.38E+04														Ea shift
	P3	1.76E+08														3.18E+03
-CH2OO. | >CH-	T	Otkjaer et al. 2018												T-dependence	Target	Final		1000/T	1/T	log(1/T)	log(-CH2OO. | >CH-)	log(T)	Replicate
	200													3.89E-06		4.75E-13		5.00	5.00E-03	-2.30E+00	-1.23E+01	A	3.74E-13
	225													1.74E-04		1.24E-10		4.44	4.44E-03	-2.35E+00	-9.91E+00	1.05E+10	0.79
	250													3.79E-03		1.12E-08		4.00	4.00E-03	-2.40E+00	-7.95E+00	Ea
	260													1.11E-02		5.35E-08		3.85	3.85E-03	-2.41E+00	-7.27E+00	1.03E+04
	270													3.03E-02		2.29E-07		3.70	3.70E-03	-2.43E+00	-6.64E+00		1.09
	280													7.73E-02		8.92E-07		3.57	3.57E-03	-2.45E+00	-6.05E+00		9.69E-07
	290	4.05E-06												1.86E-01		3.17E-06		3.45	3.45E-03	-2.46E+00	-5.50E+00	-3.81E+00
	298	8.25E-06												3.60E-01	8.25E-06	8.25E-06		3.36	3.36E-03	-2.47E+00	-5.08E+00	-4.00E+03
	310	2.36E-05												9.16E-01		3.18E-05		3.23	3.23E-03	-2.49E+00	-4.50E+00	-1.09E+00
	320	5.54E-05												1.90E+00		9.07E-05		3.13	3.13E-03	-2.51E+00	-4.04E+00	#N/A
	330													3.78E+00		2.44E-04		3.03	3.03E-03	-2.52E+00	-3.61E+00	#N/A
	340													7.25E+00		6.22E-04		2.94	2.94E-03	-2.53E+00	-3.21E+00	A	6.22E-04
	350													1.34E+01		1.51E-03		2.86	2.86E-03	-2.54E+00	-2.82E+00	8.05E-02	1.00
	375													5.52E+01		1.13E-02		2.67	2.67E-03	-2.57E+00	-1.95E+00	n
	400													1.93E+02		6.73E-02		2.50	2.50E-03	-2.60E+00	-1.17E+00	3.81
	425													5.90E+02		3.29E-01		2.35	2.35E-03	-2.63E+00	-4.83E-01	Ea	1.00
	450													1.61E+03		1.36E+00		2.22	2.22E-03	-2.65E+00	1.35E-01	9213	1.36E+00
	P0
	P1
	P2															Ea shift
	P3															3.55E+03
>CHOO. | -CH2-	T	Jørgensen et al. 2016												T-dependence	Target	Final		1000/T	1/T	log(1/T)	log(>CHOO. | -CH2-)	log(T)	Replicate
	200													3.89E-06		7.54E-14		5.00	5.00E-03	-2.30E+00	-1.31E+01	A	5.94E-14
	225													1.74E-04		2.42E-11		4.44	4.44E-03	-2.35E+00	-1.06E+01	1.05E+10	0.79
	250													3.79E-03		2.56E-09		4.00	4.00E-03	-2.40E+00	-8.59E+00	Ea
	260													1.11E-02		1.30E-08		3.85	3.85E-03	-2.41E+00	-7.89E+00	1.07E+04
	270													3.03E-02		5.87E-08		3.70	3.70E-03	-2.43E+00	-7.23E+00		1.09
	280													7.73E-02		2.40E-07		3.57	3.57E-03	-2.45E+00	-6.62E+00		2.60E-07
	290													1.86E-01		8.91E-07		3.45	3.45E-03	-2.46E+00	-6.05E+00	-3.81E+00
	298	2.40E-06												3.60E-01	2.40E-06	2.40E-06		3.36	3.36E-03	-2.47E+00	-5.62E+00	-4.16E+03
	310													9.16E-01		9.69E-06		3.23	3.23E-03	-2.49E+00	-5.01E+00	-1.09E+00
	320													1.90E+00		2.87E-05		3.13	3.13E-03	-2.51E+00	-4.54E+00	#N/A
	330													3.78E+00		8.00E-05		3.03	3.03E-03	-2.52E+00	-4.10E+00	#N/A
	340													7.25E+00		2.11E-04		2.94	2.94E-03	-2.53E+00	-3.68E+00	A	2.11E-04
	350													1.34E+01		5.26E-04		2.86	2.86E-03	-2.54E+00	-3.28E+00	8.05E-02	1.00
	375													5.52E+01		4.25E-03		2.67	2.67E-03	-2.57E+00	-2.37E+00	n
	400													1.93E+02		2.68E-02		2.50	2.50E-03	-2.60E+00	-1.57E+00	3.81
	425													5.90E+02		1.38E-01		2.35	2.35E-03	-2.63E+00	-8.59E-01	Ea	1.00
	450													1.61E+03		6.02E-01		2.22	2.22E-03	-2.65E+00	-2.20E-01	9581	6.02E-01
	P0
	P1	1.50E+12	1.75E+12
	P2	13091	13488													Ea shift
	P3	1.65E+08	1.58E+08													2.79E+03
>CHOO. | >CH-	T	Praske et al. 2018	Praske et al. 2018											T-dependence	Target	Final		1000/T	1/T	log(1/T)	log(>CHOO. | >CH-)	log(T)	Replicate
	200													3.89E-06		3.46E-12		5.00	5.00E-03	-2.30E+00	-1.15E+01	A	2.73E-12
	225													1.74E-04		7.27E-10		4.44	4.44E-03	-2.35E+00	-9.14E+00	1.05E+10	0.79
	250													3.79E-03		5.47E-08		4.00	4.00E-03	-2.40E+00	-7.26E+00	Ea
	260													1.11E-02		2.46E-07		3.85	3.85E-03	-2.41E+00	-6.61E+00	9.94E+03
	270													3.03E-02		9.99E-07		3.70	3.70E-03	-2.43E+00	-6.00E+00		1.09
	280													7.73E-02		3.68E-06		3.57	3.57E-03	-2.45E+00	-5.43E+00		4.01E-06
	290	3.24E-05	7.30E-06											1.86E-01		1.25E-05		3.45	3.45E-03	-2.46E+00	-4.90E+00	-3.81E+00
	298	6.41E-05	1.53E-05											3.60E-01	3.13E-05	3.13E-05		3.36	3.36E-03	-2.47E+00	-4.50E+00	-3.83E+03
	310	1.75E-04	4.52E-05											9.16E-01		1.14E-04		3.23	3.23E-03	-2.49E+00	-3.94E+00	-1.09E+00
	320	3.96E-04	1.09E-04											1.90E+00		3.14E-04		3.13	3.13E-03	-2.51E+00	-3.50E+00	#N/A
	330													3.78E+00		8.14E-04		3.03	3.03E-03	-2.52E+00	-3.09E+00	#N/A
	340													7.25E+00		2.00E-03		2.94	2.94E-03	-2.53E+00	-2.70E+00	A	2.00E-03
	350													1.34E+01		4.69E-03		2.86	2.86E-03	-2.54E+00	-2.33E+00	8.05E-02	1.00
	375													5.52E+01		3.27E-02		2.67	2.67E-03	-2.57E+00	-1.49E+00	n
	400													1.93E+02		1.82E-01		2.50	2.50E-03	-2.60E+00	-7.40E-01	3.81
	425													5.90E+02		8.38E-01		2.35	2.35E-03	-2.63E+00	-7.69E-02	Ea	1.00
	450													1.61E+03		3.30E+00		2.22	2.22E-03	-2.65E+00	5.18E-01	8816	3.30E+00
	P0
	P1
	P2															Ea shift
	P3															2.91E+03
>C(OO.)- | -CH2-	T													T-dependence	Target	Final		1000/T	1/T	log(1/T)	log(>C(OO.)- | -CH2-)	log(T)	Replicate
	200													3.89E-06		1.85E-12		5.00	5.00E-03	-2.30E+00	-1.17E+01	A	1.46E-12
	225													1.74E-04		4.17E-10		4.44	4.44E-03	-2.35E+00	-9.38E+00	1.05E+10	0.79
	250													3.79E-03		3.31E-08		4.00	4.00E-03	-2.40E+00	-7.48E+00	Ea
	260													1.11E-02		1.52E-07		3.85	3.85E-03	-2.41E+00	-6.82E+00	1.01E+04
	270													3.03E-02		6.28E-07		3.70	3.70E-03	-2.43E+00	-6.20E+00		1.09
	280													7.73E-02		2.36E-06		3.57	3.57E-03	-2.45E+00	-5.63E+00		2.56E-06
	290													1.86E-01		8.10E-06		3.45	3.45E-03	-2.46E+00	-5.09E+00	-3.81E+00
	298													3.60E-01	2.06E-05	2.06E-05		3.36	3.36E-03	-2.47E+00	-4.69E+00	-3.88E+03
	310													9.16E-01		7.64E-05		3.23	3.23E-03	-2.49E+00	-4.12E+00	-1.09E+00
	320													1.90E+00		2.12E-04		3.13	3.13E-03	-2.51E+00	-3.67E+00	#N/A
	330													3.78E+00		5.57E-04		3.03	3.03E-03	-2.52E+00	-3.25E+00	#N/A
	340													7.25E+00		1.38E-03		2.94	2.94E-03	-2.53E+00	-2.86E+00	A	1.38E-03
	350													1.34E+01		3.28E-03		2.86	2.86E-03	-2.54E+00	-2.48E+00	8.05E-02	1.00
	375													5.52E+01		2.34E-02		2.67	2.67E-03	-2.57E+00	-1.63E+00	n
	400													1.93E+02		1.33E-01		2.50	2.50E-03	-2.60E+00	-8.76E-01	3.81
	425													5.90E+02		6.24E-01		2.35	2.35E-03	-2.63E+00	-2.05E-01	Ea	1.00
	450													1.61E+03		2.50E+00		2.22	2.22E-03	-2.65E+00	3.97E-01	8941	2.50E+00
	P1
	P2															Ea shift
	P3															1.18E+03
>C(OO.)- | >CH-	T													T-dependence	Target	Final		1000/T	1/T	log(1/T)	log(>C(OO.)- | >CH-)	log(T)	Replicate
	200													3.89E-06		1.09E-08		5.00	5.00E-03	-2.30E+00	-7.96E+00	A	8.58E-09
	225													1.74E-04		9.35E-07		4.44	4.44E-03	-2.35E+00	-6.03E+00	1.05E+10	0.79
	250													3.79E-03		3.44E-05		4.00	4.00E-03	-2.40E+00	-4.46E+00	Ea
	260													1.11E-02		1.21E-04		3.85	3.85E-03	-2.41E+00	-3.92E+00	8.33E+03
	270													3.03E-02		3.90E-04		3.70	3.70E-03	-2.43E+00	-3.41E+00		1.09
	280													7.73E-02		1.16E-03		3.57	3.57E-03	-2.45E+00	-2.94E+00		1.26E-03
	290													1.86E-01		3.22E-03		3.45	3.45E-03	-2.46E+00	-2.49E+00	-3.81E+00
	298													3.60E-01	6.97E-03	6.97E-03		3.36	3.36E-03	-2.47E+00	-2.16E+00	-3.13E+03
	310													9.16E-01		2.07E-02		3.23	3.23E-03	-2.49E+00	-1.69E+00	-1.09E+00
	320													1.90E+00		4.82E-02		3.13	3.13E-03	-2.51E+00	-1.32E+00	#N/A
	330													3.78E+00		1.07E-01		3.03	3.03E-03	-2.52E+00	-9.70E-01	#N/A
	340													7.25E+00		2.28E-01		2.94	2.94E-03	-2.53E+00	-6.41E-01	A	2.28E-01
	350													1.34E+01		4.67E-01		2.86	2.86E-03	-2.54E+00	-3.30E-01	8.05E-02	1.00
	375													5.52E+01		2.40E+00		2.67	2.67E-03	-2.57E+00	3.80E-01	n
	400													1.93E+02		1.02E+01		2.50	2.50E-03	-2.60E+00	1.01E+00	3.81
	425													5.90E+02		3.71E+01		2.35	2.35E-03	-2.63E+00	1.57E+00	Ea	1.00
	450													1.61E+03		1.18E+02		2.22	2.22E-03	-2.65E+00	2.07E+00	7205	1.18E+02
1,5 Hshift
	P1
	P2															Ea shift
	P3															1.12E+03
-CH2OO. | -CH2-	T													T-dependence	Target	Final		1000/T	1/T	log(1/T)	log(-CH2OO. | -CH2-)	log(T)	Replicate
	200													3.89E-06		1.44E-08		5.00	5.00E-03	-2.30E+00	-7.84E+00	A	1.13E-08
	225													1.74E-04		1.20E-06		4.44	4.44E-03	-2.35E+00	-5.92E+00	1.05E+10	0.79
	250													3.79E-03		4.29E-05		4.00	4.00E-03	-2.40E+00	-4.37E+00	Ea
	260													1.11E-02		1.50E-04		3.85	3.85E-03	-2.41E+00	-3.83E+00	8.27E+03
	270													3.03E-02		4.78E-04		3.70	3.70E-03	-2.43E+00	-3.32E+00		1.09
	280													7.73E-02		1.41E-03		3.57	3.57E-03	-2.45E+00	-2.85E+00		1.54E-03
	290													1.86E-01		3.90E-03		3.45	3.45E-03	-2.46E+00	-2.41E+00	-3.81E+00
	298													3.60E-01	8.39E-03	8.39E-03		3.36	3.36E-03	-2.47E+00	-2.08E+00	-3.11E+03
	310													9.16E-01		2.47E-02		3.23	3.23E-03	-2.49E+00	-1.61E+00	-1.09E+00
	320													1.90E+00		5.73E-02		3.13	3.13E-03	-2.51E+00	-1.24E+00	#N/A
	330													3.78E+00		1.27E-01		3.03	3.03E-03	-2.52E+00	-8.97E-01	#N/A
	340													7.25E+00		2.69E-01		2.94	2.94E-03	-2.53E+00	-5.71E-01	A	2.69E-01
	350													1.34E+01		5.47E-01		2.86	2.86E-03	-2.54E+00	-2.62E-01	8.05E-02	1.00
	375													5.52E+01		2.78E+00		2.67	2.67E-03	-2.57E+00	4.44E-01	n
	400													1.93E+02		1.17E+01		2.50	2.50E-03	-2.60E+00	1.07E+00	3.81
	425													5.90E+02		4.22E+01		2.35	2.35E-03	-2.63E+00	1.63E+00	Ea	1.00
	450													1.61E+03		1.34E+02		2.22	2.22E-03	-2.65E+00	2.13E+00	7150	1.34E+02
	P0
	P1	5.78E+11	5.54E-02
	P2	1.01E+04	4.12E+00													Ea shift
	P3	9.77E+07	6276.86241222459											average		7.82E+02
-CH2OO. | >CH-	T	Otkjaer et al. 2018	Vereecken 2019 (rel)											T-dependence	Target	Final		1000/T	1/T	log(1/T)	log(-CH2OO. | >CH-)	log(T)	Replicate
	200		3.89E-06											3.89E-06		7.80E-08		5.00	5.00E-03	-2.30E+00	-7.11E+00	A	6.03E-08
	225		2.06E-04											2.06E-04		6.39E-06		4.44	4.44E-03	-2.35E+00	-5.19E+00	5.53E+10	0.77
	250		5.18E-03											5.18E-03		2.27E-04		4.00	4.00E-03	-2.40E+00	-3.64E+00	Ea
	260		1.60E-02											1.60E-02		7.92E-04		3.85	3.85E-03	-2.41E+00	-3.10E+00	8.27E+03
	270		4.57E-02											4.57E-02		2.53E-03		3.70	3.70E-03	-2.43E+00	-2.60E+00		1.09
	280		1.22E-01											1.22E-01		7.47E-03		3.57	3.57E-03	-2.45E+00	-2.13E+00		8.17E-03
	290	2.38E-02	3.05E-01											3.05E-01		2.06E-02		3.45	3.45E-03	-2.46E+00	-1.69E+00	-4.12E+00
	298	4.42E-02	6.10E-01											6.10E-01	4.42E-02	4.42E-02		3.36	3.36E-03	-2.47E+00	-1.35E+00	-3.07E+03
	310	1.09E-01	1.62E+00											1.62E+00		1.30E-01		3.23	3.23E-03	-2.49E+00	-8.85E-01	-1.26E+00
	320	2.24E-01	3.48E+00											3.48E+00		3.02E-01		3.13	3.13E-03	-2.51E+00	-5.19E-01	#N/A
	330		7.16E+00											7.16E+00		6.70E-01		3.03	3.03E-03	-2.52E+00	-1.74E-01	#N/A
	340		1.42E+01											1.42E+01		1.42E+00		2.94	2.94E-03	-2.53E+00	1.52E-01	A	1.42E+00
	350		2.70E+01											2.70E+01		2.90E+00		2.86	2.86E-03	-2.54E+00	4.62E-01	5.54E-02	1.00
	375		1.19E+02											1.19E+02		1.48E+01		2.67	2.67E-03	-2.57E+00	1.17E+00	n
	400		4.41E+02											4.41E+02		6.25E+01		2.50	2.50E-03	-2.60E+00	1.80E+00	4.12
	425		1.42E+03											1.42E+03		2.26E+02		2.35	2.35E-03	-2.63E+00	2.35E+00	Ea	1.00
	450		4.09E+03											4.09E+03		7.21E+02		2.22	2.22E-03	-2.65E+00	2.86E+00	7059	7.21E+02
	P0
	P1
	P2															Ea shift
	P3													average		9.96E+02
>CHOO. | -CH2-	T													T-dependence	Target	Final		1000/T	1/T	log(1/T)	log(>CHOO. | -CH2-)	log(T)	Replicate
	200													3.89E-06		2.68E-08		5.00	5.00E-03	-2.30E+00	-7.57E+00	A	2.11E-08
	225													1.74E-04		2.08E-06		4.44	4.44E-03	-2.35E+00	-5.68E+00	1.05E+10	0.79
	250													3.79E-03		7.05E-05		4.00	4.00E-03	-2.40E+00	-4.15E+00	Ea
	260													1.11E-02		2.41E-04		3.85	3.85E-03	-2.41E+00	-3.62E+00	8.15E+03
	270													3.03E-02		7.58E-04		3.70	3.70E-03	-2.43E+00	-3.12E+00		1.09
	280													7.73E-02		2.21E-03		3.57	3.57E-03	-2.45E+00	-2.66E+00		2.40E-03
	290													1.86E-01		5.99E-03		3.45	3.45E-03	-2.46E+00	-2.22E+00	-3.81E+00
	298													3.60E-01	1.27E-02	1.27E-02		3.36	3.36E-03	-2.47E+00	-1.89E+00	-3.05E+03
	310													9.16E-01		3.69E-02		3.23	3.23E-03	-2.49E+00	-1.43E+00	-1.09E+00
	320													1.90E+00		8.45E-02		3.13	3.13E-03	-2.51E+00	-1.07E+00	#N/A
	330													3.78E+00		1.85E-01		3.03	3.03E-03	-2.52E+00	-7.33E-01	#N/A
	340													7.25E+00		3.88E-01		2.94	2.94E-03	-2.53E+00	-4.12E-01	A	3.88E-01
	350													1.34E+01		7.81E-01		2.86	2.86E-03	-2.54E+00	-1.07E-01	8.05E-02	1.00
	375													5.52E+01		3.87E+00		2.67	2.67E-03	-2.57E+00	5.88E-01	n
	400													1.93E+02		1.60E+01		2.50	2.50E-03	-2.60E+00	1.20E+00	3.81
	425													5.90E+02		5.66E+01		2.35	2.35E-03	-2.63E+00	1.75E+00	Ea	1.00
	450													1.61E+03		1.76E+02		2.22	2.22E-03	-2.65E+00	2.25E+00	7026	1.76E+02
	P1	5.02E+11	1.94E+12		1.02E+12	3.10E+11
	P2	9517.1	10084		9.99E+03	9.49E+03										Ea shift
	P3	8.19E+07	9.27E+07		8.99E+07	8.20E+07								average		3.96E+02
>CHOO. | >CH-	T	Praske et al. 2018	Praske et al. 2018	Praske et al. 2018 (exp)	Otkjaer et al. 2018	Otkjaer et al. 2018								T-dependence	Target	Final		1000/T	1/T	log(1/T)	log(>CHOO. | >CH-)	log(T)	Replicate
	200													3.89E-06		5.38E-07		5.00	5.00E-03	-2.30E+00	-6.27E+00	A	4.24E-07
	225													1.74E-04		3.00E-05		4.44	4.44E-03	-2.35E+00	-4.52E+00	1.05E+10	0.79
	250													3.79E-03		7.79E-04		4.00	4.00E-03	-2.40E+00	-3.11E+00	Ea
	260													1.11E-02		2.43E-03		3.85	3.85E-03	-2.41E+00	-2.61E+00	7.55E+03
	270													3.03E-02		7.01E-03		3.70	3.70E-03	-2.43E+00	-2.15E+00		1.09
	280													7.73E-02		1.88E-02		3.57	3.57E-03	-2.45E+00	-1.73E+00		2.05E-02
	290	8.08E-02	6.86E-02		4.45E-02	5.49E-02								1.86E-01		4.75E-02		3.45	3.45E-03	-2.46E+00	-1.32E+00	-3.81E+00
	298	1.50E-01	1.29E-01	4.80E-02	8.41E-02	1.02E-01								3.60E-01	9.55E-02	9.55E-02		3.36	3.36E-03	-2.47E+00	-1.02E+00	-2.79E+03
	310	3.65E-01	3.24E-01		2.11E-01	2.46E-01								9.16E-01		2.56E-01		3.23	3.23E-03	-2.49E+00	-5.92E-01	-1.09E+00
	320	7.42E-01	6.76E-01	3.10E-01	4.38E-01	5.00E-01								1.90E+00		5.52E-01		3.13	3.13E-03	-2.51E+00	-2.58E-01	#N/A
	330													3.78E+00		1.14E+00		3.03	3.03E-03	-2.52E+00	5.71E-02	#N/A
	340													7.25E+00		2.27E+00		2.94	2.94E-03	-2.53E+00	3.55E-01	A	2.27E+00
	350													1.34E+01		4.34E+00		2.86	2.86E-03	-2.54E+00	6.38E-01	8.05E-02	1.00
	375													5.52E+01		1.92E+01		2.67	2.67E-03	-2.57E+00	1.28E+00	n
	400													1.93E+02		7.17E+01		2.50	2.50E-03	-2.60E+00	1.86E+00	3.81
	425													5.90E+02		2.32E+02		2.35	2.35E-03	-2.63E+00	2.37E+00	Ea	1.00
	450													1.61E+03		6.70E+02		2.22	2.22E-03	-2.65E+00	2.83E+00	6425	6.70E+02
	P1
	P2															Ea shift
	P3													average		1.30E+03
>C(OO.)- | -CH2-	T													T-dependence	Target	Final		1000/T	1/T	log(1/T)	log(>C(OO.)- | -CH2-)	log(T)	Replicate
	200													3.89E-06		5.96E-09		5.00	5.00E-03	-2.30E+00	-8.22E+00	A	4.69E-09
	225													1.74E-04		5.47E-07		4.44	4.44E-03	-2.35E+00	-6.26E+00	1.05E+10	0.79
	250													3.79E-03		2.12E-05		4.00	4.00E-03	-2.40E+00	-4.67E+00	Ea
	260													1.11E-02		7.60E-05		3.85	3.85E-03	-2.41E+00	-4.12E+00	8.45E+03
	270													3.03E-02		2.49E-04		3.70	3.70E-03	-2.43E+00	-3.60E+00		1.09
	280													7.73E-02		7.55E-04		3.57	3.57E-03	-2.45E+00	-3.12E+00		8.21E-04
	290													1.86E-01		2.13E-03		3.45	3.45E-03	-2.46E+00	-2.67E+00	-3.81E+00
	298													3.60E-01	4.65E-03	4.65E-03		3.36	3.36E-03	-2.47E+00	-2.33E+00	-3.18E+03
	310													9.16E-01		1.40E-02		3.23	3.23E-03	-2.49E+00	-1.85E+00	-1.09E+00
	320													1.90E+00		3.31E-02		3.13	3.13E-03	-2.51E+00	-1.48E+00	#N/A
	330													3.78E+00		7.44E-02		3.03	3.03E-03	-2.52E+00	-1.13E+00	#N/A
	340													7.25E+00		1.60E-01		2.94	2.94E-03	-2.53E+00	-7.95E-01	A	1.60E-01
	350													1.34E+01		3.31E-01		2.86	2.86E-03	-2.54E+00	-4.80E-01	8.05E-02	1.00
	375													5.52E+01		1.74E+00		2.67	2.67E-03	-2.57E+00	2.40E-01	n
	400													1.93E+02		7.54E+00		2.50	2.50E-03	-2.60E+00	8.78E-01	3.81
	425													5.90E+02		2.79E+01		2.35	2.35E-03	-2.63E+00	1.45E+00	Ea	1.00
	450													1.61E+03		9.05E+01		2.22	2.22E-03	-2.65E+00	1.96E+00	7326	9.05E+01
	P1	9.52E+11	9.52E+11
	P2	9543.6	9.54E+03													Ea shift
	P3	8.82E+07	8.82E+07											average		2.49E+01
>C(OO.)- | >CH-	T	Praske et al. 2019	Otkjaer et al. 2018											T-dependence	Target	Final		1000/T	1/T	log(1/T)	log(>C(OO.)- | >CH-)	log(T)	Replicate
	200													3.89E-06		3.44E-06		5.00	5.00E-03	-2.30E+00	-5.46E+00	A	2.71E-06
	225													1.74E-04		1.56E-04		4.44	4.44E-03	-2.35E+00	-3.81E+00	1.05E+10	0.79
	250													3.79E-03		3.43E-03		4.00	4.00E-03	-2.40E+00	-2.46E+00	Ea
	260													1.11E-02		1.01E-02		3.85	3.85E-03	-2.41E+00	-2.00E+00	7.18E+03
	270													3.03E-02		2.77E-02		3.70	3.70E-03	-2.43E+00	-1.56E+00		1.09
	280													7.73E-02		7.08E-02		3.57	3.57E-03	-2.45E+00	-1.15E+00		7.69E-02
	290	1.81E-01	1.83E-01											1.86E-01		1.70E-01		3.45	3.45E-03	-2.46E+00	-7.68E-01	-3.81E+00
	298	3.29E-01	3.33E-01											3.60E-01	3.31E-01	3.31E-01		3.36	3.36E-03	-2.47E+00	-4.80E-01	-2.63E+03
	310	7.84E-01	7.93E-01											9.16E-01		8.46E-01		3.23	3.23E-03	-2.49E+00	-7.28E-02	-1.09E+00
	320	1.57E+00	1.59E+00											1.90E+00		1.76E+00		3.13	3.13E-03	-2.51E+00	2.45E-01	#N/A
	330													3.78E+00		3.51E+00		3.03	3.03E-03	-2.52E+00	5.45E-01	#N/A
	340													7.25E+00		6.74E+00		2.94	2.94E-03	-2.53E+00	8.29E-01	A	6.74E+00
	350													1.34E+01		1.25E+01		2.86	2.86E-03	-2.54E+00	1.10E+00	8.05E-02	1.00
	375													5.52E+01		5.16E+01		2.67	2.67E-03	-2.57E+00	1.71E+00	n
	400													1.93E+02		1.81E+02		2.50	2.50E-03	-2.60E+00	2.26E+00	3.81
	425													5.90E+02		5.56E+02		2.35	2.35E-03	-2.63E+00	2.75E+00	Ea	1.00
	450													1.61E+03		1.53E+03		2.22	2.22E-03	-2.65E+00	3.18E+00	6055	1.53E+03
1,6 Hshift
	P1	4.80E+10
	P2	9.71E+03														Ea shift
	P3	8.63E+07												average		1.10E+03
-CH2OO. | -CH2-	T	Otkjaer et al. 2018												T-dependence	Target	Final		1000/T	1/T	log(1/T)	log(-CH2OO. | -CH2-)	log(T)	Replicate
	200													3.89E-06		1.55E-08		5.00	5.00E-03	-2.30E+00	-7.81E+00	A	1.22E-08
	225													1.74E-04		1.28E-06		4.44	4.44E-03	-2.35E+00	-5.89E+00	1.05E+10	0.79
	250													3.79E-03		4.56E-05		4.00	4.00E-03	-2.40E+00	-4.34E+00	Ea
	260													1.11E-02		1.59E-04		3.85	3.85E-03	-2.41E+00	-3.80E+00	8.26E+03
	270													3.03E-02		5.07E-04		3.70	3.70E-03	-2.43E+00	-3.30E+00		1.09
	280													7.73E-02		1.50E-03		3.57	3.57E-03	-2.45E+00	-2.83E+00		1.63E-03
	290	4.75E-03												1.86E-01		4.12E-03		3.45	3.45E-03	-2.46E+00	-2.39E+00	-3.81E+00
	298	8.84E-03												3.60E-01	8.84E-03	8.84E-03		3.36	3.36E-03	-2.47E+00	-2.05E+00	-3.10E+03
	310	2.17E-02												9.16E-01		2.60E-02		3.23	3.23E-03	-2.49E+00	-1.59E+00	-1.09E+00
	320	4.44E-02												1.90E+00		6.02E-02		3.13	3.13E-03	-2.51E+00	-1.22E+00	#N/A
	330													3.78E+00		1.33E-01		3.03	3.03E-03	-2.52E+00	-8.76E-01	#N/A
	340													7.25E+00		2.81E-01		2.94	2.94E-03	-2.53E+00	-5.51E-01	A	2.81E-01
	350													1.34E+01		5.72E-01		2.86	2.86E-03	-2.54E+00	-2.42E-01	8.05E-02	1.00
	375													5.52E+01		2.90E+00		2.67	2.67E-03	-2.57E+00	4.62E-01	n
	400													1.93E+02		1.22E+01		2.50	2.50E-03	-2.60E+00	1.09E+00	3.81
	425													5.90E+02		4.38E+01		2.35	2.35E-03	-2.63E+00	1.64E+00	Ea	1.00
	450													1.61E+03		1.38E+02		2.22	2.22E-03	-2.65E+00	2.14E+00	7134	1.38E+02
	P1	3.23E+10
	P2	8.60E+03														Ea shift
	P3	7.83E+07												average		2.03E+02
-CH2OO. | >CH-	T	Otkjaer et al. 2018												T-dependence	Target	Final		1000/T	1/T	log(1/T)	log(-CH2OO. | >CH-)	log(T)	Replicate
	200													3.89E-06		1.41E-06		5.00	5.00E-03	-2.30E+00	-5.85E+00	A	1.11E-06
	225													1.74E-04		7.05E-05		4.44	4.44E-03	-2.35E+00	-4.15E+00	1.05E+10	0.79
	250													3.79E-03		1.68E-03		4.00	4.00E-03	-2.40E+00	-2.77E+00	Ea
	260													1.11E-02		5.10E-03		3.85	3.85E-03	-2.41E+00	-2.29E+00	7.36E+03
	270													3.03E-02		1.43E-02		3.70	3.70E-03	-2.43E+00	-1.84E+00		1.09
	280													7.73E-02		3.75E-02		3.57	3.57E-03	-2.45E+00	-1.43E+00		4.07E-02
	290	1.06E-01												1.86E-01		9.23E-02		3.45	3.45E-03	-2.46E+00	-1.03E+00	-3.81E+00
	298	1.82E-01												3.60E-01	1.82E-01	1.82E-01		3.36	3.36E-03	-2.47E+00	-7.39E-01	-2.71E+03
	310	4.00E-01												9.16E-01		4.76E-01		3.23	3.23E-03	-2.49E+00	-3.22E-01	-1.09E+00
	320	7.50E-01												1.90E+00		1.01E+00		3.13	3.13E-03	-2.51E+00	3.31E-03	#N/A
	330													3.78E+00		2.04E+00		3.03	3.03E-03	-2.52E+00	3.11E-01	#N/A
	340													7.25E+00		3.99E+00		2.94	2.94E-03	-2.53E+00	6.01E-01	A	3.99E+00
	350													1.34E+01		7.53E+00		2.86	2.86E-03	-2.54E+00	8.77E-01	8.05E-02	1.00
	375													5.52E+01		3.21E+01		2.67	2.67E-03	-2.57E+00	1.51E+00	n
	400													1.93E+02		1.16E+02		2.50	2.50E-03	-2.60E+00	2.06E+00	3.81
	425													5.90E+02		3.66E+02		2.35	2.35E-03	-2.63E+00	2.56E+00	Ea	1.00
	450													1.61E+03		1.03E+03		2.22	2.22E-03	-2.65E+00	3.01E+00	6233	1.03E+03
	P1	3.54E+08	6.40E+10
	P2	5.02E-01	1.69E+01													Ea shift
	P3	6665.24404155624														4.02E+02
>CHOO. | -CH2-	T	Vereecken 2019	Perrin et al. 1998											T-dependence	Target	Final		1000/T	1/T	log(1/T)	log(>CHOO. | -CH2-)	log(T)	Replicate
	200	1.70E-05												1.70E-05		2.27E-06		5.00	5.00E-03	-2.30E+00	-5.64E+00	A	2.15E-06
	225	7.32E-04												7.32E-04		1.22E-04		4.44	4.44E-03	-2.35E+00	-3.91E+00	1.11E+10	0.94
	250	1.49E-02												1.49E-02		2.99E-03		4.00	4.00E-03	-2.40E+00	-2.53E+00	Ea
	260	4.24E-02												4.24E-02		9.03E-03		3.85	3.85E-03	-2.41E+00	-2.04E+00	7.24E+03
	270	1.12E-01												1.12E-01		2.52E-02		3.70	3.70E-03	-2.43E+00	-1.60E+00		1.01
	280	2.75E-01												2.75E-01		6.53E-02		3.57	3.57E-03	-2.45E+00	-1.18E+00		6.62E-02
	290	6.36E-01												6.36E-01		1.59E-01		3.45	3.45E-03	-2.46E+00	-7.99E-01	-8.56E-01
	298	1.19E+00												1.19E+00		3.10E-01		3.36	3.36E-03	-2.47E+00	-5.09E-01	-3.03E+03
	310	2.90E+00												2.90E+00		7.91E-01		3.23	3.23E-03	-2.49E+00	-1.02E-01	7.53E+00
	320	5.76E+00												5.76E+00		1.64E+00		3.13	3.13E-03	-2.51E+00	2.15E-01	#N/A
	330	1.10E+01												1.10E+01		3.25E+00		3.03	3.03E-03	-2.52E+00	5.12E-01	#N/A
	340	2.02E+01												2.02E+01		6.19E+00		2.94	2.94E-03	-2.53E+00	7.92E-01	A	6.21E+00
	350	3.59E+01												3.59E+01		1.14E+01		2.86	2.86E-03	-2.54E+00	1.06E+00	3.41E+07	1.00
	375	1.32E+02												1.32E+02		4.53E+01		2.67	2.67E-03	-2.57E+00	1.66E+00	n
	400	4.15E+02												4.15E+02		1.52E+02		2.50	2.50E-03	-2.60E+00	2.18E+00	0.86
	463	4.45E+03	6.73E+02											4.45E+03		1.87E+03		2.16	2.16E-03	-2.67E+00	3.27E+00	Ea	0.98
	523	2.58E+04	5.54E+03											2.58E+04	1.20E+04	1.20E+04		1.91	1.91E-03	-2.72E+00	4.08E+00	6972	1.17E+04
	P1	9.10E+10	7.73E+10					2.51E-01
	P2	8688	9144.2					3.42E+00								Ea shift
	P3	7.55E+07	7.59E+07					5577.02124658773								3.20E+02
>CHOO. | >CH-	T	Praske et al. 2018	Praske et al. 2018	Praske et al. 2018	Praske et al. 2018	Jorand et al. 2003	Praske et al. 2018 (exp)	Vereecken 2019						T-dependence	Target	Final		1000/T	1/T	log(1/T)	log(>CHOO. | >CH-)	log(T)	Replicate
	200							1.46E-05						1.46E-05		2.95E-06		5.00	5.00E-03	-2.30E+00	-5.53E+00	A	2.31E-06
	225							4.85E-04						4.85E-04		1.17E-04		4.44	4.44E-03	-2.35E+00	-3.93E+00	2.58E+09	0.78
	250							8.30E-03						8.30E-03		2.31E-03		4.00	4.00E-03	-2.40E+00	-2.64E+00	Ea
	260							2.24E-02						2.24E-02		6.53E-03		3.85	3.85E-03	-2.41E+00	-2.18E+00	6.93E+03
	270							5.64E-02						5.64E-02		1.72E-02		3.70	3.70E-03	-2.43E+00	-1.76E+00		1.08
	280							1.34E-01						1.34E-01		4.25E-02		3.57	3.57E-03	-2.45E+00	-1.37E+00		4.60E-02
	290	1.96E-01	3.51E-02					2.99E-01						2.99E-01		9.92E-02		3.45	3.45E-03	-2.46E+00	-1.00E+00	-3.39E+00
	298	3.44E-01	6.42E-02				0.102761860629321	5.51E-01						5.51E-01	1.88E-01	1.88E-01		3.36	3.36E-03	-2.47E+00	-7.26E-01	-2.56E+03
	310	7.73E-01	1.53E-01					1.30E+00						1.30E+00		4.63E-01		3.23	3.23E-03	-2.49E+00	-3.35E-01	-5.19E-01
	320	1.47E+00	3.05E-01				0.414716770820762	2.54E+00						2.54E+00		9.35E-01		3.13	3.13E-03	-2.51E+00	-2.92E-02	#N/A
	330							4.79E+00						4.79E+00		1.82E+00		3.03	3.03E-03	-2.52E+00	2.59E-01	#N/A
	340							8.73E+00						8.73E+00		3.40E+00		2.94	2.94E-03	-2.53E+00	5.32E-01	A	3.40E+00
	350							1.54E+01						1.54E+01		6.17E+00		2.86	2.86E-03	-2.54E+00	7.90E-01	3.03E-01	1.00
	375							5.64E+01						5.64E+01		2.40E+01		2.67	2.67E-03	-2.57E+00	1.38E+00	n
	400							1.78E+02						1.78E+02		8.00E+01		2.50	2.50E-03	-2.60E+00	1.90E+00	3.39
	453			8.60E+02	2.50E+02	2.50E+03		1.39E+03						1.39E+03		6.87E+02		2.21	2.21E-03	-2.66E+00	2.84E+00	Ea	1.00
	483			2.40E+03	7.40E+02	6.70E+03		3.71E+03						3.71E+03		1.91E+03		2.07	2.07E-03	-2.68E+00	3.28E+00	5905	1.92E+03
	P1
	P2															Ea shift
	P3															1.30E+03
>C(OO.)- | -CH2-	T													T-dependence	Target	Final		1000/T	1/T	log(1/T)	log(>C(OO.)- | -CH2-)	log(T)	Replicate
	200													3.89E-06		5.83E-09		5.00	5.00E-03	-2.30E+00	-8.23E+00	A	4.59E-09
	225													1.74E-04		5.36E-07		4.44	4.44E-03	-2.35E+00	-6.27E+00	1.05E+10	0.79
	250													3.79E-03		2.08E-05		4.00	4.00E-03	-2.40E+00	-4.68E+00	Ea
	260													1.11E-02		7.47E-05		3.85	3.85E-03	-2.41E+00	-4.13E+00	8.45E+03
	270													3.03E-02		2.45E-04		3.70	3.70E-03	-2.43E+00	-3.61E+00		1.09
	280													7.73E-02		7.43E-04		3.57	3.57E-03	-2.45E+00	-3.13E+00		8.07E-04
	290													1.86E-01		2.09E-03		3.45	3.45E-03	-2.46E+00	-2.68E+00	-3.81E+00
	298													3.60E-01	4.58E-03	4.58E-03		3.36	3.36E-03	-2.47E+00	-2.34E+00	-3.18E+03
	310													9.16E-01		1.38E-02		3.23	3.23E-03	-2.49E+00	-1.86E+00	-1.09E+00
	320													1.90E+00		3.26E-02		3.13	3.13E-03	-2.51E+00	-1.49E+00	#N/A
	330													3.78E+00		7.34E-02		3.03	3.03E-03	-2.52E+00	-1.13E+00	#N/A
	340													7.25E+00		1.58E-01		2.94	2.94E-03	-2.53E+00	-8.01E-01	A	1.58E-01
	350													1.34E+01		3.27E-01		2.86	2.86E-03	-2.54E+00	-4.86E-01	8.05E-02	1.00
	375													5.52E+01		1.72E+00		2.67	2.67E-03	-2.57E+00	2.35E-01	n
	400													1.93E+02		7.46E+00		2.50	2.50E-03	-2.60E+00	8.73E-01	3.81
	425													5.90E+02		2.76E+01		2.35	2.35E-03	-2.63E+00	1.44E+00	Ea	1.00
	450													1.61E+03		8.96E+01		2.22	2.22E-03	-2.65E+00	1.95E+00	7330	8.96E+01
	P1
	P2															Ea shift
	P3													average		5.13E-01
>C(OO.)- | >CH-	T													T-dependence	Target	Final		1000/T	1/T	log(1/T)	log(>C(OO.)- | >CH-)	log(T)	Replicate
	200													3.89E-06		3.88E-06		5.00	5.00E-03	-2.30E+00	-5.41E+00	A	3.06E-06
	225													1.74E-04		1.73E-04		4.44	4.44E-03	-2.35E+00	-3.76E+00	1.05E+10	0.79
	250													3.79E-03		3.78E-03		4.00	4.00E-03	-2.40E+00	-2.42E+00	Ea
	260													1.11E-02		1.11E-02		3.85	3.85E-03	-2.41E+00	-1.95E+00	7.15E+03
	270													3.03E-02		3.03E-02		3.70	3.70E-03	-2.43E+00	-1.52E+00		1.09
	280													7.73E-02		7.72E-02		3.57	3.57E-03	-2.45E+00	-1.11E+00		8.39E-02
	290													1.86E-01		1.85E-01		3.45	3.45E-03	-2.46E+00	-7.32E-01	-3.81E+00
	298													3.60E-01	3.60E-01	3.60E-01		3.36	3.36E-03	-2.47E+00	-4.44E-01	-2.62E+03
	310													9.16E-01		9.15E-01		3.23	3.23E-03	-2.49E+00	-3.87E-02	-1.09E+00
	320													1.90E+00		1.90E+00		3.13	3.13E-03	-2.51E+00	2.78E-01	#N/A
	330													3.78E+00		3.77E+00		3.03	3.03E-03	-2.52E+00	5.77E-01	#N/A
	340													7.25E+00		7.24E+00		2.94	2.94E-03	-2.53E+00	8.60E-01	A	7.24E+00
	350													1.34E+01		1.34E+01		2.86	2.86E-03	-2.54E+00	1.13E+00	8.05E-02	1.00
	375													5.52E+01		5.51E+01		2.67	2.67E-03	-2.57E+00	1.74E+00	n
	400													1.93E+02		1.92E+02		2.50	2.50E-03	-2.60E+00	2.28E+00	3.81
	425													5.90E+02		5.89E+02		2.35	2.35E-03	-2.63E+00	2.77E+00	Ea	1.00
	450													1.61E+03		1.61E+03		2.22	2.22E-03	-2.65E+00	3.21E+00	6030	1.61E+03
1,7 Hshift
	P1
	P2															Ea shift
	P3													average		1.87E+03
-CH2OO. | -CH2-	T													T-dependence	Target	Final		1000/T	1/T	log(1/T)	log(-CH2OO. | -CH2-)	log(T)	Replicate
	200													3.89E-06		3.44E-10		5.00	5.00E-03	-2.30E+00	-9.46E+00	A	2.71E-10
	225													1.74E-04		4.33E-08		4.44	4.44E-03	-2.35E+00	-7.36E+00	1.05E+10	0.79
	250													3.79E-03		2.17E-06		4.00	4.00E-03	-2.40E+00	-5.66E+00	Ea
	260													1.11E-02		8.48E-06		3.85	3.85E-03	-2.41E+00	-5.07E+00	9.02E+03
	270													3.03E-02		3.01E-05		3.70	3.70E-03	-2.43E+00	-4.52E+00		1.09
	280													7.73E-02		9.84E-05		3.57	3.57E-03	-2.45E+00	-4.01E+00		1.07E-04
	290													1.86E-01		2.98E-04		3.45	3.45E-03	-2.46E+00	-3.53E+00	-3.81E+00
	298													3.60E-01	6.86E-04	6.86E-04		3.36	3.36E-03	-2.47E+00	-3.16E+00	-3.43E+03
	310													9.16E-01		2.22E-03		3.23	3.23E-03	-2.49E+00	-2.65E+00	-1.09E+00
	320													1.90E+00		5.56E-03		3.13	3.13E-03	-2.51E+00	-2.25E+00	#N/A
	330													3.78E+00		1.32E-02		3.03	3.03E-03	-2.52E+00	-1.88E+00	#N/A
	340													7.25E+00		2.99E-02		2.94	2.94E-03	-2.53E+00	-1.52E+00	A	2.99E-02
	350													1.34E+01		6.49E-02		2.86	2.86E-03	-2.54E+00	-1.19E+00	8.05E-02	1.00
	375													5.52E+01		3.80E-01		2.67	2.67E-03	-2.57E+00	-4.20E-01	n
	400													1.93E+02		1.81E+00		2.50	2.50E-03	-2.60E+00	2.58E-01	3.81
	425													5.90E+02		7.29E+00		2.35	2.35E-03	-2.63E+00	8.63E-01	Ea	1.00
	450													1.61E+03		2.55E+01		2.22	2.22E-03	-2.65E+00	1.41E+00	7896	2.55E+01
	P1	5.09E+09	1.17E-01
	P2	8.19E+03	3.51E+00													Ea shift
	P3	7.28E+07	5782.47495915037											average		1.24E+02
-CH2OO. | >CH-	T	Otkjaer et al. 2018	Vereecken 2019 (rel)											T-dependence	Target	Final		1000/T	1/T	log(1/T)	log(-CH2OO. | >CH-)	log(T)	Replicate
	200		3.89E-06											3.89E-06		2.09E-06		5.00	5.00E-03	-2.30E+00	-5.68E+00	A	1.68E-06
	225		1.46E-04											1.46E-04		8.42E-05		4.44	4.44E-03	-2.35E+00	-4.07E+00	1.99E+09	0.80
	250		2.77E-03											2.77E-03		1.68E-03		4.00	4.00E-03	-2.40E+00	-2.77E+00	Ea
	260		7.73E-03											7.73E-03		4.79E-03		3.85	3.85E-03	-2.41E+00	-2.32E+00	6.94E+03
	270		2.01E-02											2.01E-02		1.27E-02		3.70	3.70E-03	-2.43E+00	-1.90E+00		1.08
	280		4.91E-02											4.91E-02		3.15E-02		3.57	3.57E-03	-2.45E+00	-1.50E+00		3.40E-02
	290	5.47E-02	1.13E-01											1.13E-01		7.37E-02		3.45	3.45E-03	-2.46E+00	-1.13E+00	-3.51E+00
	298	9.24E-02	2.13E-01											2.13E-01	1.40E-01	1.40E-01		3.36	3.36E-03	-2.47E+00	-8.53E-01	-2.57E+03
	310	1.97E-01	5.18E-01											5.18E-01		3.47E-01		3.23	3.23E-03	-2.49E+00	-4.60E-01	-9.32E-01
	320	3.60E-01	1.04E+00											1.04E+00		7.03E-01		3.13	3.13E-03	-2.51E+00	-1.53E-01	#N/A
	330		2.00E+00											2.00E+00		1.37E+00		3.03	3.03E-03	-2.52E+00	1.37E-01	#N/A
	340		3.71E+00											3.71E+00		2.58E+00		2.94	2.94E-03	-2.53E+00	4.11E-01	A	2.58E+00
	350		6.68E+00											6.68E+00		4.69E+00		2.86	2.86E-03	-2.54E+00	6.71E-01	1.17E-01	1.00
	375		2.56E+01											2.56E+01		1.84E+01		2.67	2.67E-03	-2.57E+00	1.26E+00	n
	400		8.43E+01											8.43E+01		6.18E+01		2.50	2.50E-03	-2.60E+00	1.79E+00	3.51
	425		2.44E+02											2.44E+02		1.82E+02		2.35	2.35E-03	-2.63E+00	2.26E+00	Ea	1.00
	450		6.35E+02											6.35E+02		4.82E+02		2.22	2.22E-03	-2.65E+00	2.68E+00	5907	4.82E+02
	P1
	P2															Ea shift
	P3													average		2.33E+03
>CHOO. | -CH2-	T													T-dependence	Target	Final		1000/T	1/T	log(1/T)	log(>CHOO. | -CH2-)	log(T)	Replicate
	200													3.89E-06		3.43E-11		5.00	5.00E-03	-2.30E+00	-1.05E+01	A	2.70E-11
	225													1.74E-04		5.58E-09		4.44	4.44E-03	-2.35E+00	-8.25E+00	1.05E+10	0.79
	250													3.79E-03		3.42E-07		4.00	4.00E-03	-2.40E+00	-6.47E+00	Ea
	260													1.11E-02		1.44E-06		3.85	3.85E-03	-2.41E+00	-5.84E+00	9.48E+03
	270													3.03E-02		5.46E-06		3.70	3.70E-03	-2.43E+00	-5.26E+00		1.09
	280													7.73E-02		1.90E-05		3.57	3.57E-03	-2.45E+00	-4.72E+00		2.06E-05
	290													1.86E-01		6.07E-05		3.45	3.45E-03	-2.46E+00	-4.22E+00	-3.81E+00
	298													3.60E-01	1.46E-04	1.46E-04		3.36	3.36E-03	-2.47E+00	-3.84E+00	-3.63E+03
	310													9.16E-01		5.02E-04		3.23	3.23E-03	-2.49E+00	-3.30E+00	-1.09E+00
	320													1.90E+00		1.32E-03		3.13	3.13E-03	-2.51E+00	-2.88E+00	#N/A
	330													3.78E+00		3.27E-03		3.03	3.03E-03	-2.52E+00	-2.49E+00	#N/A
	340													7.25E+00		7.71E-03		2.94	2.94E-03	-2.53E+00	-2.11E+00	A	7.71E-03
	350													1.34E+01		1.74E-02		2.86	2.86E-03	-2.54E+00	-1.76E+00	8.05E-02	1.00
	375													5.52E+01		1.11E-01		2.67	2.67E-03	-2.57E+00	-9.54E-01	n
	400													1.93E+02		5.72E-01		2.50	2.50E-03	-2.60E+00	-2.42E-01	3.81
	425													5.90E+02		2.46E+00		2.35	2.35E-03	-2.63E+00	3.92E-01	Ea	1.00
	450													1.61E+03		9.14E+00		2.22	2.22E-03	-2.65E+00	9.61E-01	8358	9.14E+00
	P1
	P2															Ea shift
	P3													average		9.90E+02
>CHOO. | >CH-	T													T-dependence	Target	Final		1000/T	1/T	log(1/T)	log(>CHOO. | >CH-)	log(T)	Replicate
	200													3.89E-06		2.76E-08		5.00	5.00E-03	-2.30E+00	-7.56E+00	A	2.18E-08
	225													1.74E-04		2.14E-06		4.44	4.44E-03	-2.35E+00	-5.67E+00	1.05E+10	0.79
	250													3.79E-03		7.23E-05		4.00	4.00E-03	-2.40E+00	-4.14E+00	Ea
	260													1.11E-02		2.47E-04		3.85	3.85E-03	-2.41E+00	-3.61E+00	8.14E+03
	270													3.03E-02		7.76E-04		3.70	3.70E-03	-2.43E+00	-3.11E+00		1.09
	280													7.73E-02		2.26E-03		3.57	3.57E-03	-2.45E+00	-2.65E+00		2.45E-03
	290													1.86E-01		6.12E-03		3.45	3.45E-03	-2.46E+00	-2.21E+00	-3.81E+00
	298													3.60E-01	1.30E-02	1.30E-02		3.36	3.36E-03	-2.47E+00	-1.89E+00	-3.05E+03
	310													9.16E-01		3.76E-02		3.23	3.23E-03	-2.49E+00	-1.42E+00	-1.09E+00
	320													1.90E+00		8.62E-02		3.13	3.13E-03	-2.51E+00	-1.06E+00	#N/A
	330													3.78E+00		1.88E-01		3.03	3.03E-03	-2.52E+00	-7.25E-01	#N/A
	340													7.25E+00		3.95E-01		2.94	2.94E-03	-2.53E+00	-4.04E-01	A	3.95E-01
	350													1.34E+01		7.95E-01		2.86	2.86E-03	-2.54E+00	-9.94E-02	8.05E-02	1.00
	375													5.52E+01		3.94E+00		2.67	2.67E-03	-2.57E+00	5.96E-01	n
	400													1.93E+02		1.62E+01		2.50	2.50E-03	-2.60E+00	1.21E+00	3.81
	425													5.90E+02		5.75E+01		2.35	2.35E-03	-2.63E+00	1.76E+00	Ea	1.00
	450													1.61E+03		1.79E+02		2.22	2.22E-03	-2.65E+00	2.25E+00	7019	1.79E+02
	P1
	P2															Ea shift
	P3													average		2.77E+03
>C(OO.)- | -CH2-	T													T-dependence	Target	Final		1000/T	1/T	log(1/T)	log(>C(OO.)- | -CH2-)	log(T)	Replicate
	200													3.89E-06		3.68E-12		5.00	5.00E-03	-2.30E+00	-1.14E+01	A	2.90E-12
	225													1.74E-04		7.68E-10		4.44	4.44E-03	-2.35E+00	-9.11E+00	1.05E+10	0.79
	250													3.79E-03		5.75E-08		4.00	4.00E-03	-2.40E+00	-7.24E+00	Ea
	260													1.11E-02		2.59E-07		3.85	3.85E-03	-2.41E+00	-6.59E+00	9.93E+03
	270													3.03E-02		1.05E-06		3.70	3.70E-03	-2.43E+00	-5.98E+00		1.09
	280													7.73E-02		3.85E-06		3.57	3.57E-03	-2.45E+00	-5.41E+00		4.19E-06
	290													1.86E-01		1.30E-05		3.45	3.45E-03	-2.46E+00	-4.89E+00	-3.81E+00
	298													3.60E-01	3.26E-05	3.26E-05		3.36	3.36E-03	-2.47E+00	-4.49E+00	-3.82E+03
	310													9.16E-01		1.19E-04		3.23	3.23E-03	-2.49E+00	-3.92E+00	-1.09E+00
	320													1.90E+00		3.26E-04		3.13	3.13E-03	-2.51E+00	-3.49E+00	#N/A
	330													3.78E+00		8.45E-04		3.03	3.03E-03	-2.52E+00	-3.07E+00	#N/A
	340													7.25E+00		2.08E-03		2.94	2.94E-03	-2.53E+00	-2.68E+00	A	2.08E-03
	350													1.34E+01		4.86E-03		2.86	2.86E-03	-2.54E+00	-2.31E+00	8.05E-02	1.00
	375													5.52E+01		3.38E-02		2.67	2.67E-03	-2.57E+00	-1.47E+00	n
	400													1.93E+02		1.88E-01		2.50	2.50E-03	-2.60E+00	-7.27E-01	3.81
	425													5.90E+02		8.63E-01		2.35	2.35E-03	-2.63E+00	-6.42E-02	Ea	1.00
	450													1.61E+03		3.39E+00		2.22	2.22E-03	-2.65E+00	5.30E-01	8804	3.39E+00
	P1
	P2															Ea shift
	P3													average		1.49E+03
>C(OO.)- | >CH-	T													T-dependence	Target	Final		1000/T	1/T	log(1/T)	log(>C(OO.)- | >CH-)	log(T)	Replicate
	200													3.89E-06		2.31E-09		5.00	5.00E-03	-2.30E+00	-8.64E+00	A	1.82E-09
	225													1.74E-04		2.36E-07		4.44	4.44E-03	-2.35E+00	-6.63E+00	1.05E+10	0.79
	250													3.79E-03		9.95E-06		4.00	4.00E-03	-2.40E+00	-5.00E+00	Ea
	260													1.11E-02		3.67E-05		3.85	3.85E-03	-2.41E+00	-4.44E+00	8.64E+03
	270													3.03E-02		1.24E-04		3.70	3.70E-03	-2.43E+00	-3.91E+00		1.09
	280													7.73E-02		3.84E-04		3.57	3.57E-03	-2.45E+00	-3.42E+00		4.17E-04
	290													1.86E-01		1.11E-03		3.45	3.45E-03	-2.46E+00	-2.96E+00	-3.81E+00
	298													3.60E-01	2.46E-03	2.46E-03		3.36	3.36E-03	-2.47E+00	-2.61E+00	-3.26E+03
	310													9.16E-01		7.60E-03		3.23	3.23E-03	-2.49E+00	-2.12E+00	-1.09E+00
	320													1.90E+00		1.83E-02		3.13	3.13E-03	-2.51E+00	-1.74E+00	#N/A
	330													3.78E+00		4.19E-02		3.03	3.03E-03	-2.52E+00	-1.38E+00	#N/A
	340													7.25E+00		9.18E-02		2.94	2.94E-03	-2.53E+00	-1.04E+00	A	9.18E-02
	350													1.34E+01		1.93E-01		2.86	2.86E-03	-2.54E+00	-7.15E-01	8.05E-02	1.00
	375													5.52E+01		1.05E+00		2.67	2.67E-03	-2.57E+00	2.11E-02	n
	400													1.93E+02		4.70E+00		2.50	2.50E-03	-2.60E+00	6.72E-01	3.81
	425													5.90E+02		1.79E+01		2.35	2.35E-03	-2.63E+00	1.25E+00	Ea	1.00
	450													1.61E+03		5.94E+01		2.22	2.22E-03	-2.65E+00	1.77E+00	7515	5.94E+01

## Sheet: Plot Aldehyde
RO2 migration of aldehydic hydrogen atoms
1,4 Hshift
	Average temperature dependence
																Ea shift
																0.00E+00
	T	Vereecken 2019 st acrolein)	Vereecken 2019 tt (methacrolein)											T-dependence	Target	Final		1000/T	1/T	log(1/T)	log()	log(T)	Replicate
	200	1.94E-05	6.39E-05											3.52E-05		3.52E-05		5.00	5.00E-03	-2.30E+00	-4.45E+00	A	7.49E-06
	225	1.68E-04	5.74E-04											3.10E-04		3.10E-04		4.44	4.44E-03	-2.35E+00	-3.51E+00	6.57E+07	0.21
	250	1.25E-03	4.35E-03											2.33E-03		2.33E-03		4.00	4.00E-03	-2.40E+00	-2.63E+00	Ea
	260	2.67E-03	9.37E-03											5.00E-03		5.00E-03		3.85	3.85E-03	-2.41E+00	-2.30E+00	5.96E+03
	270	5.62E-03	1.98E-02											1.05E-02		1.05E-02		3.70	3.70E-03	-2.43E+00	-1.98E+00		1.72
	280	1.16E-02	4.08E-02											2.17E-02		2.17E-02		3.57	3.57E-03	-2.45E+00	-1.66E+00		3.74E-02
	290	2.34E-02	8.24E-02											4.39E-02		4.39E-02		3.45	3.45E-03	-2.46E+00	-1.36E+00	-2.47E+01
	298	4.06E-02	1.43E-01											7.62E-02	7.62E-02	7.62E-02		3.36	3.36E-03	-2.47E+00	-1.12E+00	5.78E+02
	310	9.09E-02	3.19E-01											1.70E-01		1.70E-01		3.23	3.23E-03	-2.49E+00	-7.69E-01	-6.43E+01
	320	1.75E-01	6.10E-01											3.26E-01		3.26E-01		3.13	3.13E-03	-2.51E+00	-4.86E-01	#N/A
	330	3.30E-01	1.15E+00											6.16E-01		6.16E-01		3.03	3.03E-03	-2.52E+00	-2.10E-01	#N/A
	340	6.15E-01	2.13E+00											1.15E+00		1.15E+00		2.94	2.94E-03	-2.53E+00	5.90E-02	A	1.15E+00
	350	1.13E+00	3.90E+00											2.10E+00		2.10E+00		2.86	2.86E-03	-2.54E+00	3.22E-01	5.24E-65	1.00
	375	4.87E+00	1.66E+01											8.98E+00		8.98E+00		2.67	2.67E-03	-2.57E+00	9.53E-01	n
	400	1.94E+01	6.49E+01											3.55E+01		3.55E+01		2.50	2.50E-03	-2.60E+00	1.55E+00	24.74
	425	7.23E+01	2.37E+02											1.31E+02		1.31E+02		2.35	2.35E-03	-2.63E+00	2.12E+00	Ea	1.00
	450	2.52E+02	8.11E+02											4.52E+02		4.52E+02		2.22	2.22E-03	-2.65E+00	2.66E+00	-1331	4.52E+02
	P1
	P2															Ea shift
	P3															-1.05E+03
-CH2OO. | >CH-	T													T-dependence	Target	Final		1000/T	1/T	log(1/T)	log(-CH2OO. | >CH-)	log(T)	Replicate
	200													3.52E-05		6.64E-03		5.00	5.00E-03	-2.30E+00	-2.18E+00	A	1.41E-03
	225													3.10E-04		3.27E-02		4.44	4.44E-03	-2.35E+00	-1.49E+00	6.57E+07	0.21
	250													2.33E-03		1.54E-01		4.00	4.00E-03	-2.40E+00	-8.13E-01	Ea
	260													5.00E-03		2.82E-01		3.85	3.85E-03	-2.41E+00	-5.50E-01	4.91E+03
	270													1.05E-02		5.11E-01		3.70	3.70E-03	-2.43E+00	-2.92E-01		1.72
	280													2.17E-02		9.17E-01		3.57	3.57E-03	-2.45E+00	-3.78E-02		1.58E+00
	290													4.39E-02		1.63E+00		3.45	3.45E-03	-2.46E+00	2.12E-01	-2.47E+01
	298													7.62E-02	2.56E+00	2.56E+00		3.36	3.36E-03	-2.47E+00	4.09E-01	1.03E+03
	310													1.70E-01		5.00E+00		3.23	3.23E-03	-2.49E+00	6.99E-01	-6.43E+01
	320													3.26E-01		8.63E+00		3.13	3.13E-03	-2.51E+00	9.36E-01	#N/A
	330													6.16E-01		1.47E+01		3.03	3.03E-03	-2.52E+00	1.17E+00	#N/A
	340													1.15E+00		2.50E+01		2.94	2.94E-03	-2.53E+00	1.40E+00	A	2.50E+01
	350													2.10E+00		4.19E+01		2.86	2.86E-03	-2.54E+00	1.62E+00	5.24E-65	1.00
	375													8.98E+00		1.47E+02		2.67	2.67E-03	-2.57E+00	2.17E+00	n
	400													3.55E+01		4.88E+02		2.50	2.50E-03	-2.60E+00	2.69E+00	24.74
	425													1.31E+02		1.54E+03		2.35	2.35E-03	-2.63E+00	3.19E+00	Ea	1.00
	450													4.52E+02		4.64E+03		2.22	2.22E-03	-2.65E+00	3.67E+00	-2379	4.64E+03
	P1	1.08E-66	1.26E-04
	P2	2.52E+01	4.782													Ea shift
	P3	-1469.76603923336	6104.68042274786													-1.46E+02
>CHOO. | >CH-	T	Vereecken 2019 (acrolein)	da Silva 2011 (2-hydroxy-ethanal-2-peroxy)											T-dependence	Target	Final		1000/T	1/T	log(1/T)	log(>CHOO. | >CH-)	log(T)	Replicate
	200	1.94E-05	7.04E-07											1.94E-05		4.04E-05		5.00	5.00E-03	-2.30E+00	-4.39E+00	A	8.32E-06
	225	1.68E-04	3.68E-05											1.68E-04		3.21E-04		4.44	4.44E-03	-2.35E+00	-3.49E+00	3.61E+07	0.21
	250	1.25E-03	9.17E-04											1.25E-03		2.24E-03		4.00	4.00E-03	-2.40E+00	-2.65E+00	Ea
	260	2.67E-03	2.83E-03											2.67E-03		4.69E-03		3.85	3.85E-03	-2.41E+00	-2.33E+00	5.82E+03
	270	5.62E-03	8.09E-03											5.62E-03		9.66E-03		3.70	3.70E-03	-2.43E+00	-2.02E+00		1.74
	280	1.16E-02	2.16E-02											1.16E-02		1.95E-02		3.57	3.57E-03	-2.45E+00	-1.71E+00		3.39E-02
	290	2.34E-02	5.41E-02											2.34E-02		3.88E-02		3.45	3.45E-03	-2.46E+00	-1.41E+00	-2.52E+01
	298	4.06E-02	1.08E-01											4.06E-02	6.64E-02	6.64E-02		3.36	3.36E-03	-2.47E+00	-1.18E+00	7.02E+02
	310	9.09E-02	2.90E-01											9.09E-02		1.46E-01		3.23	3.23E-03	-2.49E+00	-8.36E-01	-6.60E+01
	320	1.75E-01	6.24E-01											1.75E-01		2.76E-01		3.13	3.13E-03	-2.51E+00	-5.59E-01	#N/A
	330	3.30E-01	1.29E+00											3.30E-01		5.15E-01		3.03	3.03E-03	-2.52E+00	-2.89E-01	#N/A
	340	6.15E-01	2.56E+00											6.15E-01		9.46E-01		2.94	2.94E-03	-2.53E+00	-2.40E-02	A	9.46E-01
	350	1.13E+00	4.91E+00											1.13E+00		1.72E+00		2.86	2.86E-03	-2.54E+00	2.35E-01	1.08E-66	1.00
	375	4.87E+00	2.18E+01											4.87E+00		7.20E+00		2.67	2.67E-03	-2.57E+00	8.57E-01	n
	400	1.94E+01	8.23E+01											1.94E+01		2.80E+01		2.50	2.50E-03	-2.60E+00	1.45E+00	25.23
	425	7.23E+01	2.70E+02											7.23E+01		1.02E+02		2.35	2.35E-03	-2.63E+00	2.01E+00	Ea	1.00
	450	2.52E+02	7.88E+02											2.52E+02		3.49E+02		2.22	2.22E-03	-2.65E+00	2.54E+00	-1616	3.49E+02
	P1	2.54E-63
	P2	2.43E+01														Ea shift
	P3	-1192.62404515306														-4.12E+02
>C(OO.)- | >CH-	T	Vereecken 2019 (methacrolein)	Crounse et al. 2012 (methacrolein)	Møller et al. 2016 (methacrolein)										T-dependence	Target	Final		1000/T	1/T	log(1/T)	log(>C(OO.)- | >CH-)	log(T)	Replicate
	200	6.39E-05												6.39E-05		5.03E-04		5.00	5.00E-03	-2.30E+00	-3.30E+00	A	1.10E-04
	225	5.74E-04												5.74E-04		3.59E-03		4.44	4.44E-03	-2.35E+00	-2.45E+00	1.19E+08	0.22
	250	4.35E-03												4.35E-03		2.26E-02		4.00	4.00E-03	-2.40E+00	-1.65E+00	Ea
	260	9.37E-03												9.37E-03		4.58E-02		3.85	3.85E-03	-2.41E+00	-1.34E+00	5.54E+03
	270	1.98E-02												1.98E-02		9.10E-02		3.70	3.70E-03	-2.43E+00	-1.04E+00		1.70
	280	4.08E-02												4.08E-02		1.78E-01		3.57	3.57E-03	-2.45E+00	-7.50E-01		3.03E-01
	290	8.24E-02												8.24E-02		3.42E-01		3.45	3.45E-03	-2.46E+00	-4.66E-01	-2.43E+01
	298	1.43E-01	5.70E-01	4.80E-01										1.43E-01	5.70E-01	5.70E-01		3.36	3.36E-03	-2.47E+00	-2.44E-01	6.97E+02
	310	3.19E-01												3.19E-01		1.21E+00		3.23	3.23E-03	-2.49E+00	8.12E-02	-6.26E+01
	320	6.10E-01												6.10E-01		2.21E+00		3.13	3.13E-03	-2.51E+00	3.45E-01	#N/A
	330	1.15E+00												1.15E+00		4.01E+00		3.03	3.03E-03	-2.52E+00	6.03E-01	#N/A
	340	2.13E+00												2.13E+00		7.17E+00		2.94	2.94E-03	-2.53E+00	8.56E-01	A	7.17E+00
	350	3.90E+00												3.90E+00		1.27E+01		2.86	2.86E-03	-2.54E+00	1.10E+00	2.54E-63	1.00
	375	1.66E+01												1.66E+01		4.97E+01		2.67	2.67E-03	-2.57E+00	1.70E+00	n
	400	6.49E+01												6.49E+01		1.82E+02		2.50	2.50E-03	-2.60E+00	2.26E+00	24.25
	425	2.37E+02												2.37E+02		6.26E+02		2.35	2.35E-03	-2.63E+00	2.80E+00	Ea	1.00
	450	8.11E+02												8.11E+02		2.03E+03		2.22	2.22E-03	-2.65E+00	3.31E+00	-1605	2.03E+03
1,5 Hshift
	Average temperature dependence
																Ea shift
																0.00E+00
	T	-CH2OO. | >CH-												T-dependence	Target	Final		1000/T	1/T	log(1/T)	log()	log(T)	Replicate
	200	8.02E-03												8.02E-03		8.02E-03		5.00	5.00E-03	-2.30E+00	-2.10E+00	A	3.05E-03
	225	6.81E-02												6.81E-02		6.81E-02		4.44	4.44E-03	-2.35E+00	-1.17E+00	4.21E+08	0.38
	250	4.48E-01												4.48E-01		4.48E-01		4.00	4.00E-03	-2.40E+00	-3.48E-01	Ea
	260	8.98E-01												8.98E-01		8.98E-01		3.85	3.85E-03	-2.41E+00	-4.66E-02	5.13E+03
	270	1.75E+00												1.75E+00		1.75E+00		3.70	3.70E-03	-2.43E+00	2.42E-01		1.40
	280	3.31E+00												3.31E+00		3.31E+00		3.57	3.57E-03	-2.45E+00	5.20E-01		4.64E+00
	290	6.11E+00												6.11E+00		6.11E+00		3.45	3.45E-03	-2.46E+00	7.86E-01	-1.55E+01
	298	9.81E+00												9.81E+00	9.81E+00	9.81E+00		3.36	3.36E-03	-2.47E+00	9.92E-01	-2.49E+02
	310	1.95E+01												1.95E+01		1.95E+01		3.23	3.23E-03	-2.49E+00	1.29E+00	-3.64E+01
	320	3.37E+01												3.37E+01		3.37E+01		3.13	3.13E-03	-2.51E+00	1.53E+00	#N/A
	330	5.72E+01												5.72E+01		5.72E+01		3.03	3.03E-03	-2.52E+00	1.76E+00	#N/A
	340	9.56E+01												9.56E+01		9.56E+01		2.94	2.94E-03	-2.53E+00	1.98E+00	A	9.56E+01
	350	1.57E+02												1.57E+02		1.57E+02		2.86	2.86E-03	-2.54E+00	2.20E+00	3.66E-37	1.00
	375	5.09E+02												5.09E+02		5.09E+02		2.67	2.67E-03	-2.57E+00	2.71E+00	n
	400	1.52E+03												1.52E+03		1.52E+03		2.50	2.50E-03	-2.60E+00	3.18E+00	15.46
	425	4.22E+03												4.22E+03		4.22E+03		2.35	2.35E-03	-2.63E+00	3.63E+00	Ea	1.00
	450	1.10E+04												1.10E+04		1.10E+04		2.22	2.22E-03	-2.65E+00	4.04E+00	573	1.10E+04
	P1	3.66E-37
	P2	1.55E+01														Ea shift
	P3	5.73E+02														0.00E+00
-CH2OO. | >CH-	T	Vereecken 2019												T-dependence	Target	Final		1000/T	1/T	log(1/T)	log(-CH2OO. | >CH-)	log(T)	Replicate
	200	8.02E-03												8.02E-03		8.02E-03		5.00	5.00E-03	-2.30E+00	-2.10E+00	A	3.05E-03
	225	6.81E-02												6.81E-02		6.81E-02		4.44	4.44E-03	-2.35E+00	-1.17E+00	4.21E+08	0.38
	250	4.48E-01												4.48E-01		4.48E-01		4.00	4.00E-03	-2.40E+00	-3.48E-01	Ea
	260	8.98E-01												8.98E-01		8.98E-01		3.85	3.85E-03	-2.41E+00	-4.66E-02	5.13E+03
	270	1.75E+00												1.75E+00		1.75E+00		3.70	3.70E-03	-2.43E+00	2.42E-01		1.40
	280	3.31E+00												3.31E+00		3.31E+00		3.57	3.57E-03	-2.45E+00	5.20E-01		4.64E+00
	290	6.11E+00												6.11E+00		6.11E+00		3.45	3.45E-03	-2.46E+00	7.86E-01	-1.55E+01
	298	9.81E+00												9.81E+00	9.81E+00	9.81E+00		3.36	3.36E-03	-2.47E+00	9.92E-01	-2.49E+02
	310	1.95E+01												1.95E+01		1.95E+01		3.23	3.23E-03	-2.49E+00	1.29E+00	-3.64E+01
	320	3.37E+01												3.37E+01		3.37E+01		3.13	3.13E-03	-2.51E+00	1.53E+00	#N/A
	330	5.72E+01												5.72E+01		5.72E+01		3.03	3.03E-03	-2.52E+00	1.76E+00	#N/A
	340	9.56E+01												9.56E+01		9.56E+01		2.94	2.94E-03	-2.53E+00	1.98E+00	A	9.56E+01
	350	1.57E+02												1.57E+02		1.57E+02		2.86	2.86E-03	-2.54E+00	2.20E+00	3.66E-37	1.00
	375	5.09E+02												5.09E+02		5.09E+02		2.67	2.67E-03	-2.57E+00	2.71E+00	n
	400	1.52E+03												1.52E+03		1.52E+03		2.50	2.50E-03	-2.60E+00	3.18E+00	15.46
	425	4.22E+03												4.22E+03		4.22E+03		2.35	2.35E-03	-2.63E+00	3.63E+00	Ea	1.00
	450	1.10E+04												1.10E+04		1.10E+04		2.22	2.22E-03	-2.65E+00	4.04E+00	573	1.10E+04
	P1
	P2															Ea shift
	P3															-1.50E+02
>CHOO. | >CH-	T	Møller et al. 2016 (3-OH-propanal-3-peroxy)												T-dependence	Target	Final		1000/T	1/T	log(1/T)	log(>CHOO. | >CH-)	log(T)	Replicate
	200													8.02E-03		1.70E-02		5.00	5.00E-03	-2.30E+00	-1.77E+00	A	6.46E-03
	225													6.81E-02		1.33E-01		4.44	4.44E-03	-2.35E+00	-8.76E-01	4.21E+08	0.38
	250													4.48E-01		8.18E-01		4.00	4.00E-03	-2.40E+00	-8.71E-02	Ea
	260													8.98E-01		1.60E+00		3.85	3.85E-03	-2.41E+00	2.05E-01	4.98E+03
	270													1.75E+00		3.05E+00		3.70	3.70E-03	-2.43E+00	4.84E-01		1.40
	280													3.31E+00		5.66E+00		3.57	3.57E-03	-2.45E+00	7.53E-01		7.94E+00
	290													6.11E+00		1.03E+01		3.45	3.45E-03	-2.46E+00	1.01E+00	-1.55E+01
	298	1.92E-03												9.81E+00	1.62E+01	1.62E+01		3.36	3.36E-03	-2.47E+00	1.21E+00	-1.84E+02
	310													1.95E+01		3.16E+01		3.23	3.23E-03	-2.49E+00	1.50E+00	-3.64E+01
	320													3.37E+01		5.39E+01		3.13	3.13E-03	-2.51E+00	1.73E+00	#N/A
	330													5.72E+01		9.03E+01		3.03	3.03E-03	-2.52E+00	1.96E+00	#N/A
	340													9.56E+01		1.49E+02		2.94	2.94E-03	-2.53E+00	2.17E+00	A	1.49E+02
	350													1.57E+02		2.41E+02		2.86	2.86E-03	-2.54E+00	2.38E+00	3.66E-37	1.00
	375													5.09E+02		7.60E+02		2.67	2.67E-03	-2.57E+00	2.88E+00	n
	400													1.52E+03		2.21E+03		2.50	2.50E-03	-2.60E+00	3.34E+00	15.46
	425													4.22E+03		6.01E+03		2.35	2.35E-03	-2.63E+00	3.78E+00	Ea	1.00
	450													1.10E+04		1.54E+04		2.22	2.22E-03	-2.65E+00	4.19E+00	423	1.54E+04
	P1
	P2															Ea shift
	P3															1.20E+03
>C(OO.)- | >CH-	T													T-dependence	Target	Final		1000/T	1/T	log(1/T)	log(>C(OO.)- | >CH-)	log(T)	Replicate
	200													8.02E-03		1.97E-05		5.00	5.00E-03	-2.30E+00	-4.71E+00	A	7.47E-06
	225													6.81E-02		3.26E-04		4.44	4.44E-03	-2.35E+00	-3.49E+00	4.21E+08	0.38
	250													4.48E-01		3.66E-03		4.00	4.00E-03	-2.40E+00	-2.44E+00	Ea
	260													8.98E-01		8.82E-03		3.85	3.85E-03	-2.41E+00	-2.05E+00	6.33E+03
	270													1.75E+00		2.04E-02		3.70	3.70E-03	-2.43E+00	-1.69E+00		1.40
	280													3.31E+00		4.52E-02		3.57	3.57E-03	-2.45E+00	-1.34E+00		6.34E-02
	290													6.11E+00		9.68E-02		3.45	3.45E-03	-2.46E+00	-1.01E+00	-1.55E+01
	298													9.81E+00	1.74E-01	1.74E-01		3.36	3.36E-03	-2.47E+00	-7.60E-01	-7.71E+02
	310													1.95E+01		4.03E-01		3.23	3.23E-03	-2.49E+00	-3.95E-01	-3.64E+01
	320													3.37E+01		7.87E-01		3.13	3.13E-03	-2.51E+00	-1.04E-01	#N/A
	330													5.72E+01		1.50E+00		3.03	3.03E-03	-2.52E+00	1.76E-01	#N/A
	340													9.56E+01		2.79E+00		2.94	2.94E-03	-2.53E+00	4.45E-01	A	2.79E+00
	350													1.57E+02		5.06E+00		2.86	2.86E-03	-2.54E+00	7.04E-01	3.66E-37	1.00
	375													5.09E+02		2.06E+01		2.67	2.67E-03	-2.57E+00	1.31E+00	n
	400													1.52E+03		7.53E+01		2.50	2.50E-03	-2.60E+00	1.88E+00	15.46
	425													4.22E+03		2.50E+02		2.35	2.35E-03	-2.63E+00	2.40E+00	Ea	1.00
	450													1.10E+04		7.62E+02		2.22	2.22E-03	-2.65E+00	2.88E+00	1775	7.62E+02
1,6 Hshift
	Average temperature dependence
																Ea shift
																0.00E+00
	T	-CH2OO. | >CH-												T-dependence	Target	Final		1000/T	1/T	log(1/T)	log()	log(T)	Replicate
	200	5.22E-03												5.22E-03		5.22E-03		5.00	5.00E-03	-2.30E+00	-2.28E+00	A	1.83E-03
	225	3.99E-02												3.99E-02		3.99E-02		4.44	4.44E-03	-2.35E+00	-1.40E+00	1.67E+08	0.35
	250	2.45E-01												2.45E-01		2.45E-01		4.00	4.00E-03	-2.40E+00	-6.12E-01	Ea
	260	4.80E-01												4.80E-01		4.80E-01		3.85	3.85E-03	-2.41E+00	-3.19E-01	5.05E+03
	270	9.17E-01												9.17E-01		9.17E-01		3.70	3.70E-03	-2.43E+00	-3.76E-02		1.44
	280	1.71E+00												1.71E+00		1.71E+00		3.57	3.57E-03	-2.45E+00	2.33E-01		2.47E+00
	290	3.12E+00												3.12E+00		3.12E+00		3.45	3.45E-03	-2.46E+00	4.95E-01	-1.68E+01
	298	4.98E+00												4.98E+00	4.98E+00	4.98E+00		3.36	3.36E-03	-2.47E+00	6.97E-01	-4.38E+01
	310	9.79E+00												9.79E+00		9.79E+00		3.23	3.23E-03	-2.49E+00	9.91E-01	-4.07E+01
	320	1.68E+01												1.68E+01		1.68E+01		3.13	3.13E-03	-2.51E+00	1.23E+00	#N/A
	330	2.85E+01												2.85E+01		2.85E+01		3.03	3.03E-03	-2.52E+00	1.45E+00	#N/A
	340	4.75E+01												4.75E+01		4.75E+01		2.94	2.94E-03	-2.53E+00	1.68E+00	A	4.75E+01
	350	7.79E+01												7.79E+01		7.79E+01		2.86	2.86E-03	-2.54E+00	1.89E+00	2.03E-41	1.00
	375	2.53E+02												2.53E+02		2.53E+02		2.67	2.67E-03	-2.57E+00	2.40E+00	n
	400	7.60E+02												7.60E+02		7.60E+02		2.50	2.50E-03	-2.60E+00	2.88E+00	16.79
	425	2.13E+03												2.13E+03		2.13E+03		2.35	2.35E-03	-2.63E+00	3.33E+00	Ea	1.00
	450	5.65E+03												5.65E+03		5.65E+03		2.22	2.22E-03	-2.65E+00	3.75E+00	101	5.65E+03
	P1	2.03E-41
	P2	1.68E+01														Ea shift
	P3	1.01E+02														0.00E+00
-CH2OO. | >CH-	T	Vereecken 2019												T-dependence	Target	Final		1000/T	1/T	log(1/T)	log(-CH2OO. | >CH-)	log(T)	Replicate
	200	5.22E-03												5.22E-03		5.22E-03		5.00	5.00E-03	-2.30E+00	-2.28E+00	A	1.83E-03
	225	3.99E-02												3.99E-02		3.99E-02		4.44	4.44E-03	-2.35E+00	-1.40E+00	1.67E+08	0.35
	250	2.45E-01												2.45E-01		2.45E-01		4.00	4.00E-03	-2.40E+00	-6.12E-01	Ea
	260	4.80E-01												4.80E-01		4.80E-01		3.85	3.85E-03	-2.41E+00	-3.19E-01	5.05E+03
	270	9.17E-01												9.17E-01		9.17E-01		3.70	3.70E-03	-2.43E+00	-3.76E-02		1.44
	280	1.71E+00												1.71E+00		1.71E+00		3.57	3.57E-03	-2.45E+00	2.33E-01		2.47E+00
	290	3.12E+00												3.12E+00		3.12E+00		3.45	3.45E-03	-2.46E+00	4.95E-01	-1.68E+01
	298	4.98E+00												4.98E+00	4.98E+00	4.98E+00		3.36	3.36E-03	-2.47E+00	6.97E-01	-4.38E+01
	310	9.79E+00												9.79E+00		9.79E+00		3.23	3.23E-03	-2.49E+00	9.91E-01	-4.07E+01
	320	1.68E+01												1.68E+01		1.68E+01		3.13	3.13E-03	-2.51E+00	1.23E+00	#N/A
	330	2.85E+01												2.85E+01		2.85E+01		3.03	3.03E-03	-2.52E+00	1.45E+00	#N/A
	340	4.75E+01												4.75E+01		4.75E+01		2.94	2.94E-03	-2.53E+00	1.68E+00	A	4.75E+01
	350	7.79E+01												7.79E+01		7.79E+01		2.86	2.86E-03	-2.54E+00	1.89E+00	2.03E-41	1.00
	375	2.53E+02												2.53E+02		2.53E+02		2.67	2.67E-03	-2.57E+00	2.40E+00	n
	400	7.60E+02												7.60E+02		7.60E+02		2.50	2.50E-03	-2.60E+00	2.88E+00	16.79
	425	2.13E+03												2.13E+03		2.13E+03		2.35	2.35E-03	-2.63E+00	3.33E+00	Ea	1.00
	450	5.65E+03												5.65E+03		5.65E+03		2.22	2.22E-03	-2.65E+00	3.75E+00	101	5.65E+03
	P1
	P2															Ea shift
	P3															-1.38E+02
>CHOO. | >CH-	T													T-dependence	Target	Final		1000/T	1/T	log(1/T)	log(>CHOO. | >CH-)	log(T)	Replicate
	200													5.22E-03		1.04E-02		5.00	5.00E-03	-2.30E+00	-1.98E+00	A	3.63E-03
	225													3.99E-02		7.35E-02		4.44	4.44E-03	-2.35E+00	-1.13E+00	1.67E+08	0.35
	250													2.45E-01		4.24E-01		4.00	4.00E-03	-2.40E+00	-3.73E-01	Ea
	260													4.80E-01		8.15E-01		3.85	3.85E-03	-2.41E+00	-8.91E-02	4.91E+03
	270													9.17E-01		1.53E+00		3.70	3.70E-03	-2.43E+00	1.84E-01		1.44
	280													1.71E+00		2.80E+00		3.57	3.57E-03	-2.45E+00	4.47E-01		4.04E+00
	290													3.12E+00		5.02E+00		3.45	3.45E-03	-2.46E+00	7.01E-01	-1.68E+01
	298													4.98E+00	7.90E+00	7.90E+00		3.36	3.36E-03	-2.47E+00	8.98E-01	1.60E+01
	310													9.79E+00		1.53E+01		3.23	3.23E-03	-2.49E+00	1.18E+00	-4.07E+01
	320													1.68E+01		2.59E+01		3.13	3.13E-03	-2.51E+00	1.41E+00	#N/A
	330													2.85E+01		4.33E+01		3.03	3.03E-03	-2.52E+00	1.64E+00	#N/A
	340													4.75E+01		7.12E+01		2.94	2.94E-03	-2.53E+00	1.85E+00	A	7.12E+01
	350													7.79E+01		1.15E+02		2.86	2.86E-03	-2.54E+00	2.06E+00	2.03E-41	1.00
	375													2.53E+02		3.65E+02		2.67	2.67E-03	-2.57E+00	2.56E+00	n
	400													7.60E+02		1.07E+03		2.50	2.50E-03	-2.60E+00	3.03E+00	16.79
	425													2.13E+03		2.95E+03		2.35	2.35E-03	-2.63E+00	3.47E+00	Ea	1.00
	450													5.65E+03		7.67E+03		2.22	2.22E-03	-2.65E+00	3.88E+00	-37	7.67E+03
	P1
	P2															Ea shift
	P3															1.67E+02
>C(OO.)- | >CH-	T													T-dependence	Target	Final		1000/T	1/T	log(1/T)	log(>C(OO.)- | >CH-)	log(T)	Replicate
	200													5.22E-03		2.26E-03		5.00	5.00E-03	-2.30E+00	-2.65E+00	A	7.91E-04
	225													3.99E-02		1.90E-02		4.44	4.44E-03	-2.35E+00	-1.72E+00	1.67E+08	0.35
	250													2.45E-01		1.25E-01		4.00	4.00E-03	-2.40E+00	-9.02E-01	Ea
	260													4.80E-01		2.52E-01		3.85	3.85E-03	-2.41E+00	-5.98E-01	5.22E+03
	270													9.17E-01		4.94E-01		3.70	3.70E-03	-2.43E+00	-3.07E-01		1.44
	280													1.71E+00		9.42E-01		3.57	3.57E-03	-2.45E+00	-2.60E-02		1.36E+00
	290													3.12E+00		1.75E+00		3.45	3.45E-03	-2.46E+00	2.44E-01	-1.68E+01
	298													4.98E+00	2.84E+00	2.84E+00		3.36	3.36E-03	-2.47E+00	4.53E-01	-1.16E+02
	310													9.79E+00		5.71E+00		3.23	3.23E-03	-2.49E+00	7.56E-01	-4.07E+01
	320													1.68E+01		9.99E+00		3.13	3.13E-03	-2.51E+00	1.00E+00	#N/A
	330													2.85E+01		1.72E+01		3.03	3.03E-03	-2.52E+00	1.23E+00	#N/A
	340													4.75E+01		2.90E+01		2.94	2.94E-03	-2.53E+00	1.46E+00	A	2.90E+01
	350													7.79E+01		4.83E+01		2.86	2.86E-03	-2.54E+00	1.68E+00	2.03E-41	1.00
	375													2.53E+02		1.62E+02		2.67	2.67E-03	-2.57E+00	2.21E+00	n
	400													7.60E+02		5.00E+02		2.50	2.50E-03	-2.60E+00	2.70E+00	16.79
	425													2.13E+03		1.44E+03		2.35	2.35E-03	-2.63E+00	3.16E+00	Ea	1.00
	450													5.65E+03		3.89E+03		2.22	2.22E-03	-2.65E+00	3.59E+00	268	3.89E+03
1,7 Hshift
	Average temperature dependence
																Ea shift
																0.00E+00
	T	-CH2OO. | >CH-												T-dependence	Target	Final		1000/T	1/T	log(1/T)	log()	log(T)	Replicate
	200	9.75E-04												9.75E-04		9.75E-04		5.00	5.00E-03	-2.30E+00	-3.01E+00	A	4.35E-04
	225	1.00E-02												1.00E-02		1.00E-02		4.44	4.44E-03	-2.35E+00	-2.00E+00	1.15E+08	0.45
	250	7.46E-02												7.46E-02		7.46E-02		4.00	4.00E-03	-2.40E+00	-1.13E+00	Ea
	260	1.55E-01												1.55E-01		1.55E-01		3.85	3.85E-03	-2.41E+00	-8.10E-01	5.26E+03
	270	3.10E-01												3.10E-01		3.10E-01		3.70	3.70E-03	-2.43E+00	-5.08E-01		1.33
	280	6.02E-01												6.02E-01		6.02E-01		3.57	3.57E-03	-2.45E+00	-2.21E-01		7.98E-01
	290	1.13E+00												1.13E+00		1.13E+00		3.45	3.45E-03	-2.46E+00	5.40E-02	-1.29E+01
	298	1.84E+00												1.84E+00	1.84E+00	1.84E+00		3.36	3.36E-03	-2.47E+00	2.65E-01	-6.33E+02
	310	3.70E+00												3.70E+00		3.70E+00		3.23	3.23E-03	-2.49E+00	5.69E-01	-2.95E+01
	320	6.46E+00												6.46E+00		6.46E+00		3.13	3.13E-03	-2.51E+00	8.10E-01	#N/A
	330	1.10E+01												1.10E+01		1.10E+01		3.03	3.03E-03	-2.52E+00	1.04E+00	#N/A
	340	1.85E+01												1.85E+01		1.85E+01		2.94	2.94E-03	-2.53E+00	1.27E+00	A	1.85E+01
	350	3.04E+01												3.04E+01		3.04E+01		2.86	2.86E-03	-2.54E+00	1.48E+00	2.91E-30	1.00
	375	9.76E+01												9.76E+01		9.76E+01		2.67	2.67E-03	-2.57E+00	1.99E+00	n
	400	2.86E+02												2.86E+02		2.86E+02		2.50	2.50E-03	-2.60E+00	2.46E+00	12.90
	425	7.76E+02												7.76E+02		7.76E+02		2.35	2.35E-03	-2.63E+00	2.89E+00	Ea	1.00
	450	1.96E+03												1.96E+03		1.96E+03		2.22	2.22E-03	-2.65E+00	3.29E+00	1458	1.96E+03
	P1	2.91E-30
	P2	1.29E+01														Ea shift
	P3	1.46E+03														0.00E+00
-CH2OO. | >CH-	T	Vereecken 2019												T-dependence	Target	Final		1000/T	1/T	log(1/T)	log(-CH2OO. | >CH-)	log(T)	Replicate
	200	9.75E-04												9.75E-04		9.75E-04		5.00	5.00E-03	-2.30E+00	-3.01E+00	A	4.35E-04
	225	1.00E-02												1.00E-02		1.00E-02		4.44	4.44E-03	-2.35E+00	-2.00E+00	1.15E+08	0.45
	250	7.46E-02												7.46E-02		7.46E-02		4.00	4.00E-03	-2.40E+00	-1.13E+00	Ea
	260	1.55E-01												1.55E-01		1.55E-01		3.85	3.85E-03	-2.41E+00	-8.10E-01	5.26E+03
	270	3.10E-01												3.10E-01		3.10E-01		3.70	3.70E-03	-2.43E+00	-5.08E-01		1.33
	280	6.02E-01												6.02E-01		6.02E-01		3.57	3.57E-03	-2.45E+00	-2.21E-01		7.98E-01
	290	1.13E+00												1.13E+00		1.13E+00		3.45	3.45E-03	-2.46E+00	5.40E-02	-1.29E+01
	298	1.84E+00												1.84E+00	1.84E+00	1.84E+00		3.36	3.36E-03	-2.47E+00	2.65E-01	-6.33E+02
	310	3.70E+00												3.70E+00		3.70E+00		3.23	3.23E-03	-2.49E+00	5.69E-01	-2.95E+01
	320	6.46E+00												6.46E+00		6.46E+00		3.13	3.13E-03	-2.51E+00	8.10E-01	#N/A
	330	1.10E+01												1.10E+01		1.10E+01		3.03	3.03E-03	-2.52E+00	1.04E+00	#N/A
	340	1.85E+01												1.85E+01		1.85E+01		2.94	2.94E-03	-2.53E+00	1.27E+00	A	1.85E+01
	350	3.04E+01												3.04E+01		3.04E+01		2.86	2.86E-03	-2.54E+00	1.48E+00	2.91E-30	1.00
	375	9.76E+01												9.76E+01		9.76E+01		2.67	2.67E-03	-2.57E+00	1.99E+00	n
	400	2.86E+02												2.86E+02		2.86E+02		2.50	2.50E-03	-2.60E+00	2.46E+00	12.90
	425	7.76E+02												7.76E+02		7.76E+02		2.35	2.35E-03	-2.63E+00	2.89E+00	Ea	1.00
	450	1.96E+03												1.96E+03		1.96E+03		2.22	2.22E-03	-2.65E+00	3.29E+00	1458	1.96E+03
	P1
	P2															Ea shift
	P3															7.08E+02
>CHOO. | >CH-	T													T-dependence	Target	Final		1000/T	1/T	log(1/T)	log(>CHOO. | >CH-)	log(T)	Replicate
	200													9.75E-04		2.82E-05		5.00	5.00E-03	-2.30E+00	-4.55E+00	A	1.26E-05
	225													1.00E-02		4.30E-04		4.44	4.44E-03	-2.35E+00	-3.37E+00	1.15E+08	0.45
	250													7.46E-02		4.39E-03		4.00	4.00E-03	-2.40E+00	-2.36E+00	Ea
	260													1.55E-01		1.02E-02		3.85	3.85E-03	-2.41E+00	-1.99E+00	5.97E+03
	270													3.10E-01		2.25E-02		3.70	3.70E-03	-2.43E+00	-1.65E+00		1.33
	280													6.02E-01		4.79E-02		3.57	3.57E-03	-2.45E+00	-1.32E+00		6.36E-02
	290													1.13E+00		9.84E-02		3.45	3.45E-03	-2.46E+00	-1.01E+00	-1.29E+01
	298													1.84E+00	1.71E-01	1.71E-01		3.36	3.36E-03	-2.47E+00	-7.67E-01	-9.41E+02
	310													3.70E+00		3.77E-01		3.23	3.23E-03	-2.49E+00	-4.24E-01	-2.95E+01
	320													6.46E+00		7.06E-01		3.13	3.13E-03	-2.51E+00	-1.51E-01	#N/A
	330													1.10E+01		1.29E+00		3.03	3.03E-03	-2.52E+00	1.11E-01	#N/A
	340													1.85E+01		2.30E+00		2.94	2.94E-03	-2.53E+00	3.62E-01	A	2.30E+00
	350													3.04E+01		4.01E+00		2.86	2.86E-03	-2.54E+00	6.03E-01	2.91E-30	1.00
	375													9.76E+01		1.48E+01		2.67	2.67E-03	-2.57E+00	1.17E+00	n
	400													2.86E+02		4.87E+01		2.50	2.50E-03	-2.60E+00	1.69E+00	12.90
	425													7.76E+02		1.46E+02		2.35	2.35E-03	-2.63E+00	2.17E+00	Ea	1.00
	450													1.96E+03		4.07E+02		2.22	2.22E-03	-2.65E+00	2.61E+00	2167	4.07E+02
	P1
	P2															Ea shift
	P3															1.20E+03
>C(OO.)- | >CH-	T													T-dependence	Target	Final		1000/T	1/T	log(1/T)	log(>C(OO.)- | >CH-)	log(T)	Replicate
	200													9.75E-04		2.36E-06		5.00	5.00E-03	-2.30E+00	-5.63E+00	A	1.05E-06
	225													1.00E-02		4.74E-05		4.44	4.44E-03	-2.35E+00	-4.32E+00	1.15E+08	0.45
	250													7.46E-02		6.03E-04		4.00	4.00E-03	-2.40E+00	-3.22E+00	Ea
	260													1.55E-01		1.51E-03		3.85	3.85E-03	-2.41E+00	-2.82E+00	6.47E+03
	270													3.10E-01		3.59E-03		3.70	3.70E-03	-2.43E+00	-2.45E+00		1.33
	280													6.02E-01		8.15E-03		3.57	3.57E-03	-2.45E+00	-2.09E+00		1.08E-02
	290													1.13E+00		1.78E-02		3.45	3.45E-03	-2.46E+00	-1.75E+00	-1.29E+01
	298													1.84E+00	3.24E-02	3.24E-02		3.36	3.36E-03	-2.47E+00	-1.49E+00	-1.16E+03
	310													3.70E+00		7.61E-02		3.23	3.23E-03	-2.49E+00	-1.12E+00	-2.95E+01
	320													6.46E+00		1.50E-01		3.13	3.13E-03	-2.51E+00	-8.24E-01	#N/A
	330													1.10E+01		2.87E-01		3.03	3.03E-03	-2.52E+00	-5.42E-01	#N/A
	340													1.85E+01		5.35E-01		2.94	2.94E-03	-2.53E+00	-2.72E-01	A	5.35E-01
	350													3.04E+01		9.72E-01		2.86	2.86E-03	-2.54E+00	-1.22E-02	2.91E-30	1.00
	375													9.76E+01		3.93E+00		2.67	2.67E-03	-2.57E+00	5.95E-01	n
	400													2.86E+02		1.41E+01		2.50	2.50E-03	-2.60E+00	1.15E+00	12.90
	425													7.76E+02		4.56E+01		2.35	2.35E-03	-2.63E+00	1.66E+00	Ea	1.00
	450													1.96E+03		1.35E+02		2.22	2.22E-03	-2.65E+00	2.13E+00	2663	1.35E+02
